# 1 **The diversity of the immunogenic components of the** 2 **melanoma immunopeptidome.**

3 Katherine Woods<sup>1,2,9</sup>, Pouya Faridi<sup>3,9</sup>, Simone Ostrouska<sup>1,2</sup>, Cyril Deceneux<sup>1,2</sup>,  
4 Stephen Q. Wong<sup>4,5</sup>, Weisan Chen<sup>6</sup>, Ritchlynn Aranha<sup>3</sup>, Nathan P. Croft<sup>3</sup>, Divya  
5 Duscharla<sup>3</sup>, Chen Li<sup>3,7</sup>, Rochelle Ayala<sup>3</sup>, Jonathan Cebon<sup>1,2</sup>, Anthony W. Purcell<sup>3\*</sup>,  
6 Ralf B. Schittenhelm<sup>3,8\*</sup>, Andreas Behren<sup>1,2\*</sup>

7 <sup>1</sup>Cancer Immunobiology, Olivia Newton-John Cancer Research Institute, Austin  
8 Hospital, Heidelberg, Victoria, Australia.

9 <sup>2</sup>School of Cancer Medicine, La Trobe University, Bundoora, Victoria, Australia.

10 <sup>3</sup>Department of Biochemistry and Molecular Biology, Monash Biomedicine  
11 Discovery Institute, Monash University, Clayton, Victoria, Australia.

12 <sup>4</sup>Cancer Research Division, Peter MacCallum Cancer Centre, Melbourne, Victoria,  
13 Australia.

14 <sup>5</sup>Department of Pathology, Peter MacCallum Cancer Centre, Melbourne, Victoria,  
15 Australia.

16 <sup>6</sup>Department of Biochemistry and Genetics, La Trobe Institute for Molecular Science,  
17 La Trobe University, Melbourne, Victoria, Australia.

18 <sup>7</sup>Current Address: Department of Biology, Institute of Molecular Systems Biology,  
19 ETH Zürich, Switzerland

20 <sup>8</sup>Monash Biomedical Proteomics Facility, Monash Biomedicine Discovery Institute,  
21 Monash University, Clayton, Victoria, Australia.

22 <sup>9</sup>These authors contributed equally

23 \*corresponding authors

24

1 [Andreas.behren@onjcri.org.au](mailto:Andreas.behren@onjcri.org.au); [ralf.schittenhelm@monash.edu.au](mailto:ralf.schittenhelm@monash.edu.au) and

2 [anthony.purcell@monash.edu](mailto:anthony.purcell@monash.edu)

3

4 **Running title:** Defining the immunogenic components of the melanoma

5 immunopeptidome.

6

7 **Keywords:** Immunopeptidome, Immunoproteasome, transpeptidation, post-  
8 translational splicing, Melanoma, Antigen processing, IFN $\gamma$ , Inflammation, HLA,  
9 Immunotherapy, DIA/SWATH.

10

## 11 **Summary**

12 Antigen-recognition by CD8<sup>+</sup> T cells is governed largely by the pool of peptide  
13 antigens presented on the cell surface in the context of MHC class I complexes.  
14 Recent studies have shown not only a high degree of plasticity in the  
15 immunopeptidome, but also that a considerable fraction of all presented peptides are  
16 generated through proteasome-mediated splicing of non-contiguous regions of  
17 proteins to form novel peptide antigens. Here we used high-resolution mass-  
18 spectrometry combined with new bioinformatic approaches to characterize the  
19 immunopeptidome of melanoma cells in the presence or absence of interferon- $\gamma$ . In  
20 total, we identified 30,120 peptides and demonstrate that interferon- $\gamma$  induces marked  
21 changes in the peptidome (with an overlap of only 49.3% between conditions as  
22 revealed by data independent acquisition mass spectrometry). Moreover, around 6%  
23 (1,821) of the peptides were identified as *cis*-spliced peptides with 712 derived from  
24 known melanoma-associated antigens. Several of these peptides were shown to be  
25 immunogenic in unrelated melanoma patients. These observations highlight the

1 breadth and complexity of the repertoire of immunogenic peptides that may be  
2 exploited therapeutically and suggest that spliced peptides may be a major class of  
3 tumour antigens.

4

5 **Funding support:** This project was funded in part by Ludwig Cancer Research,  
6 Melanoma Research Alliance (MRA), the Victorian Cancer Agency supported  
7 Melbourne Melanoma Project (MMP), Australian National Health and Medical  
8 Research Council (NHMRC) Project Grants 1007381 and 1165490 (to AWP), and the  
9 Victorian State Government Operational Infrastructure Support Program. JC was  
10 supported by Australian NHMRC Practitioner Fellowship 487905. AWP is supported  
11 by NHMRC Principal Research Fellowship 1137739. AB is the recipient of a  
12 Fellowship from the Victorian Government Department of Health and Human  
13 Services acting through the Victorian Cancer Agency.

14

15 **Conflict of Interest Statement:** The authors declare no conflict of interest.

16

1 **Introduction:**

2 Antigen recognition by cytotoxic T cells and subsequent tumour cell destruction is the  
3 key component underlying cancer immunotherapy strategies. Its importance has been  
4 widely demonstrated, and loss-of-function of elements in the antigen processing and  
5 presentation pathways has been shown to confer therapeutic resistance[1]. Correlative  
6 findings point to neo-antigens arising from tumour mutations as an important source  
7 of immunogenic antigens in the context of melanoma and other cancers[2].  
8 Nonetheless, tumours with low mutational burdens can respond to checkpoint  
9 inhibitor therapy, and the presence of a high tumour-mutational load does not  
10 necessarily correspond to the efficacy of treatment[3]. HLA-presented peptides (*p*-  
11 HLA-I) arising from the mutant proteins are mostly heterogeneously expressed and  
12 additionally determined by the patient-specific HLA-subtypes, making predictions  
13 about their presentation and immunogenicity unreliable. While a number of recent  
14 studies have reported the utility of mass spectrometry combined with exome  
15 sequencing in identifying HLA-presented peptides derived from mutated proteins[4-  
16 6], the analysis of the contribution of mutational neo-antigens to the overall tumour  
17 immunogenicity remains complicated and unresolved.

18 Against this background, the composition of the immunopeptidome, or the repertoire  
19 of HLA-bound peptides presented on the surface of the cell and their contribution to  
20 tumour immune recognition, becomes significant. The immunopeptidome is largely  
21 shaped by antigen processing through the proteasome complex for subsequent  
22 presentation of short peptide epitopes on MHC molecules[7]. Several forms of the  
23 proteasome complex exist, each with differing enzymatic activities[8]. In melanoma  
24 cells, the constitutive proteasome (cP) is expressed under steady state conditions. The  
25 expression of an immunoproteasome (IP), the subtype expressed by dendritic cells

1 and other cells of the immune system, may be induced in tumour cells in a cytokine-  
2 dependant manner [9], leading ultimately to changes in the peptides presented to the  
3 immune system[10, 11]. We have previously demonstrated induction of the IP in a  
4 range of human melanoma cell lines in the presence of the inflammatory cytokine  
5 IFN $\gamma$  *in vitro*, and in melanoma patient inflamed tumours (characterised by presence  
6 of tumour infiltrating lymphocytes (TILs)) *ex vivo*[12]. Dependant on the proteasome  
7 subtype expressed by the cell, we have subsequently shown that a single melanoma  
8 antigen (NY-ESO-1) has the potential for cleavage into multiple differing epitopes.  
9 These differences in antigen processing led to concomitant change in the ability of  
10 antigen specific T cells to target the tumour cell. Thus, the potential for a tumour cell  
11 to 'look' substantially different to CD8<sup>+</sup> T cells, depending on inflammation at the  
12 tumour site, arises. Moreover, recent studies by ourselves and others[13, 14] have  
13 shown that a significant proportion of *p*-HLA-I are not genomically templated and  
14 result from post-translational proteasome splicing (ligation of non-contiguous small  
15 polypeptide segments from the same or different proteins). To date, these peptides  
16 have been missed in most neoantigen discovery studies due to the lack of appropriate  
17 bioinformatics tools[15, 16]. In this study we have used high resolution mass  
18 spectrometry approaches (both data-dependent and data-independent acquisition mass  
19 spectrometry) combined with a novel bioinformatics workflow to not only  
20 demonstrate significant changes in the melanoma immunopeptidome based on  
21 presence or absence of the cytokine IFN $\gamma$ , but also to identify and quantify *cis*-spliced  
22 *p*-HLA-I presented by melanoma cells under both conditions. Those peptides derived  
23 from melanoma-associated or over-expressed proteins were tested for *ex vivo*  
24 immunogenicity in melanoma patients and healthy donors. Both linear and spliced  
25 peptides were found to be immunogenic in both donor groups. Notably, T lymphocyte

1 responses to pools of IFN $\gamma$  upregulated peptides were not seen in healthy donors. We  
2 also demonstrate for the first time that *cis*-spliced peptides are widely presented by  
3 melanoma cells and immunogenic in multiple donors. These findings have significant  
4 implications for cancer immunotherapy as well as for fundamental questions such as  
5 induction of immune-tolerance, T cell repertoires and pathogen recognition.

6

## 7 **Materials and Methods**

### 8 *Human Ethics Approval*

9 Samples used in this study were derived from patients who consented to participate in  
10 a clinical research protocol approved by Austin Health Human Research Ethics  
11 Committee (HREC H2006/02633).

12

### 13 *Melanoma cell line culture*

14 Establishment and characterization of the melanoma cell lines used has been  
15 previously described[17, 18]. Cells were cultured in RF10 consisting of RPMI 1640,  
16 2mM Glutamax, 100 IU/ml Penicillin, 100  $\mu$ g/ml Streptomycin and 10% heat-  
17 inactivated fetal calf serum (all Invitrogen). For induction of immunoproteasome  
18 catalytic subunits cells were incubated with 100 ng/ml IFN $\gamma$  (Peprotech) for 72 h prior  
19 to experiments.

20

### 21 *Melanoma cell line sequencing*

22 Whole exome sequencing of the LM-MEL-44 cell line was performed using the  
23 NimbleGen EZ Exome Library v2.0 kit and run on a Illumina Hiseq2000 instrument  
24 as previously described[19]. Sequence reads were aligned to the human genome (hg19  
25 assembly) using the Burrows–Wheeler Aligner (BWA) program[20]. Single

1 nucleotide variants (SNVs) and indels were identified using the GATK Unified  
2 Genotyper[21], Somatic Indel Detector[22] and MuTect (Broad Institute)[23].

3

#### 4 *Isolation of peptides bound to HLA class I molecules*

5 HLA class I peptides were eluted from LM-MEL-44 cells (prior to or after treatment  
6 with IFN $\gamma$ ) as described previously[24-26]. In brief,  $3 \times 10^9$  cells were lysed in 0.5%  
7 IGEPAL, 50 mM Tris-HCl pH 8.0, 150 mM NaCl supplemented with protease  
8 inhibitors (CompleteProtease Inhibitor Cocktail Tablet; Roche Molecular  
9 Biochemicals) for 45 min at 4 °C. Lysates were cleared by ultracentrifugation at  
10 40,000 g and HLA class I complexes were immunoaffinity purified using W6/32 (pan  
11 anti-HLA-A, B, C) and DT9 (anti HLA-C) monoclonal antibodies.

12

#### 13 *Fractionation of HLA-bound peptides by reversed-phase high-performance liquid* 14 *chromatography (RP-HPLC)*

15 The HLA-peptide eluates were loaded onto a 4.6 mm internal diameter x 50 mm  
16 monolithic C18 RP-HPLC column (Chromolith Speed Rod; Merck) at a flow rate of 1  
17 ml/min using an EttanLC HPLC system (GE Healthcare) with buffer A (0.1%  
18 trifluoroacetic acid (TFA)) and buffer B (80% ACN / 0.1% TFA) as mobile phases.  
19 The bound peptides were separated from the class I heavy chains and  $\beta$ 2m molecules  
20 using increasing concentration of buffer B. Peptide-containing fractions (500  $\mu$ l) were  
21 collected, vacuum concentrated to ~5  $\mu$ l and reconstituted to 15  $\mu$ l with 0.1 % formic  
22 acid (FA). Indexed retention time (iRT) peptides[27] were spiked in for retention time  
23 alignment.

24

1 *Identification of HLA bound-peptides using data-dependent acquisition (DDA)*

2 Using a Dionex UltiMate 3000 RSLCnano system equipped with a Dionex UltiMate  
3 3000 RS autosampler, the samples were loaded via an Acclaim PepMap 100 trap  
4 column (100  $\mu\text{m}$  x 2 cm, nanoViper, C18, 5  $\mu\text{m}$ , 100 $\text{\AA}$ ; Thermo Scientific) onto an  
5 Acclaim PepMap RSLC analytical column (75  $\mu\text{m}$  x 50 cm, nanoViper, C18, 2  $\mu\text{m}$ ,  
6 100 $\text{\AA}$ ; Thermo Scientific). The peptides were separated by increasing concentrations  
7 of 80% ACN / 0.1% FA at a flow of 250 nl/min for 65 min and analyzed with a  
8 QExactive Plus mass spectrometer (Thermo Scientific). In each cycle, a full ms1 scan  
9 (resolution: 70.000; AGC target: 3e6; maximum IT: 120 ms; scan range: 375-1800  
10 m/z) preceded up to 12 subsequent ms2 scans (resolution: 17.500; AGC target: 1e5;  
11 maximum IT: 120 ms; isolation window: 1.8 m/z; scan range: 200-2000 m/z; NCE:  
12 27). To minimize repeated sequencing of the same peptides, dynamic exclusion was  
13 set to 15 sec and the 'exclude isotopes' option was activated.

14

15 *Quantification of HLA bound-peptides using data-independent acquisition mass*  
16 *spectrometry (DIA-MS)*

17 The identical instrument setup as described above (Dionex UltiMate 3000 LC system  
18 coupled to a QExactive Plus mass spectrometer) was used to quantify HLA-bound  
19 peptides using data-independent acquisition (DIA). In each cycle, 28 sequential DIA  
20 windows with an isolation width of 25 m/z between 300 - 1000 Da were acquired  
21 (resolution: 17.500; AGC target: 2e5; maximum IT: auto; NCE: 27) following a full  
22 ms1 scan (resolution: 70.000; AGC target: 3e6; maximum IT: 55 ms; scan range: 300-  
23 1000 m/z). A 90 min gradient of increasing concentrations of 80% ACN / 0.1% FA  
24 was used to separate the peptides for the DIA acquisition.

25



1 *DDA data analysis*

2 Linear and cis-spliced peptide sequences were identified as described previously[14].

3 In brief, the acquired .raw files were searched with PEAKS Studio 8.5

4 (Bioinformatics Solutions) against the human UniProtKB/TrEMBL

5 UniProtKB/SwissProt database (v2017\_10). The parent mass error tolerance was set

6 to 10 ppm and the fragment mass error tolerance to 0.02 Da. Oxidation of M,

7 deamidation of N & Q and phosphorylation of S, T & Y were set as variable

8 modifications and a FDR cutoff of 1% was applied. High confidence *de-novo* peptide

9 sequences without any linear peptide match in the provided database were further

10 interrogated with the “Hybrid finder” algorithm[28] and the identified *cis*-spliced

11 peptide sequences added back to the original UniProtKB/SwissProt database and all

12 data researched using PEAKS DB . Linear and spliced peptides in this search were

13 extracted at 1% FDR to create the final list of identified peptides.

14

15 *DIA data analysis*

16 Spectronaut 11 Pulsar (Biognosys) was used to generate a spectral library, which

17 contained information of all linear and *cis*-spliced HLA class I peptides identified in

18 this study, as well as to quantify peptides within the all DIA dataset.

19

20 *T cell stimulation assay*

21 To assess T cell responses selected peptides were synthesised (Mimotopes, VIC,

22 Australia). PBMC from healthy donors (Australian Red Cross, VIC, Australia), or

23 melanoma patients (Austin Health HREC approved protocol HREC H2006/02633)

24 were purified by density centrifugation over Ficoll Hi-Paque. Cells were cultured in

25 TCRPMI consisting of RPMI 1640, 2mM Glutamax, 100 IU/ml Penicillin, 100 µg/ml

1 Streptomycin, 20 mM HEPES, 1% nonessential amino acids, 1 mM sodium pyruvate,  
2 55  $\mu$ M  $\beta$ -mercaptoethanol, and 10% human AB serum (Australian Red Cross, VIC,  
3 Australia). Peptides were combined into pools of 5-9 peptides as outlined in  
4 Supplementary Table 6.  $10^6$  PBMC/ml were incubated with 10 $\mu$ M each peptide in  
5 pools for 10 - 12 days at 37 °C. IL-2 (100 IU/ml) was added and replaced every 3  
6 days.

7

#### 8 *Intracellular cytokine staining (ICS) of antigen-activated T-lymphocytes*

9 To assess antigen responses, T-lymphocytes were restimulated (following 10 - 12  
10 days incubation as outlined above) with peptide pools for 4-8 h in TCRPMI in  
11 presence of 10  $\mu$ g/ml brefeldin A (BFA, Golgi plug). Cells were washed with PBS  
12 (Invitrogen) labeled with live/dead fixable violet stain (Invitrogen), then incubated  
13 with antibodies against CD3 and CD8 (BD biosciences) for 15 min at 4°C. Samples  
14 were washed and fixed for 20 min at 4°C. Cells were permeabilised and stained with  
15 anti-TNF $\alpha$  (eBiosciences) for 25 min at 4°C. The gating strategy was: SSC/FSC;  
16 Singlets; SSC/LD $^-$ ; CD3 $^+$ /CD8 $^+$ ; CD8 $^+$ /TNF $\alpha$  $^+$ . Data were acquired on a FACSCanto  
17 (BD biosciences, VIC Australia) and analyzed with FlowJo software (Version 10,  
18 FlowJo, Ashland OR, USA). To account for the large variation in DMSO background  
19 CD8 $^+$  T cell activity across multiple donors, signals were normalized by subtracting  
20 the background from DMSO control treated samples in each case.

21

#### 22 *HLA-A2 stabilisation assays*

23 The binding activity of the peptides was assayed by measuring peptide-induced  
24 stabilization of HLA-A2 on TAP-deficient T2 cells by flow cytometry. T2 cells were  
25 cultured in RF-10 (RPMI with 10% serum, 5% Glutamine, 5% Pen/Strep) in T25

1 flasks for 2 – 3 days before the assay. T2 cells ( $2 \times 10^5$  cells/well) were cultured for 16  
2 h at 37 °C in 5% CO<sub>2</sub> in 200 μL RF-10 in 96-well U-bottomed plates in presence or  
3 absence of 10 μg/ml of synthetic peptides. Peptides from Melan-A (modified aa26-35  
4 ELA.....and aa 60-72) served as a positive or negative controls respectively. All  
5 peptides were tested in triplicate.

6 After 16 h stimulation the cells were washed and stained with anti-HLA A2  
7 monoclonal antibody BB7.2 (Biolegend) for 30 min. at 4 °C. Cells were subsequently  
8 stained with Fixable Viability Kit (Zombie NIR™, Biolegend) for 15 min. at 4 °C  
9 before flow cytometry on a FacsCanto (BD). Data was analysed using FlowJo  
10 software (Version 10, FlowJo, Ashland OR, USA).

11

1 **Results:**

2 *The melanoma immunopeptidome contains a large proportion of cis-spliced peptides.*

3 To establish a comprehensive repository of HLA class I peptide ligands presented by  
4 melanoma cells utilizing either the canonical proteasome (cP) or the  
5 immunoproteasome (IP), we cultured the patient-derived melanoma cell line LM-  
6 MEL-44[18] in the absence or presence of IFN $\gamma$  for 3 days to allow for turnover of  
7 the cell-surface presented epitopes[29], and then subjected to the workflow outlined in  
8 Figure 1a. Briefly, HLA class I molecules were affinity purified with the HLA-C (DT-  
9 9) and pan-HLA-ABC antibodies (W6/32) and HLA-bound peptides were pre-  
10 fractionated by HPLC prior to analysis by data-dependent acquisition mass  
11 spectrometry (DDA-MS). Data was analysed by Peaks 8.5 software and spliced  
12 peptides further characterised using the HybridFinder algorithm[14].

13 We identified a total of 30,120 peptides (derived from 12,025 source proteins)  
14 presented across all HLA class I allotypes expressed by the LM-MEL-44 cells at a  
15 false discovery rate (FDR) of 1% (Supplementary Table 1). Approximately 6% of  
16 these peptides (1,821 peptides) were assigned as *cis*-spliced in origin (Fig 1b,  
17 Supplementary Fig 1a, Supplementary Table 1), being derived from non-contiguous  
18 sequences of the same protein. While *trans*-splicing has been described to contribute  
19 to the cellular immunopeptidome as well[14], we have here focused on *cis*-spliced  
20 peptides only due to the availability of appropriate bioinformatics workflows. This  
21 proportion of peptides of *cis*-spliced origin is in agreement with our previous  
22 study[14] and others [30, 31]. As expected for HLA class I epitopes, the majority of  
23 peptides (27,321 peptides; ~90%) were between 8-12 amino acids in length with no  
24 apparent difference between linear and *cis*-spliced sequences (Supplementary Figure  
25 1b). Using the NetMHCpan binding algorithm[32], 91.2% of these 8-12mers were

1 predicted to bind to at least one of the HLA class I alleles expressed on the surface of  
2 the LM-MEL-44 cells (A\*02:01,B\*60/\*44:02,C\*03:04/\*05:01)[33] suggesting that  
3 the majority of the identified peptide sequences can be considered genuine HLA class  
4 I ligands (Supplementary Table 2). The percentage of predicted binders was lower for  
5 *cis*-spliced peptides compared to linear peptides (68.5% vs. 92.9%), which can be  
6 attributed to the fact that NetMHCpan and other binding algorithms have been  
7 developed and based on consensus-binding motifs of linear epitopes, which can differ  
8 slightly from consensus-binding motifs of *cis*-spliced peptides[13, 14]. Indeed, similar  
9 marginal differences between the consensus-binding motifs of linear and *cis*-spliced  
10 epitopes are also evident in this dataset, which are more pronounced at the *N*-terminal  
11 anchor positions P2 / P3 compared to the *C*-terminal PΩ position (Figure 1c).

12 Taken together, we identified more than 30,000 predominantly novel HLA class I  
13 ligands presented on the surface of the LM-MEL-44 melanoma cells including nearly  
14 2,000 *cis*-spliced peptides, which have not been described before. Of note, none of the  
15 mutational neoantigens predicted based on exome sequencing data of LM-MEL-  
16 44[34] were identified in our dataset (Supplementary table 3); however this cell line  
17 has a relatively low mutational load.

18

19 *IFN*γ-treatment leads to significant changes in the MHC class I presented peptide  
20 pool. Considering the well-described clinical relevance of so called “hot” versus  
21 “cold” tumour microenvironments and previous work demonstrating the influence of  
22 cytokine exposure on antigen-presentation pathways[10], we wanted to examine on a  
23 global scale the impact of *IFN*γ exposure on the immunopeptidome. An initial  
24 qualitative analysis revealed that only 49.3% of the 30,120 peptides were identified  
25 under both conditions demonstrating that the addition of *IFN*γ significantly changes

1 the composition of the immunopeptidome (Figure 2a). To measure these differences  
2 quantitatively, we combined all IFN $\gamma$ -treated or non-treated fractions and analysed  
3 these samples by data-independent acquisition mass spectrometry (DIA-MS; Figure  
4 1a) using a spectral library, which has been created based on our DDA data in the  
5 presence of iRT peptides ([27]; Supplementary Figure 2). After applying stringent  
6 filter criteria, we were able to quantify a total of 9,799 peptides (Supplementary Table  
7 4). 3,553 of these peptides (~36%) were only quantified in one of the two conditions  
8 with a q-value of less than 1% and can be considered as condition-specific, which is  
9 in good agreement with our initial comparative analysis.

10 The remaining 6,246 peptides (~64%) were quantified in both conditions with  
11 corresponding q-values of less than 1% suggesting that these peptides are presented  
12 by melanoma cells both in the presence and absence of IFN $\gamma$ . To determine their  
13 degree of variation, we calculated their log<sub>2</sub> fold changes (+IFN $\gamma$ /- IFN $\gamma$ ) and  
14 plotted these values as violin plots separately for linear and *cis*-spliced peptides  
15 (Figure 2b). A considerable proportion (2,183 peptides, ~35%) were observed to  
16 change in abundance by at least by a factor of 2, confirming that the addition of IFN $\gamma$   
17 substantially changes HLA class I presentation, while not affecting the proportion of  
18 presented *cis*-spliced epitopes on LM-MEL-44 melanoma cells.

19 This DIA-MS dataset contains 439 peptides, which have been quantified based on  
20 their doubly as well as triply charged precursor ions in both conditions. The resulting  
21 fold changes are nearly identical with a Pearson correlation coefficient of 0.899 (p-  
22 value <0.001) and a near perfect linear regression curve (Supplementary Figure 3),  
23 which highlights the precision of the quantitation using DIA-MS data.

24

1 *Identification of novel cancer specific peptides in the melanoma immunopeptidome.*

2 Next we screened our results for peptides derived from proteins previously described  
3 as melanoma-associated antigens (MAA)[35, 36] as well as for tumour antigens with  
4 demonstrated immunogenicity[37-39]. We identified a total of 712 peptides in our  
5 dataset (674 linear, 38 spliced peptides) derived from 96 different MAAs (Figure 3a,  
6 Supplementary Table 5). Approximately 10% of the linear MAA-derived peptides  
7 identified in our study have previously been described as CD8<sup>+</sup> T cell epitopes, thus a  
8 high proportion of the linear peptides and all of those generated by splicing, constitute  
9 novel peptides (Figure 3b). Of the previously reported epitopes, the majority were  
10 present in both the presence and absence of IFN $\gamma$ , whereas >28% of novel peptides  
11 were exclusive to IFN $\gamma$  treated samples, demonstrating the importance of carefully  
12 considering experimental conditions for epitope identification (Figure 3c).

13

14 *CD8<sup>+</sup> T lymphocytes frequently recognised novel linear melanoma-specific epitopes.*

15 HLA-A2 is one of the most prevalent HLA-types worldwide, and efforts to identify  
16 common HLA- peptides for a large number of patients often focus on this serotype.  
17 Therefore, we addressed functional immunogenicity of a selection of predicted HLA-  
18 A2 binding, novel linear melanoma-specific epitopes by using them to stimulate CD8<sup>+</sup>  
19 T lymphocytes in PBMC derived from healthy donors or melanoma patients  
20 (Supplementary table 6). To confirm their A2 specificity, we have included HLA-A2  
21 negative melanoma patients and healthy donors as controls wherever feasible, here  
22 represented by melanoma patient 6. Alongside these assays, we also assessed  
23 differences in functional immunogenicity of IP or cP processed epitopes by pooling  
24 these peptides into groups of those which were up- or down- regulated following  
25 IFN $\gamma$  treatment (Figure 4). Of note, the LM-MEL-44 cell line was derived from

1 melanoma patient 2. We found that CD8<sup>+</sup> T lymphocyte responses to the tested  
2 peptides were more frequently seen in melanoma patients (Figure 4a (individual) and  
3 4b (pooled donors)). Novel peptides derived from 15 of the melanoma antigens  
4 identified in our screen stimulated specific CD8<sup>+</sup> T lymphocyte responses (over 2%  
5 TNF $\alpha$ <sup>+</sup> cells) in three or more donors, demonstrating novel, functional, melanoma T  
6 cell epitopes (highlighted in Supplementary Table 6, Representative examples, Figure  
7 4c). The strongest responses were induced by the peptides derived from SART1  
8 (U4/U6.U5 tri-snRNP-associated protein 1) and PGK1 (Phosphoglycerate kinase 1),  
9 both of which stimulated responses in 2-7% of T lymphocytes from 4 melanoma  
10 patients. When the same selection of peptides were pooled in groups of those up/down  
11 regulated, or unchanged following IFN $\gamma$  treatment no appreciable difference in  
12 functional immunogenicity in melanoma patients was observed between groups.  
13 Interestingly however, T lymphocyte responses to pools of IFN $\gamma$  upregulated peptides  
14 were not seen in healthy donors. One pool in each group was made on the basis of  
15 higher *in silico*-predicted immunogenicity ([www.iedb.org](http://www.iedb.org)[40], Figure 4a,b, asterisks).  
16 However, these groups did not display enhanced ability to activate CD8<sup>+</sup> T  
17 lymphocytes in either melanoma patients or healthy donors.

18

19 *Melanoma patients expressing immunoproteasome genes have a survival advantage.*

20 Tumour recognition *in vivo* relies on the processing and generation of cognate  
21 peptides within the tumour cells. As antigen presenting cells (APCs) use the  
22 immunoproteasome for protein processing and subsequent HLA-loading, tumours that  
23 express the IP as opposed to the constitutive form should display a similar peptide  
24 repertoire as APCs, which should avoid T-cell-p-HLA mismatch and therefore lead to  
25 a greater likelihood of encountering matched T cells. Using OncoLnc[41], we mined



1 gene-expression data generated by the TCGA Research Network  
2 (<http://cancergenome.nih.gov/>) for correlation of both IP and cP-specific genes with  
3 survival in melanoma patients. We found that expression of all three IP-specific  
4 subunits was highly significantly associated with survival in melanoma patients.  
5 Conversely, cP-specific subunits were associated with decreased melanoma patient  
6 survival (Figure 5).

7 Since IP subunits are also expressed by immune cells, including TILs, we removed  
8 the top quartile of samples with the highest CD3 expression. In these tumours IP  
9 expression to a large extent is likely generated by immune infiltrates themselves.  
10 Following removal of these samples, we found that a significant survival benefit,  
11 associated with 2/3 IP subunits, was maintained (Supplementary Figure 4).  
12 Furthermore, presence of the 3 cP subunits was associated with a trend towards  
13 decreased survival. This indicates that patients whose tumours express an IP have  
14 survival benefit which is specifically associated with this proteasome type. As IP  
15 expression in tumours is driven by cytokine exposure it remains unclear if this is  
16 merely a footprint of a successful immune recognition or if it is part of the pre-  
17 conditions to allow for it.

18

19 *Spliced peptides are immunogenic across patients and represent novel targets for*  
20 *immunotherapy*

21 The potential implications of the presence of spliced peptides for all facets of  
22 immunity have sparked intense discussions in the last 2 years[14, 42-44]. In cancer,  
23 their presence would dramatically widen the repertoire of potentially targetable  
24 epitopes and may allow for many more tumour-specific antigens (including  
25 mutational derived neoantigens) being presented in various HLA-contexts. So far only

1 6 immunogenic *cis*-spliced peptides derived from 4 different proteins[42] have been  
2 described and most of them have been discovered by T cell assays rather than by mass  
3 spectrometry[45-50]. To test some of the identified spliced peptides for their ability to  
4 activate CD8<sup>+</sup> T cells *in-vitro* we synthesized 26 *cis*-spliced peptides based on (i)  
5 their *de-novo* sequencing confidence score, (ii) their NetMHC4 binding prediction  
6 score for 3 HLA alleles expressed on LM-MEL-44 cells (HLA-A\*02:01, HLA-  
7 B\*44:02 or HLA-C\*05:01) and (iii) the quality of their peptide spectrum matches  
8 (PSMs). When employed as pools of 8-9 individual peptides, all 3 pools evoked  
9 immune-responses as measured by intracellular TNF $\alpha$  production in CD8<sup>+</sup> T cells  
10 (Figure 6a) in multiple HLA-A2 positive melanoma patients. These responses were  
11 more prominent in patients compared to healthy HLA-A2<sup>+</sup> donors (Figure 6b).  
12 Given the differences in the potential to stimulate HLA-A2 positive vs. negative  
13 patient and healthy donor samples, most of the immunogenic peptides in our assays  
14 seem to be HLA-A2 associated. To identify specific immunogenic peptides, PBMCs  
15 were stimulated with the peptide pools (Figure 7a) for 10-12 days followed by single  
16 peptide re-stimulation. Six out of 26 peptides induced a TNF- $\alpha$  response above  
17 background (Figure 7b) in at least one melanoma patient. Of note, the peptide  
18 demonstrating the highest immunogenicity based on these assays is a spliced peptide  
19 derived from a cancer-testis antigen, MAGE-C2 and showed CD8<sup>+</sup> T cell activation  
20 across 3 patients. These data show that these spliced peptides can serve as *bona fide*  
21 anti-cancer targets and provide a large number of additional targets that have been  
22 previously unknown. Of note, all immunogenic peptides that tested positive for  
23 immunogenicity in our assays were subjected to T2 peptide binding assays to confirm  
24 their HLA A2 specificity. As shown in Figure 7c, these peptides all stabilize HLA-

1 A2, albeit weaker than the well described modified ELAGIGILTV HLA-A2 peptide  
2 (aa26-35) from the melanoma antigen Melan-A[51].

3

#### 4 **Discussion:**

5 In this study we have established a detailed and in-depth immunopeptidome presented  
6 on the LM-MEL-44 cell line, which is a patient-derived melanoma cell line derived  
7 from a lymph node metastasis. Our qualitative assessment of the immunopeptidome  
8 yielded over 30,000 high confidence peptide identifications that encompassed two  
9 culture conditions (+/- IFN $\gamma$ ). Surprisingly only 50% of these peptides were identified  
10 in both conditions. To more accurately assess the overlap and plasticity of the LM-  
11 MEL-44 immunopeptidome we used data-independent acquisition mass spectrometry  
12 (DIA-MS) to quantify the IFN $\gamma$  induced changes in the melanoma immunopeptidome.  
13 Although this state-of-the-art, mass spectrometric technique has been developed  
14 several years ago[52, 53], only a handful of studies have exploited DIA-MS to  
15 quantify HLA peptide ligands so far[38, 54-58]. The well-described effect of IFN $\alpha$  in  
16 mediating changes to the composition of the antigen processing machinery, coupled  
17 with reports of differences in antigen processing between the cP and the IP over  
18 several years, led us to expect a degree of difference between the two  
19 immunopeptidomes. Nevertheless, our observation that ~35% of the HLA class I  
20 epitopes were exclusive to either IFN $\gamma$  treated or untreated conditions, and that an  
21 additional 35% were observed to change more than 2-fold in presence of IFN $\alpha$ ,  
22 reflect the profound impact of this cytokine on the composition of the  
23 immunopeptidome. Our observations are also consistent with recent studies in ovarian  
24 and lung cancer[10, 11]. For example, in ovarian cancer, a 9% difference in peptides

1 presented between IFN $\gamma$  treated/untreated conditions was observed following 24 h of  
2 IFN $\gamma$  treatment (as opposed to 72 h in our study).

3 In our study, MAA-derived peptides were found in roughly equal proportions in IFN $\gamma$   
4 treated (28.8%), or untreated (20%) settings. Interestingly however, of the MAA  
5 epitopes that have been previously described in other studies, only 2.8% were present  
6 in IFN $\gamma$  treated (IP) conditions (Figure 5c). This observation suggests that many IP  
7 processed epitopes may be as yet undescribed, since traditional approaches to identify  
8 tumour associated antigens have largely been undertaken using cells lines under  
9 steady state conditions (*i.e.* which express cP). Furthermore, of the previously  
10 described cancer *cis*-spliced peptides, 3 have been shown to be processed exclusively  
11 by the cP, and 2 by both the cP and the IP (and 1 undetermined)[42].

12 It is evident from our study that the steady state immunopeptidome may vary  
13 dramatically from the *in vivo* tumour scenario depending on the tumour  
14 microenvironment at any given time. Though our functional studies did not reveal a  
15 difference in the immunogenicity of peptides derived from either IFN $\gamma$  treated or  
16 untreated conditions, in the *in vivo* setting a T cell response to IFN $\gamma$  related epitopes is  
17 likely to be aided by correlative IFN $\gamma$  influences, such as upregulation of surface  
18 HLA[59]. Taken together, it is tempting to speculate that antigen processed *via* the  
19 IP may represent an untapped resource of “IFN $\gamma$ -associated neo-epitopes”.

20 The potential for tumour escape from CD8<sup>+</sup> T lymphocyte killing due to whole scale  
21 change to the immunopeptidome upon initiation of an anti-tumour responses, and  
22 corresponding induction of IFN $\gamma$  is clear. These data become particularly significant  
23 in the context of recent studies demonstrating that tumours with an IFN $\gamma$ -inflamed, or  
24 ‘hot’ microenvironment are associated with better prognosis, and are more likely to be  
25 amenable to treatment with immune checkpoint inhibitors[60]. It seems conceivable

1 that *in vivo* the difference between immunopeptidomes is indeed of immunological  
2 relevance to disease progression and overall patient prognosis.

3 The identification of spliced peptides as tumour antigens in cancer was first described  
4 in 2004 in both the FGF5 protein in renal cancer[45] and the gp100 protein in  
5 melanoma[46], and since then only a further 4 *cis*-spliced peptides have been  
6 described in cancer[42]. To date their identification has been hampered by lack of  
7 feasible identification methods. In this study, we have used high-resolution mass  
8 spectrometry to identify more than 30,000 endogenous HLA class I peptide ligands.  
9 Approximately 2,000 (6%) of these peptides represent *cis*-spliced peptides  
10 demonstrating that *cis*-spliced peptides are commonly generated in cancer cells, which  
11 broadens the repertoire of potential targets in cancer immunotherapy. Consistent with  
12 our observations a recent study by Liepe *et al*[13] identified 750 and 486 *cis*-spliced  
13 peptides in colon and breast cancer cell lines respectively – however their  
14 immunogenicity was not described. Of note, 38 of our 2,000 *cis*-spliced peptides (and  
15 712 of all identified peptides) were derived from melanoma-associated antigens, and  
16 with the exception of a few linear epitopes, none of these epitopes have been  
17 described before. Interestingly, of those that had been described, most were identified  
18 by mass spectrometry based immunopeptidome screening studies[38, 39]. Although  
19 others have identified HLA-binding *cis*-spliced epitopes by bioinformatic approaches  
20 [11, 61], few have addressed the functional immunogenicity of the identified epitopes  
21 – *i.e.* can a T lymphocyte recognise and respond to it? Importantly, we demonstrated  
22 functional immunogenicity of 6 (23%) of the *cis*-spliced epitopes, which represents a  
23 significant advance in the field since it doubles the number of known immunogenic  
24 cancer *cis*-spliced peptides and validates a platform to identify these going forward.  
25

## 1   **References:**

- 2   1.   Cai, L., et al., *Defective HLA class I antigen processing machinery in cancer*.  
3       Cancer Immunol Immunother, 2018. **67**(6): p. 999-1009.
- 4   2.   Parmiani, G., et al., *Unique human tumor antigens: immunobiology and use in*  
5       *clinical trials*. J Immunol, 2007. **178**(4): p. 1975-9.
- 6   3.   Goodman, A.M., et al., *Tumor Mutational Burden as an Independent*  
7       *Predictor of Response to Immunotherapy in Diverse Cancers*. Mol Cancer  
8       Ther, 2017. **16**(11): p. 2598-2608.
- 9   4.   Schumacher, T.N. and R.D. Schreiber, *Neoantigens in cancer immunotherapy*.  
10       Science, 2015. **348**(6230): p. 69-74.
- 11 5.   Ott, P.A., et al., *An immunogenic personal neoantigen vaccine for patients*  
12       *with melanoma*. Nature, 2017. **547**(7662): p. 217-221.
- 13 6.   Yadav, M., et al., *Predicting immunogenic tumour mutations by combining*  
14       *mass spectrometry and exome sequencing*. Nature, 2014. **515**(7528): p. 572-6.
- 15 7.   Vigneron, N. and B.J. Van den Eynde, *Proteasome subtypes and regulators in*  
16       *the processing of antigenic peptides presented by class I molecules of the*  
17       *major histocompatibility complex*. Biomolecules, 2014. **4**(4): p. 994-1025.
- 18 8.   Dahlmann, B., *Mammalian proteasome subtypes: Their diversity in structure*  
19       *and function*. Arch Biochem Biophys, 2016. **591**: p. 132-40.
- 20 9.   Yang, Y., et al., *Proteasomes are regulated by interferon gamma: implications*  
21       *for antigen processing*. Proc Natl Acad Sci U S A, 1992. **89**(11): p. 4928-32.
- 22 10.  Javitt, A., et al., *Pro-inflammatory cytokines alter the immunopeptidome*  
23       *landscape by modulation of HLA-B expression*. Frontiers in Immunology,  
24       2019. **10**(141).
- 25 11.  Chong, C., et al., *High-throughput and Sensitive Immunopeptidomics Platform*  
26       *Reveals Profound Interferongamma-Mediated Remodeling of the Human*  
27       *Leukocyte Antigen (HLA) Ligandome*. Mol Cell Proteomics, 2018. **17**(3): p.  
28       533-548.
- 29 12.  Woods, K., et al., *Mismatch in epitope specificities between IFNgamma*  
30       *inflamed and uninflamed conditions leads to escape from T lymphocyte killing*  
31       *in melanoma*. J Immunother Cancer, 2016. **4**: p. 10.
- 32 13.  Liepe, J., et al., *A large fraction of HLA class I ligands are proteasome-*  
33       *generated spliced peptides*. Science, 2016. **354**(6310): p. 354-358.
- 34 14.  Faridi, P., et al., *A subset of HLA-I peptides are not genomically templated:*  
35       *Evidence for cis- and trans-spliced peptide ligands*. Sci Immunol, 2018. **3**(28).
- 36 15.  Faridi, P., A.W. Purcell, and N.P. Croft, *In Immunopeptidomics We Need a*  
37       *Sniper Instead of a Shotgun*. Proteomics, 2018. **18**(12): p. e1700464.
- 38 16.  Liepe, J., et al., *Mapping the MHC Class I-Spliced Immunopeptidome of*  
39       *Cancer Cells*. Cancer Immunol Res, 2019. **7**(1): p. 62-76.
- 40 17.  Anaka, M., et al., *Stem cell media culture of melanoma results in the induction*  
41       *of a nonrepresentative neural expression profile*. Stem Cells, 2012. **30**(2): p.  
42       336-43.
- 43 18.  Behren, A., et al., *The Ludwig institute for cancer research Melbourne*  
44       *melanoma cell line panel*. Pigment Cell Melanoma Res, 2013. **26**(4): p. 597-  
45       600.
- 46 19.  Wong, S.Q., et al., *Whole exome sequencing identifies a recurrent RQCD1*  
47       *P131L mutation in cutaneous melanoma*. Oncotarget, 2015. **6**(2): p. 1115-27.
- 48 20.  Li, H. and R. Durbin, *Fast and accurate short read alignment with Burrows-*  
49       *Wheeler transform*. Bioinformatics, 2009. **25**(14): p. 1754-60.

- 1 21. McKenna, A., et al., *The Genome Analysis Toolkit: a MapReduce framework*  
2 *for analyzing next-generation DNA sequencing data*. Genome Res, 2010.  
3 **20**(9): p. 1297-303.
- 4 22. DePristo, M.A., et al., *A framework for variation discovery and genotyping*  
5 *using next-generation DNA sequencing data*. Nat Genet, 2011. **43**(5): p. 491-8.
- 6 23. Cibulskis, K., et al., *Sensitive detection of somatic point mutations in impure*  
7 *and heterogeneous cancer samples*. Nat Biotechnol, 2013. **31**(3): p. 213-9.
- 8 24. Illing, P.T., et al., *Immune self-reactivity triggered by drug-modified HLA-*  
9 *peptide repertoire*. Nature, 2012. **486**(7404): p. 554-8.
- 10 25. Croft, N.P., et al., *Kinetics of antigen expression and epitope presentation*  
11 *during virus infection*. PLoS Pathog, 2013. **9**(1): p. e1003129.
- 12 26. Schittenhelm, R.B., et al., *Revisiting the arthritogenic peptide theory:*  
13 *quantitative not qualitative changes in the peptide repertoire of HLA-B27*  
14 *allotypes*. Arthritis Rheumatol, 2015. **67**(3): p. 702-13.
- 15 27. Escher, C., et al., *Using iRT, a normalized retention time for more targeted*  
16 *measurement of peptides*. Proteomics, 2012. **12**(8): p. 1111-21.
- 17 28. Faridi, P., et al., *A subset of HLA-I peptides are not genomically templated:*  
18 *Evidence for cis- and trans-spliced peptide ligands*. Science Immunology,  
19 2018. **3**(28).
- 20 29. Prevosto, C., et al., *Allele-Independent Turnover of Human Leukocyte Antigen*  
21 *(HLA) Class Ia Molecules*. PLoS One, 2016. **11**(8): p. e0161011.
- 22 30. Mylonas, R., et al., *Estimating the Contribution of Proteasomal Spliced*  
23 *Peptides to the HLA-I Ligandome*. Mol Cell Proteomics, 2018. **17**(12): p.  
24 2347-2357.
- 25 31. Rolfs, Z., et al., *Global Identification of Post-Translationally Spliced Peptides*  
26 *with Neo-Fusion*. J Proteome Res, 2018.
- 27 32. Karosiene, E., et al., *NetMHCcons: a consensus method for the major*  
28 *histocompatibility complex class I predictions*. Immunogenetics, 2012. **64**(3):  
29 p. 177-86.
- 30 33. Ebert, L.M., et al., *The regulatory T cell-associated transcription factor*  
31 *FoxP3 is expressed by tumor cells*. Cancer Res, 2008. **68**(8): p. 3001-9.
- 32 34. Alexandrov, L.B., et al., *Signatures of mutational processes in human cancer*.  
33 Nature, 2013. **500**(7463): p. 415-21.
- 34 35. Pitcovski, J., et al., *Melanoma antigens and related immunological markers*.  
35 Crit Rev Oncol Hematol, 2017. **115**: p. 36-49.
- 36 36. Simpson, A.J., et al., *Cancer/testis antigens, gametogenesis and cancer*. Nat  
37 Rev Cancer, 2005. **5**(8): p. 615-25.
- 38 37. Vigneron, N., et al., *Database of T cell-defined human tumor antigens: the*  
39 *2013 update*. Cancer Immun, 2013. **13**: p. 15.
- 40 38. Ritz, D., et al., *Data-Independent Acquisition of HLA Class I Peptidomes on*  
41 *the Q Exactive Mass Spectrometer Platform*. Proteomics, 2017. **17**(19).
- 42 39. Gloger, A., et al., *Mass spectrometric analysis of the HLA class I peptidome of*  
43 *melanoma cell lines as a promising tool for the identification of putative*  
44 *tumor-associated HLA epitopes*. Cancer Immunol Immunother, 2016. **65**(11):  
45 p. 1377-1393.
- 46 40. Vita, R., et al., *The Immune Epitope Database (IEDB): 2018 update*. Nucleic  
47 Acids Res, 2019. **47**(D1): p. D339-D343.
- 48 41. Anaya, J., *OncoLnc: linking TCGA survival data to mRNAs, miRNAs, and*  
49 *lncRNAs*. PeerJ CompSci, 2016. **2**(e67).



- 1 42. Vigneron, N., et al., *Peptide splicing by the proteasome*. J Biol Chem, 2017.  
2 **292**(51): p. 21170-21179.
- 3 43. Platteel, A.C.M., et al., *An Unexpected Major Role for Proteasome-Catalyzed*  
4 *Peptide Splicing in Generation of T Cell Epitopes: Is There Relevance for*  
5 *Vaccine Development?* Front Immunol, 2017. **8**: p. 1441.
- 6 44. Liepe, J., H. Ovaa, and M. Mishto, *Why do proteases mess up with antigen*  
7 *presentation by re-shuffling antigen sequences?* Curr Opin Immunol, 2018.  
8 **52**: p. 81-86.
- 9 45. Hanada, K., J.W. Yewdell, and J.C. Yang, *Immune recognition of a human*  
10 *renal cancer antigen through post-translational protein splicing*. Nature,  
11 2004. **427**(6971): p. 252-6.
- 12 46. Vigneron, N., et al., *An antigenic peptide produced by peptide splicing in the*  
13 *proteasome*. Science, 2004. **304**(5670): p. 587-90.
- 14 47. Warren, E.H., et al., *An antigen produced by splicing of noncontiguous*  
15 *peptides in the reverse order*. Science, 2006. **313**(5792): p. 1444-7.
- 16 48. Dalet, A., et al., *An antigenic peptide produced by reverse splicing and double*  
17 *asparagine deamidation*. Proc Natl Acad Sci U S A, 2011. **108**(29): p. E323-  
18 31.
- 19 49. Michaux, A., et al., *A spliced antigenic peptide comprising a single spliced*  
20 *amino acid is produced in the proteasome by reverse splicing of a longer*  
21 *peptide fragment followed by trimming*. J Immunol, 2014. **192**(4): p. 1962-71.
- 22 50. Ebstein, F., et al., *Exposure to Melan-A/MART-126-35 tumor epitope specific*  
23 *CD8(+)T cells reveals immune escape by affecting the ubiquitin-proteasome*  
24 *system (UPS)*. Sci Rep, 2016. **6**: p. 25208.
- 25 51. Kawakami, Y., et al., *Identification of the immunodominant peptides of the*  
26 *MART-1 human melanoma antigen recognized by the majority of HLA-A2-*  
27 *restricted tumor infiltrating lymphocytes*. J Exp Med, 1994. **180**(1): p. 347-52.
- 28 52. Gillet, L.C., et al., *Targeted data extraction of the MS/MS spectra generated*  
29 *by data-independent acquisition: a new concept for consistent and accurate*  
30 *proteome analysis*. Mol Cell Proteomics, 2012. **11**(6): p. O111 016717.
- 31 53. Tate, S., et al., *Label-free quantitative proteomics trends for protein-protein*  
32 *interactions*. J Proteomics, 2013. **81**: p. 91-101.
- 33 54. Croft, N.P., A.W. Purcell, and D.C. Tschärke, *Quantifying epitope*  
34 *presentation using mass spectrometry*. Mol Immunol, 2015. **68**(2 Pt A): p. 77-  
35 80.
- 36 55. Schittenhelm, R.B., et al., *Human Leukocyte Antigen (HLA) B27 Allotype-*  
37 *Specific Binding and Candidate Arthritogenic Peptides Revealed through*  
38 *Heuristic Clustering of Data-independent Acquisition Mass Spectrometry*  
39 *(DIA-MS) Data*. Mol Cell Proteomics, 2016. **15**(6): p. 1867-76.
- 40 56. Caron, E., et al., *An open-source computational and data resource to analyze*  
41 *digital maps of immunopeptidomes*. Elife, 2015. **4**.
- 42 57. Faridi, P., R. Aebersold, and E. Caron, *A first dataset toward a standardized*  
43 *community-driven global mapping of the human immunopeptidome*. Data  
44 Brief, 2016. **7**: p. 201-5.
- 45 58. Ritz, D., et al., *Membranal and Blood-Soluble HLA Class II Peptidome*  
46 *Analyses Using Data-Dependent and Independent Acquisition*. Proteomics,  
47 2018. **18**(12): p. e1700246.
- 48 59. Basham, T.Y., et al., *Interferon increases HLA synthesis in melanoma cells:*  
49 *interferon-resistant and -sensitive cell lines*. Proc Natl Acad Sci U S A, 1982.  
50 **79**(10): p. 3265-9.



- 1 60. Tumeh, P.C., et al., *PD-1 blockade induces responses by inhibiting adaptive*  
2 *immune resistance*. Nature, 2014. **515**(7528): p. 568-71.
- 3 61. Liepe, J., et al., *The 20S proteasome splicing activity discovered by SpliceMet*.  
4 PLoS Comput Biol, 2010. **6**(6): p. e1000830.
- 5

1 **Figure legends:**

2 *Figure 1: Experimental Workflow & consensus-binding motifs*

3 (A) Peptides presented by HLA class I molecules were isolated from melanoma cells,  
4 prior to or after treatment with IFN $\gamma$ , by affinity chromatography using the antibodies  
5 DT9 and W632. The peptides were fractionated by RP-HPLC and analyzed on a  
6 QExactive Plus mass spectrometer (Thermo Scientific) operated in data-dependent  
7 acquisition (DDA) mode. Peptide sequences were obtained using PEAKS 8.5  
8 (Bioinformatics Solutions) in combination with “Hybrid finder” to determine possible  
9 *cis*-spliced peptides[14] and a spectral library was created in Spectronaut 11 Pulsar  
10 (Biognosys). To identify quantitative differences in the immunopeptidome prior to or  
11 after treatment with IFN $\gamma$ , the remaining DT9 and W632 eluates were pooled and  
12 analyzed by data-independent acquisition (DIA) mass spectrometry on a QExactive  
13 Plus mass spectrometer (Thermo Scientific). Data were imported and analyzed with  
14 Spectronaut 11 Pulsar (Biognosys).

15 (B) During proteolysis, the proteasome generates short linear peptides through  
16 hydrolysis of the peptide bonds. These peptides directly match the proteome.  
17 Alternatively, transpeptidation reactions can generate peptides which do not have a  
18 template in the genome. Such spliced peptides could originate from one (*cis*-spliced)  
19 or two (trans-spliced) distinct proteins.

20 (C) Consensus-binding motifs were generated for the identified linear and *cis*-spliced  
21 nonameric peptides. Note, de-novo sequencing cannot distinguish between leucine  
22 and isoleucine and therefore, L represents either a leucine or an isoleucine residue in  
23 case of the *cis*-spliced peptide motif.

24

25 *Figure 2: Exposure to IFN $\gamma$  largely alters the presented immunopeptidome*

1 (A) The Venn diagram shows the overlap in the peptide identifications between the 2  
2 analyzed conditions (prior to or after treatment with IFN $\gamma$ ).

3 (B) The log<sub>2</sub> fold changes of all linear and cis-spliced peptides are shown as violin  
4 plots.

5

6 *Figure 3: Identified cancer-specific peptides*

7 (A) The number of identified linear or *cis*-spliced peptides derived from cancer-  
8 related proteins are shown. (B) The number of novel or previously described peptides  
9 identified, and the cancer-related proteins they are derived from is shown. (C) The  
10 number of previously reported, novel, or *cis*-spliced, cancer specific peptides were  
11 graphed based on their presence in IFN $\gamma$  treated or untreated samples exclusively, or  
12 in both conditions.

13

14 *Figure 4: Immunogenicity of identified melanoma-associated epitopes*

15 Selected melanoma-associated peptides were pooled and incubated at 10  $\mu$ M final  
16 concentration with PBMC from healthy donors (n=4) or melanoma patients (n=6) for  
17 10 days in presence of IL-2. All patients were HLA-A2<sup>+</sup>, with the exception of  
18 Melanoma patient 6, which was a HLA-A2<sup>-</sup> control. On day 10, CD8<sup>+</sup> T lymphocytes  
19 were re-stimulated with the individual peptides, or pools of those peptides which were  
20 up/down regulated or unchanged with IFN $\gamma$  as indicated, in presence of brefeldin A.  
21 Cells were labeled with fluorescent antibodies for surface (CD3, CD8) and  
22 intracellular (TNF $\alpha$ ) proteins, and analysed by flow cytometry. Data show the  
23 percentage of TNF $\alpha$ <sup>+</sup> CD8<sup>+</sup> T lymphocytes in response to each peptide combined (A)  
24 or as individual values (B). Representative plots from melanoma patient 2 are shown  
25 for negative (DMSO) and positive (FEC) controls, and 2 positive and 1 negative

1 peptide responses (C). \* denotes peptides with the highest *in silico* predicted  
2 immunogenicity.

3

4 *Figure 5: Immunoproteasome expression is associated with survival benefit in*  
5 *melanoma patients*

6 Using the TCGA-SKCM and FM-AD datasets looking at nevi and melanomas, the top  
7 and bottom quartiles of samples expressing IP or cP subunits were plotted on a  
8 Kaplan Meier survival curve ([www.onclnk.org](http://www.onclnk.org)).

9

10 *Figure 6: Immunogenicity of cis-spliced peptide pools*

11 PBMCs from 5 melanoma patients and 4 healthy donors (HD) were stimulated with  
12 pooled peptides (n=8-9) for 10 days in the presence of Il-2. Cells were re-stimulated  
13 for 8 hours in the presence of BFA and TNF $\alpha$  expression measured by ICS. DMSO  
14 and FEC served as negative or positive control respectively (A). Example of gating  
15 strategy and results for patient 2 (B).

16

17 *Figure 7: Immunogenic cis-spliced peptides are HLA-A2 binders*

18 Sequence of peptides in each pool (A). PBMCs from the same patients and donors pre-  
19 stimulated with the pooled peptides as in Figure 6 were re-stimulated with single  
20 peptides from the same pool after 12 days for 8 hours in the presence of BFA and  
21 TNF $\alpha$  expression measured by ICS. DMSO and FEC served as negative or positive  
22 control respectively (B). All peptides that stimulated CD8<sup>+</sup> T cells as measured by  
23 TNF $\alpha$  to a higher degree than DMSO in at least 1 patient plus some randomly picked  
24 cis-spliced peptides were subjected to HLA-A2 stabilization assays on T2 cells as  
25 described in M&M. None HLA-A2 binding peptides (B7) or the Melan-A modified

1 HLA-A2 epitope served as negative and positive control respectively.\* denotes  
2 immunogenic peptides.

3

4

1 **Supplementary Figures:**

2

3 *Supplementary Figure 1: Peptide length*

4 (A) A pie chart showing the proportion of linear vs. *cis*-spliced peptides. Approx. 6%  
5 of the identified 30,120 peptides represent *cis*-spliced peptides. (B) Length  
6 distribution of the identified linear and *cis*-spliced peptides.

7

8 *Supplementary Figure 2: iRT retention time predictor*

9 (A) The table lists the 11 iRT peptides including their published iRT values [27]. For  
10 each iRT peptide, the observed retention time (in minutes) was averaged across the 4  
11 DDA runs and the corresponding standard deviation was calculated.

12 (B) The graph shows the correlation between the published iRT values of the 11 iRT  
13 peptides[27] and their averaged retention times (in minutes) across the 4 DDA runs.  
14 As expected, a very strong, linear correlation ( $R^2 = 0.9824$ ) was observed. Error bars  
15 represent standard deviations.

16 (C) The graph shows the correlation between the published iRT values of the 11 iRT  
17 peptides[27] and their observed retention times (in minutes) in the 2 DIA runs.

18

19 *Supplementary Figure 3: Multiple charge states*

20 Independent quantitative information was obtained for 439 peptides, which had both  
21 doubly and triply charged precursor ions. To assess the quantitative accuracy of our  
22 dataset, we plotted for each peptide the obtained log<sub>2</sub> fold change of each charge  
23 state, which resulted in near identical quantitative results.

24

25

1 *Supplementary Figure 4*

2 Using the TCGA-SKCM and FM-AD datasets looking at nevi and melanomas, the top  
3 and bottom quartiles of samples expressing IP or cP subunits, and CD3g were  
4 identified, and the top quartile of the CD3g expressing samples were removed. The  
5 remainder of the top and bottom quartiles of samples expressing IP or cP subunits  
6 were plotted on a Kaplan Meier survival curve ([astatsa.com/LogRankTest/](http://astatsa.com/LogRankTest/)).

7

- 1 **Supplementary Tables:**
- 2 **Table 1: All linear and cis-spliced peptides identified**
- 3 **Table 2: NetMHCpan predicted class I binders from LM-MEL-44 HLAs**
- 4 **Table 3: mutated peptides based on LM-MEL-44 sequencing data**
- 5 **Table 4: DIA-MS quantified 9799 peptides**
- 6 **Table 5: 96 MAAs**
- 7 **Table 6: linear peptides tested in immunogenicity assay**
- 8
- 9



FIGURE 1

A

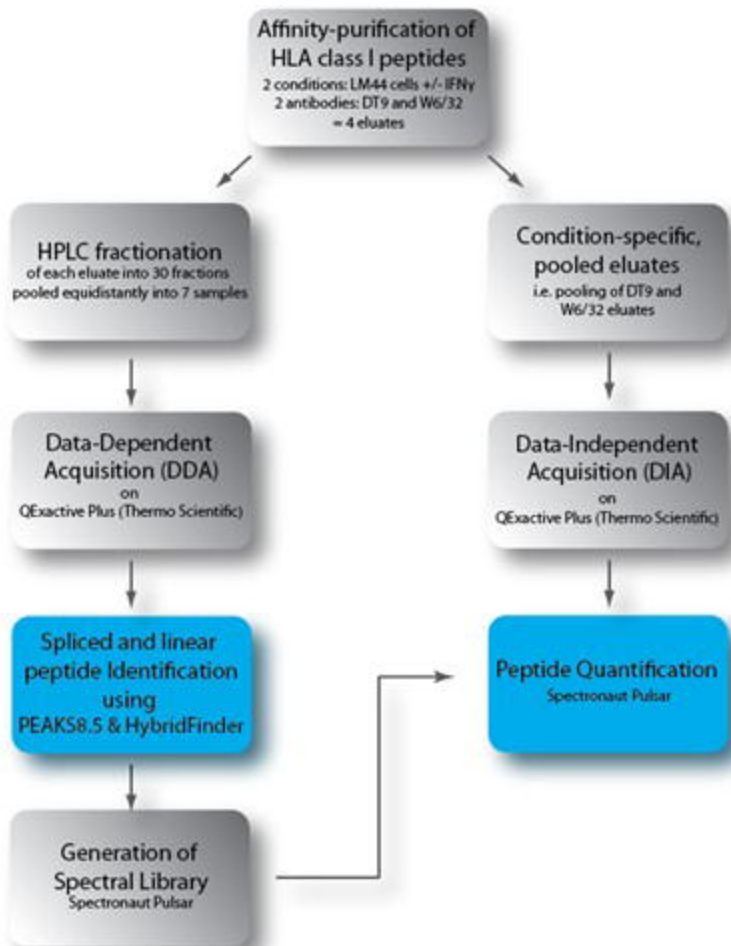

B

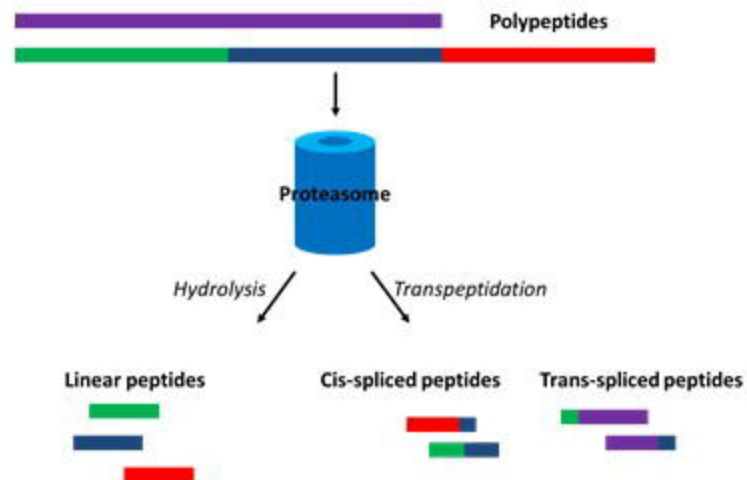

C

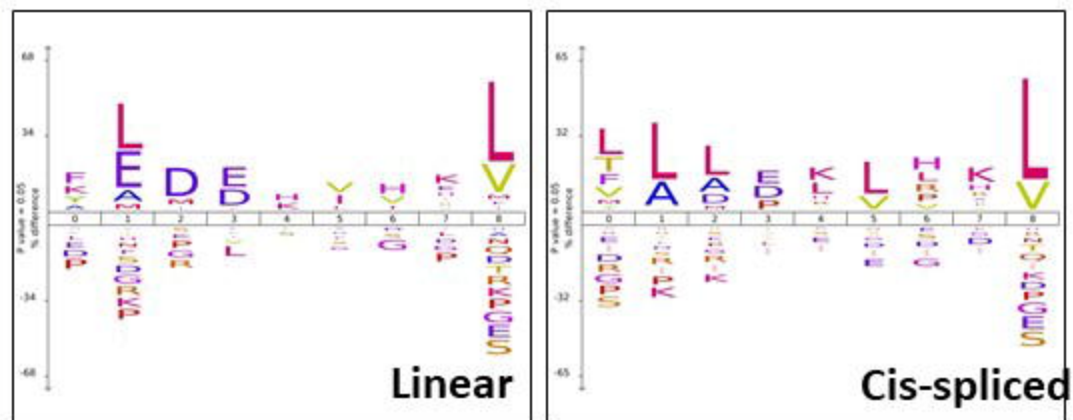

FIGURE 2

A

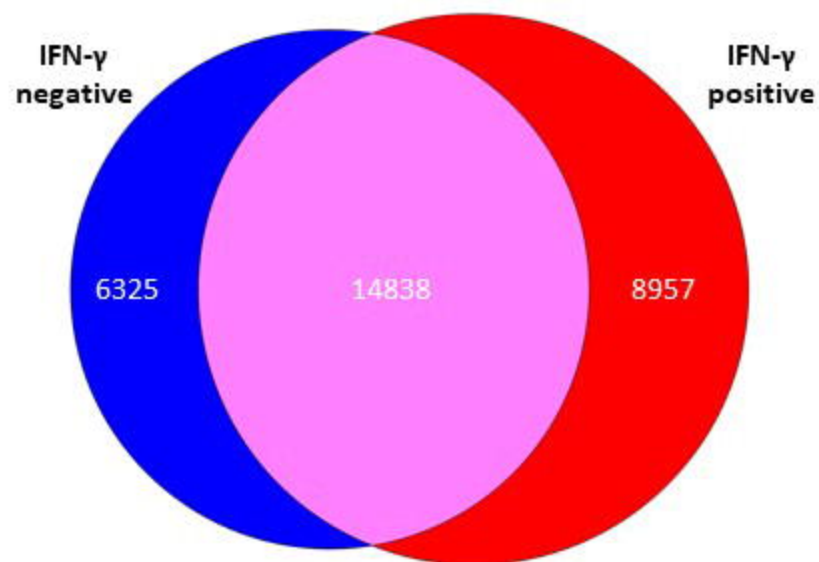

B

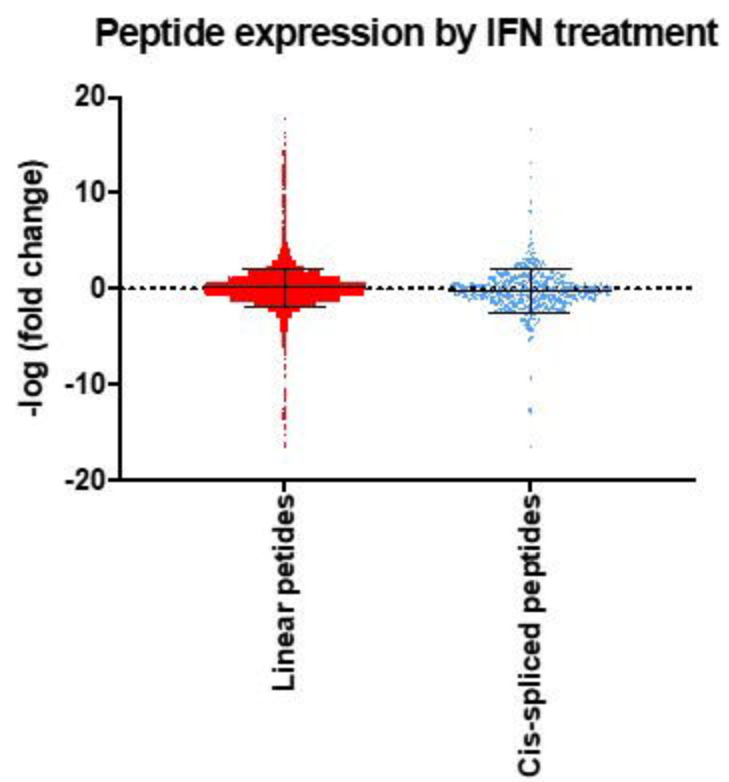

Figure 3

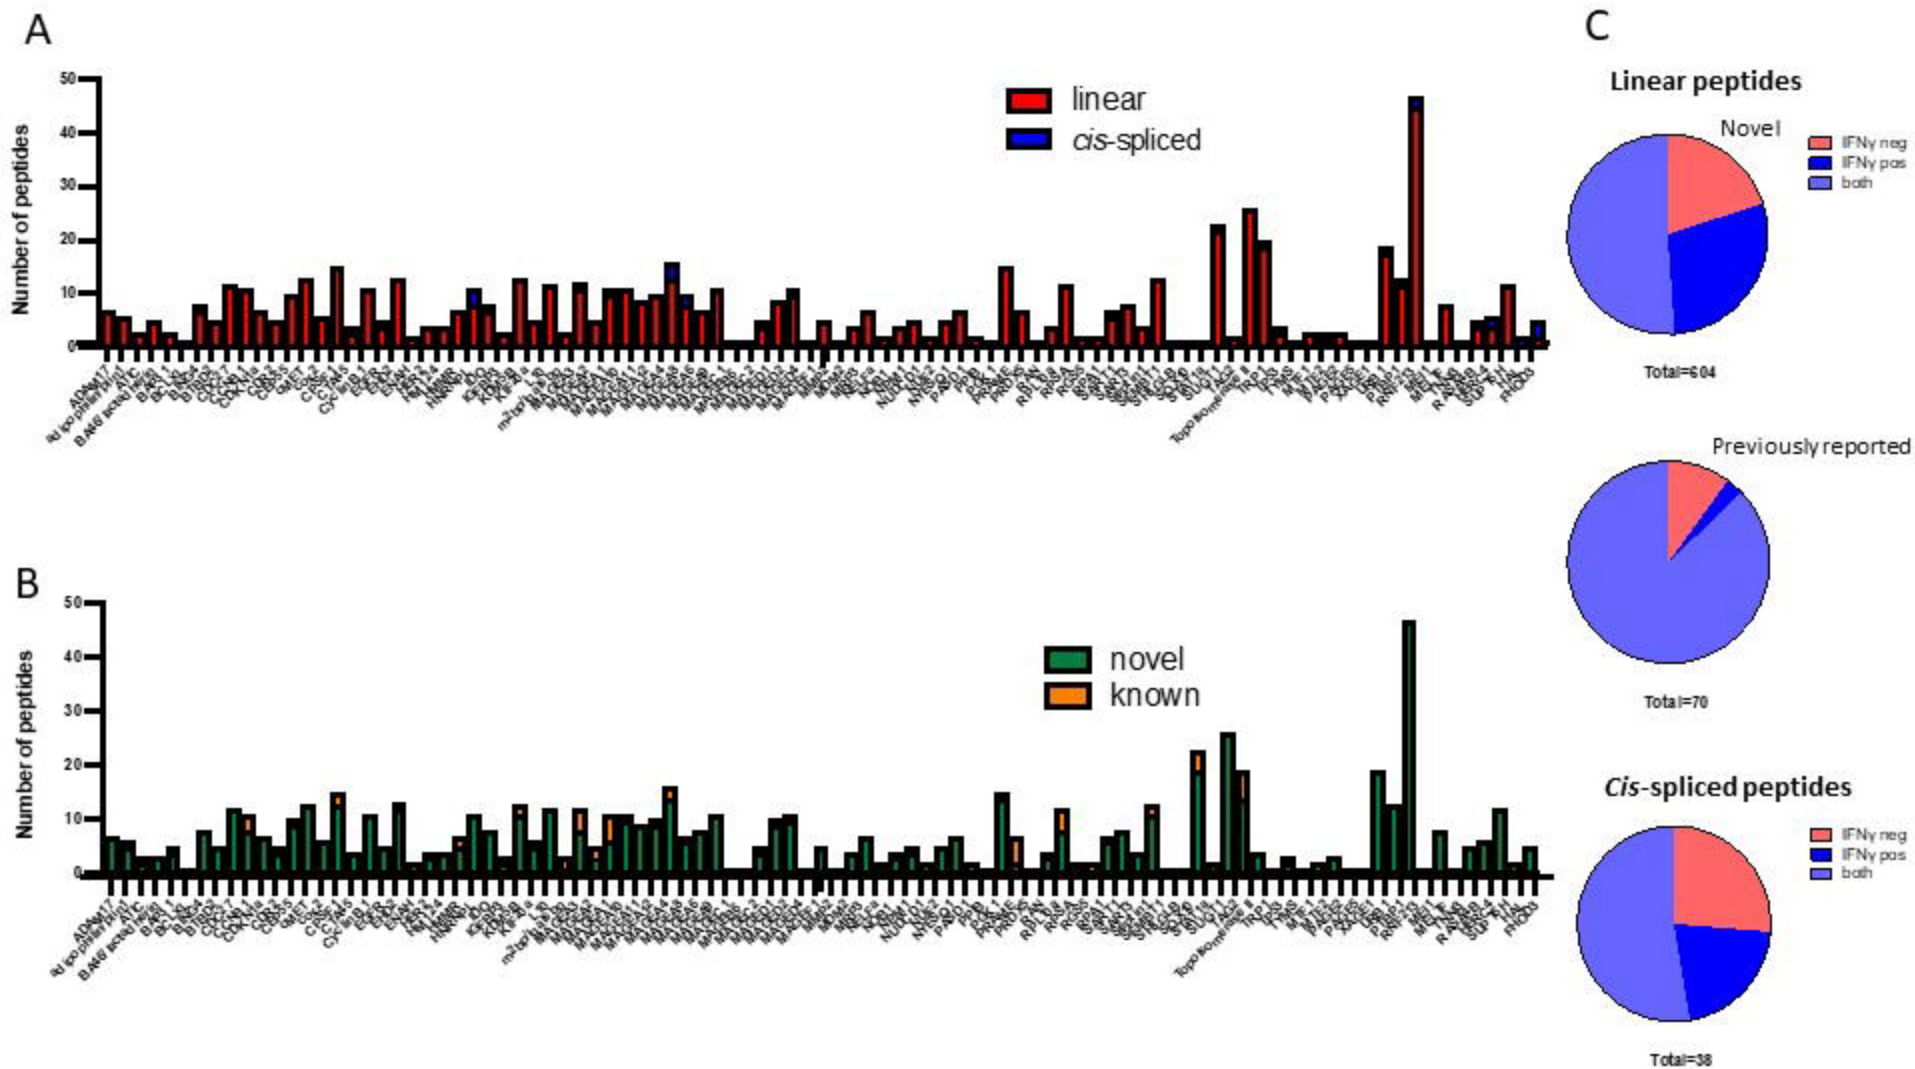

Figure 4

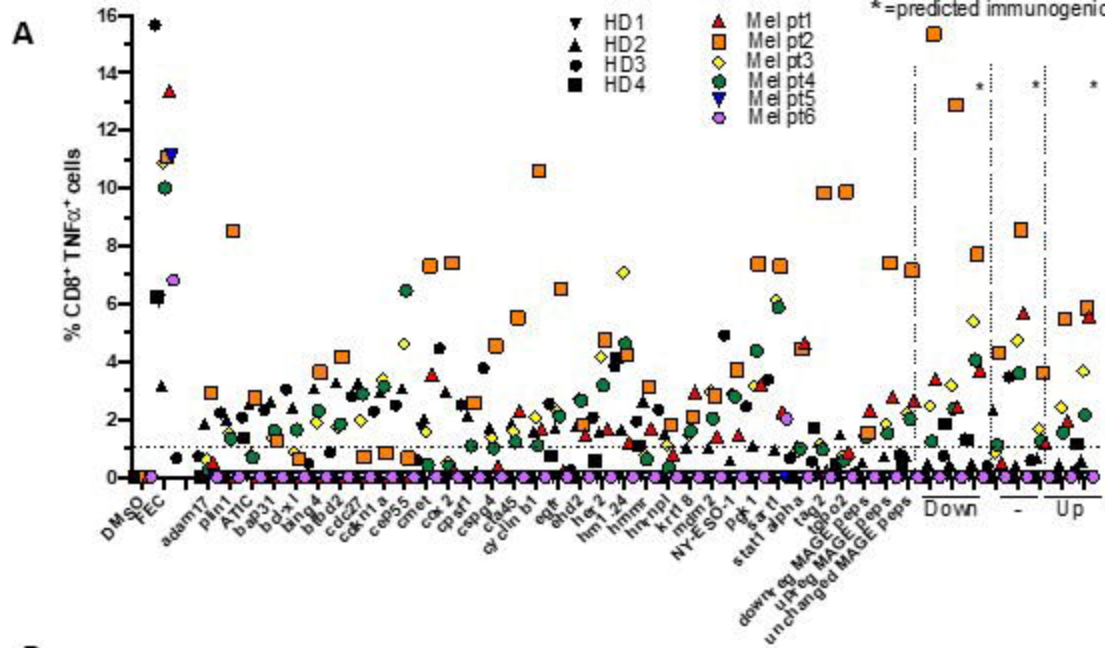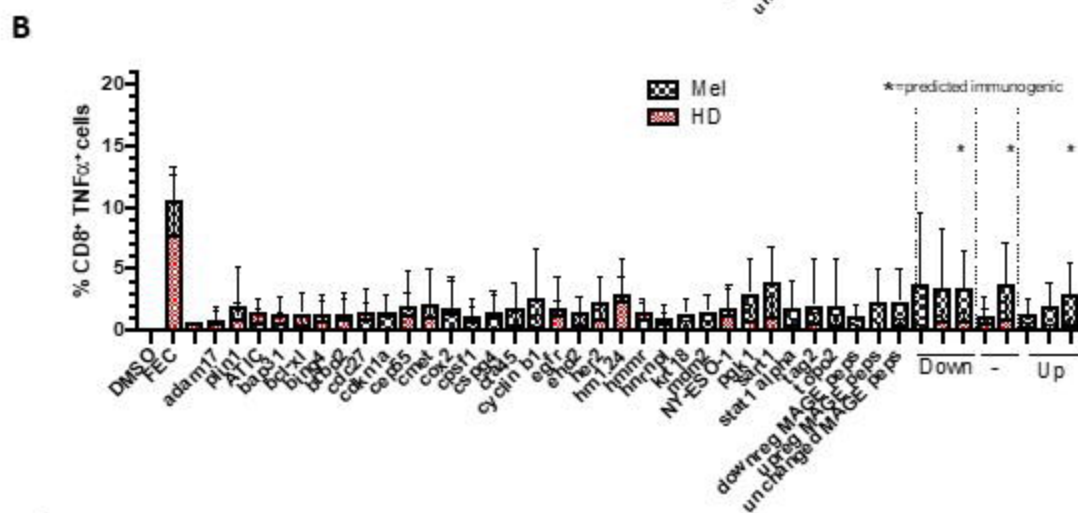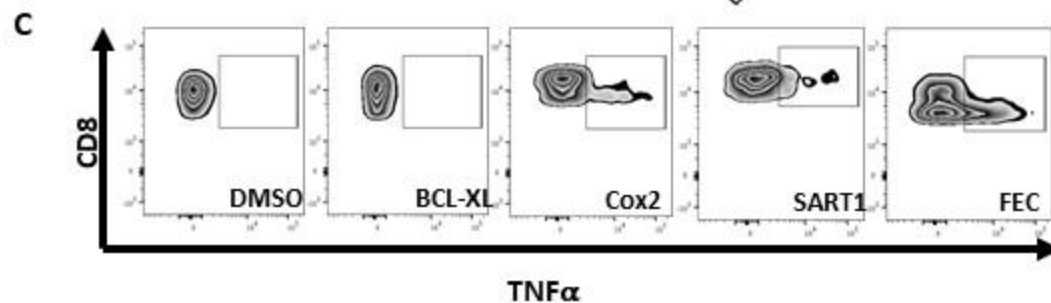

Figure 5

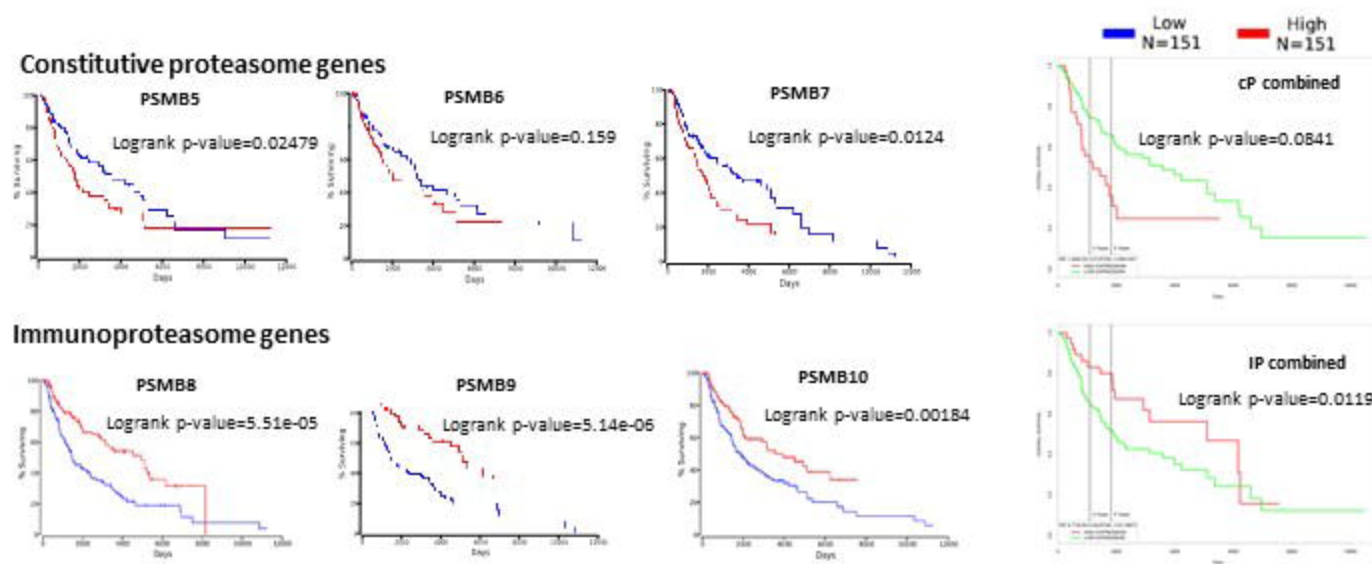

Figure 6

A

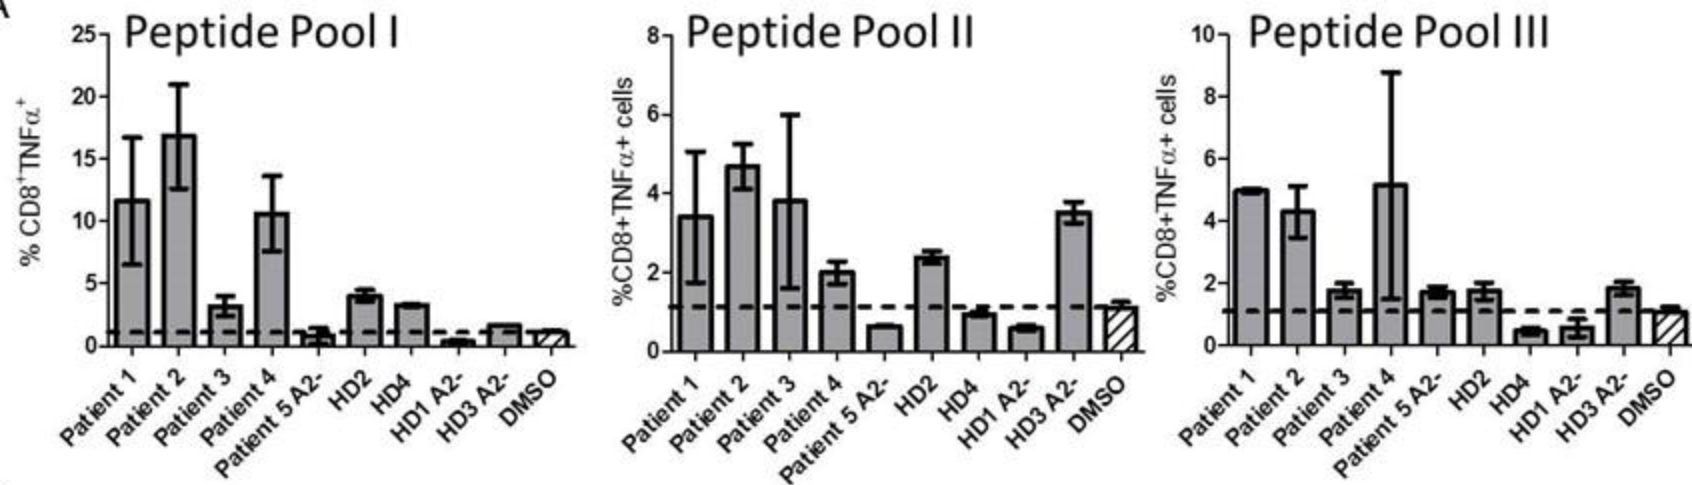

B

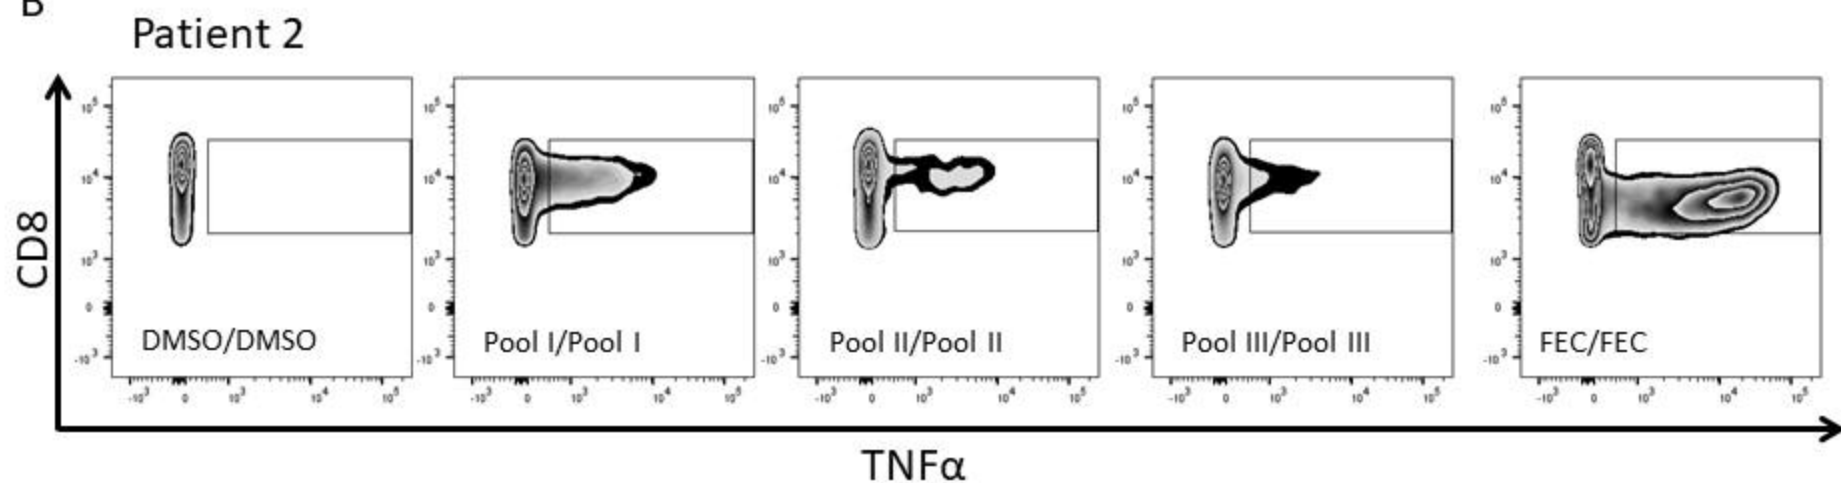



**Figure 7****A**

| Pool I            | Pool II          | Pool III          |
|-------------------|------------------|-------------------|
| FIMDKHFSV         | FIIHPLLL         | VLDEVVVH          |
| FLWEILERL         | VALEHVVRV        | VTDFLSHL          |
| KLLILELHV (1829)* | LLSLLPAL (1841)* | LLALRILSL         |
| LIASFLDKV         | LLSLLPAI (1842)* | LLAIRLISI         |
| AIMTAVVKI         | ILSLIPAL (1843)* | LLALRLLSL         |
| LILGLLTKV (1832)* | LLSLLPAL         | LLLPLHEVL         |
| VLTDILHTL         | LAIQLKTL         | LLLEALEQL (1860)* |
| KLTSLNIV          | EEVPAAESRKY      | LVPPPPPLL         |
| MLTEKQHLL         | VADLQRTL         |                   |

\*denotes immunogenicity based on CD8<sup>+</sup>/TNF $\alpha$ <sup>+</sup> in at least 1 assay

**B**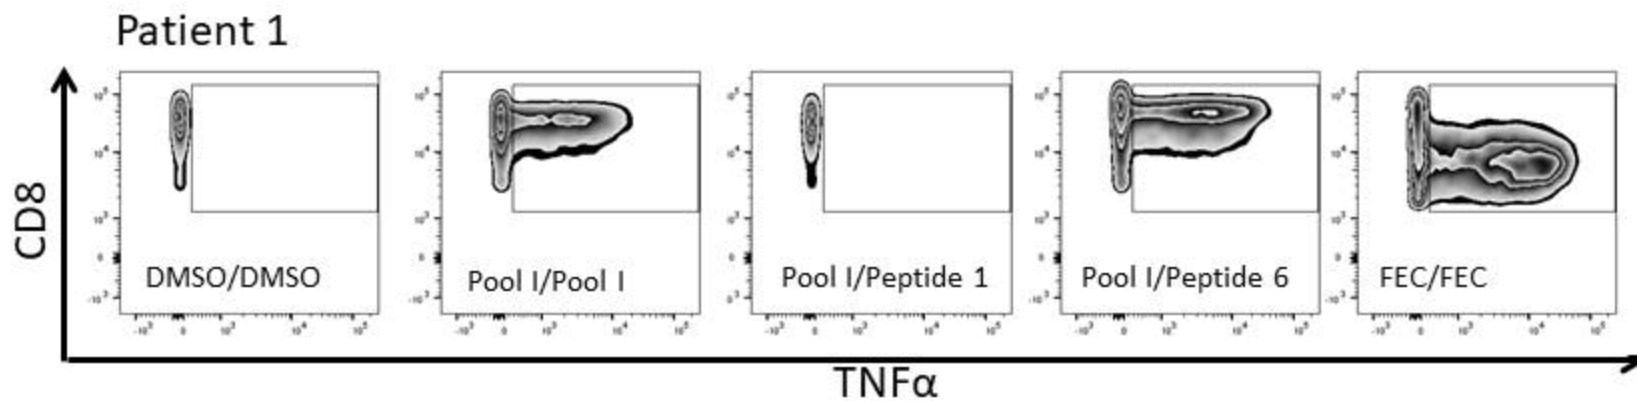**C**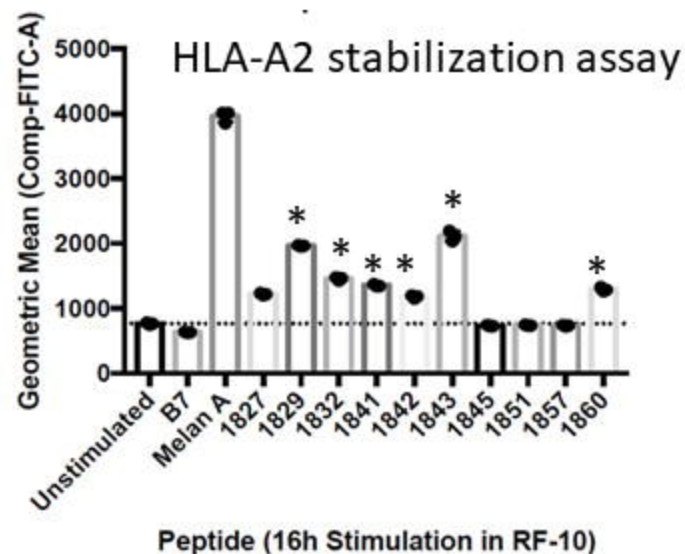

# SUPPLEMENTARY FIGURE 1

A

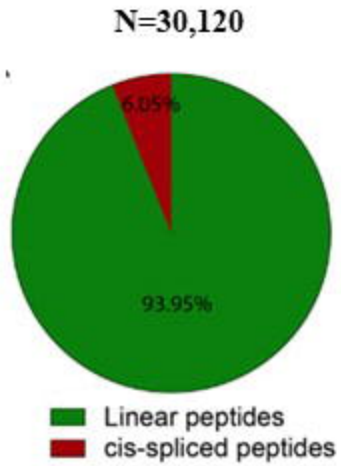

B

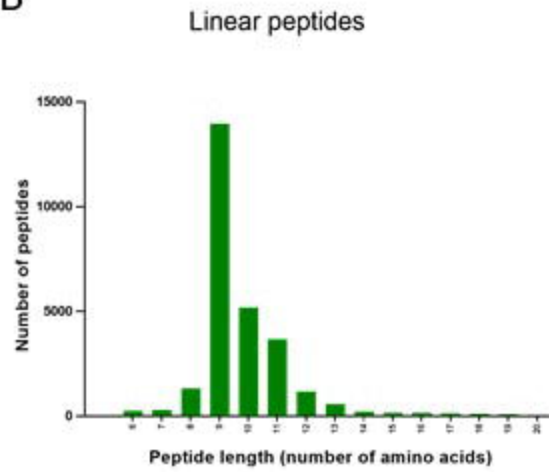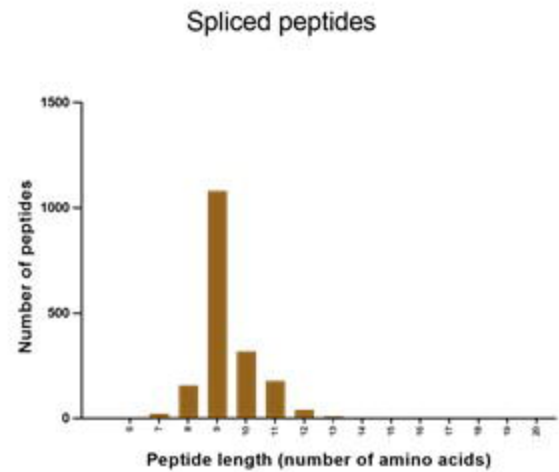



# SUPPLEMENTARY FIGURE 2

## A

iRT retention time predictor

| Peptide | Sequence       | iRT value <sup>1</sup> | RT [min] | StDev            |
|---------|----------------|------------------------|----------|------------------|
| iRT-A   | LGGNEQVTR      | -24.92                 | 19.76    | 0.11             |
| iRT-B   | GAGSSEPVTGLDAK | 0.00                   | 23.91    | 0.13             |
| iRT-C   | VEATFGVDESSNAK | 12.39                  | 26.99    | 0.05             |
| iRT-D   | YILAGVENSK     | 19.79                  | 28.76    | 0.05             |
| iRT-E   | TPVISGGPYEYR   | 28.71                  | 30.36    | 0.05             |
| iRT-F   | TPVITGAPYEYR   | 33.38                  | 31.25    | 0.03             |
| iRT-G   | DGLDAASYAPVR   | 42.26                  | 37.09    | 1.4 <sup>7</sup> |
| iRT-H   | ADVTPADDFSEWSK | 54.62                  | 38.04    | 0.2              |
| iRT-I   | GTFIIDPGGVIR   | 70.52                  | 40.85    | 0.0              |
| iRT-K   | GTFIIDPAAVIR   | 87.23                  | 44.51    | 0.0              |
| iRT-L   | LFLQFGAQGSPFLK | 100.00                 | 46.46    | 0.0              |

## B

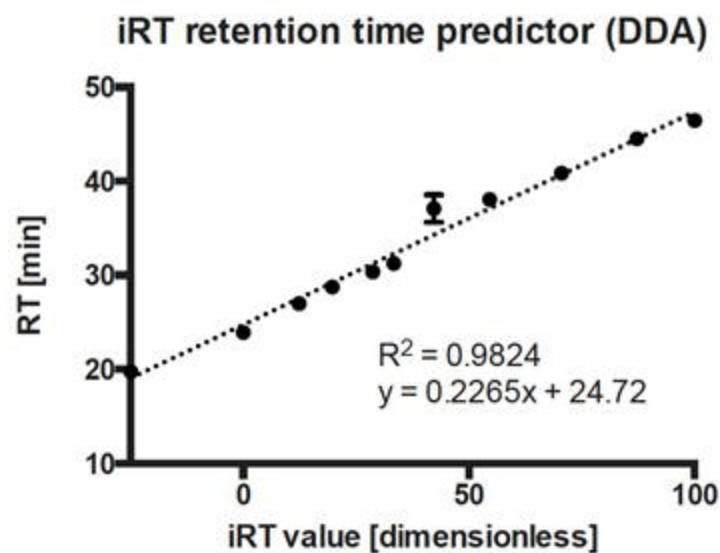

## C

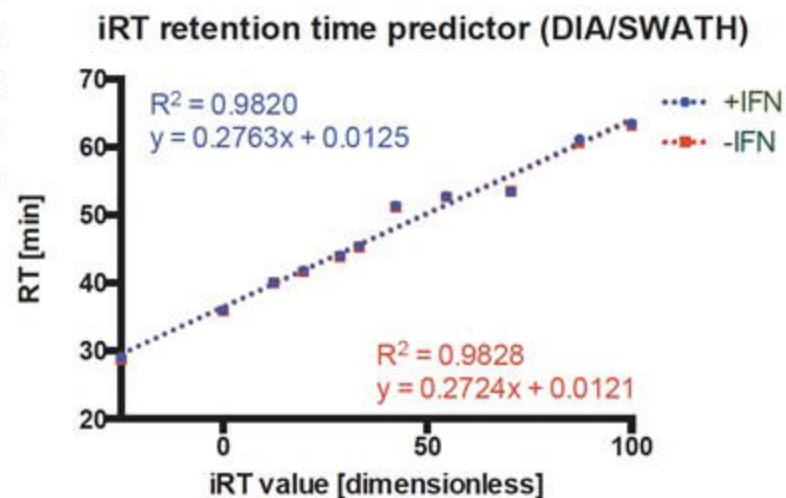

Supplementary Figure 3

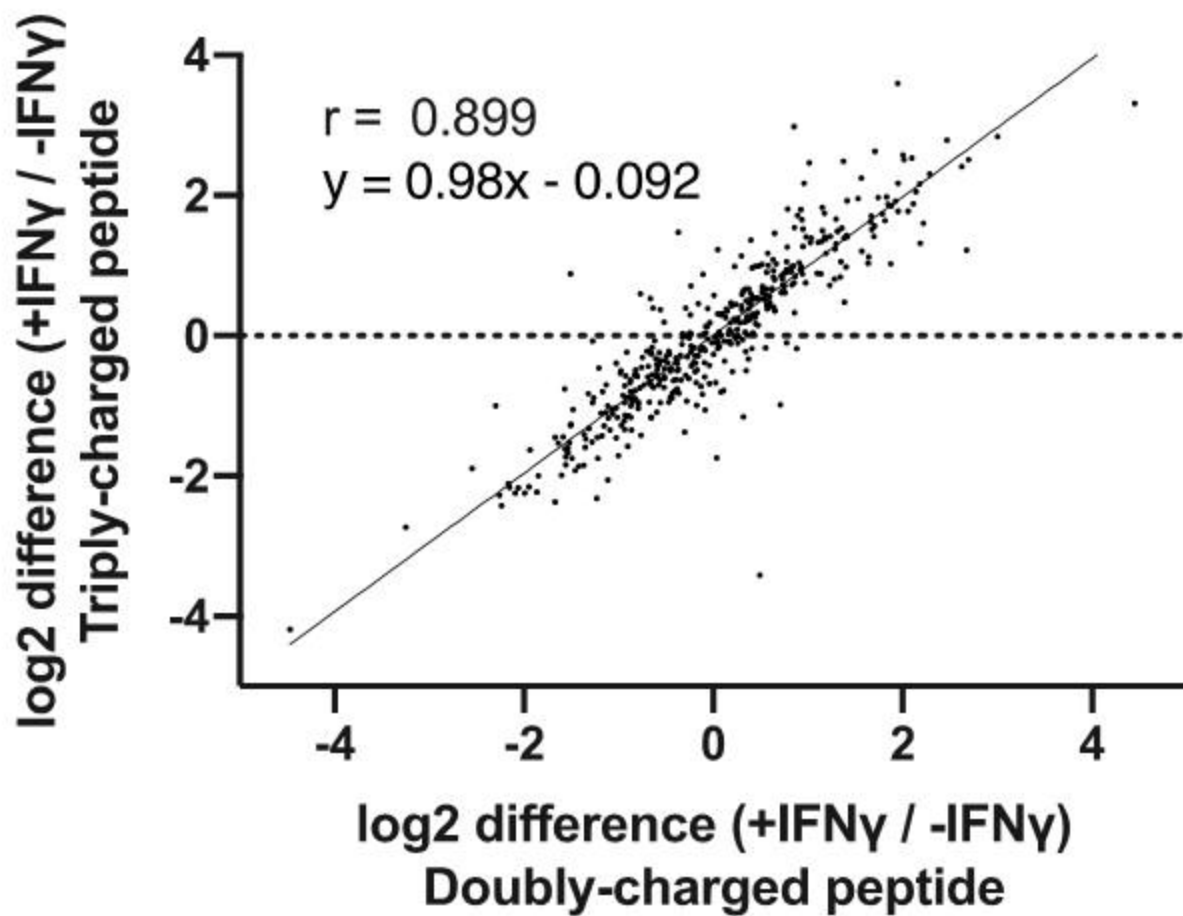

# Supplementary Figure 4

## Constitutive proteasome genes – top quartile of CD3 expressing samples removed

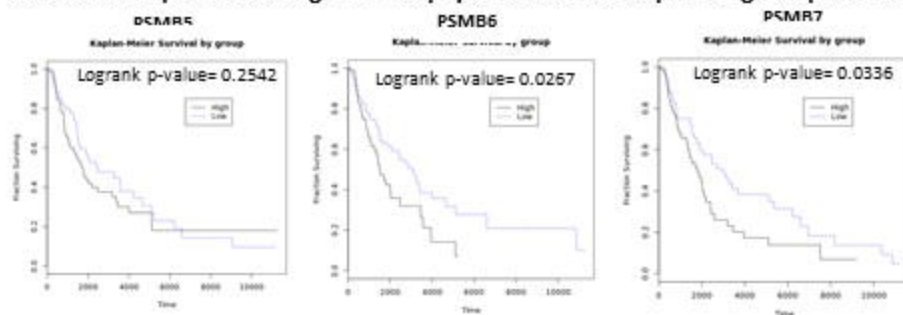

## Immunoproteasome genes – top quartile of CD3 expressing samples removed

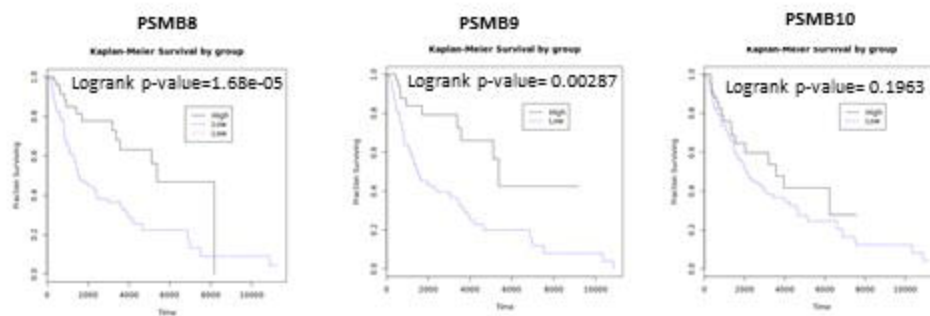

Source: https://www.biorxiv.org/content/10.1101/623223v1.full.pdf
