1           **Spliced peptides and cytokine driven changes in the**  
2                                   **immuno-peptidome of melanoma**

3  
4   Pouya Faridi<sup>1,9</sup>, Katherine Woods<sup>2,3,9</sup>, Simone Ostrouska<sup>2,3</sup>, Cyril Deceneux<sup>2,3</sup>,  
5   Ritchlynn Aranha<sup>1</sup>, Divya Duscharla<sup>1</sup>, Stephen Q. Wong<sup>4,5</sup>, Weisan Chen<sup>6</sup>, Sri  
6   Ramarathinam<sup>1</sup>, Terry C.C. Lim Kam Sian<sup>1</sup>, Nathan P. Croft<sup>1</sup>, Chen Li<sup>1,7</sup>, Rochelle  
7   Ayala<sup>1</sup>, Jonathan Cebon<sup>2,3</sup>, Anthony W. Purcell<sup>1\*</sup>, Ralf B. Schittenhelm<sup>1,8\*</sup>, Andreas  
8   Behren<sup>2,3\*</sup>

9   <sup>1</sup>Department of Biochemistry and Molecular Biology and Infection and Immunity  
10   Program, Monash Biomedicine Discovery Institute, Monash University, Clayton,  
11   Victoria, Australia.

12   <sup>2</sup>Cancer Immunobiology, Olivia Newton-John Cancer Research Institute, Austin  
13   Hospital, Heidelberg, Victoria, Australia.

14   <sup>3</sup>School of Cancer Medicine, La Trobe University, Bundoora, Victoria, Australia.

15   <sup>4</sup>Cancer Research Division, Peter MacCallum Cancer Centre, Melbourne, Victoria,  
16   Australia.

17   <sup>5</sup>Department of Pathology, Peter MacCallum Cancer Centre, Melbourne, Victoria,  
18   Australia.

19   <sup>6</sup>Department of Biochemistry and Genetics, La Trobe Institute for Molecular Science,  
20   La Trobe University, Melbourne, Victoria, Australia.

21   <sup>7</sup>Current Address: Department of Biology, Institute of Molecular Systems Biology,  
22   ETH Zürich, Switzerland.

23   <sup>8</sup>Monash Proteomics & Metabolomics Facility, Monash Biomedicine Discovery  
24   Institute, Monash University, Clayton, Victoria, Australia.

25   <sup>9</sup>These authors contributed equally

1 \*corresponding authors: [Andreas.behren@onjcri.org.au](mailto:Andreas.behren@onjcri.org.au);  
2 [ralf.schittenhelm@monash.edu.au](mailto:ralf.schittenhelm@monash.edu.au) and [anthony.purcell@monash.edu](mailto:anthony.purcell@monash.edu)

3 The authors declare no potential conflicts of interest

4

5 **Running title: Spliced and linear HLA-I peptides in melanoma.**

6

7 **Keywords:** Immunopeptidome, Immunoproteasome, Transpeptidation, CD8<sup>+</sup> T cells,  
8 Post-translational splicing, Melanoma, Antigen processing, IFN $\gamma$ , Inflammation,  
9 HLA, Immunotherapy.

10

## 11 **Summary**

12 Antigen-recognition by CD8<sup>+</sup> T cells is governed by the pool of peptide antigens  
13 presented on the cell surface in the context of HLA class I complexes. Recent studies  
14 have shown not only a high degree of plasticity in the immunopeptidome, but also that  
15 a considerable fraction of all presented peptides is generated through proteasome-  
16 mediated splicing of non-contiguous regions of proteins to form novel peptide  
17 antigens. Here we used high-resolution mass-spectrometry combined with new  
18 bioinformatic approaches to characterize the immunopeptidome of melanoma cells in  
19 the presence or absence of interferon- $\gamma$ . In total, we identified more than 60,000  
20 peptides from a single patient derived cell line (LM-MEL-44) and demonstrated that  
21 interferon- $\gamma$  induced marked changes in the peptidome with an overlap of only ~50%  
22 between basal and treated cells. Around 6-8% of the peptides were identified as *cis*-  
23 spliced peptides, and 2213 peptides (1827 linear, 386 *cis*-spliced peptides) were  
24 derived from known melanoma-associated antigens. These peptide antigens were  
25 equally distributed between the constitutive and interferon- $\gamma$  induced peptidome. We

1 next examined additional HLA-matched patient derived cell lines to investigate how  
2 frequently these peptides were identified and found that a high proportion of both  
3 linear and spliced peptides were conserved between individual patient tumors,  
4 drawing on data amassing to over 100,000 peptide sequences from these extended  
5 data sets. Moreover, several of these peptides showed *in vitro* immunogenicity across  
6 multiple melanoma patients. These observations highlight the breadth and complexity  
7 of the repertoire of immunogenic peptides that can be exploited therapeutically and  
8 suggest that spliced peptides are a major new class of tumor antigens.

9

10

1 **Introduction:**

2 Antigen recognition by cytotoxic T cells and subsequent tumor cell destruction is the  
3 key component underlying cancer immunotherapy strategies. Its importance has been  
4 widely demonstrated, and loss-of-function of elements in the antigen processing and  
5 presentation pathways has been shown to confer therapeutic resistance(1). Correlative  
6 findings point to neo-antigens arising from tumor mutations as an important source of  
7 immunogenic antigens in the context of melanoma and other cancers(2). Nonetheless,  
8 tumors with low mutational burdens can respond to checkpoint inhibitor therapy, and  
9 the presence of a high tumor-mutational load does not necessarily correspond to the  
10 efficacy of treatment(3). The human leukocyte antigen (HLA) class I-bound peptides  
11 (*p*-HLA-I) arising from the mutant proteins are mostly heterogeneously expressed and  
12 additionally determined by the patient-specific HLA-subtypes, making predictions  
13 about their presentation and immunogenicity unreliable. While a number of recent  
14 studies have reported the utility of mass spectrometry combined with exome  
15 sequencing in identifying HLA-presented peptides derived from mutated proteins(4-  
16 6), the analysis of the contribution of mutational neoantigens to the overall tumor  
17 immunogenicity remains complicated and unresolved.

18 Against this background, the composition of the immunopeptidome, or the repertoire  
19 of HLA-bound peptides presented on the surface of the cell and their contribution to  
20 tumor immune recognition, becomes significant. The immunopeptidome is largely  
21 shaped by antigen processing through the proteasome complex for subsequent  
22 presentation of short peptide epitopes on MHC molecules(7). Several forms of the  
23 proteasome complex exist, each with differing enzymatic activities(8). In melanoma  
24 cells, the constitutive proteasome is expressed under steady state conditions. The  
25 expression of an immunoproteasome, the subtype expressed by dendritic cells and

1 other cells of the immune system, may be induced in tumor cells in a cytokine-  
2 dependant manner (9), leading ultimately to changes in the peptides presented to the  
3 immune system(10,11). We have previously demonstrated induction of the  
4 immunoproteasome in a range of human melanoma cell lines in the presence of the  
5 inflammatory cytokine IFN $\gamma$  *in vitro*, and in melanoma patient inflamed tumors  
6 (characterized by presence of tumor infiltrating lymphocytes (TILs)) *ex vivo*(12).  
7 Dependant on the proteasome subtype expressed by the cell, we have shown that a  
8 single melanoma antigen (NY-ESO-1) can be processed into several different  
9 epitopes. These differences in antigen processing led to concomitant change in the  
10 ability of antigen specific T cells to target the tumor cell. Thus, the potential for a  
11 tumor cell to ‘look’ substantially different to CD8<sup>+</sup> T cells, depending on  
12 inflammation at the tumor site, arises. Moreover, recent studies by ourselves and  
13 others(13,14) have shown that a significant proportion of *p*-HLA-I are not  
14 genomically templated and result from post-translational proteasome splicing (ligation  
15 of non-contiguous small polypeptide segments from the same or different proteins).  
16 To date, these peptides have been missed in most neoantigen discovery studies due to  
17 the lack of appropriate bioinformatics tools(15,16).  
18 In this study we have used high resolution mass spectrometry approaches combined  
19 with a novel bioinformatics workflow to identify linear and spliced *p*-HLA-I  
20 presented in the melanoma immunopeptidome in the presence or absence of the  
21 cytokine IFN $\gamma$ . These included a number of linear and *cis*-spliced peptides derived  
22 from melanoma-associated antigens. A series of identified linear and *cis*-spliced  
23 peptides were tested for *in vitro* immunogenicity across multiple melanoma patients  
24 and healthy donors. While the peptide repertoire changed significantly,  
25 immunogenicity of selected peptide pools from different treatment conditions (+/-

1 IFN $\gamma$ ) *in vitro* did not change across melanoma patients. However, T lymphocyte  
2 responses to pools of IFN $\gamma$  upregulated peptides were not seen in healthy donors. We  
3 also demonstrate that *cis*-spliced peptides were widely presented by melanoma cells  
4 and immunogenic in multiple donors. These findings have significant implications for  
5 cancer immunotherapy as well as for fundamental questions such as induction of  
6 immune-tolerance, T cell repertoires and immune recognition.

7

1 **Results:**

2 *The melanoma immunopeptidome is composed of linear and spliced peptides*

3 We have established a comprehensive repository of HLA class I peptide ligands  
4 presented by a patient derived melanoma cell line (LM-MEL-44) utilizing either the  
5 constitutive proteasome (-IFN- $\gamma$ ) or the immunoproteasome (+IFN- $\gamma$ ). Using three  
6 biological replicates for each condition, we identified around 60,000 peptides  
7 presented across all HLA class I allotypes expressed by LM-MEL-44 cells (Table S1).  
8 Approximately 6-8% of the peptides in each sample were conservatively assigned as  
9 *cis*-spliced in origin (Fig. 1A, Table S1), being derived from non-contiguous  
10 sequences of the same protein. This proportion of peptides of *cis*-spliced origin is in  
11 agreement with previous studies (14,17,18). As expected for HLA class I epitopes, the  
12 majority of peptides were 9 amino acids in length with no apparent difference  
13 between linear and *cis*-spliced sequences (Fig.1B).

14 Using NetMHC 4.0 binding prediction algorithm, more than 80% of the linear  
15 peptides were assigned to at least one of the HLA class I alleles expressed on the  
16 surface of the LM-MEL-44 cells (HLA-A\*02:01, B\*40:01/\*44:02,  
17 C\*03:04/\*05:01)(19) suggesting that the majority of the identified peptide sequences  
18 can be considered genuine HLA class I ligands (Fig. 1C, Table S2). The percentage of  
19 *cis*-spliced peptides predicted to bind to HLA-A or HLA-C molecules was found to be  
20 comparable to linear epitopes, but intriguingly substantially fewer *cis*-spliced peptides  
21 were predicted to bind to HLA-B\*40:01 and HLA-B\*44:02, suggesting that LM-  
22 MEL-44 cells generate a lower number of *cis*-spliced peptides that conform to the  
23 consensus-binding motif of these HLA-B allotypes (Fig. 1C). Moreover, a  
24 significantly higher percentage of unassigned sequences was observed amongst the  
25 *cis*-spliced epitopes, which is in agreement with previous reports (13,14) and which

1 can be attributed to the fact that binding algorithms such as NetMHC 4.0 are  
2 exclusively trained on linear peptide sequences.

3 In addition, it should be noted that we did not identify in our entire dataset any of the  
4 mutational neoantigens that have been described for the LM-MEL-44 cell line based  
5 on exome sequencing data (20). However, this is not surprising as this cell line has a  
6 relatively low mutational load (Table S3).

7

### 8 *The generation of spliced peptides is not a random process*

9 To address whether spliced peptides are randomly generated, we comparatively  
10 analyzed the overlap of both linear and spliced peptides across our three biological  
11 replicates. A total of 1399 and 1795 *cis*-spliced peptides were identified in at least two  
12 of the three biological replicates for the IFN $\gamma$ -untreated and treated samples, which  
13 corresponds to 47.6% and 52.2%, respectively (Fig. 2A). Importantly, a similar  
14 overlap was observed for the linear epitopes (48.8% and 53.9%, respectively), which  
15 suggests that the generation of *cis*-spliced peptides is not a random process. Of note,  
16 the comparatively low overlap between the replicates can be rather attributed to the  
17 stochastic nature of data-dependent acquisition mass spectrometry (DDA-MS), which  
18 is particularly pronounced when acquiring highly complex samples that contain  
19 individual analytes of low abundance (such as HLA peptide samples).

20 To investigate whether the identified *cis*-spliced peptides are also expressed on other  
21 cell lines with a similar HLA signature, we analysed the cell lines LM-MEL-53 and  
22 LM-MEL-33 by DDA-MS. LM-MEL-53 cells are derived from the same patient as  
23 LM-MEL-44 cells, but from another metastasis at a different point in time (21). In  
24 contrast, LM-MEL-33 (HLA-A\*02:01/A\*03:01, B\*40:02/\*47, C\*03:04/\*06:02) cells  
25 have been isolated from a different patient that shares three HLA alleles with LM-



1 MEL-44 (21). 47% and 28% of the identified *cis*-spliced peptides from LM-MEL-44  
2 were also identified on LM-MEL-53 and LM-MEL-33 cells, respectively (Fig. 2B,  
3 Table S1), which further confirms that the generation of *cis*-spliced peptides is not a  
4 random process, but more importantly, that *cis*-spliced peptides have a significant  
5 potential for cancer immunotherapy.

6

### 7 *IFN $\gamma$ -treatment alters melanoma HLA class I immunopeptidome*

8 Considering the well-described clinical relevance of so called “hot” versus “cold”  
9 tumor microenvironments and previous work demonstrating the influence of cytokine  
10 exposure on antigen-presentation pathways (10), we wanted to examine the impact of  
11 IFN $\gamma$  exposure on the immunopeptidome. IFN $\gamma$  treatment led to the identification of a  
12 considerably higher number of HLA epitopes than that from untreated cells,  
13 consistent with the upregulation of HLA molecules at the cell surface (Fig. 3A, Fig.  
14 S1) (10). Moreover, for common peptides we observed, on average, an increase in  
15 peptide abundance in the cytokine treated samples. Of note, only 44.7% of the linear  
16 and 52.5% of the spliced peptides were identified under both conditions suggesting  
17 that the addition of IFN $\gamma$  significantly impacts the composition of the  
18 immunopeptidome.

19 To understand whether IFN $\gamma$  exposure changes the abundance of individual epitopes  
20 independent of the HLA expression levels, we identified epitopes that were present  
21 across all replicates (a total of 4942 peptides) and calculated their log<sub>2</sub> fold change  
22 between IFN $\gamma$  treated and untreated samples after median normalization of their ms1  
23 intensities to remove any bias introduced through varying levels of IFN $\gamma$ -induced  
24 HLA expression (Fig. 3B, Table S1). A considerable number of epitopes changed in  
25 abundance by a factor of at least 2 (both up- and down), confirming that the addition

1 of IFN $\gamma$  substantially alters HLA class I presentation, while not affecting the  
2 proportion of presented *cis*-spliced epitopes on LM-MEL-44 melanoma cells.  
3 Interestingly and despite median-normalized ms1 intensities, most of the peptides  
4 predicted to bind to HLA-B\*40:01 and HLA-B\*44:02 were still upregulated upon  
5 IFN $\gamma$  exposure, which correlates to the enhanced upregulation of HLA-B molecules  
6 in response to IFN $\gamma$  compared to HLA-A and HLA-C molecules (10).

7

#### 8 *Identification of novel cancer specific peptides in the melanoma immunopeptidome*

9 Next we screened a panel of identified peptides including sequences from  
10 melanoma/cancer-associated antigens (MAA) (22,23) and tumor antigens with  
11 demonstrated immunogenicity(24-26). We identified a total of 2213 peptides in our  
12 dataset (1827 linear, 386 spliced peptides) derived from 142 different MAAs (Fig. 4A,  
13 Table S4). A large proportion (~45%) of linear peptides have not been previously  
14 reported (Fig. 4B) (24). Furthermore, almost all of those peptides generated by  
15 splicing constitute potentially novel epitopes. Of the previously reported epitopes, the  
16 majority were detected in both the presence and absence of IFN $\gamma$ , whereas >58% of  
17 novel peptides were exclusive to IFN $\gamma$  treated samples, demonstrating the importance  
18 of carefully considering experimental conditions for epitope discovery (Fig. 4C).

19

#### 20 *Melanoma patients expressing immunoproteasome genes have a survival advantage*

21 Tumor recognition *in vivo* relies on the processing and generation of cognate peptides  
22 within the tumor cells. Using OncoLnc(27), we mined gene-expression data generated  
23 by the TCGA Research Network (<http://cancergenome.nih.gov/>) for correlation of  
24 both immuno- and constitutive- proteasome-specific genes with survival in melanoma  
25 patients. We found that expression of all three immunoproteasome-specific subunits

1 was significantly associated with survival in melanoma patients. Conversely,  
2 constitutive proteasome-specific subunits were associated with decreased melanoma  
3 patient survival (Fig. S2).

4 Since immunoproteasome subunits are also expressed by immune cells, including  
5 intra-tumoral T cells that are themselves associated with better prognosis, we removed  
6 the top quartile of samples with the highest CD3 expression. Following removal of  
7 these samples, we found that a significant survival benefit, associated with 2/3  
8 immunoproteasome subunits, was maintained (Fig. 5). Furthermore, presence of the 3  
9 constitutive proteasome subunits was associated with a trend towards decreased  
10 survival. This indicates that patients whose tumors express an immunoproteasome  
11 have survival benefit which is specifically associated with this proteasome type. This  
12 effect persists, albeit to a lesser extent, when we removed to tumors that showed the  
13 highest CD45 infiltration, thus including non T cell lineage immune cells and APCs  
14 (Fig. 5). As immunoproteasome expression in tumors is largely driven by cytokine  
15 exposure it remains unclear if this is merely a footprint of a (previous) successful  
16 immune recognition or if it is part of the pre-conditions to allow for such an immune  
17 response.

18

### 19 *CD8<sup>+</sup> T lymphocytes frequently recognized novel linear melanoma-specific epitopes*

20 In this study we identified several novel linear melanoma-specific peptides predicted  
21 to be bind the HLA-allotypes presented by a tumor-derived melanoma cell line (HLA-  
22 A\*02:01, B\*40:01/\*44:02, C\*03:04/\*05:01). Importantly, this included HLA-  
23 A\*02:01, one of the most prevalent HLA-types, and therefore a common target for  
24 peptide identification and therapeutic focus. We addressed functional immunogenicity  
25 of a selection of these peptides, by using them to stimulate CD8<sup>+</sup> T lymphocytes in

1 PBMC derived from healthy donors or melanoma patients (Fig.6, Table S5). In doing  
2 these studies, selected donors were matched for at least two HLA-allotypes, (across  
3 HLA-A/B/C) and 3 melanoma patients were matched across all three. Of note, the  
4 LM-MEL-44 cell line was derived from melanoma patient 2 and, melanoma patient 6  
5 shares none of the HLA alleles from this cell line, serving as a negative control.  
6 Alongside these assays using melanoma antigen-derived peptides, we also assessed  
7 differences in functional immunogenicity of immuno- or constitutive- proteasome  
8 processed epitopes. This was done by pooling a selection of those peptides which  
9 were most strongly up- or down- regulated following IFN $\gamma$  treatment (Fig. 6A and B,  
10 Table S5). We found that though also observed in healthy donors, CD8<sup>+</sup> T  
11 lymphocyte responses to the tested peptides were more frequently seen in melanoma  
12 patients (Fig. 6A (individual) and 6B (combined donors)). Novel peptides derived  
13 from 15 of the melanoma antigens identified in our screen stimulated specific CD8<sup>+</sup> T  
14 lymphocyte responses (over 2% TNF $\alpha$ <sup>+</sup> cells) in three or more donors, demonstrating  
15 novel, functional, melanoma T cell epitopes (Fig. 6A, Table S5, S6, representative  
16 examples, Fig. S3A). Of those where a clear HLA-binding prediction could be  
17 determined, 54.5% (n=6) were predicted to bind to HLA-A\*02:01, 36.4% (n=4) to  
18 HLA-B\*44:02, and 9.1% (n=1) to HLA-C\*05:01. The strongest responses were  
19 induced by the peptides derived from SART1 (U4/U6.U5 tri-snRNP-associated  
20 protein 1) and PGK1 (Phosphoglycerate kinase 1), both of which stimulated responses  
21 in 2-7% of T lymphocytes from 4 melanoma patients. Both of these peptides were  
22 predicted to bind to HLA-A\*02:01. When a selection of peptides were pooled in  
23 groups of those up/down regulated or unchanged following IFN $\gamma$  treatment, no  
24 appreciable difference in functional immunogenicity in melanoma patients was  
25 observed between groups. One pool in each group was made on the basis of higher *in*

1 *silico*-predicted immunogenicity (www.iedb.org(28), Fig. 6A,B, asterisks). However,  
2 these groups did not display enhanced ability to activate CD8<sup>+</sup> T lymphocytes in  
3 either melanoma patients or healthy donors.

4  
5

6 *Spliced peptides are immunogenic across patients and represent novel targets for*  
7 *immunotherapy*

8 The potential implications of the presence of spliced peptides for all facets of  
9 immunity have sparked intense discussions in the last 4 years(14,29-31). In cancer,  
10 their presence would dramatically widen the repertoire of potentially targetable  
11 epitopes and may allow for many more tumor-specific antigens (including mutational  
12 derived neoantigens) being presented in various HLA-contexts(16). So far only 6  
13 immunogenic *cis*-spliced HLA-I bound peptides derived from 4 different proteins(29)  
14 have been described and most of them have been discovered by T cell assays rather  
15 than by mass spectrometry(32-37). To test some of the identified spliced peptides for  
16 their ability to activate CD8<sup>+</sup> T cells *in-vitro* we synthesized 26 *cis*-spliced peptides  
17 based on (i) their *de novo* sequencing confidence score, (ii) their binding prediction  
18 score for HLA alleles expressed on LM-MEL-44 cells (HLA-A\*02:01, HLA-  
19 B\*40:01, HLA-B\*44:02 or HLA-C\*05:01) and (iii) the quality of their peptide  
20 spectrum matches (PSMs). When employed as pools of 8-9 individual peptides, all 3  
21 pools evoked immune-responses as measured by intracellular TNF $\alpha$  production in  
22 CD8<sup>+</sup> T cells (Fig. 7A and peptide sequences listed in Fig. 7B) in multiple melanoma  
23 patient and healthy donor derived PBMCs (example shown in Fig. S3B).  
24 Given the differences in the potential to stimulate HLA-A2 positive vs. negative  
25 patient and healthy donor samples, most of the immunogenic peptides derived from

1 Pools I and III in our assays seem to be HLA-A2 associated. To identify specific  
2 immunogenic peptides, PBMCs were stimulated with the listed peptide pools (Fig.  
3 7B) for 10-12 days followed by single peptide re-stimulation. Six out of 26 peptides  
4 induced a TNF- $\alpha$  response above DMSO background (Fig. 7C) in more than one  
5 patient sample. Of note, the peptide demonstrating the highest immunogenicity (1832,  
6 shown as example in Fig. S3C) based on these assays is a spliced peptide derived  
7 from the cancer-testis antigen MAGE-C2 (LILGLLTKV) and showed CD8<sup>+</sup> T cell  
8 activation across all 4 patients. Matched mixed effect analysis showed significant  
9 differences across peptides and peptide 1832 and FEC represented the treatments with  
10 significant differences to DMSO. However, the other shown peptides displayed higher  
11 immunogenic potential when compared to their respective DMSO control, but with  
12 very high patient-to-patient variability, as expected in these types of data,  
13 Interestingly, peptide 1832 was identified across all replicates of LM-MEL-44, -33  
14 and -53 (Table S6). All spliced peptides that tested positive for immunogenicity in our  
15 assays were subjected to T2 peptide binding assays to examine HLA-A2 binding. As  
16 shown in Fig. S4, these peptides all stabilize HLA-A2, albeit to a lesser extent than  
17 the well described modified ELAGIGILTV HLA-A2 peptide (aa26-35) from the  
18 melanoma antigen Melan-A(38) with some just showing minor stabilization.  
19 Of note, we did not find any particular pattern in the length of the *N*- and *C*-terminal  
20 segments of these spliced peptides nor in the distance between these segments on the  
21 protein level (Fig. S5). Taken together, these data show that these spliced peptides can  
22 serve as *bona fide* anti-cancer targets and provide a large number of additional targets  
23 would have not been considered using previous MS-based epitope discovery  
24 strategies.  
25

1 **Discussion:**

2 In this study we have described a detailed and in-depth immunopeptidome presented  
3 on a patient-derived melanoma cell line (LM-MEL-44) generated from a lymph node  
4 metastasis. Our qualitative assessment of the immunopeptidome yielded around  
5 60,000 high confidence peptide identifications that encompassed two culture  
6 conditions (+/- IFN $\gamma$ ) to gain insights into the influence of differences in the  
7 microenvironment of the cells on the global immunopeptidome. Furthermore, we  
8 demonstrated consistence of over 50% of these peptides with a temporally distinct  
9 autologous tumor sample, and 37% with a tumor from a different donor. The well-  
10 described effect of IFN $\alpha$  in mediating changes to the composition of the antigen  
11 processing machinery, coupled with reports of differences in antigen processing  
12 between the constitutive and the immunoproteasome, led us to expect a degree of  
13 difference between the two immunopeptidomes. Nevertheless, our observation that  
14 ~55% of linear and 47% of spliced HLA class I epitopes were exclusive to either  
15 IFN $\gamma$  treated or untreated conditions, was striking. Our observations are also  
16 consistent with recent studies in ovarian and lung cancer(10,11) that demonstrated  
17 profound changes between cytokine treatment conditions.

18 To have a closer look at the “tumor-specific” immunopeptidome landscape, we  
19 focussed on MAA-derived peptides. More than 50% of novel peptides that we  
20 identified were exclusively presented in the presence of IFN $\alpha$ . Interestingly, of the  
21 MAA epitopes that have been previously described in other studies, only 27.7% were  
22 present uniquely in IFN $\gamma$  treated conditions (Fig. 4C). This observation suggests that  
23 many immunoproteasome processed epitopes may be as yet undescribed, since  
24 traditional approaches to identify tumor associated antigens have largely been  
25 undertaken using cells lines under steady state conditions (*i.e.* which express only the

1 constitutive form of the proteasome). It is evident from our study that the steady state  
2 immunopeptidome may vary dramatically from the *in vivo* tumor scenario depending  
3 on the tumor microenvironment at any given time. Though our functional studies did  
4 not reveal a difference in the immunogenicity of peptides derived from either  
5 IFN $\gamma$  treated or untreated conditions, in the *in vivo* setting a T cell response to IFN $\gamma$   
6 related epitopes is likely to be aided by correlative IFN $\gamma$  influences, such as  
7 upregulation of surface HLA(39). The potential for tumor escape from CD8<sup>+</sup> T  
8 lymphocyte killing due to whole scale change to the immunopeptidome upon  
9 initiation of an anti-tumor responses, and corresponding induction of IFN $\gamma$ , is clear  
10 from our studies. These data become particularly significant in the context of recent  
11 studies demonstrating that tumors with an IFN $\gamma$ -inflamed, or ‘hot’ microenvironment  
12 are associated with better prognosis, and are more likely to be amenable to treatment  
13 with immune checkpoint inhibitors(40). It seems conceivable that *in vivo* the  
14 difference between immunopeptidomes is indeed of immunological relevance to  
15 disease progression and overall patient prognosis. Taken together, it is tempting to  
16 speculate that antigens processed *via* the immunoproteasome may represent an  
17 untapped resource of “IFN $\gamma$ -associated neo-epitopes”.

18 This remarkable plasticity in the peptide landscape of melanoma is further increased  
19 by the presence of spliced peptides. The identification of spliced peptides as tumor  
20 antigens in cancer was first described in 2004 in both the FGF5 protein in renal  
21 cancer(32) and the gp100 protein in melanoma(33), and since then only a further 4  
22 *cis*-spliced peptides have been described in cancer(29). Of these 6 spliced peptides, 3  
23 have been shown to be processed exclusively by the constitutive proteasome, and 2 by  
24 both the constitutive and immunoproteasome (and 1 undetermined)(29).



1 Several bioinformatics tools are now available to reliably identify spliced  
2 peptides(13,14,17,18,41). Nevertheless, the contribution of spliced peptides to the  
3 overall immunopeptidome has been reported in a range from 2 to 40% and is still  
4 heavily debated. Recent studies have identified *cis*-spliced peptides in the cancer and  
5 viral infection context (16,17,41), but few have provided experimental evidence of  
6 their immunogenicity (41). In this study we identified 386 *cis*-spliced peptides that  
7 were potentially derived from MAA and therefore considered as potential candidates  
8 to induce therapeutic immune responses. We demonstrated that generation and  
9 presentation of spliced peptides is not a random process since within three biological  
10 replicates we found comparable reproducibility of both linear and spliced peptides.  
11 Interestingly, more than 50% of spliced peptides identified in the LM-MEL-44 cell  
12 line were present on at least one of the other two distinct cell lines (LM-MEL-53 and  
13 33). In addition, we demonstrated the immunogenicity of 6 *cis*-spliced epitopes tested  
14 across multiple patients, strengthening the argument that *cis*-splicing is a random,  
15 functional process leading to diversification of the antigenic pool of peptides. In how  
16 far increased potential to evoke CD8+ T cell activation reflects meaningful and  
17 translatable anti-tumour effects remains to be tested in much larger patient cohorts  
18 with additional clinical data and in a more formal setting.

19 This study and other recent publications which focused on the identification of spliced  
20 peptides (16,42,43) and their impact on the plasticity of the immunopeptidome, will  
21 beyond doubt open up new questions and opportunities in the field. These will range  
22 from the basic understanding of immune-tolerance, autoimmunity and thymic  
23 selection to opportunities for development of novel peptide-based therapeutics. This  
24 includes vaccines in an infectious and cancer setting where predictability and HLA-

1 binding characteristics of linear and constitutive proteasome-derived peptides were  
2 potentially limiting factors.

3

#### 4 **Materials and Methods**

##### 5 *Human ethics approval*

6 Samples used in this study were derived from patients who consented to participate in  
7 a clinical research protocol approved by Austin Health Human Research Ethics  
8 Committee (HREC H2006/02633).

9

##### 10 *Melanoma cell line culture*

11 Establishment and characterization of the melanoma cell lines used has been  
12 previously described(44,45). Cells were cultured in RF10 consisting of RPMI 1640, 2  
13 mM Glutamax, 100 IU/ml Penicillin, 100 µg/ml Streptomycin and 10% heat-  
14 inactivated fetal calf serum (all Invitrogen). For induction of immunoproteasome  
15 catalytic subunits, cells were incubated with 100 ng/ml IFN $\gamma$  (Peprotech) for 72 h  
16 prior to experiments.

17

##### 18 *Melanoma cell line sequencing*

19 Whole exome sequencing of the LM-MEL-44 cell line was performed using the  
20 NimbleGen EZ Exome Library v2.0 kit and run on a Illumina Hiseq2000 instrument  
21 as previously described(46). Sequence reads were aligned to the human genome (hg19  
22 assembly) using the Burrows–Wheeler Aligner (BWA) program(47). Single  
23 nucleotide variants (SNVs) and indels were identified using the GATK Unified  
24 Genotyper(48), Somatic Indel Detector(49) and MuTect (Broad Institute)(50).

25

1 *Isolation of peptides bound to HLA class I molecules*

2 HLA class I peptides were eluted from LM-MEL-44, 33 and 53 cells (prior to or after  
3 treatment with IFN $\gamma$ ) as described previously(51-54). In brief, for replicate one of  
4 LM-MEL-44,  $3 \times 10^9$  cells were lysed in 0.5 % IGEPAL, 50 mM Tris-HCl pH 8.0,  
5 150 mM NaCl supplemented with protease inhibitors (CompleteProtease Inhibitor  
6 Cocktail Tablet; Roche Molecular Biochemicals) for 45 min at 4 °C. Lysates were  
7 cleared by ultracentrifugation at 40,000 g and HLA class I complexes were  
8 immunoaffinity purified using DT9 (anti HLA-C) and W6/32 (pan anti-HLA-I)  
9 monoclonal antibodies. For replicate two and three of LM-MEL-44 and also LM-  
10 MEL-33 and LM-MEL-53,  $5 \times 10^8$  cells (for each sample) were lysed in 0.5 %  
11 IGEPAL, 50 mM Tris-HCl pH 8.0, 150 mM NaCl supplemented with protease  
12 inhibitors for 45 min at 4 °C. Lysates were cleared by ultracentrifugation at 40,000 g  
13 and HLA class I complexes were immunoaffinity purified using W6/32 (pan anti-  
14 HLA-I) monoclonal antibody.

15

16 *Fractionation of HLA-bound peptides by reversed-phase high-performance liquid*  
17 *chromatography (RP-HPLC)*

18 The HLA-peptide eluates were loaded onto a 4.6 mm internal diameter x 50 mm  
19 monolithic C18 RP-HPLC column (Chromolith Speed Rod; Merck) at a flow rate of 1  
20 ml/min using an EttanLC HPLC system (GE Healthcare) with buffer A (0.1 %  
21 trifluoroacetic acid (TFA)) and buffer B (80 % ACN / 0.1 % TFA) as mobile phases.  
22 The bound peptides were separated from the class I heavy chains and  $\beta$ 2m molecules  
23 using an increasing concentration of buffer B. Peptide-containing fractions (500  $\mu$ l)  
24 were collected, vacuum concentrated to ~5  $\mu$ l and combined into nine pools,

1 reconstituted to 12  $\mu$ l with 0.1 % formic acid (FA). Indexed retention time (iRT)  
2 peptides(55) were spiked in for retention time alignment.

3

#### 4 *Identification of HLA bound-peptides using data-dependent acquisition (DDA)*

5 For the first replicate of LM-MEL-44 we used a Dionex UltiMate 3000 RSLCnano  
6 system equipped with a Dionex UltiMate 3000 RS autosampler, the samples were  
7 loaded via an Acclaim PepMap 100 trap column (100  $\mu$ m x 2 cm, nanoViper, C18, 5  
8  $\mu$ m, 100 Å; Thermo Scientific) onto an Acclaim PepMap RSLC analytical column (75  
9  $\mu$ m x 50 cm, nanoViper, C18, 2  $\mu$ m, 100 Å; Thermo Scientific). The peptides were  
10 separated by increasing concentrations of 80 % ACN / 0.1 % FA at a flow of 250  
11 nl/min for 65 min and analyzed with a QExactive Plus mass spectrometer (Thermo  
12 Scientific). In each cycle, a full ms1 scan (resolution: 70.000; AGC target: 3e6;  
13 maximum IT: 120 ms; scan range: 375-1800 m/z) preceded up to 12 subsequent ms2  
14 scans (resolution: 17.500; AGC target: 1e5; maximum IT: 120 ms; isolation window:  
15 1.8 m/z; scan range: 200-2000 m/z; NCE: 27). To minimize repeated sequencing of  
16 the same peptides, dynamic exclusion was set to 15 s and the ‘exclude isotopes’  
17 option was activated.

18 For second and third replicates of LM-MEL-44, LM-MEL-33 and LM-MEL53 we  
19 used a Dionex, Sunnyvale, CA, UltiMate 3000 RSLCnano system equipped with a  
20 Dionex UltiMate 3000 RS auto sampler, the samples were loaded via an Acclaim  
21 PepMap 100 trap column (100  $\mu$ m x 2 cm, nanoViper, C18, 5  $\mu$ m, 100Å; Thermo-  
22 Fisher Scientific, Waltham, MA) onto an Acclaim PepMap RSLC analytical column  
23 (75  $\mu$ m x 50 cm, nanoViper, C18, 2  $\mu$ m, 100 Å; ThermoFisher Scientific). The  
24 peptides were separated by increasing concentrations of 80 % ACN/0.1 % FA at a  
25 flow of 250 nL/min for 158 min and analyzed with an Orbitrap Fusion™ Tribrid™

1 mass spectrometer (ThermoFisher Scientific). 6  $\mu$ L of each sample fraction was  
2 loaded onto the trap column at a flow rate of 15  $\mu$ L/min.  
3 Orbitrap Fusion™ Tribrid™ mass spectrometer (ThermoFisher Scientific) was set to  
4 data-dependent acquisition mode with the following settings: All MS spectra (MS1)  
5 profiles were recorded from full ion scan mode 375-1800 m/z in the Orbitrap  
6 at 120,000 resolution with automatic gain control (AGC) target of 400,000 and  
7 dynamic exclusion of 15 s. The top 12 precursor ions were selected using top speed  
8 mode at a cycle time of 2 s. For MS/MS, a decision tree was made which helped in  
9 selecting peptides of charge state 1 and 2-6 separately. For single charged analytes  
10 only ions falling within the range of m/z 800-1800 were selected. For +2 to +6 m/z s  
11 no such parameter was set. The c-trap was loaded with a target of 200,000 ions with  
12 an accumulation time of 120 ms and isolation width of 1.2 amu. Normalized  
13 collision energy was set to 32 (high energy collisional dissociation (HCD)) and  
14 fragments were analyzed in the Orbitrap at 30,000 resolution.

15

#### 16 *DDA data analysis*

17 Linear and *cis*-spliced peptide sequences were identified as described previously(14).  
18 In brief, the acquired .raw files from six LM-MEL-44 line were searched with  
19 PEAKSStudio X (Bioinformatics Solutions Inc., Waterloo, Ontario, Canada) against  
20 the human UniProtKB/SwissProt (v2017\_10) database, which was manually corrected  
21 for the single nucleotide variants characteristic of the LM-MEL-44 cell line as  
22 identified by whole exome sequencing. The parent mass error tolerance was set to 10  
23 ppm for *de novo* sequencing and database search and the fragment mass error  
24 tolerance to 0.02 Da for both searches. Oxidation of M and deamidation of N & Q  
25 were set as variable modifications and a FDR cutoff of 1% was applied. High

1 confidence *de novo* peptide sequences without any linear peptide match in the  
2 provided database were further interrogated with the “Hybrid finder” algorithm and  
3 the identified *cis*-spliced candidate sequences from all 6 samples combined together  
4 and added back to the original UniProtKB/SwissProt database and all data researched  
5 using PEAKS DB. Linear and *cis*-spliced peptides in this search were extracted at 5%  
6 FDR to create the final list of identified peptides. For identification of linear and *cis*  
7 spliced peptides from LM-MEL-33 and 53, we used this combined database and the  
8 same setting on PEAKS studio.

9

#### 10 *Binding prediction*

11 We used the NetMHC4 (56,57) algorithms for binding predictions for both spliced  
12 and linear peptides. A default rank cut-off of 2 was implemented as a binder peptide.

13

#### 14 *Immunogenicity prediction.*

15 We used the Immune Epitope Database and Analysis Resource (IEDB:  
16 [www.iedb.org](http://www.iedb.org)), Class I Immunogenicity algorithm for immunogenicity predictions of  
17 linear peptides(58). The peptides used in functional assays indicated as “predicted  
18 immunogenic” had an immunogenicity score of between 0.37 and 0.55 (Table S5).

19

#### 20 *T cell stimulation assay*

21 To assess T cell responses selected peptides were synthesized (Mimotopes, VIC,  
22 Australia). PBMC from healthy donors (Australian Red Cross, VIC, Australia), or  
23 melanoma patients (Austin Health HREC approved protocol HREC H2006/02633)  
24 were purified by density centrifugation over Ficoll Hi-Paque. Cells were cultured in  
25 TCRPMI consisting of RPMI 1640, 2 mM Glutamax, 100 IU/ml Penicillin, 100 µg/ml

1 Streptomycin, 20 mM HEPES, 1% nonessential amino acids, 1 mM sodium pyruvate,  
2 55  $\mu$ M  $\beta$ -mercaptoethanol, and 10% human AB serum (Australian Red Cross, VIC,  
3 Australia). Peptides were combined into pools of 5-9 peptides as outlined in  
4 Supplementary Table 6.  $10^6$  PBMC/ml were incubated with 10  $\mu$ M of each peptide in  
5 pools for 10 - 12 days at 37 °C. IL-2 (100 IU/ml) was added and replaced every 3  
6 days. Statistics were performed using GraphPad Prism. For peptide responses in  
7 Figure 6a a repeated-measures 2-way ANOVA was used, and for *cis*-spliced peptide  
8 assays in Figure 7 a matched mixed effect analysis with Dunnett's multiple  
9 comparison test was used to compare each column to DMSO.

10

#### 11 *Intracellular cytokine staining (ICS) of antigen-activated T-lymphocytes*

12 To assess antigen responses, T-lymphocytes were restimulated (following 10 - 12  
13 days incubation as outlined above) with peptide pools for 4-8 h in TCRPMI in  
14 presence of 10  $\mu$ g/ml brefeldin A (BFA, Golgi plug). Cells were washed with PBS  
15 (Invitrogen) labeled with live/dead fixable violet stain (Invitrogen), then incubated  
16 with antibodies against CD3 and CD8 (BD biosciences) for 15 min at 4°C. Samples  
17 were washed and fixed for 20 min at 4°C. Cells were permeabilized and stained with  
18 anti-TNF $\alpha$  (eBiosciences) for 25 min at 4°C. The gating strategy was: SSC/FSC;  
19 Singlets; SSC/LD<sup>-</sup>; CD3<sup>+</sup>/CD8<sup>+</sup>; CD8<sup>+</sup>/TNF $\alpha$ <sup>+</sup>(Fig. S6). Data were acquired on a  
20 FACSCanto (BD biosciences, VIC Australia) and analyzed with FlowJo software  
21 (Version 10, FlowJo, Ashland OR, USA). To account for the large variation in DMSO  
22 background CD8<sup>+</sup> T cell activity across multiple donors, signals were normalized by  
23 subtracting the background from DMSO control treated samples in each case.

24

1 *HLA-A2 stabilization assays*

2 The binding activity of the peptides was assayed by measuring peptide-induced  
3 stabilization of HLA-A2 on TAP-deficient T2 cells by flow cytometry. T2 cells were  
4 cultured in RF-10 (RPMI with 10% serum, 5% Glutamine, 5% Pen/Strep) in T25  
5 flasks for 2 - 3 days before the assay. T2 cells ( $2 \times 10^5$  cells/well) were cultured for 16  
6 h at 37 °C in 5 % CO<sub>2</sub> in 200 µL RF10 in 96-well U-bottomed plates in presence or  
7 absence of 10 µg/ml of synthetic peptides. Peptides from Melan-A (modified aa26-35  
8 ELAGIGILTV and aa 60-72) served as positive or negative controls respectively. All  
9 peptides were tested in triplicate.

10 After 16 h stimulation the cells were washed and stained with anti-HLA A2  
11 monoclonal antibody BB7.2 (Biolegend) for 30 min. at 4 °C. Cells were subsequently  
12 stained with Fixable Viability Kit (Zombie NIR™, Biolegend) for 15 min. at 4 °C  
13 before flow cytometry on a FacsCanto (BD). Data was analyzed using FlowJo  
14 software (Version 10, FlowJo, Ashland OR, USA).

15

16 *Validation spliced peptides using retrospectively synthesized peptides and retention*  
17 *time prediction*

18 We validated the identity of a panel of spliced peptides (including peptides that were  
19 tested for immunogenicity), using 28 synthetic peptides (Mimotopes, Melbourne,  
20 Australia) by comparing chromatographic retention and MS/MS spectra with the  
21 original p-HLA (Fig. S7). The PKL files of the synthetic peptide and corresponded  
22 eluted peptides were exported from PEAKS X studio software. For evaluating the  
23 similarity between two spectra, we predicted all b- and y-ions for each sequence and  
24 then extracted the corresponding intensity for each ion (with a fragment mass error  
25 tolerance of 0.1 Da). The Pearson correlation coefficient and the corresponding p-



1 value (Prism version 8.01, GraphPad) between the log<sub>10</sub> intensities of identified b-  
2 and y-ions in the synthetic and sample derived spectra were calculated (Fig. S7 and  
3 S8) (59). The closer a correlation coefficient to 1, the more identical the spectra. All  
4 tested peptides were found to have a *p*-value of less than 0.05.

5 We calculated the iRT index of each synthetic peptide and corresponding eluted  
6 peptide using the retention time of a standard set of reference peptides (iRT kit,  
7 Biognosys) that were spiked into all samples (Fig. S8) (55).

8 We also used GPTIME tool (59) to compare the predicted versus actual  
9 chromatographic retention time of both the identified linear and spliced peptides. For  
10 each data set generated from LM-MEL-44 cell lines (6 replicates in total) we sorted  
11 peptides (8-12 mer peptides without modification) based on the  $-\log P$  score (high to  
12 low) from Peaks Studio software. We used the first 1000 peptides for training the  
13 algorithm and then used the trained algorithm to predict the retention times of all  
14 linear and spliced peptides in the corresponding dataset (Fig. S9). We also calculated  
15 Grand Average of Hydropathy (GRAVY) Score of all identified 8-12 mer peptides  
16 (Table S1) (60).

17

#### 18 **Acknowledgments:**

19 The authors acknowledge the Monash Proteomics & Metabolomics Facility for the  
20 provision of mass spectrometry instrumentation, training and technical support, as  
21 well as the Monash University Flowcore for flow cytometry instrumentation and  
22 assistance.

23 This project was funded in part by Ludwig Cancer Research, Melanoma Research  
24 Alliance (MRA), the Victorian Cancer Agency supported Melbourne Melanoma  
25 Project (MMP), Australian National Health and Medical Research Council (NHMRC)

1 Project Grants 1007381 and 1165490 (to AWP), and the Victorian State Government  
2 Operational Infrastructure Support Program. AB is supported by a grant from La  
3 Trobe University (RFA Understanding Disease). CL is supported by an Australian  
4 NHMRC CJ Martin Early Career Fellowship 1143366. JC was supported by  
5 Australian NHMRC Practitioner Fellowship 487905. AWP is supported by NHMRC  
6 Principal Research Fellowship 1137739. AB is the recipient of a Fellowship from the  
7 Victorian Government Department of Health and Human Services acting through the  
8 Victorian Cancer Agency.

9 Computational resources were supported by the R@CMon/Monash Node of the  
10 NeCTAR Research Cloud, an initiative of the Australian Government's Super Science  
11 Scheme and the Education Investment Fund.

12 The mass spectrometry proteomics data have been deposited to the ProteomeXchange  
13 Consortium via the PRIDE (61) partner repository with the dataset identifier  
14 PXD014397 and 10.6019/PXD014397 (Username: reviewer73736@ebi.ac.uk,  
15 Password: LIBn7t49).

16 **Conflict of Interest Statement:** The authors declare no conflict of interest.

17

18

19 **References:**

- 20 1. Cai L, Michelakos T, Yamada T, Fan S, Wang X, Schwab JH, *et al.* Defective  
21 HLA class I antigen processing machinery in cancer. *Cancer Immunol*  
22 *Immunother* **2018**;67(6):999-1009 doi 10.1007/s00262-018-2131-2.  
23 2. Parmiani G, De Filippo A, Novellino L, Castelli C. Unique human tumor  
24 antigens: immunobiology and use in clinical trials. *J Immunol*  
25 **2007**;178(4):1975-9.  
26 3. Goodman AM, Kato S, Bazhenova L, Patel SP, Frampton GM, Miller V, *et al.*  
27 Tumor Mutational Burden as an Independent Predictor of Response to  
28 Immunotherapy in Diverse Cancers. *Mol Cancer Ther* **2017**;16(11):2598-608  
29 doi 10.1158/1535-7163.MCT-17-0386.  
30 4. Schumacher TN, Schreiber RD. Neoantigens in cancer immunotherapy.  
31 *Science* **2015**;348(6230):69-74 doi 10.1126/science.aaa4971.

- 1 5. Ott PA, Hu Z, Keskin DB, Shukla SA, Sun J, Bozym DJ, *et al.* An  
2 immunogenic personal neoantigen vaccine for patients with melanoma. *Nature*  
3 **2017**;547(7662):217-21 doi 10.1038/nature22991.
- 4 6. Yadav M, Jhunjunwala S, Phung QT, Lupardus P, Tanguay J, Bumbaca S, *et*  
5 *al.* Predicting immunogenic tumour mutations by combining mass  
6 spectrometry and exome sequencing. *Nature* **2014**;515(7528):572-6 doi  
7 10.1038/nature14001.
- 8 7. Vigneron N, Van den Eynde BJ. Proteasome subtypes and regulators in the  
9 processing of antigenic peptides presented by class I molecules of the major  
10 histocompatibility complex. *Biomolecules* **2014**;4(4):994-1025 doi  
11 10.3390/biom4040994.
- 12 8. Dahlmann B. Mammalian proteasome subtypes: Their diversity in structure  
13 and function. *Arch Biochem Biophys* **2016**;591:132-40 doi  
14 10.1016/j.abb.2015.12.012.
- 15 9. Yang Y, Waters JB, Fruh K, Peterson PA. Proteasomes are regulated by  
16 interferon gamma: implications for antigen processing. *Proc Natl Acad Sci U*  
17 *S A* **1992**;89(11):4928-32.
- 18 10. Javitt A, Barnea E, Kramer M, Wolf-Levy H, Levin Y, Admon A, *et al.* Pro-  
19 inflammatory cytokines alter the immunopeptidome landscape by modulation  
20 of HLA-B expression. *Frontiers in Immunology* **2019**;10(141) doi  
21 10.3389/fimmu.2019.00141.
- 22 11. Chong C, Marino F, Pak H, Racle J, Daniel RT, Muller M, *et al.* High-  
23 throughput and Sensitive Immunopeptidomics Platform Reveals Profound  
24 Interferongamma-Mediated Remodeling of the Human Leukocyte Antigen  
25 (HLA) Ligandome. *Mol Cell Proteomics* **2018**;17(3):533-48 doi  
26 10.1074/mcp.TIR117.000383.
- 27 12. Woods K, Knights AJ, Anaka M, Schittenhelm RB, Purcell AW, Behren A, *et*  
28 *al.* Mismatch in epitope specificities between IFNgamma inflamed and  
29 uninfamed conditions leads to escape from T lymphocyte killing in  
30 melanoma. *J Immunother Cancer* **2016**;4:10 doi 10.1186/s40425-016-0111-7.
- 31 13. Liepe J, Marino F, Sidney J, Jeko A, Bunting DE, Sette A, *et al.* A large  
32 fraction of HLA class I ligands are proteasome-generated spliced peptides.  
33 *Science* **2016**;354(6310):354-8 doi 10.1126/science.aaf4384.
- 34 14. Faridi P, Li C, Ramarathinam SH, Vivian JP, Illing PT, Mifsud NA, *et al.* A  
35 subset of HLA-I peptides are not genomically templated: Evidence for cis- and  
36 trans-spliced peptide ligands. *Sci Immunol* **2018**;3(28) doi  
37 10.1126/sciimmunol.aar3947.
- 38 15. Faridi P, Purcell AW, Croft NP. In Immunopeptidomics We Need a Sniper  
39 Instead of a Shotgun. *Proteomics* **2018**;18(12):e1700464 doi  
40 10.1002/pmic.201700464.
- 41 16. Liepe J, Sidney J, Lorenz FKM, Sette A, Mishto M. Mapping the MHC Class  
42 I-Spliced Immunopeptidome of Cancer Cells. *Cancer Immunol Res*  
43 **2019**;7(1):62-76 doi 10.1158/2326-6066.CIR-18-0424.
- 44 17. Mylonas R, Beer I, Iseli C, Chong C, Pak HS, Gfeller D, *et al.* Estimating the  
45 Contribution of Proteasomal Spliced Peptides to the HLA-I Ligandome. *Mol*  
46 *Cell Proteomics* **2018**;17(12):2347-57 doi 10.1074/mcp.RA118.000877.
- 47 18. Rolfs Z, Solntsev SK, Shortreed MR, Frey BL, Smith LM. Global  
48 Identification of Post-Translationally Spliced Peptides with Neo-Fusion. *J*  
49 *Proteome Res* **2018** doi 10.1021/acs.jproteome.8b00651.

- 1 19. Ebert LM, Tan BS, Browning J, Svobodova S, Russell SE, Kirkpatrick N, *et al.* The regulatory T cell-associated transcription factor FoxP3 is expressed by  
2 tumor cells. *Cancer Res* **2008**;68(8):3001-9 doi 10.1158/0008-5472.CAN-07-  
3 5664.
- 4 20. Alexandrov LB, Nik-Zainal S, Wedge DC, Aparicio SA, Behjati S, Biankin  
5 AV, *et al.* Signatures of mutational processes in human cancer. *Nature*  
6 **2013**;500(7463):415-21 doi 10.1038/nature12477.
- 7 21. Behren A, Anaka M, Lo PH, Vella LJ, Davis ID, Catimel J, *et al.* The Ludwig  
8 Institute for Cancer Research Melbourne Melanoma Cell Line Panel. *Pigment*  
9 *Cell & Melanoma Research* **2013**;26(4) doi 10.1111/pcmr.12097.
- 10 22. Pitcovski J, Shahar E, Aizenshtein E, Gorodetsky R. Melanoma antigens and  
11 related immunological markers. *Crit Rev Oncol Hematol* **2017**;115:36-49 doi  
12 10.1016/j.critrevonc.2017.05.001.
- 13 23. Simpson AJ, Caballero OL, Jungbluth A, Chen YT, Old LJ. Cancer/testis  
14 antigens, gametogenesis and cancer. *Nat Rev Cancer* **2005**;5(8):615-25 doi  
15 10.1038/nrc1669.
- 16 24. Vigneron N, Stroobant V, Van den Eynde BJ, van der Bruggen P. Database of  
17 T cell-defined human tumor antigens: the 2013 update. *Cancer Immun*  
18 **2013**;13:15.
- 19 25. Ritz D, Kinzi J, Neri D, Fugmann T. Data-Independent Acquisition of HLA  
20 Class I Peptidomes on the Q Exactive Mass Spectrometer Platform.  
21 *Proteomics* **2017**;17(19) doi 10.1002/pmic.201700177.
- 22 26. Gloger A, Ritz D, Fugmann T, Neri D. Mass spectrometric analysis of the  
23 HLA class I peptidome of melanoma cell lines as a promising tool for the  
24 identification of putative tumor-associated HLA epitopes. *Cancer Immunol*  
25 *Immunother* **2016**;65(11):1377-93 doi 10.1007/s00262-016-1897-3.
- 26 27. Anaya J. OncoLnc: linking TCGA survival data to mRNAs, miRNAs, and  
27 lncRNAs. *PeerJ CompSci* **2016**;2(e67) doi 10.7717/peerj-cs.67.
- 28 28. Vita R, Mahajan S, Overton JA, Dhanda SK, Martini S, Cantrell JR, *et al.* The  
29 Immune Epitope Database (IEDB): 2018 update. *Nucleic Acids Res*  
30 **2019**;47(D1):D339-D43 doi 10.1093/nar/gky1006.
- 31 29. Vigneron N, Ferrari V, Stroobant V, Abi Habib J, Van den Eynde BJ. Peptide  
32 splicing by the proteasome. *J Biol Chem* **2017**;292(51):21170-9 doi  
33 10.1074/jbc.R117.807560.
- 34 30. Platteel ACM, Liepe J, van Eden W, Mishto M, Sijts A. An Unexpected Major  
35 Role for Proteasome-Catalyzed Peptide Splicing in Generation of T Cell  
36 Epitopes: Is There Relevance for Vaccine Development? *Front Immunol*  
37 **2017**;8:1441 doi 10.3389/fimmu.2017.01441.
- 38 31. Liepe J, Ovaa H, Mishto M. Why do proteases mess up with antigen  
39 presentation by re-shuffling antigen sequences? *Curr Opin Immunol*  
40 **2018**;52:81-6 doi 10.1016/j.coi.2018.04.016.
- 41 32. Hanada K, Yewdell JW, Yang JC. Immune recognition of a human renal  
42 cancer antigen through post-translational protein splicing. *Nature*  
43 **2004**;427(6971):252-6 doi 10.1038/nature02240.
- 44 33. Vigneron N, Stroobant V, Chapiro J, Ooms A, Degiovanni G, Morel S, *et al.*  
45 An antigenic peptide produced by peptide splicing in the proteasome. *Science*  
46 **2004**;304(5670):587-90 doi 10.1126/science.1095522.
- 47 34. Warren EH, Vigneron NJ, Gavin MA, Coulie PG, Stroobant V, Dalet A, *et al.*  
48 An antigen produced by splicing of noncontiguous peptides in the reverse  
49 order. *Science* **2006**;313(5792):1444-7 doi 10.1126/science.1130660.
- 50

- 1 35. Dalet A, Robbins PF, Stroobant V, Vigneron N, Li YF, El-Gamil M, *et al.* An  
2 antigenic peptide produced by reverse splicing and double asparagine  
3 deamidation. *Proc Natl Acad Sci U S A* **2011**;108(29):E323-31 doi  
4 10.1073/pnas.1101892108.
- 5 36. Michaux A, Larrieu P, Stroobant V, Fonteneau JF, Jotereau F, Van den Eynde  
6 BJ, *et al.* A spliced antigenic peptide comprising a single spliced amino acid is  
7 produced in the proteasome by reverse splicing of a longer peptide fragment  
8 followed by trimming. *J Immunol* **2014**;192(4):1962-71 doi  
9 10.4049/jimmunol.1302032.
- 10 37. Ebstein F, Keller M, Paschen A, Walden P, Seeger M, Burger E, *et al.*  
11 Exposure to Melan-A/MART-126-35 tumor epitope specific CD8(+)T cells  
12 reveals immune escape by affecting the ubiquitin-proteasome system (UPS).  
13 *Sci Rep* **2016**;6:25208 doi 10.1038/srep25208.
- 14 38. Kawakami Y, Eliyahu S, Sakaguchi K, Robbins PF, Rivoltini L, Yannelli JR,  
15 *et al.* Identification of the immunodominant peptides of the MART-1 human  
16 melanoma antigen recognized by the majority of HLA-A2-restricted tumor  
17 infiltrating lymphocytes. *J Exp Med* **1994**;180(1):347-52.
- 18 39. Basham TY, Bourgeade MF, Creasey AA, Merigan TC. Interferon increases  
19 HLA synthesis in melanoma cells: interferon-resistant and -sensitive cell lines.  
20 *Proc Natl Acad Sci U S A* **1982**;79(10):3265-9.
- 21 40. Tumeh PC, Harview CL, Yearley JH, Shintaku IP, Taylor EJ, Robert L, *et al.*  
22 PD-1 blockade induces responses by inhibiting adaptive immune resistance.  
23 *Nature* **2014**;515(7528):568-71 doi 10.1038/nature13954.
- 24 41. Paes W, Leonov G, Partridge T, Chikata T, Murakoshi H, Frangou A, *et al.*  
25 Contribution of proteasome-catalyzed peptide cis-splicing to viral targeting by  
26 CD8(+) T cells in HIV-1 infection. *Proceedings of the National Academy of  
27 Sciences of the United States of America* **2019**;116(49):24748-59 doi  
28 10.1073/pnas.1911622116.
- 29 42. Kuckelkorn U, Stubler S, Textoris-Taube K, Kilian C, Niewianda A, Henklein  
30 P, *et al.* Proteolytic dynamics of human 20S thymoproteasome. *J Biol Chem*  
31 **2019**;294(19):7740-54 doi 10.1074/jbc.RA118.007347.
- 32 43. Mishto M, Mansurkhodzhaev A, Ying G, Bitra A, Cordfunke RA, Henze S, *et  
33 al.* An in silico-in vitro Pipeline Identifying an HLA-A(\*)02:01(+) KRAS  
34 G12V(+) Spliced Epitope Candidate for a Broad Tumor-Immune Response in  
35 Cancer Patients. *Front Immunol* **2019**;10:2572 doi  
36 10.3389/fimmu.2019.02572.
- 37 44. Anaka M, Freyer C, Gedye C, Caballero O, Davis ID, Behren A, *et al.* Stem  
38 cell media culture of melanoma results in the induction of a nonrepresentative  
39 neural expression profile. *Stem Cells* **2012**;30(2):336-43 doi  
40 10.1002/stem.786.
- 41 45. Behren A, Anaka M, Lo PH, Vella LJ, Davis ID, Catimel J, *et al.* The Ludwig  
42 institute for cancer research Melbourne melanoma cell line panel. *Pigment  
43 Cell Melanoma Res* **2013**;26(4):597-600 doi 10.1111/pcmr.12097.
- 44 46. Wong SQ, Behren A, Mar VJ, Woods K, Li J, Martin C, *et al.* Whole exome  
45 sequencing identifies a recurrent RQCD1 P131L mutation in cutaneous  
46 melanoma. *Oncotarget* **2015**;6(2):1115-27 doi 10.18632/oncotarget.2747.
- 47 47. Li H, Durbin R. Fast and accurate short read alignment with Burrows-Wheeler  
48 transform. *Bioinformatics* **2009**;25(14):1754-60 doi  
49 10.1093/bioinformatics/btp324.

- 1 48. McKenna A, Hanna M, Banks E, Sivachenko A, Cibulskis K, Kernysky A, *et*  
2 *al.* The Genome Analysis Toolkit: a MapReduce framework for analyzing  
3 next-generation DNA sequencing data. *Genome Res* **2010**;20(9):1297-303 doi  
4 10.1101/gr.107524.110.
- 5 49. DePristo MA, Banks E, Poplin R, Garimella KV, Maguire JR, Hartl C, *et al.* A  
6 framework for variation discovery and genotyping using next-generation DNA  
7 sequencing data. *Nat Genet* **2011**;43(5):491-8 doi 10.1038/ng.806.
- 8 50. Cibulskis K, Lawrence MS, Carter SL, Sivachenko A, Jaffe D, Sougnez C, *et*  
9 *al.* Sensitive detection of somatic point mutations in impure and heterogeneous  
10 cancer samples. *Nat Biotechnol* **2013**;31(3):213-9 doi 10.1038/nbt.2514.
- 11 51. Illing PT, Vivian JP, Dudek NL, Kostenko L, Chen Z, Bharadwaj M, *et al.*  
12 Immune self-reactivity triggered by drug-modified HLA-peptide repertoire.  
13 *Nature* **2012**;486(7404):554-8 doi 10.1038/nature11147.
- 14 52. Croft NP, Smith SA, Wong YC, Tan CT, Dudek NL, Flesch IE, *et al.* Kinetics  
15 of antigen expression and epitope presentation during virus infection. *PLoS*  
16 *Pathog* **2013**;9(1):e1003129 doi 10.1371/journal.ppat.1003129.
- 17 53. Schittenhelm RB, Sian TC, Wilmann PG, Dudek NL, Purcell AW. Revisiting  
18 the arthritogenic peptide theory: quantitative not qualitative changes in the  
19 peptide repertoire of HLA-B27 allotypes. *Arthritis Rheumatol*  
20 **2015**;67(3):702-13 doi 10.1002/art.38963.
- 21 54. Purcell AW, Ramarathnam SH, Ternette N. Mass spectrometry-based  
22 identification of MHC-bound peptides for immunopeptidomics. *Nat Protoc*  
23 **2019**;14(6):1687-707 doi 10.1038/s41596-019-0133-y.
- 24 55. Escher C, Reiter L, MacLean B, Ossola R, Herzog F, Chilton J, *et al.* Using  
25 iRT, a normalized retention time for more targeted measurement of peptides.  
26 *Proteomics* **2012**;12(8):1111-21 doi 10.1002/pmic.201100463.
- 27 56. Andreatta M, Nielsen M. Gapped sequence alignment using artificial neural  
28 networks: application to the MHC class I system. *Bioinformatics*  
29 **2016**;32(4):511-7 doi 10.1093/bioinformatics/btv639.
- 30 57. Nielsen M, Lundegaard C, Worning P, Lauemoller SL, Lamberth K, Buus S,  
31 *et al.* Reliable prediction of T-cell epitopes using neural networks with novel  
32 sequence representations. *Protein Sci* **2003**;12(5):1007-17 doi  
33 10.1110/ps.0239403.
- 34 58. Calis JJA, Maybeno M, Greenbaum JA, Weiskopf D, De Silva AD, Sette A, *et*  
35 *al.* Properties of MHC Class I Presented Peptides That Enhance  
36 Immunogenicity. *Plos Comput Biol* **2013**;9(10) doi ARTN e1003266  
37 10.1371/journal.pcbi.1003266.
- 38 59. Falth M, Svensson M, Nilsson A, Skold K, Fenyo D, Andren PE. Validation  
39 of endogenous peptide identifications using a database of tandem mass  
40 spectra. *Journal of Proteome Research* **2008**;7(7):3049-53 doi  
41 10.1021/pr800036d.
- 42 60. Kyte J, Doolittle RF. A simple method for displaying the hydropathic  
43 character of a protein. *J Mol Biol* **1982**;157(1):105-32 doi 10.1016/0022-  
44 2836(82)90515-0.
- 45 61. Perez-Riverol Y, Csordas A, Bai J, Bernal-Llinares M, Hewapathirana S,  
46 Kundu DJ, *et al.* The PRIDE database and related tools and resources in 2019:  
47 improving support for quantification data. *Nucleic Acids Res*  
48 **2019**;47(D1):D442-D50 doi 10.1093/nar/gky1106.

- 1 62. Shao W, Pedrioli PGA, Wolski W, Scurtescu C, Schmid E, Vizcaino JA, *et al.*  
2 The SysteMHC Atlas project. *Nucleic Acids Res* **2018**;46(D1):D1237-D47 doi  
3 10.1093/nar/gkx664.  
4 63. Bassani-Sternberg M, Braunlein E, Klar R, Engleitner T, Sinitcyn P, Audehm  
5 S, *et al.* Direct identification of clinically relevant neoepitopes presented on  
6 native human melanoma tissue by mass spectrometry. *Nat Commun*  
7 **2016**;7:13404 doi 10.1038/ncomms13404.  
8

1 **Figure legends:**

2 **Figure 1. The melanoma immunopeptidome consists of linear and spliced**  
3 **peptides in the presence and absence of IFN $\alpha$ .** **A**, 6-8 % of peptides presented by  
4 the LM-MEL-44 cell line were *cis*-spliced peptides across 3 replicates. **B**, Length  
5 distribution analysis showed that majority of linear and *cis*-spliced peptides were 9  
6 mers in the presence and absence of IFN $\alpha$ . **C**, Using the NetMHC4.0 algorithm,  
7 binding of identified 8-12 mer peptides to all HLA-I haplotypes presented by LM-  
8 MEL-44 was predicted.

9

10 **Figure 2. Generation and presentation of spliced peptides is not random process.**

11 **A**, Reproducibility of linear and *cis*-spliced peptides across biological replicates with  
12 around half of the of linear *cis*-spliced of peptides identified in at least two out of  
13 three replicates. **B**, A high proportion of linear and spliced peptides presented on LM-  
14 MEL-44 cell were also identified on other melanoma cell lines. The yellow circle  
15 (defined as 100%) represents all peptides that were identified across all six LM-MEL-  
16 44 samples. The green and orange circles represent the proportion of those peptides  
17 that were also identified to be presented on LM-Mel-53 and LM-Mel-33, respectively.

18

19 **Figure 3. The melanoma immunopeptidome is substantially altered following**

20 **exposure to IFN $\gamma$ .** **A**, Around 20% of linear and 25% of spliced peptides presented by  
21 HLA-I were lost following treatment with IFN $\alpha$ , alongside a concurrent increase in  
22 novel peptides. **B**, Among peptides identified in 3 replicates both with and without  
23 IFN $\alpha$ , an elevation in the number of peptides that bound to HLA-B, compared to  
24 HLA-A and C, was observed.

25



1 **Figure 4. Novel and previously described linear and spliced peptides from**  
2 **melanoma specific antigens were identified.** A, Both linear and *cis*-spliced peptides  
3 derived from MAA were identified in the LM-MEL-44 immunopeptidome. B, A  
4 substantial proportion of identified MAA have not been previously described. C,  
5 Proportion of MAA-associated epitopes in the presence and absence of IFN  $\gamma$ .  
6 Almost 70% of novel identified peptides were solely present in the presence of IFN $\gamma$   
7 or generated through post translational splicing. IEDB website ([www.iedb.org](http://www.iedb.org)) (28),  
8 SysteMHC (<https://systemhcatlas.org/>)(62) and (63) were used as resources for known  
9 peptides.

10

11 **Figure 5. Immunoproteasome expression is associated with survival benefit in**  
12 **melanoma patients.** Using the TCGA-SKCM and FM-AD datasets looking at nevi  
13 and melanomas, we selected patients whose tumors had highest (top quartile) or  
14 lowest (bottom quartile) expression of each immunoproteasome (IP) or constitutive  
15 proteasome (cP) subunits as indicated in the figure. To correct for immune infiltration,  
16 the top quartile of CD3g expressing samples were removed. The remainder of samples  
17 with high or low expression of a given proteasome subunit were plotted on the basis  
18 of patient survival over time using a Kaplan Meier survival curve  
19 ([astatsa.com/LogRankTest/](http://astatsa.com/LogRankTest/)).

20

21 **Figure 6: Immunogenicity of identified melanoma-associated epitopes.**

22 Selected MAA peptides were pooled and incubated at 10  $\mu$ M final concentration with  
23 PBMC from healthy donors (n=4) or melanoma patients (n=6) for 10 days in presence  
24 of IL-2. Melanoma patient 2 is the patient from which the LM-MEL-44 cell line was  
25 derived. Melanoma patient 6 was a HLA-unmatched negative control. All other

1 donors were HLA-matched over at least two allotypes. On day 10, CD8<sup>+</sup> T  
2 lymphocytes were re-stimulated with individual peptides. Additionally cells were  
3 stimulated with pools of selected peptides whose HLA-presentation was found to be  
4 up/down regulated or unchanged in presence of IFN $\gamma$  as indicated. TNF $\alpha$  expression  
5 measured by ICS. Data show the percentage of TNF $\alpha$ <sup>+</sup> CD8<sup>+</sup> T lymphocytes in  
6 response to each peptide as individual values (A) or combined (B). \* denotes peptides  
7 with the highest *in silico* predicted immunogenicity. In (A) all responses shown were  
8 significantly greater (p<0.05) than their respective matched DMSO control and the  
9 line denotes a conservative, arbitrary, cut-off for peptides inducing an immune  
10 response. Peptide pools outline in Table S5.

11

12 **Figure 7. Immunogenicity of cis-spliced peptide pools. A**, PBMCs from melanoma  
13 patients and healthy donors (HD) were stimulated with pooled peptides (n=8-9) for 10  
14 days in the presence of IL-2. Cells were re-stimulated with the same pools for 8 h in  
15 the presence of BFA and TNF $\alpha$  expression measured by ICS. DMSO and FEC served  
16 as negative or positive control respectively. **B**, Amino acid sequence of peptide pools  
17 used in A. **C**, PBMCs from melanoma patients pre-stimulated with the pooled  
18 peptides as in A were re-stimulated with single peptides from the same pool after 12  
19 days for 8 h in the presence of BFA and TNF $\alpha$  expression measured by ICS. DMSO  
20 and FEC served as negative or positive control respectively. % of TNF $\alpha$ <sup>+</sup> CD8<sup>+</sup> cells  
21 of peptides that gave a signal above background (DMSO) are shown. Statistics was  
22 performed using Graphpad Prism as described in Material and Methods, \*\*\*\*  
23 p<0.0001 and \*\* p<0.001 after Dunnett's multiple comparison test.

24

1 **Supplementary Figures:**

2 **Figure S1. IFN $\gamma$  treatment increase the expression of HLA-I molecules.** The  
3 melanoma cell lines LM-MEL-33, -44, and -53 were cultured in presence/absence of  
4 100 ng/ml IFN $\gamma$  for 72 h. Cells were labelled with anti-pan HLA-I and the expression  
5 of HLA-I on the cell surface was determined by flow cytometry. \*=p<0.05,  
6 \*\*=p<0.001.

7

8 **Figure S2.** Using the TCGA-SKCM and FM-AD datasets looking at nevi and  
9 melanomas, we selected patients whose tumors had highest (top quartile) or lowest  
10 (bottom quartile) expression of each immunoproteasome (IP) or constitutive  
11 proteasome (cP) subunits as indicated in the figure. Samples with high or low  
12 expression of a given proteasome subunit were plotted on the basis of patient survival  
13 over time using a Kaplan Meier survival curve ([astatsa.com/LogRankTest/](http://astatsa.com/LogRankTest/)).

14

15 **Figure S3. The FACS plot examples for the peptide stimulations.** **A**, FACS plot  
16 showing TNF $\alpha$  vs CD8 in selected patients re-stimulated with either linear peptides.  
17 **B**, pools of spliced peptides. **C**, or single spliced peptides. DMSO stimulations served  
18 as negative and background control and FEC as positive control. Labelling denotes  
19 first stimulation and re-stimulation.

20

21

22 **Figure S4.** *Cis*-spliced peptides that stimulated CD8<sup>+</sup> T cells as measured by TNF $\alpha$  so  
23 a higher degree than DMSO in at least 1 patient plus some randomly picked *cis*-  
24 spliced peptides were subjected to HLA-A2 stabilization assays on T2 cells as  
25 described in M&M. None HLA-A2 binding peptides (B7) or the Melan-A modified

1 HLA-A2 epitope served as negative and positive control respectively.\* denotes  
2 immunogenic peptides.

3

4 **Figure S5.** A, Length distribution of the region separating the N- and C-terminal  
5 segment of a cis-spliced peptide on the protein level (in amino acids). B-F, Length  
6 distribution of N- and C-terminal segments of *cis*-spliced peptides, shown for 8-12  
7 mers (in amino acids).

8

9 **Figure S6.** Flow cytometry gating strategy. **A**, Cells were gated based on size (FSC-  
10 A/SSC-A), doublets and dead cells were excluded, and this strategy was used for all  
11 samples. The DMSO-treated negative control. **B**, was used to set the TNF $\alpha$ <sup>+</sup>/CD8<sup>+</sup>  
12 gate after CD3<sup>+</sup>/CD8<sup>+</sup> gating. An example of a peptide-specific CD8<sup>+</sup> T cell response  
13 is shown (C).

14

15 **Figure S7.** Pearson r value correlation score of b and y ions in spectra from 28 eluted  
16 *cis*-spliced peptides from LM-MEL-44 cell line compared with their synthetic  
17 versions. This analysis approved the authenticity of 27 sequences and disapproved  
18 one sequence.

19

20 **Figure S8.** Comparison of MS2 spectra and iRT value of 28 *cis*-spliced peptides  
21 versus their corresponding synthetic version.

22

23 **Figure S9.** Comparison of predicted vs real retention time of linear and *cis*-spliced  
24 peptides by using GPTIME tool (55) . There was not a difference between linear and  
25 spliced peptide in this analysis in any of datasets.

1 **Supplementary Tables:**

2 **Table S1.** Identified Linear and *cis*-spliced peptides. Sheet 1; all 8-12 mer identified  
3 peptides and their presence in other cell lines or reported before (note that in spliced  
4 peptides, L stands for both leucine and isoleucine.). Sheet2; Shared peptides between  
5 six LM-MEL-44 samples. Sheet 3. List of LM-MEL-44 peptides presented in each  
6 condition. Sheet 4-13 raw export of PEAKS X software for each dataset.

7 **Table S2.** Binding prediction for identified linear and *cis*-spliced peptides from LM-  
8 MEL-44 cell line

9 **Table S3.** Predicted mutated peptides based on LM-MEL-44 sequencing data

10 **Table S4.** Melanoma associated antigens derived linear and *cis*-spliced peptides

11 **Table S5.** Selected linear peptides used for immunogenicity assay

12 **Table S6:** Presence of immunogenic linear and spliced sample across different cell  
13 lines

14

Fig.1 A

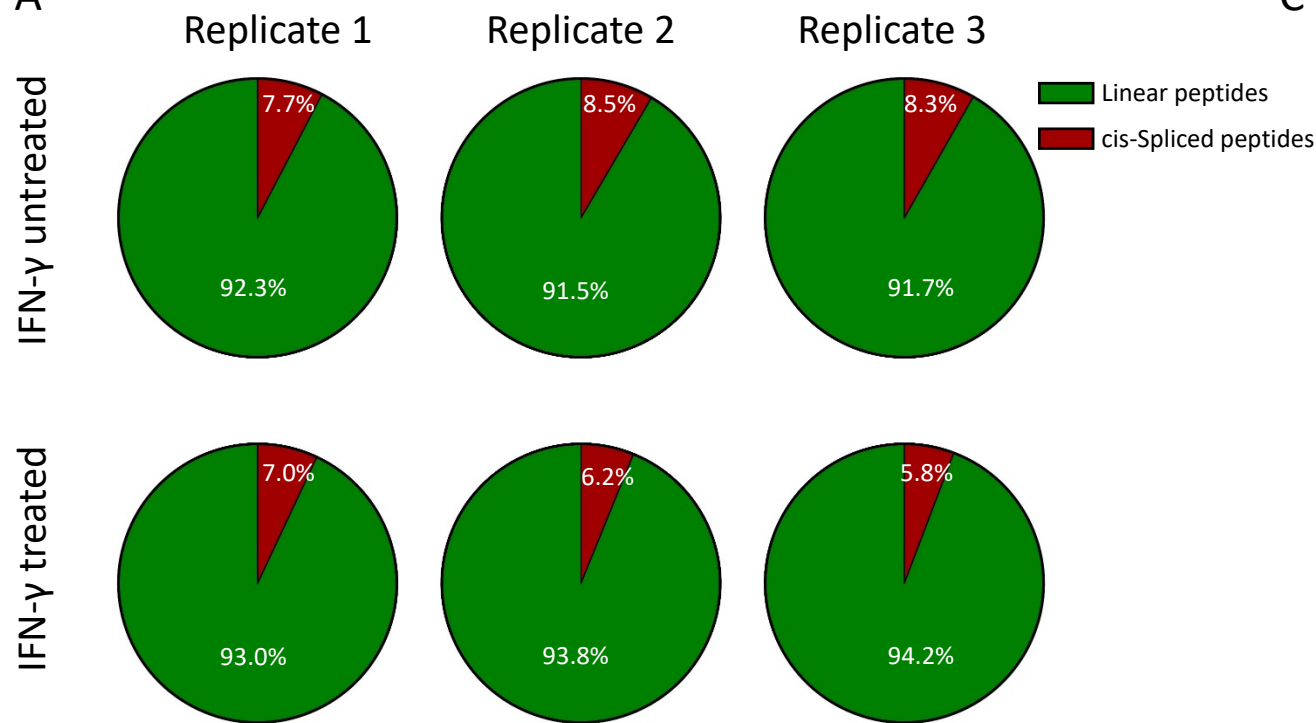

C

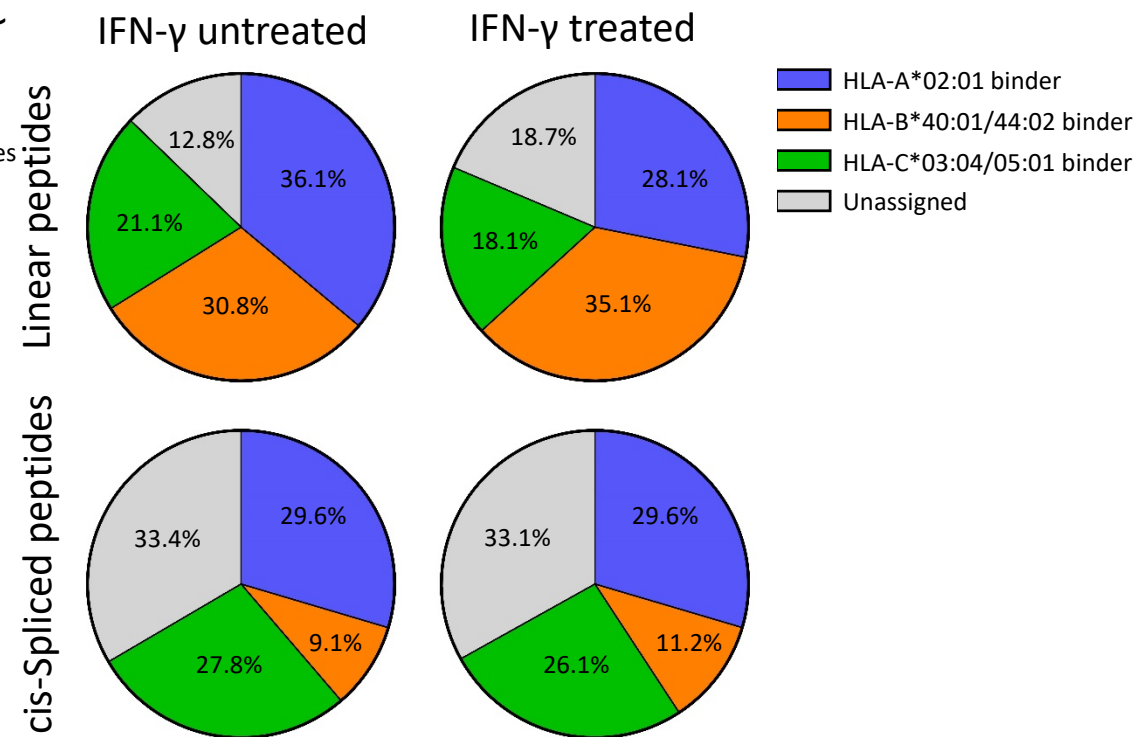

B

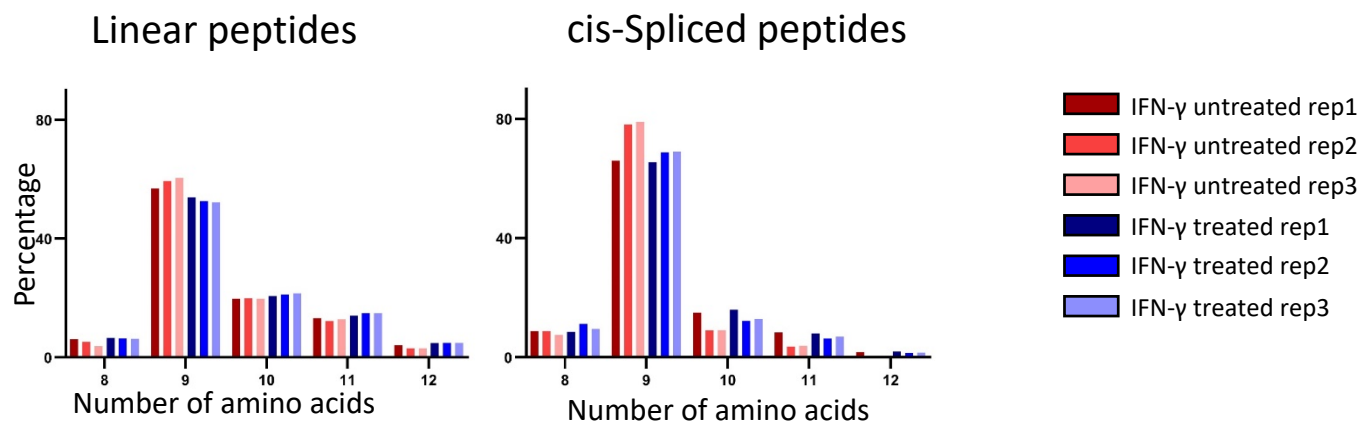

Fig.2

A

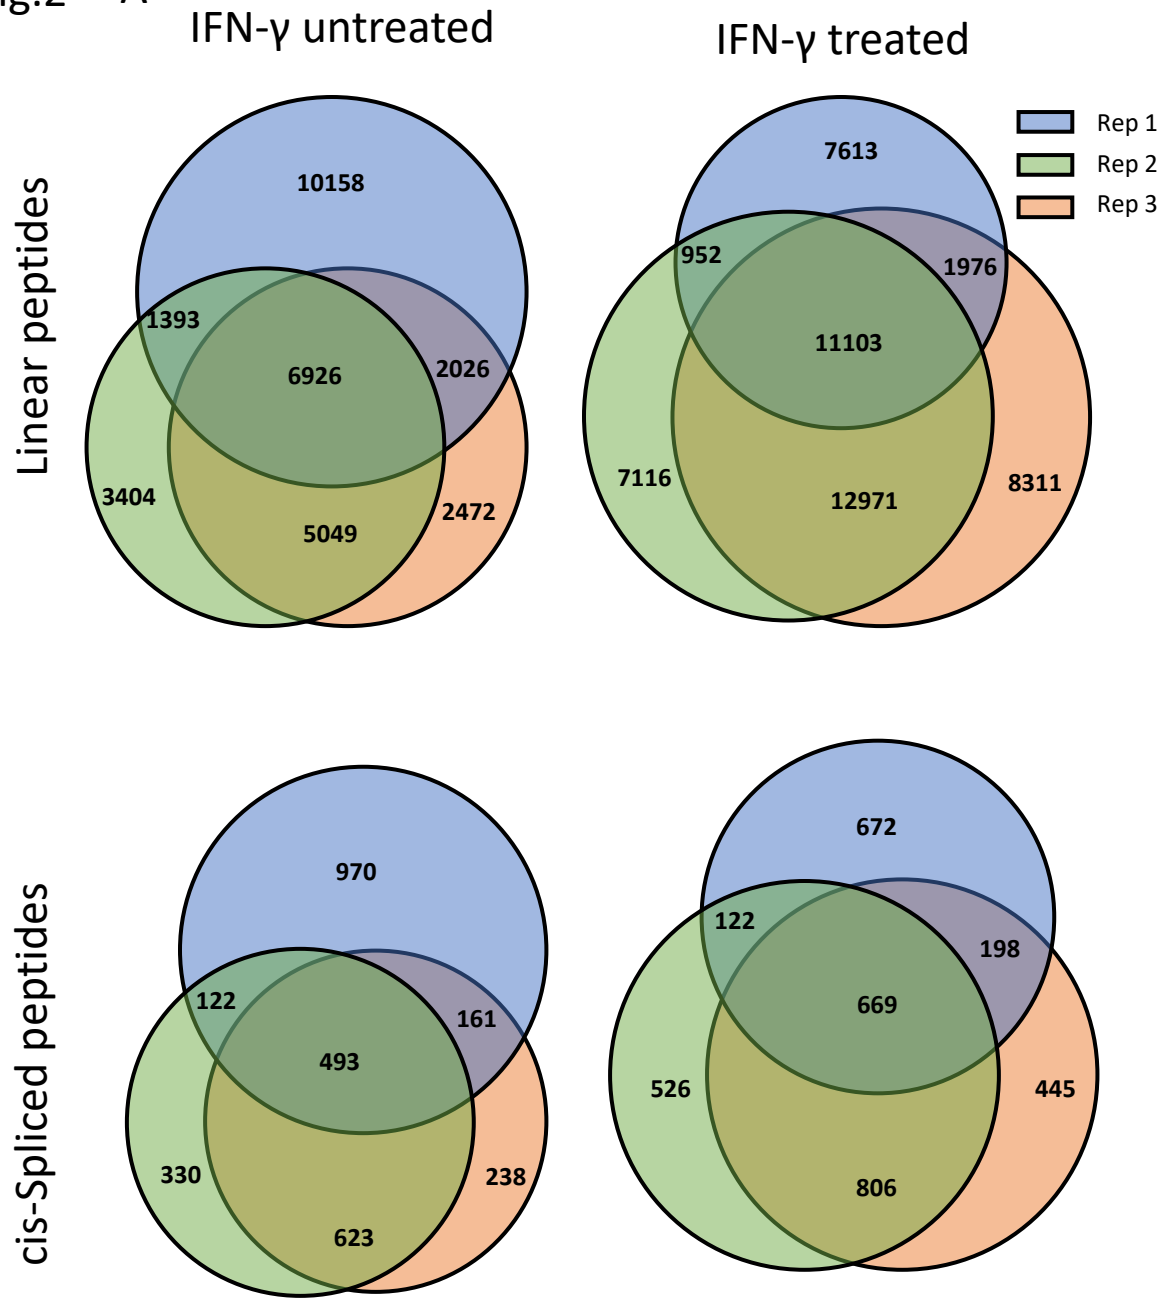

B

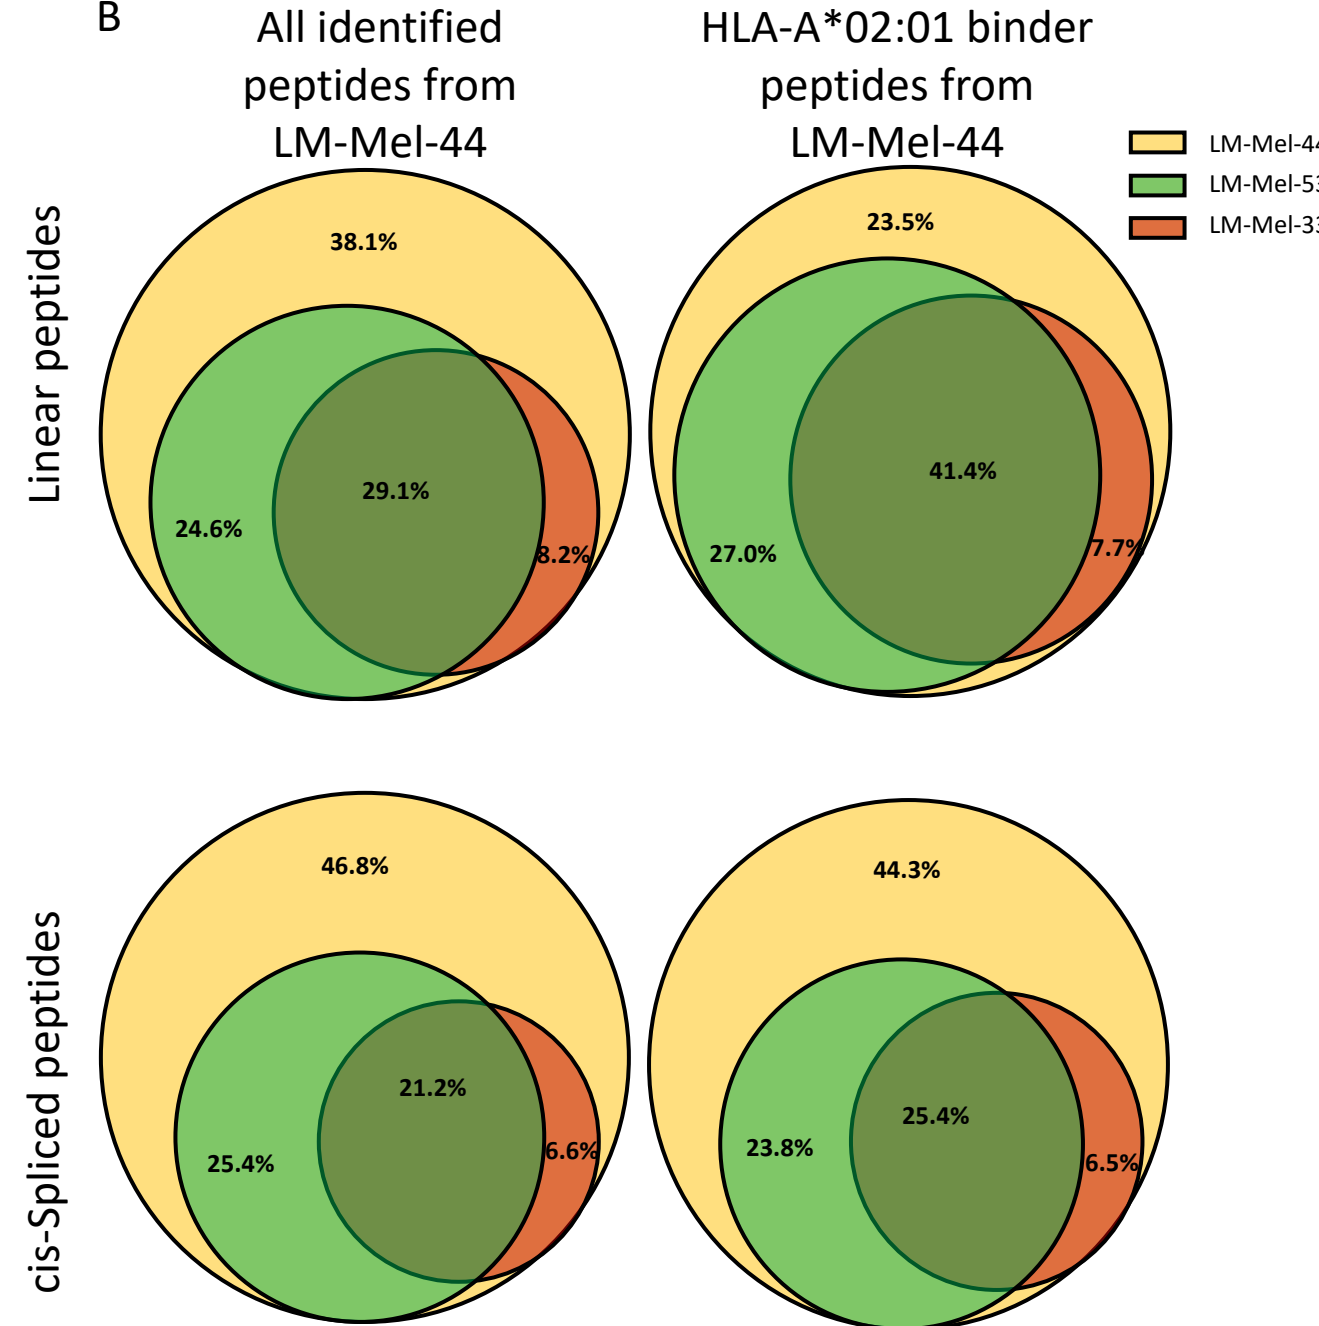

Fig.3

A

Linear peptides

cis-Spliced peptides

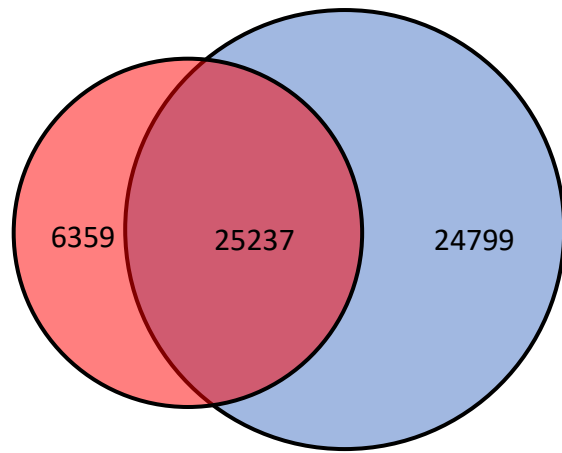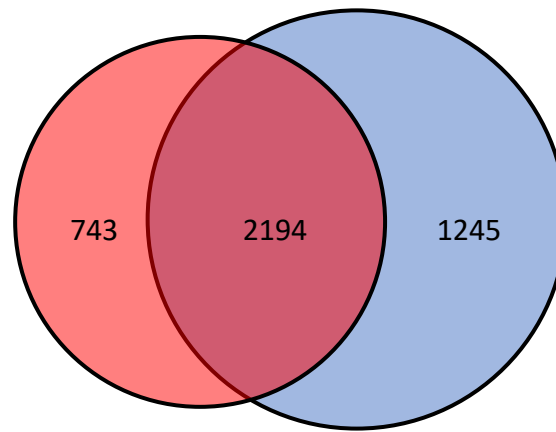

IFN- $\gamma$  untreated  
IFN- $\gamma$  treated

B

All peptides

HLA-A\*02:01

HLA-B\*40:01

Linear peptides  
Cis-Spliced peptides

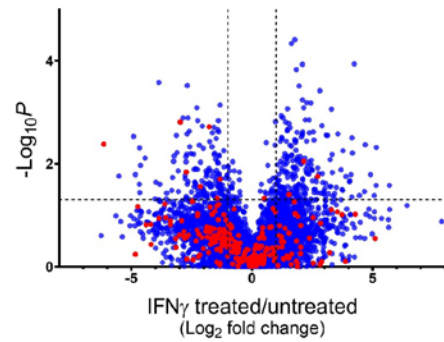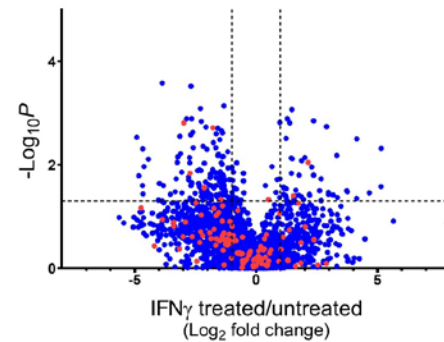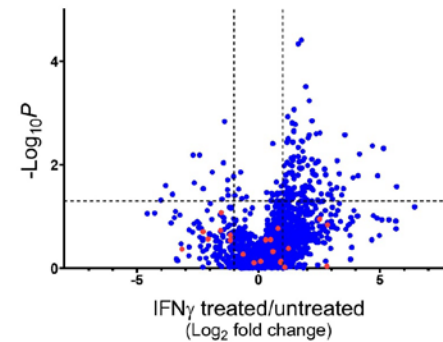

HLA-B\*44:02

HLA-C\*03:04

HLA-C\*05:01

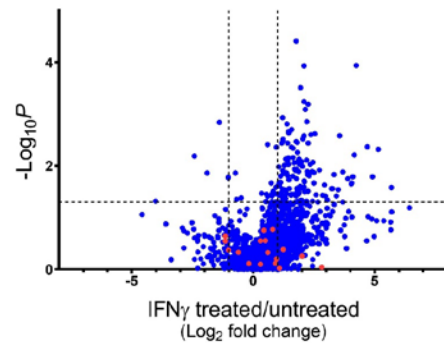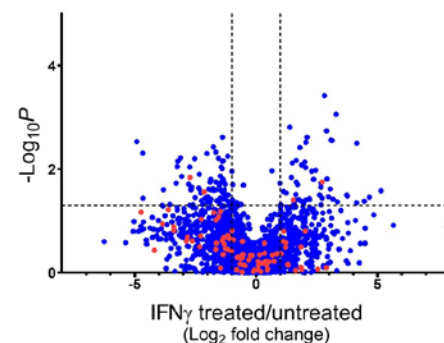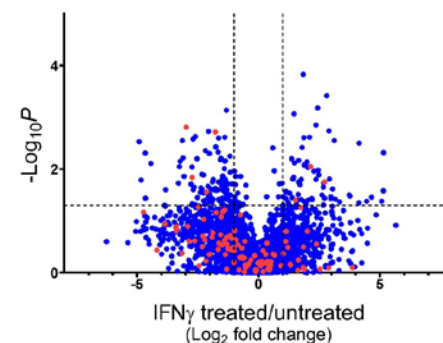



Fig.4

A

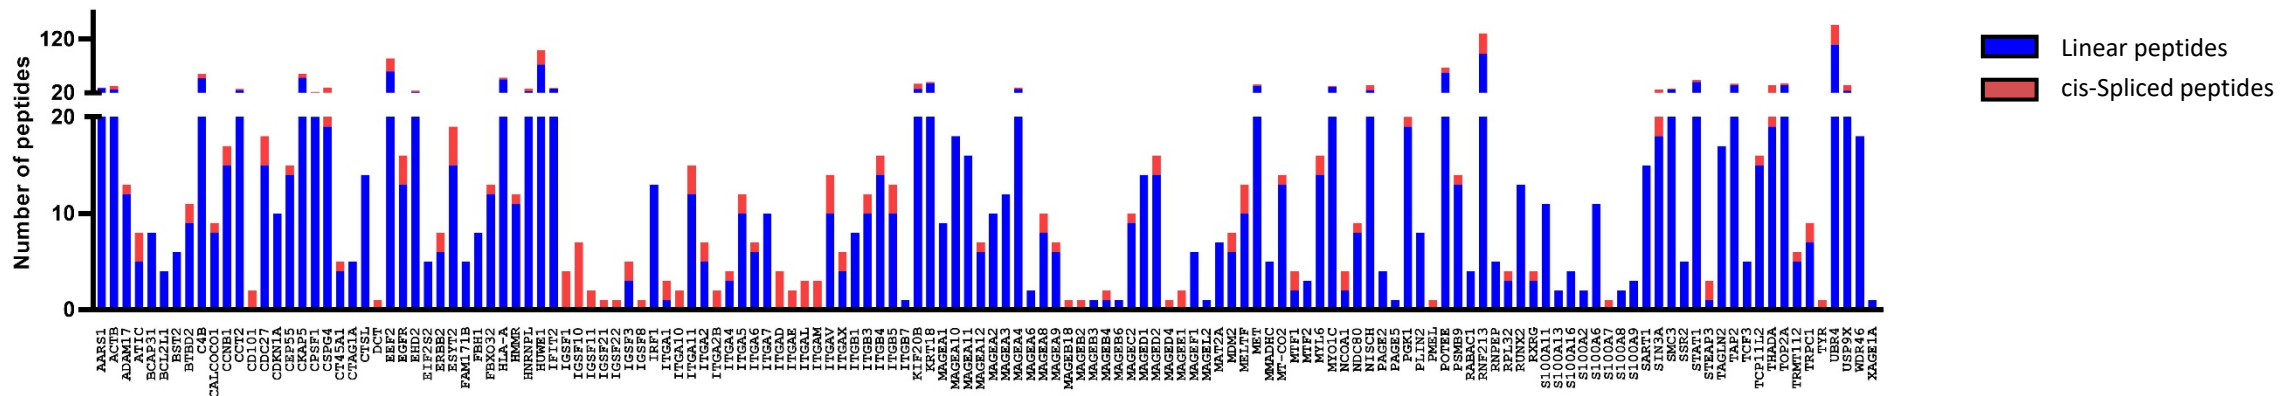

B

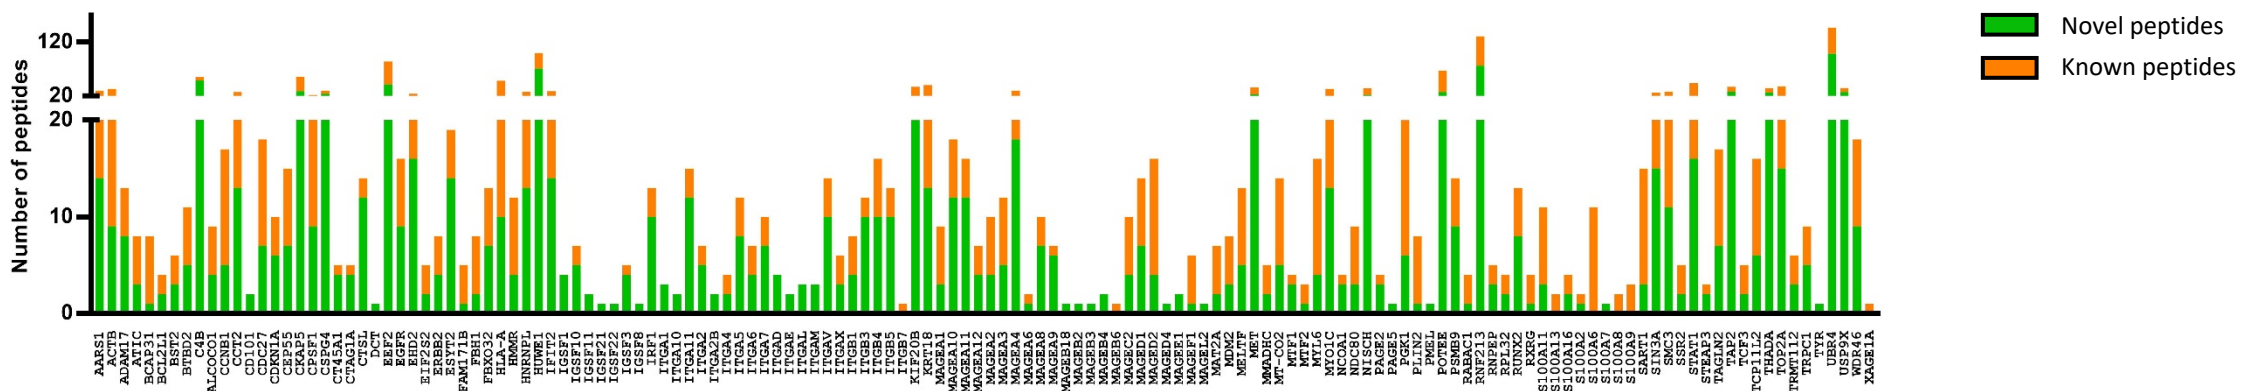

C

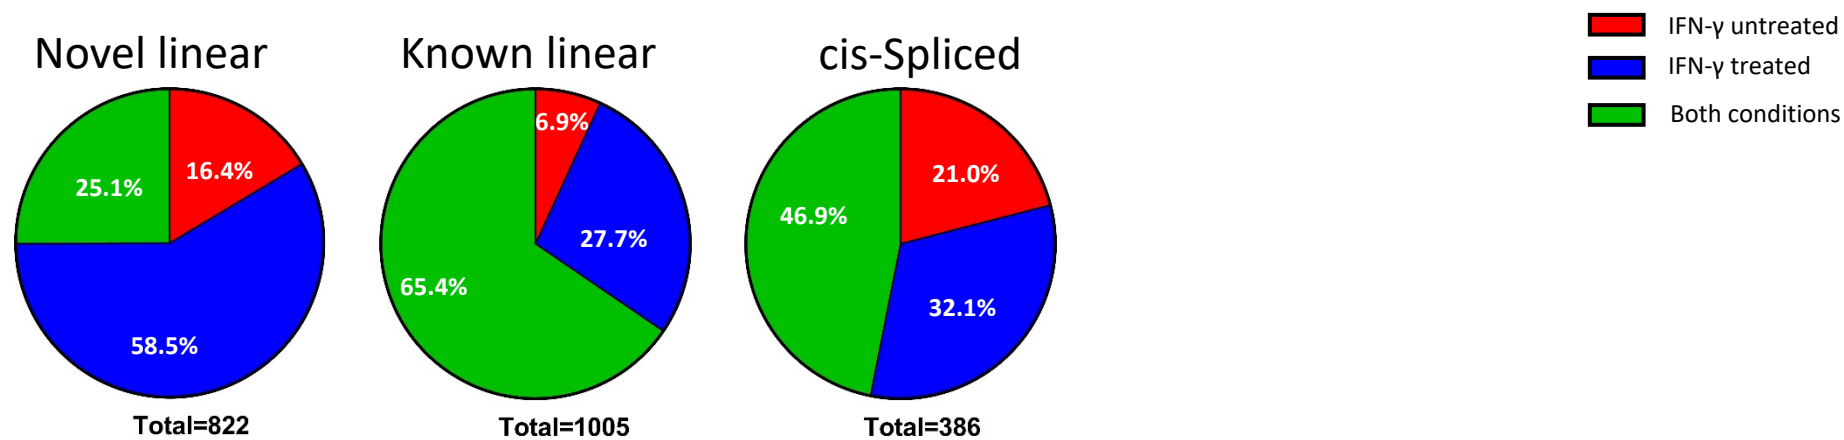

Fig.5

Constitutive proteasome genes – top quartile of CD3 expressing samples removed

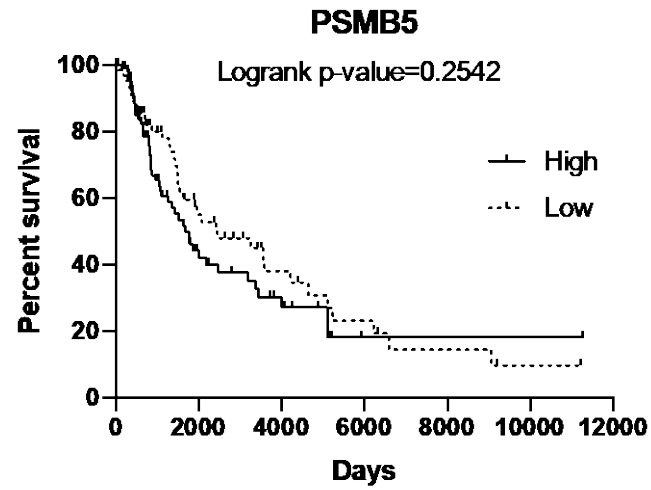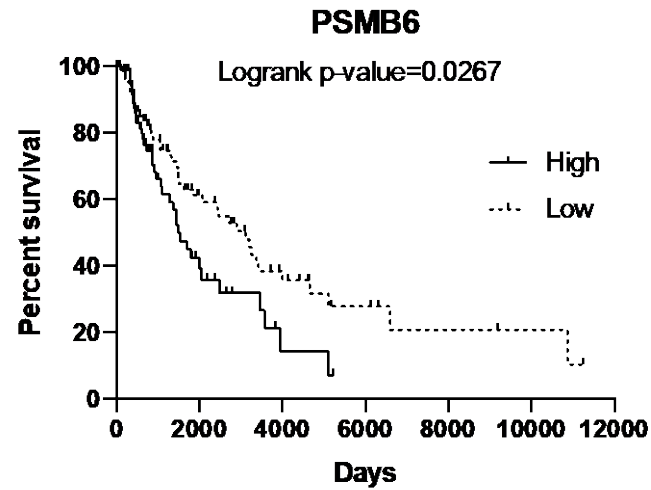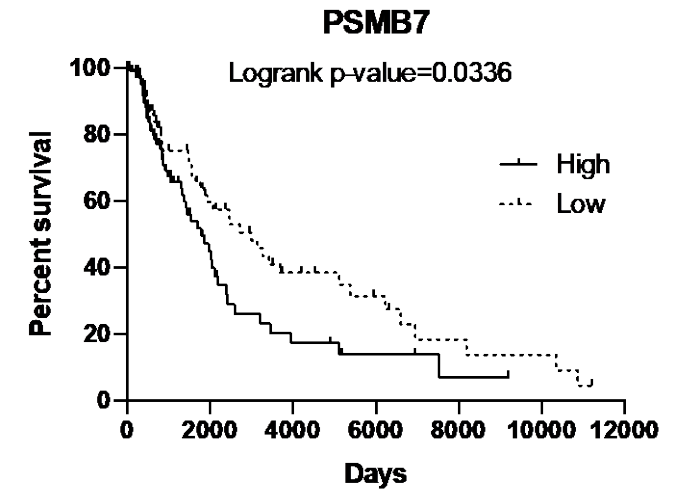

Immunoproteasome genes – top quartile of CD3 expressing samples removed

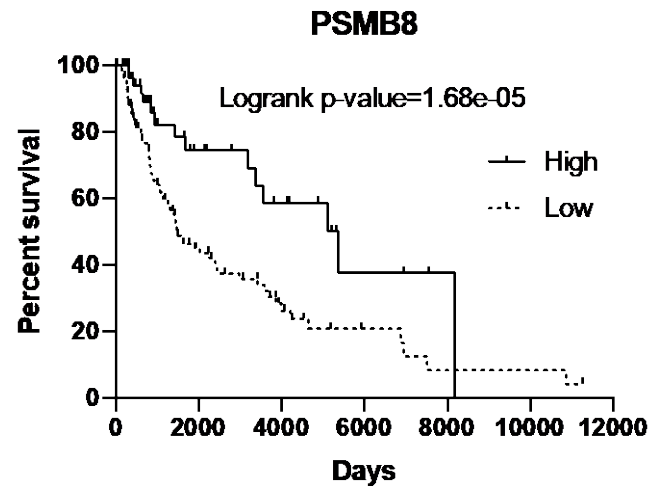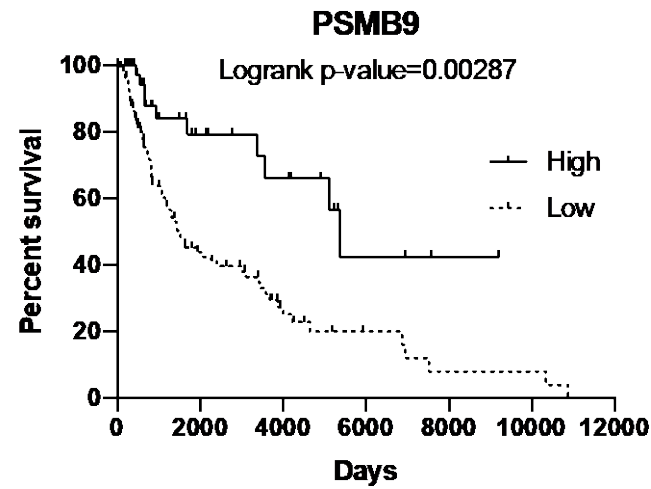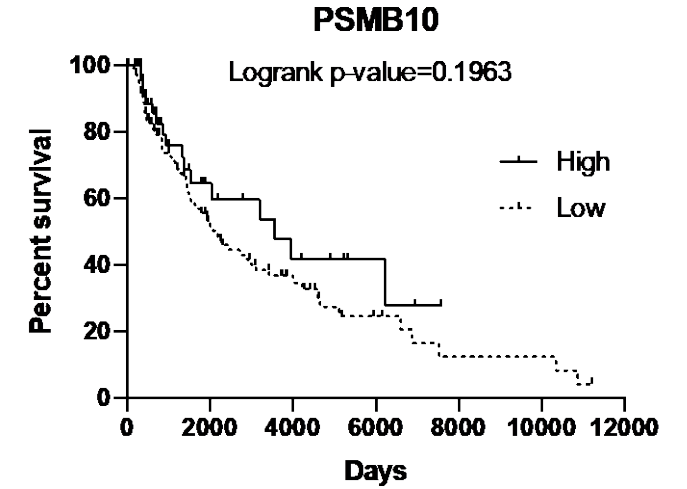

Fig.6

A

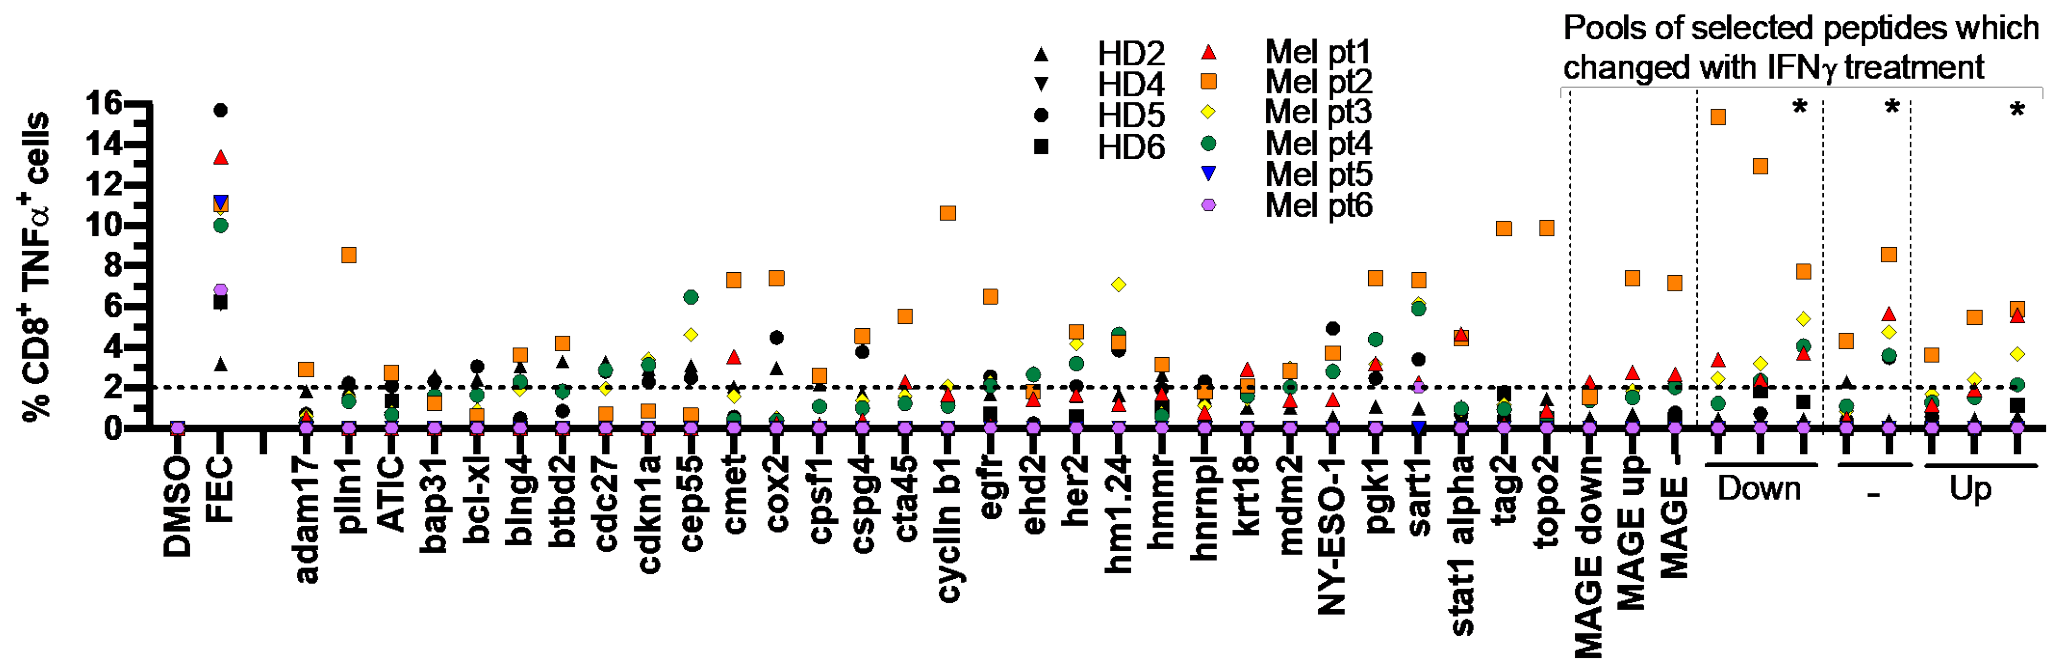

B

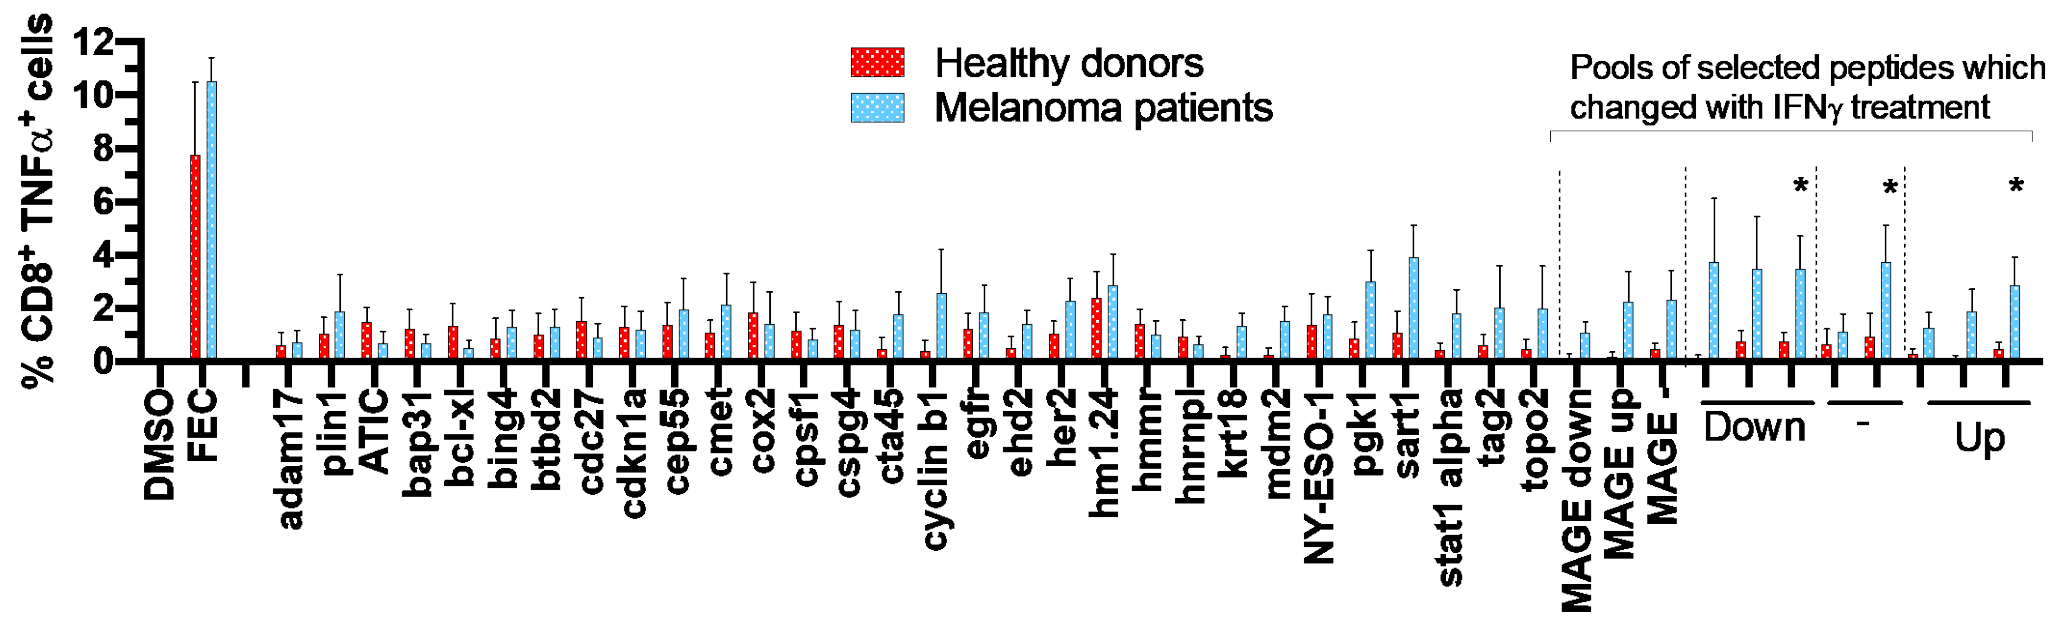

Fig.7

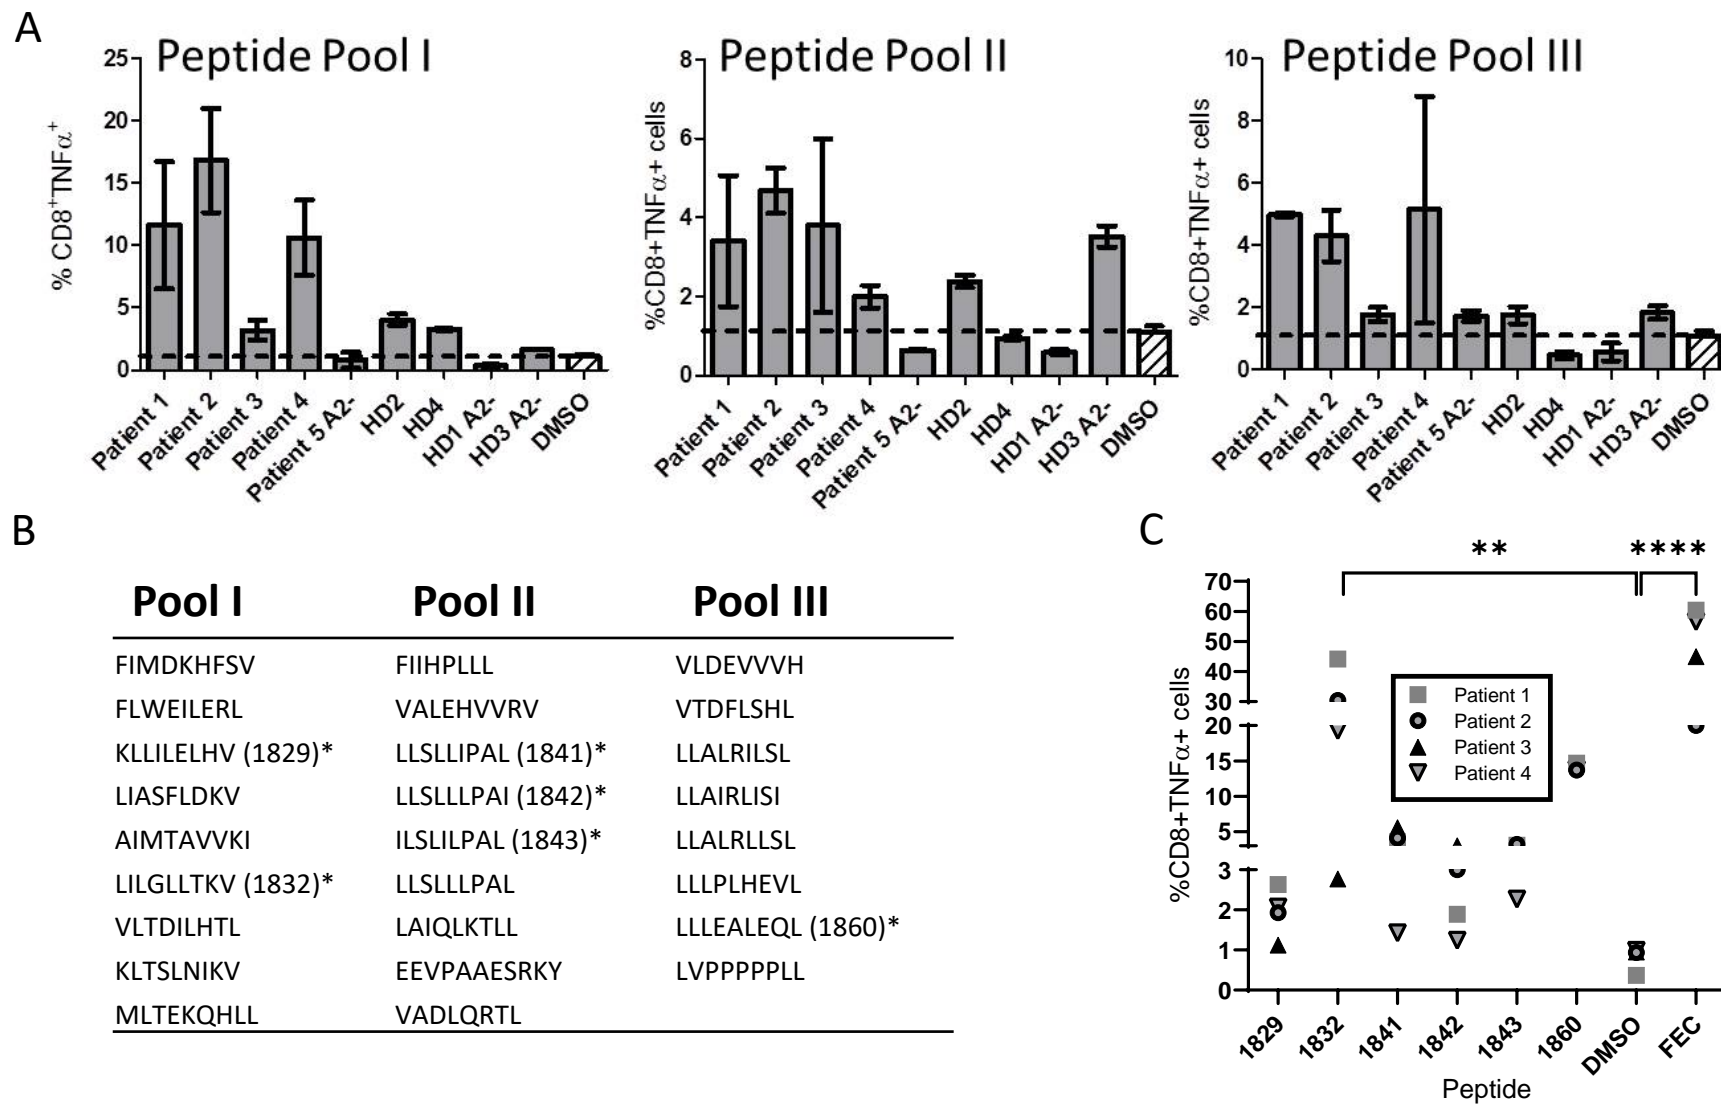

Fig.S1

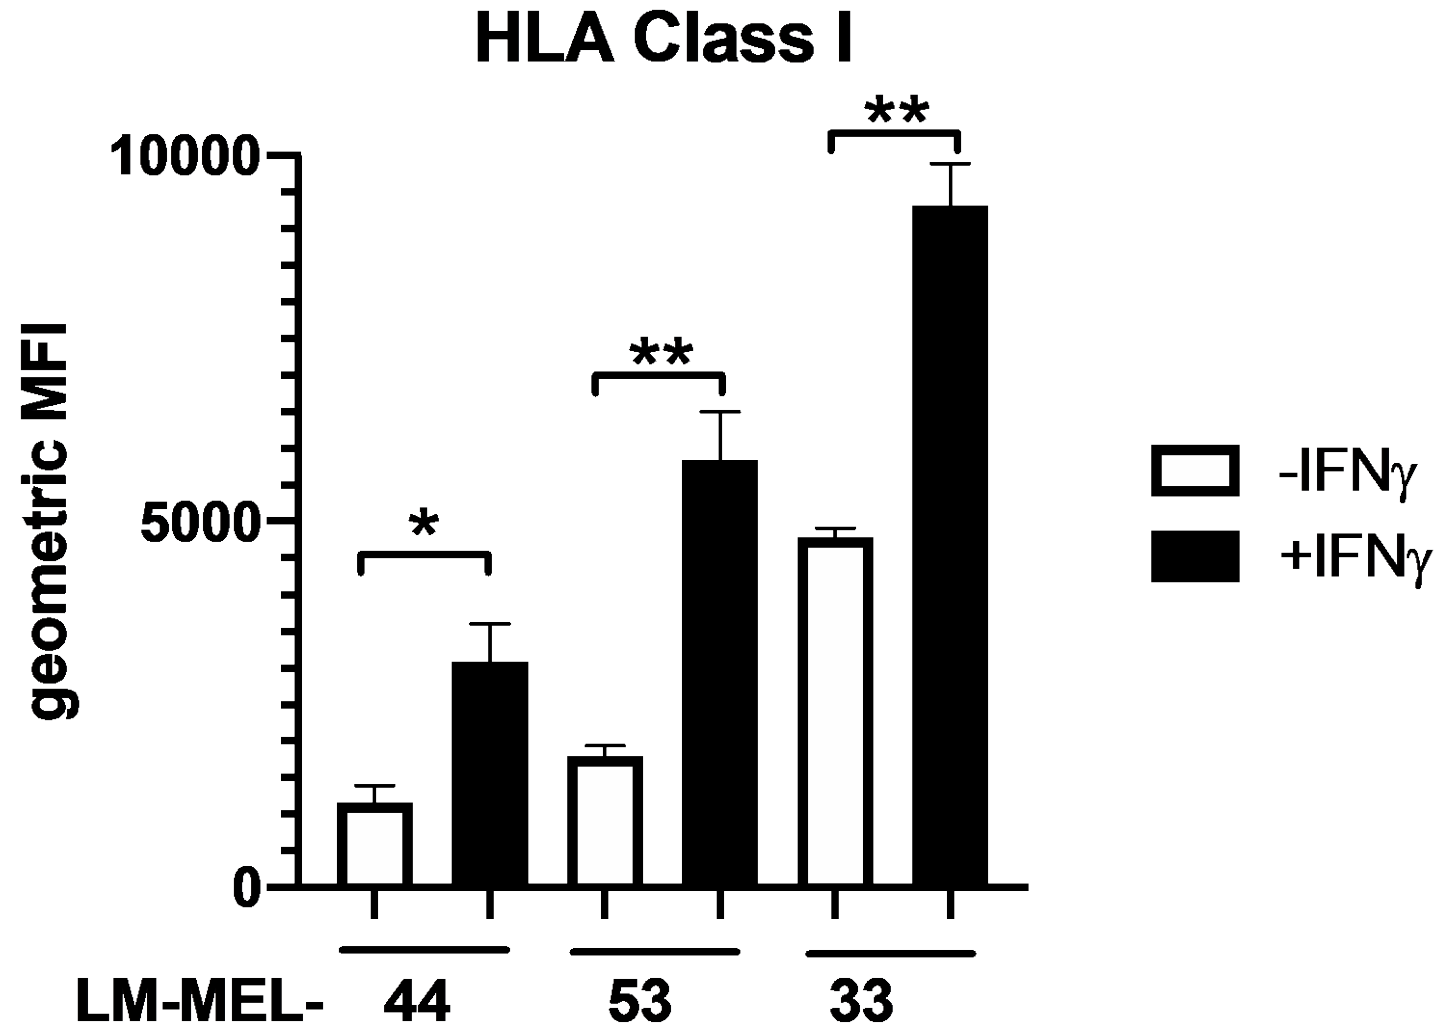

Fig.S2

Constitutive proteasome genes

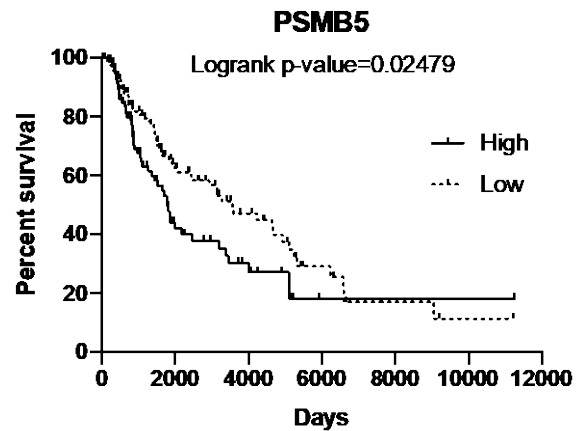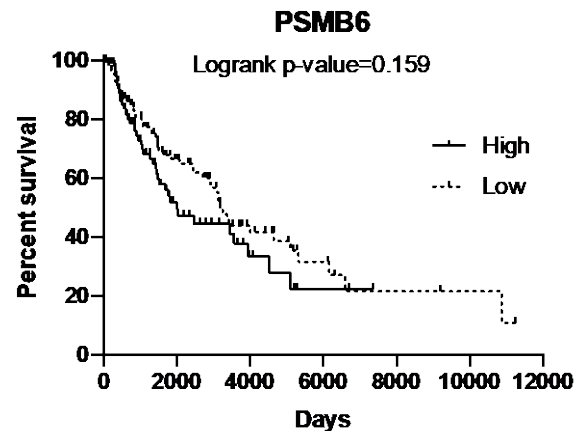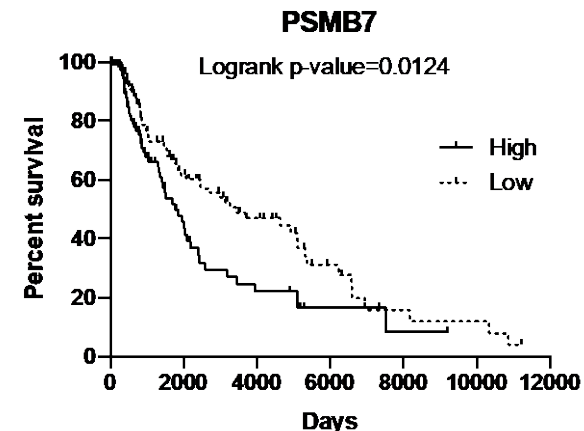

Immunoproteasome genes

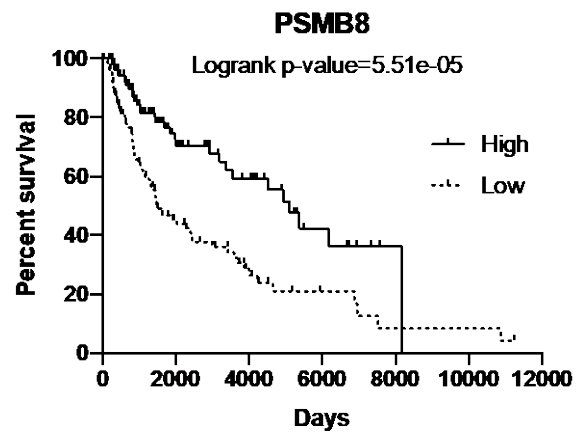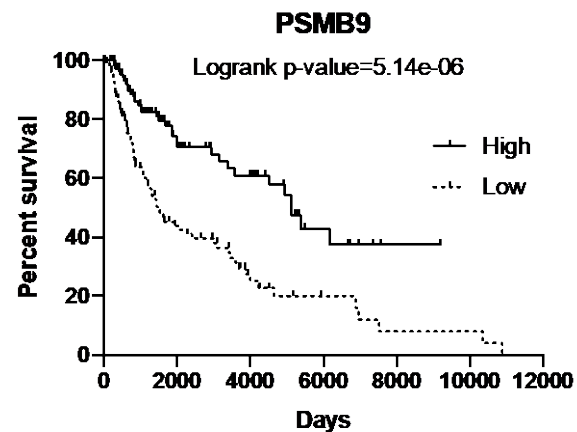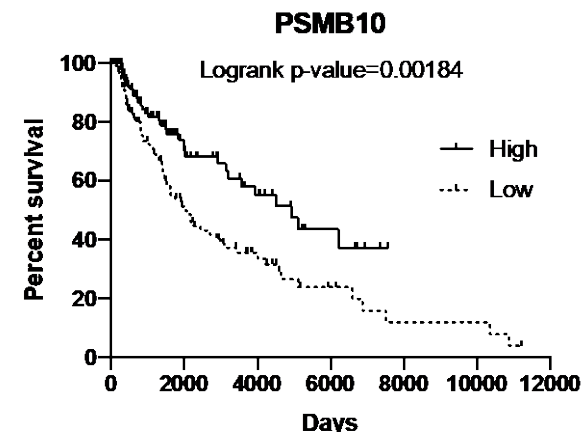

Fig.S3

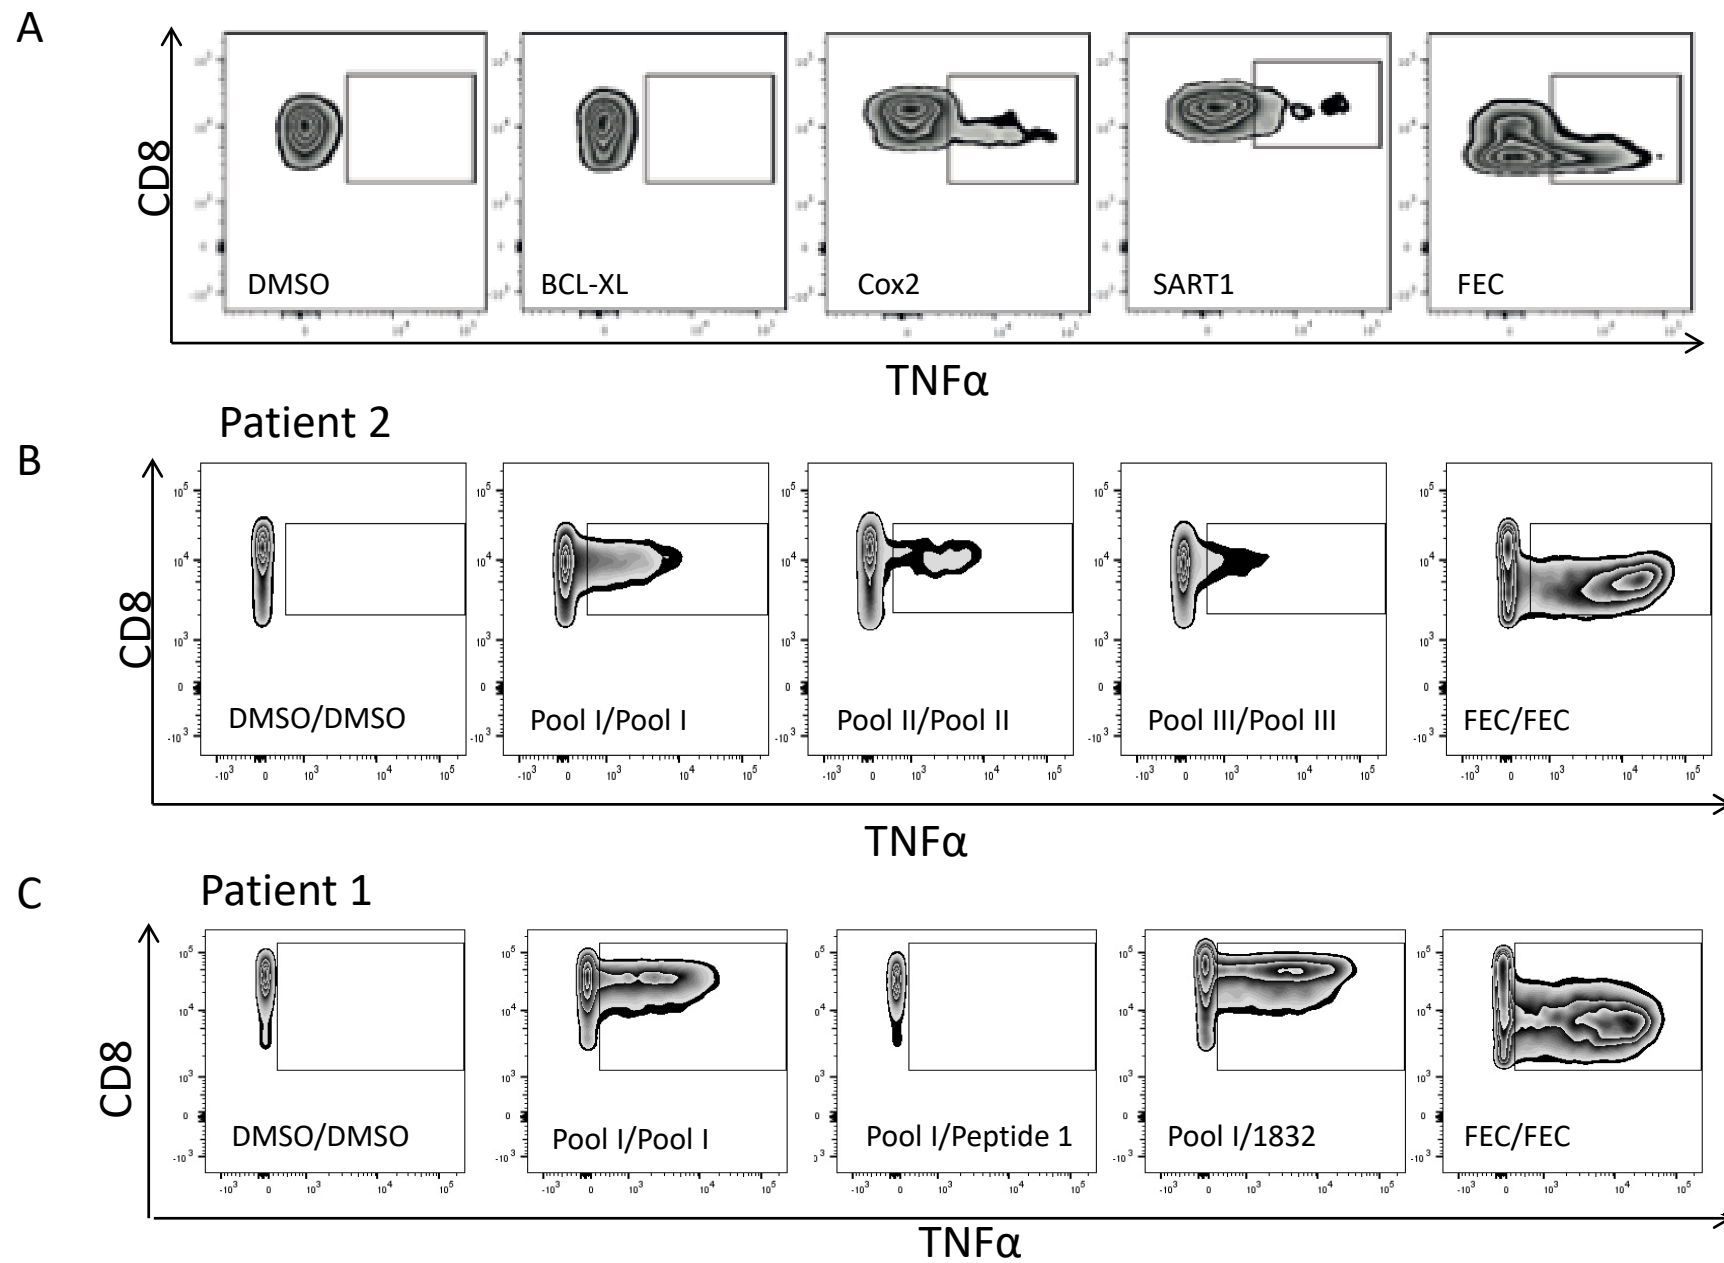

Fig.S4

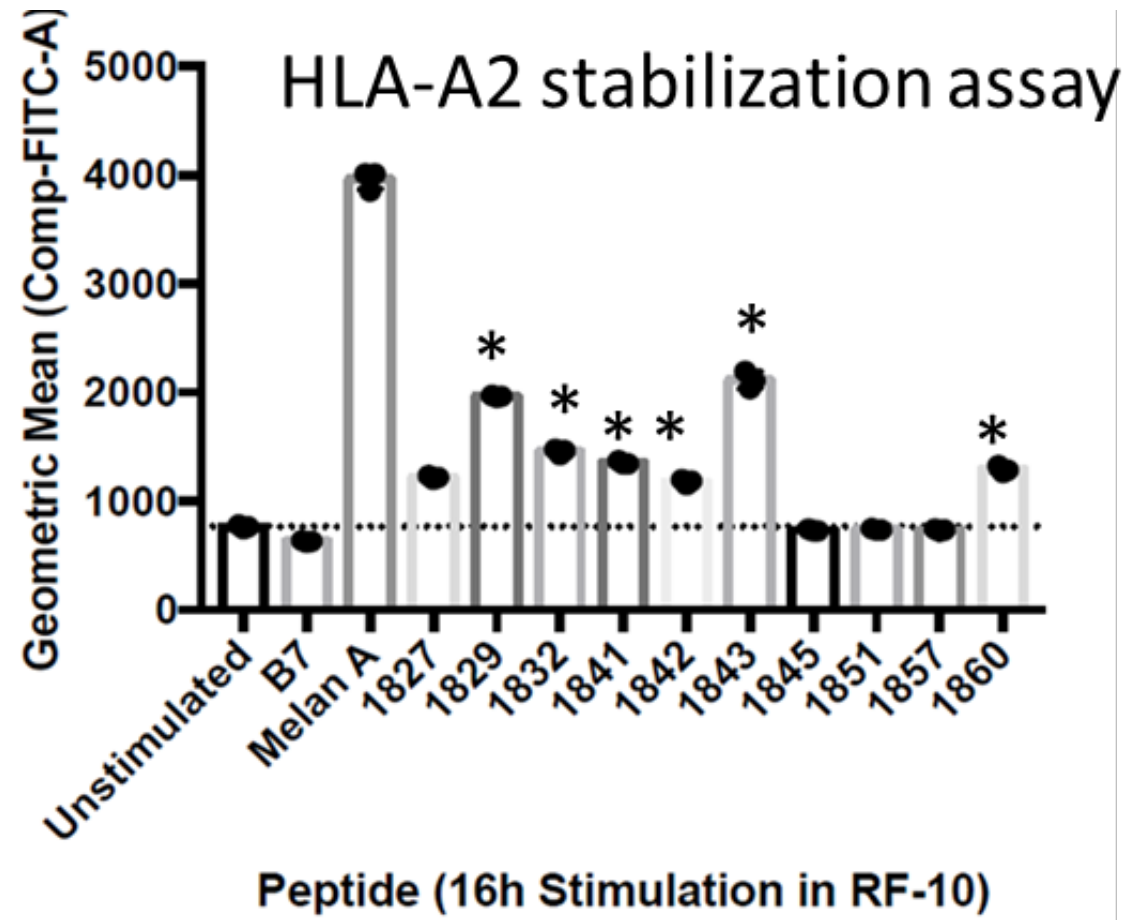



Fig.S5

A

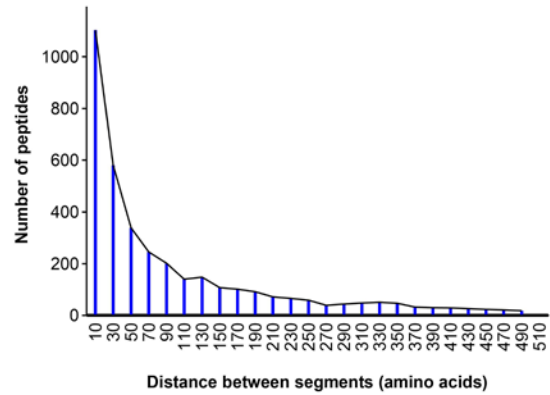

B

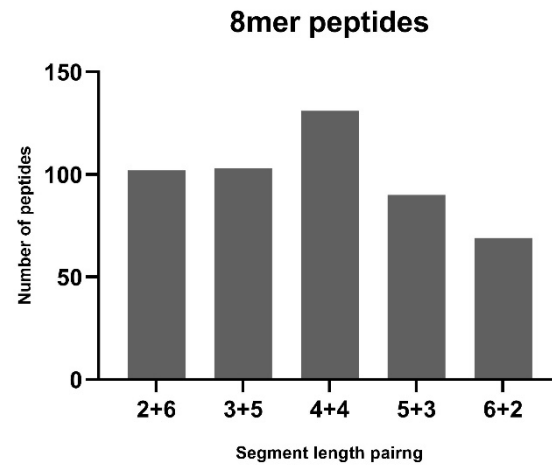

C

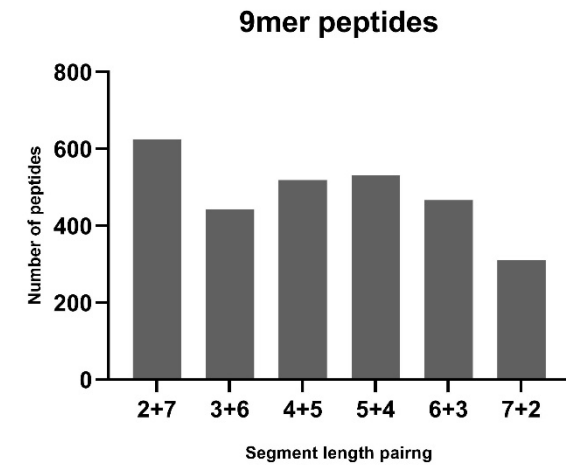

D

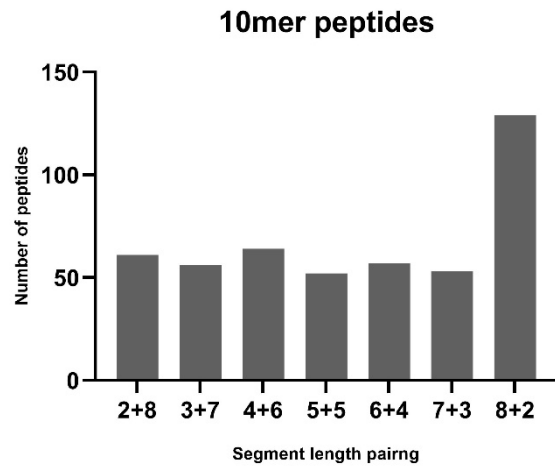

E

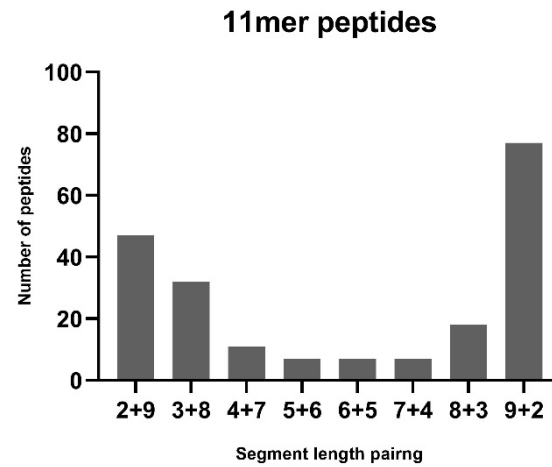

F

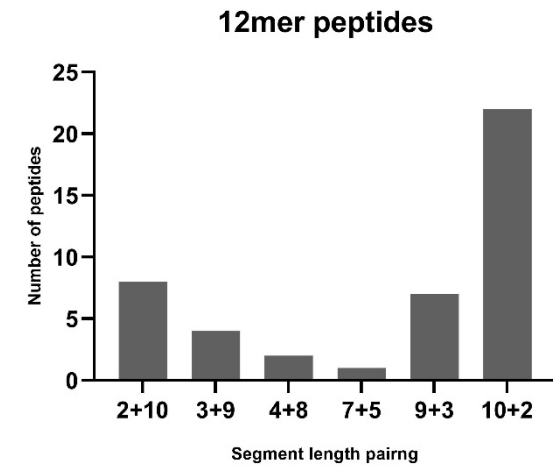

Fig.S6

A

General gating strategy

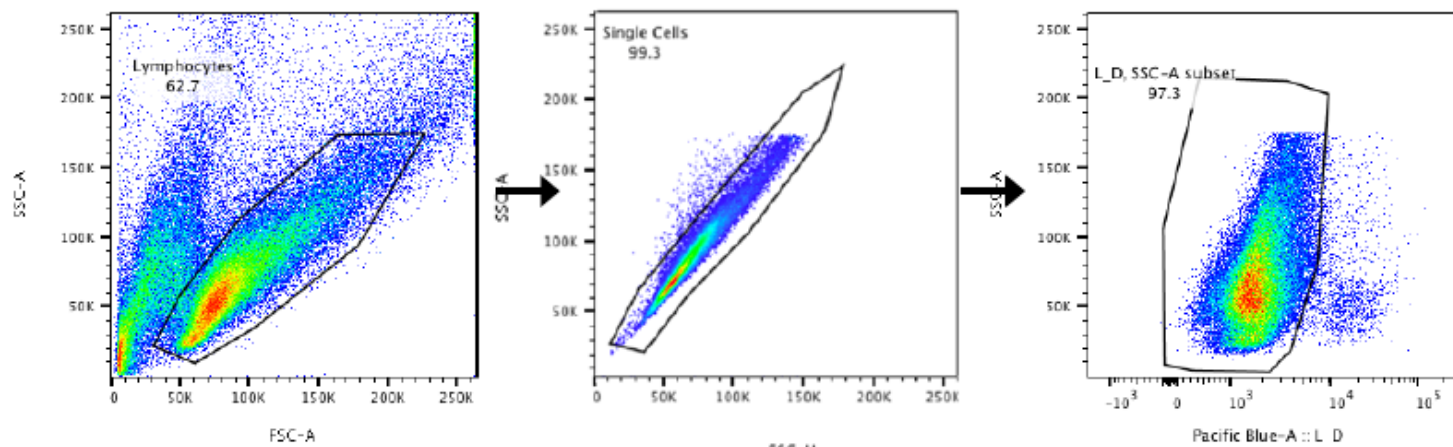

B

DMSO

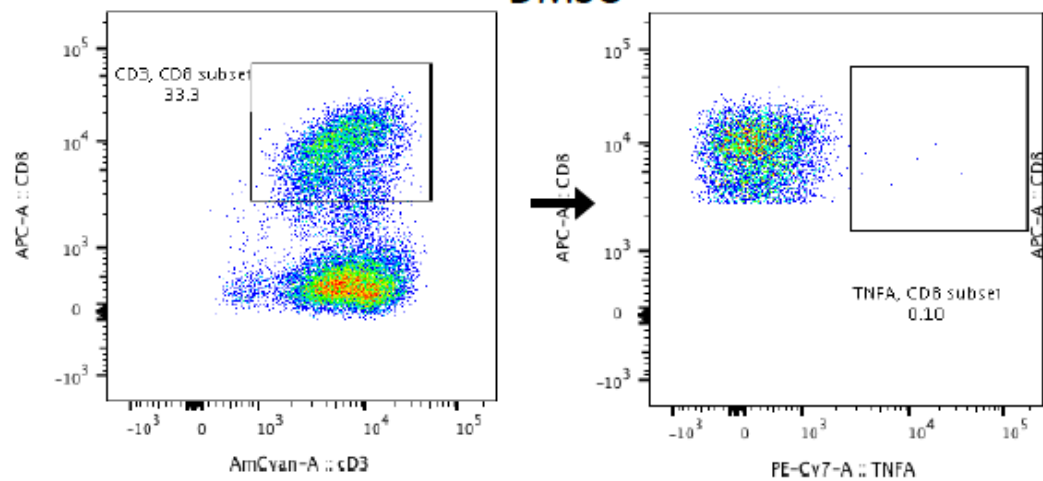

C

Positive peptide example

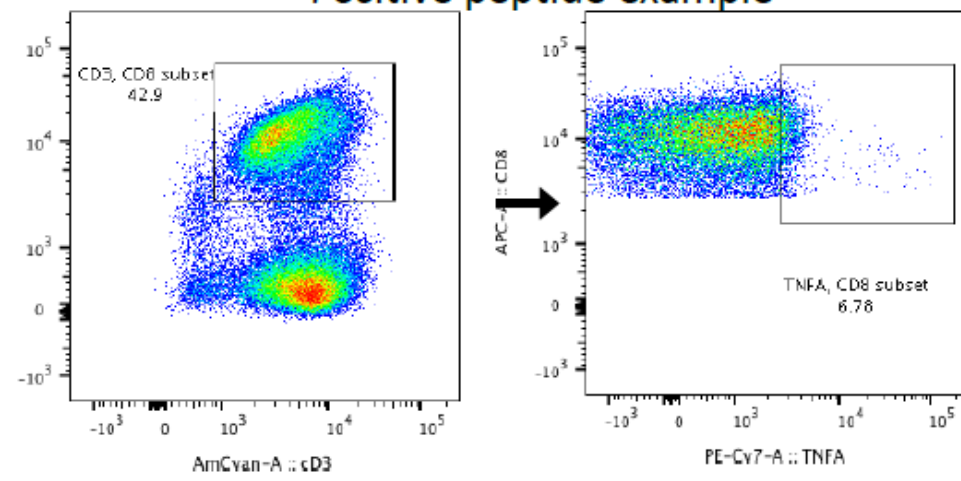

Fig.S7

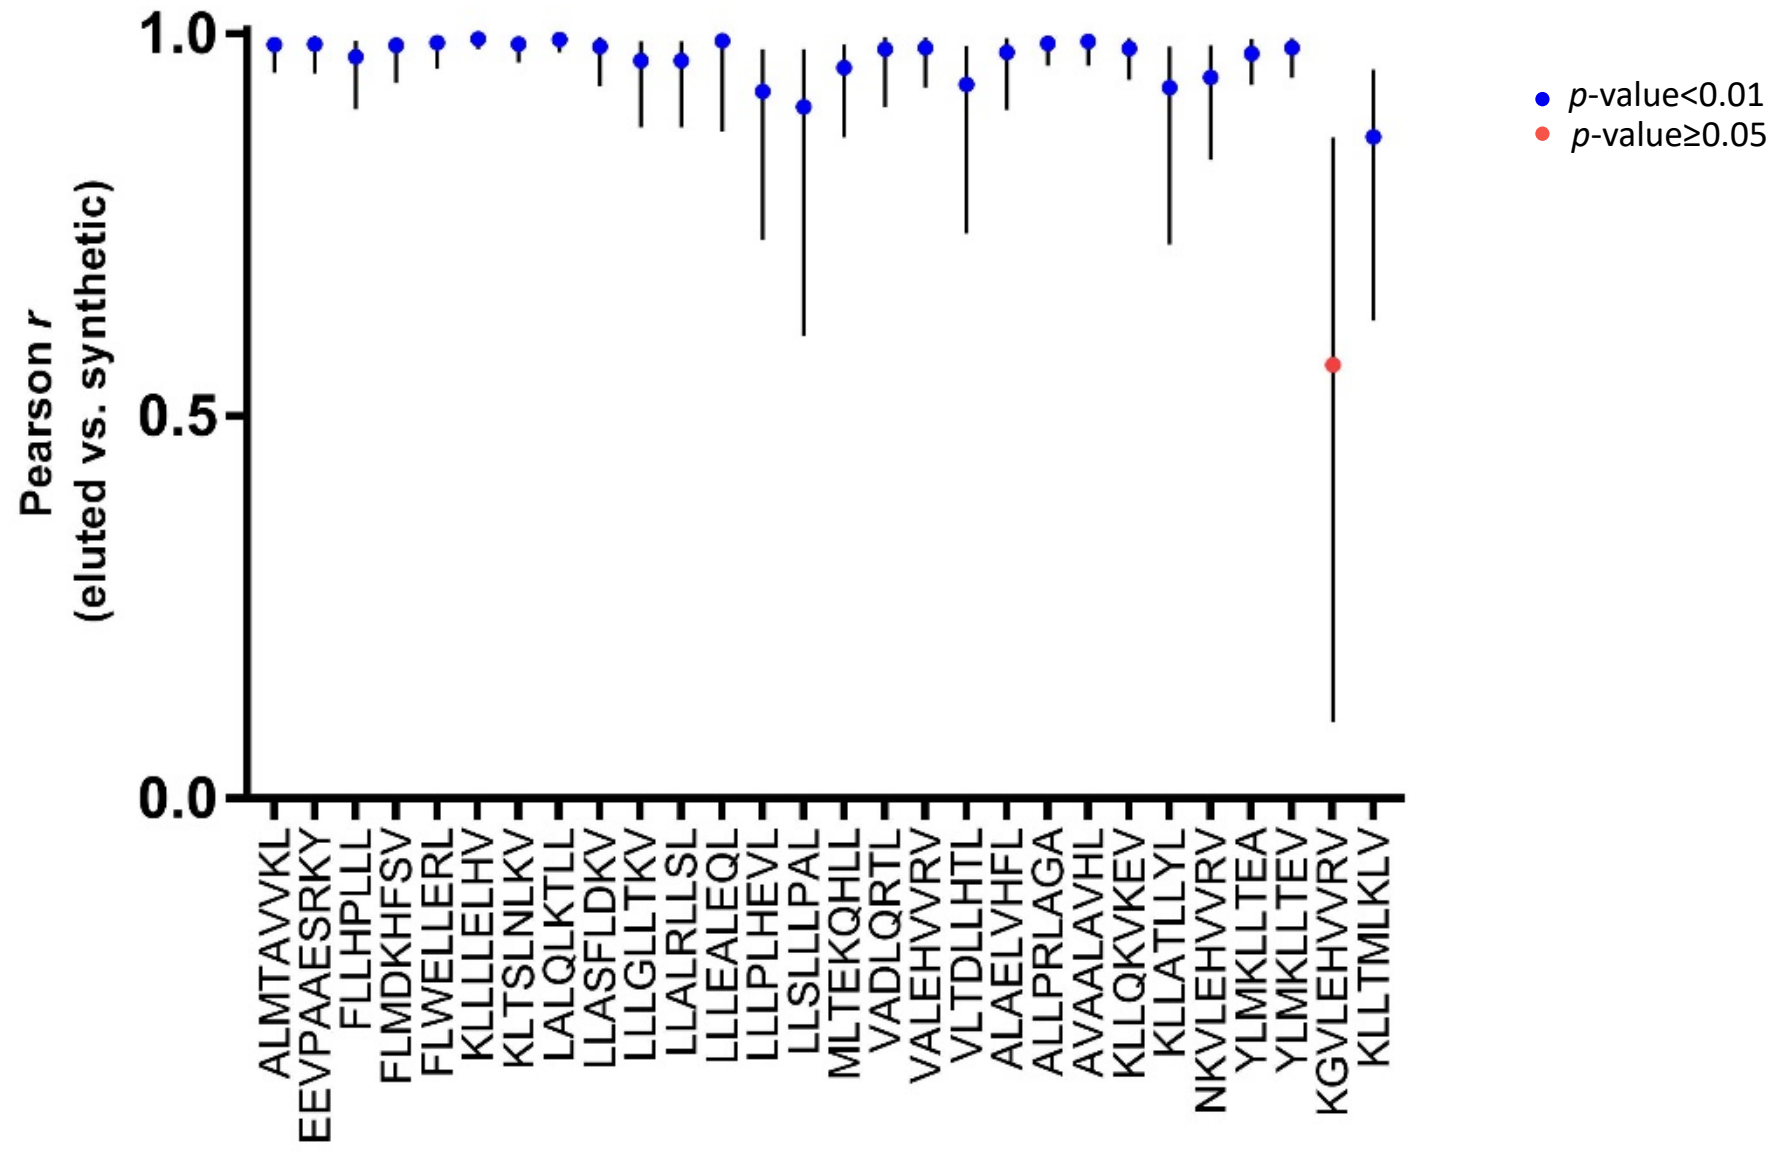

Eluted peptide

Synthetic peptide

FLMDKHFSV

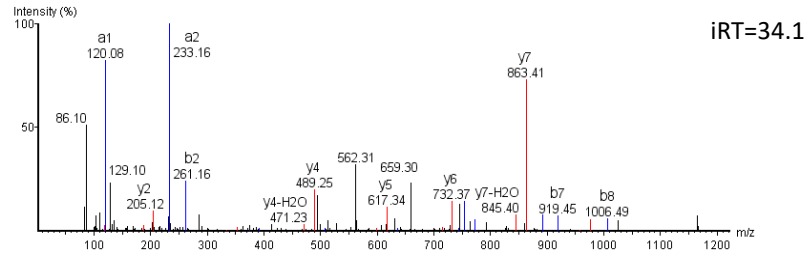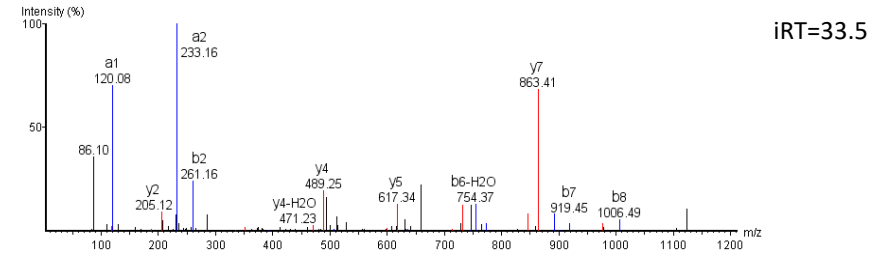

FLWELLERL

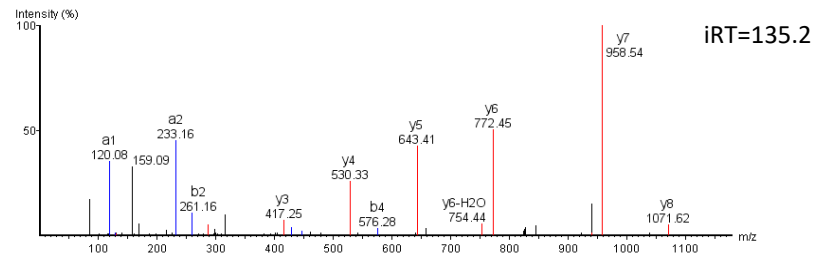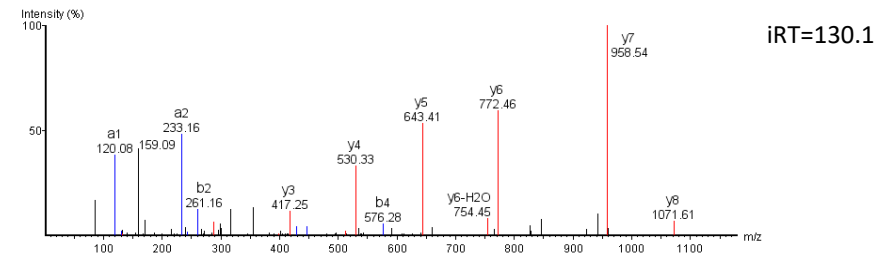

KLLLLLHV

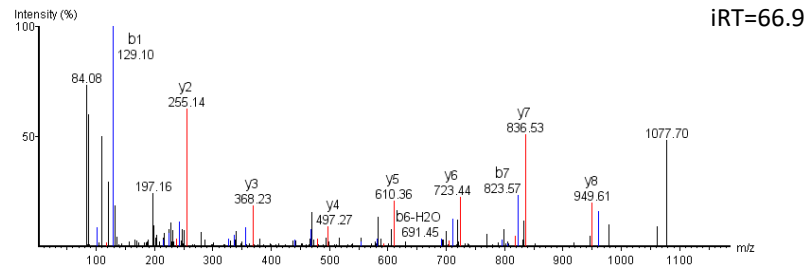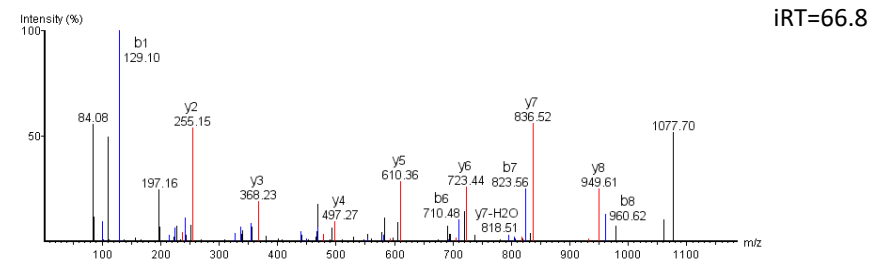

Eluted peptide

Synthetic peptide

LLASFLDKV

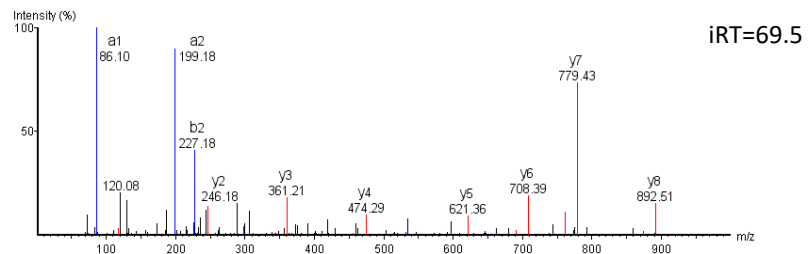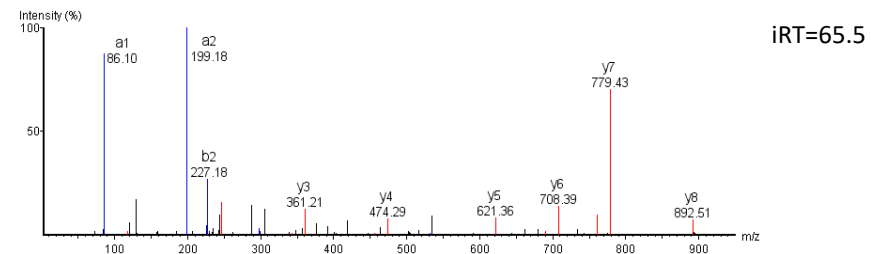

ALMTAVVKL

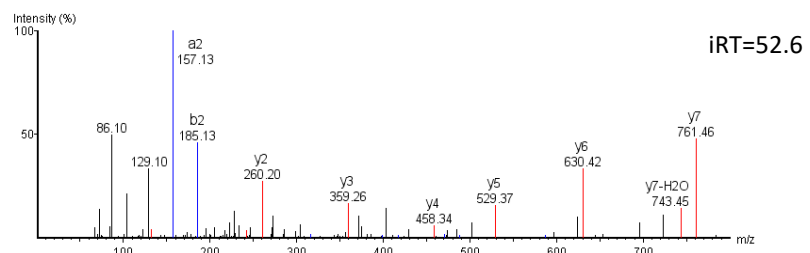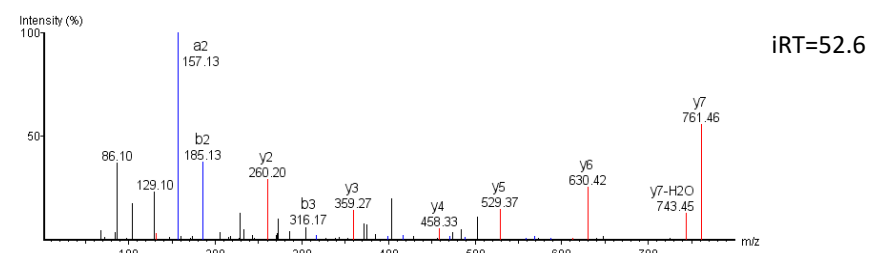

LLLGLLTKV

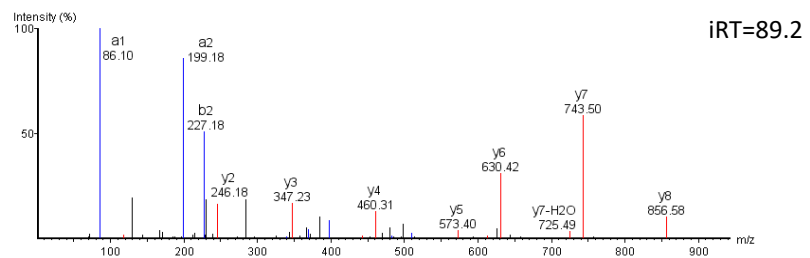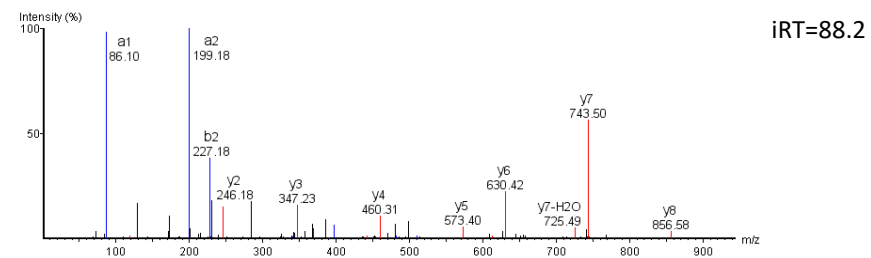

Eluted peptide

Synthetic peptide

VLTDLLHTL

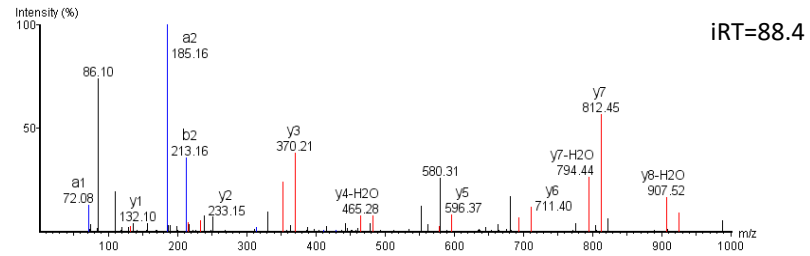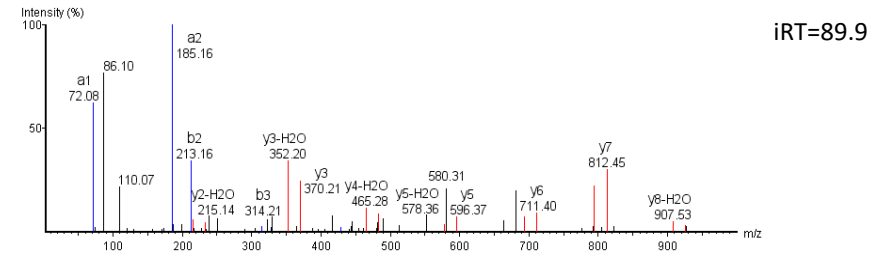

KLTSLNLIKV

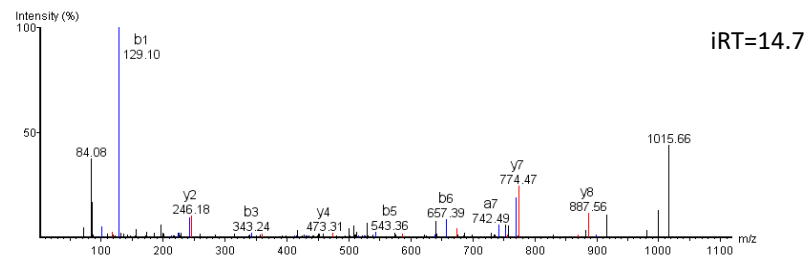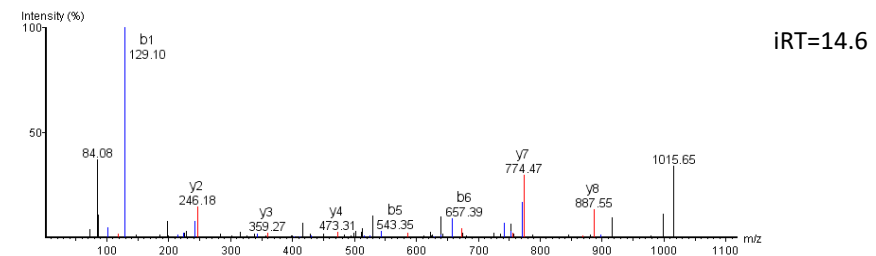

MLTEKQHLL

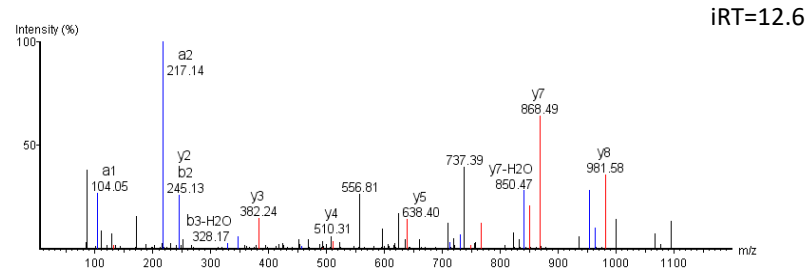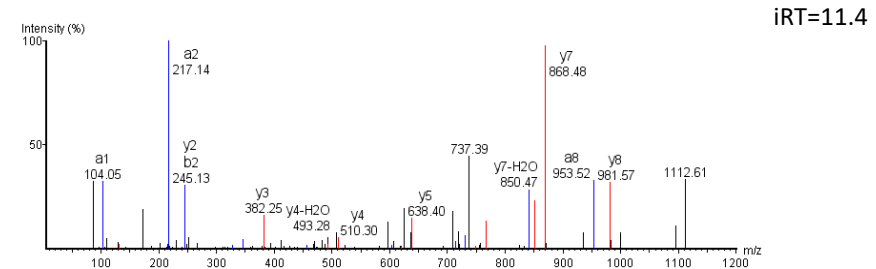

Eluted peptide

Synthetic peptide

FLLHPLLL

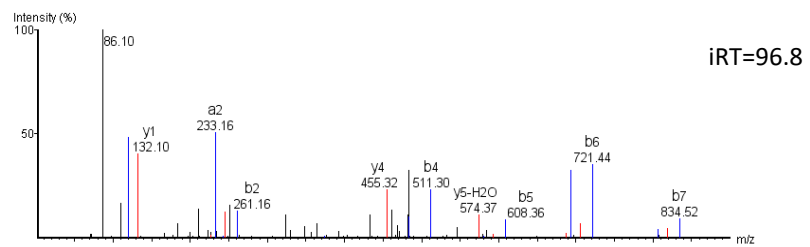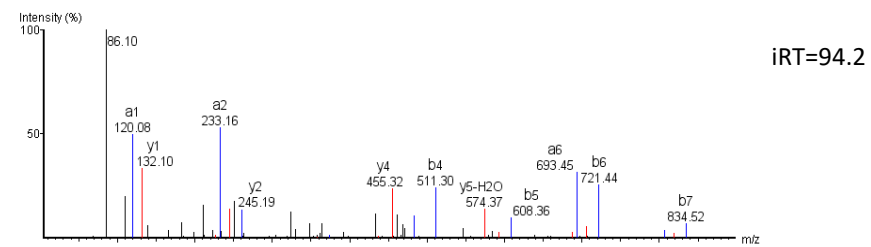

VALEHVVRV

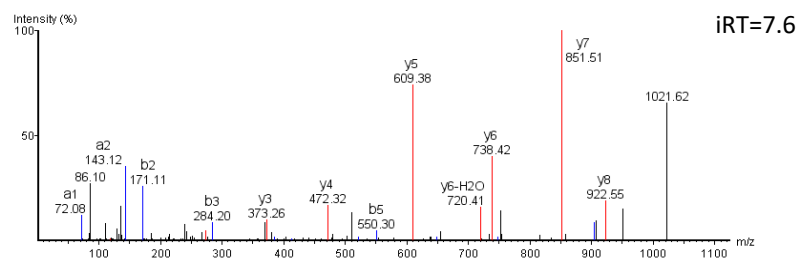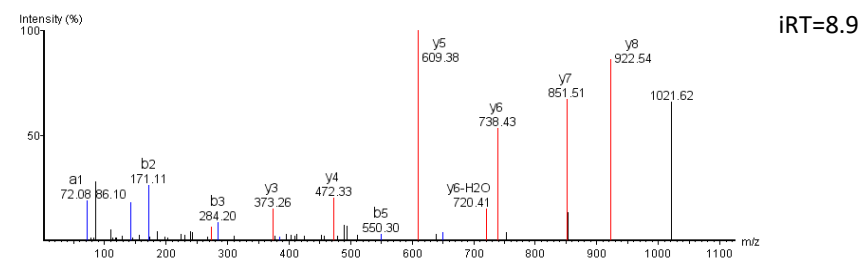

LLSLLLPA

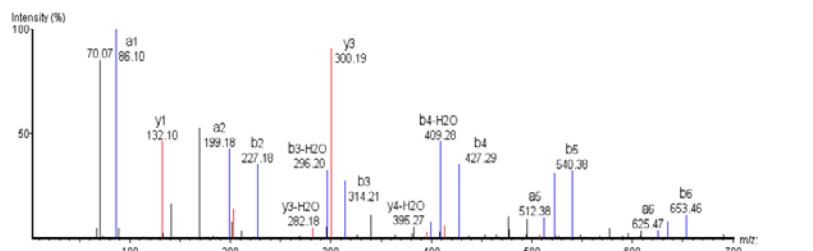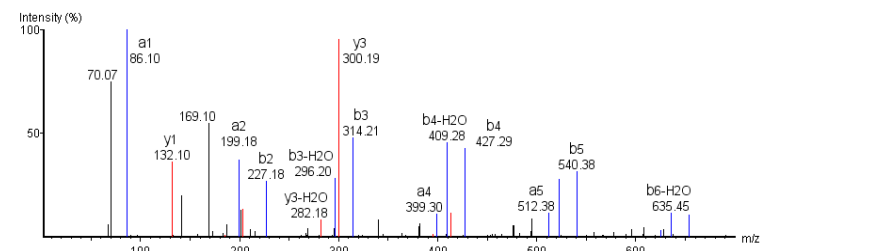

Eluted peptide

Synthetic peptide

LALQLKTL

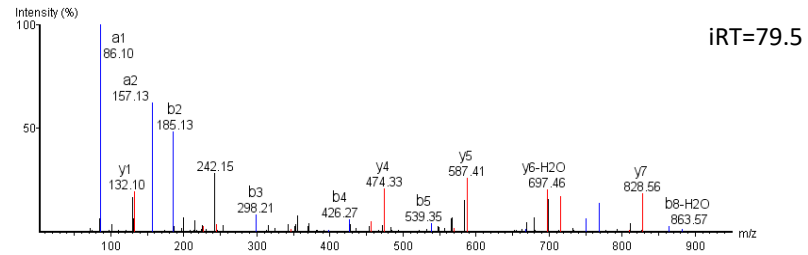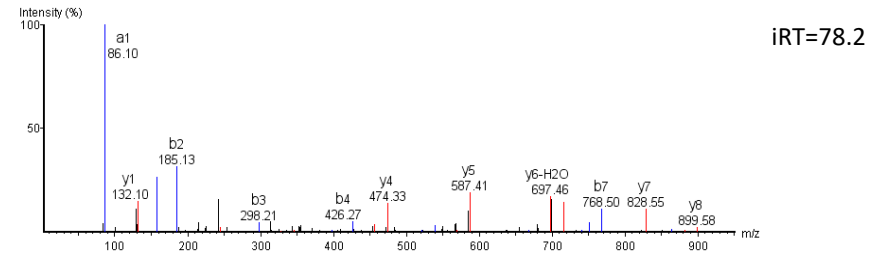

EEVPAESRKY

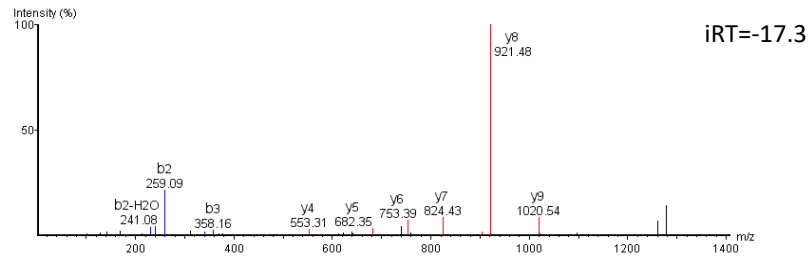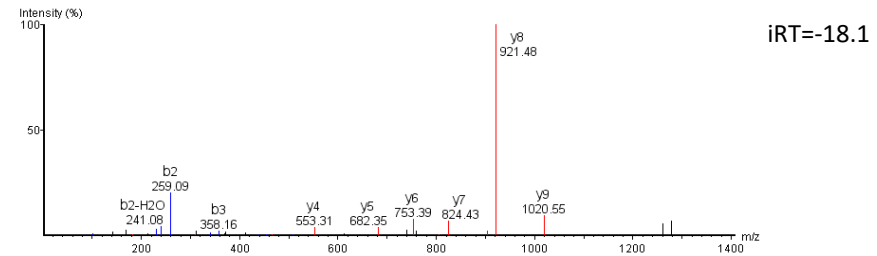

VADLQRTL

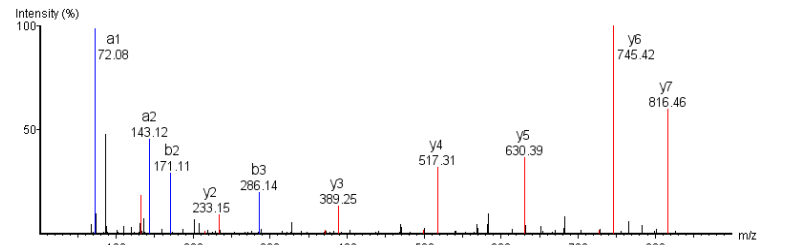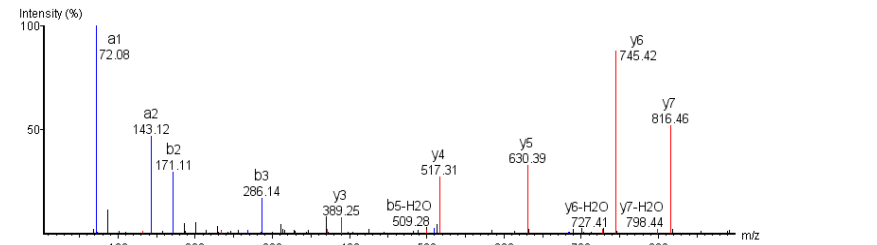



Eluted peptide

Synthetic peptide

LLLPLHEVL

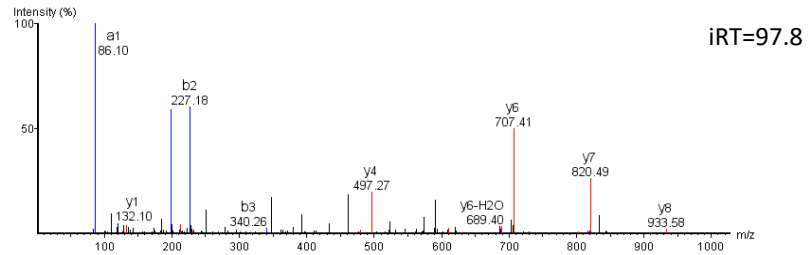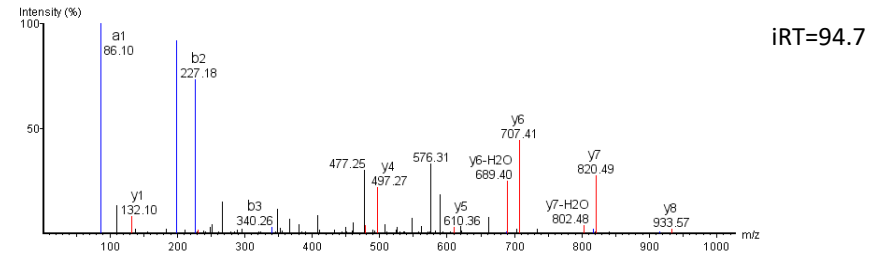

LLLEALEQL

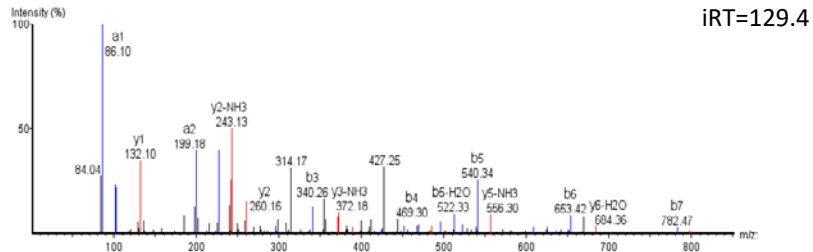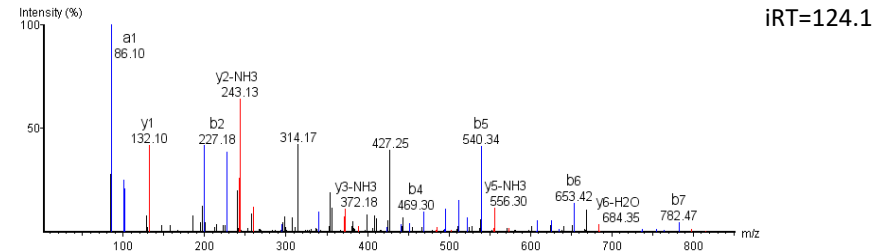

KLLTMLKLV

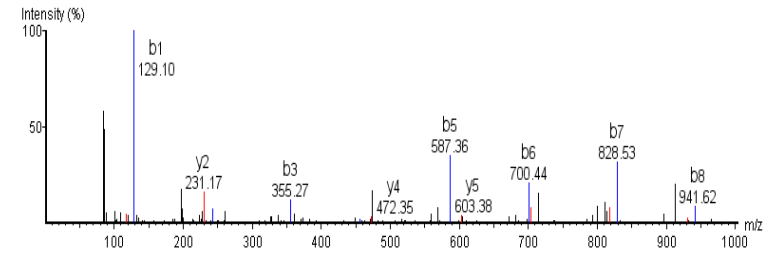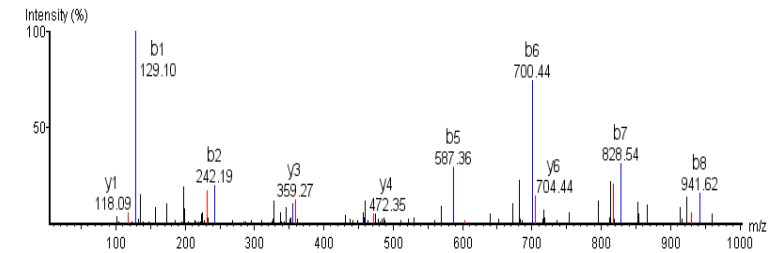

### Eluted peptide

ALAELVHFL

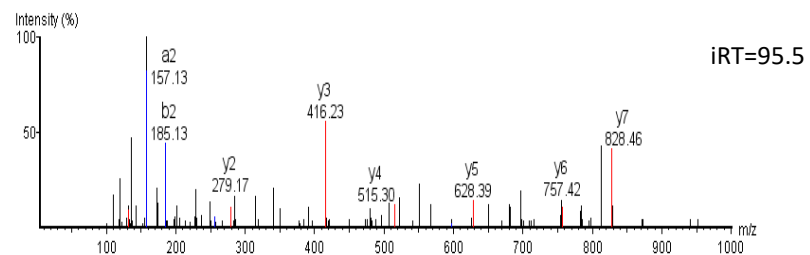

### Synthetic peptide

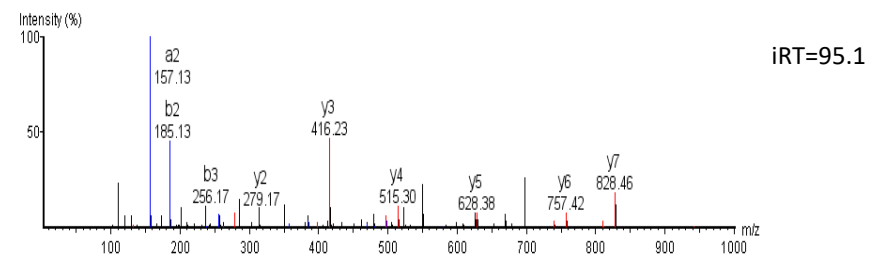

ALLPRLAGA

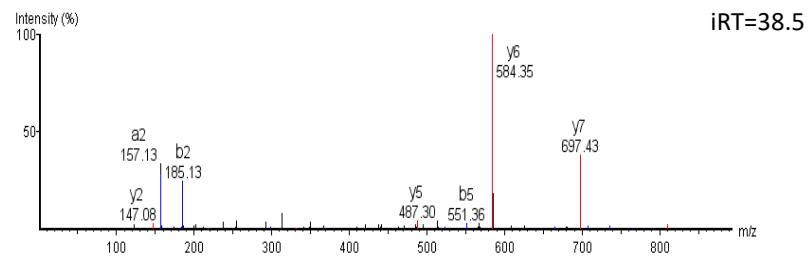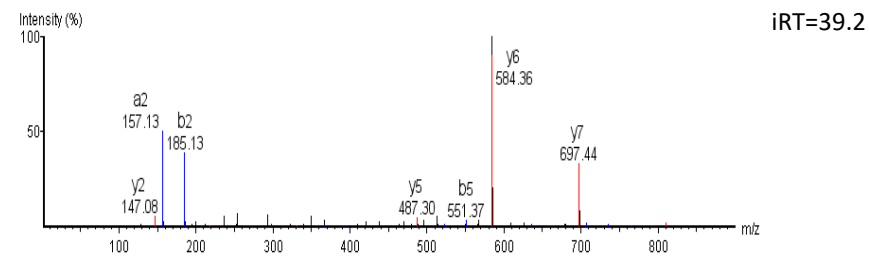

AVAALAVHL

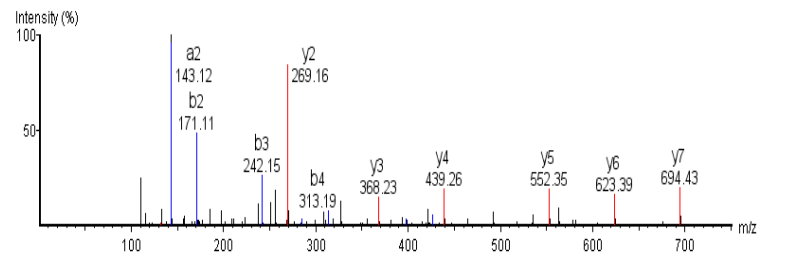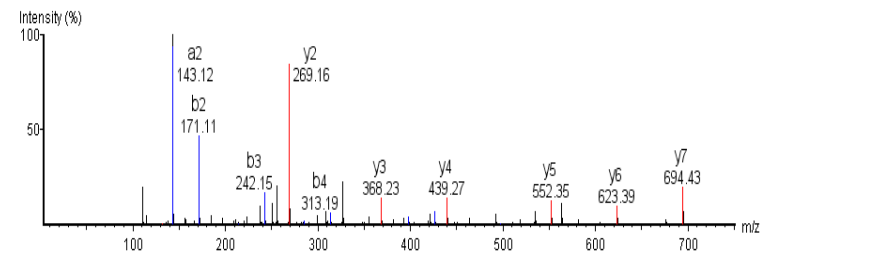

Eluted peptide

Synthetic peptide

KLLQKVKEV

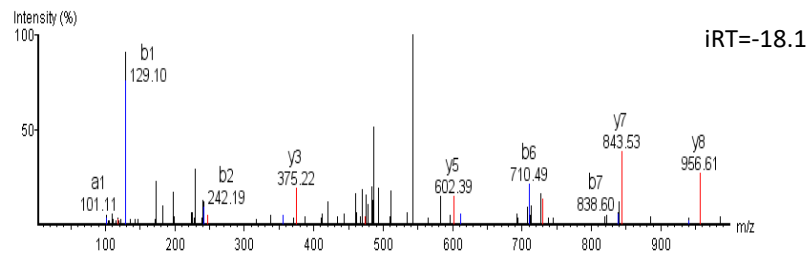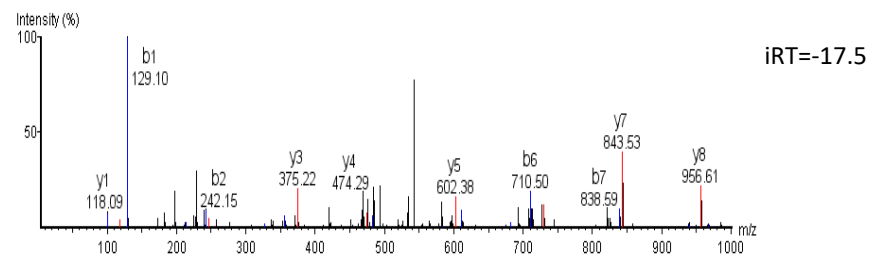

KLLATLLYL

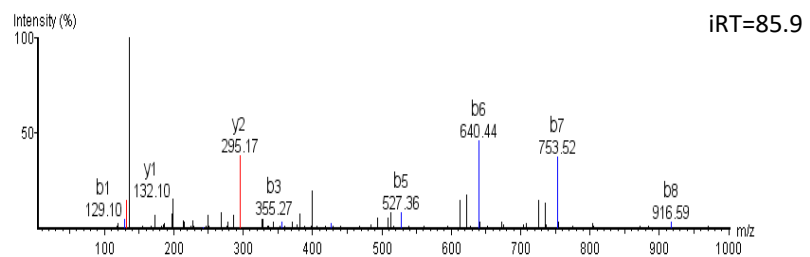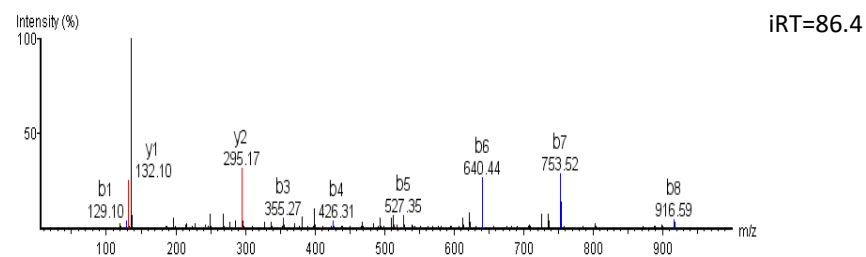

NKLVLEHVVRV

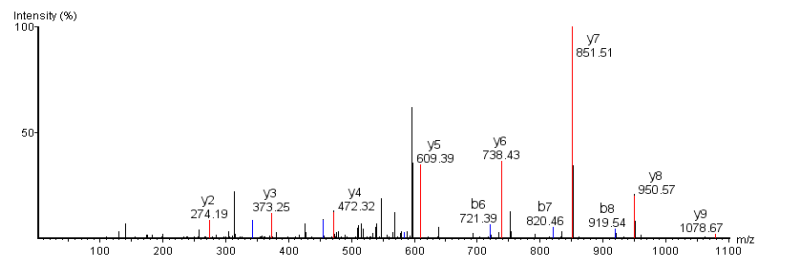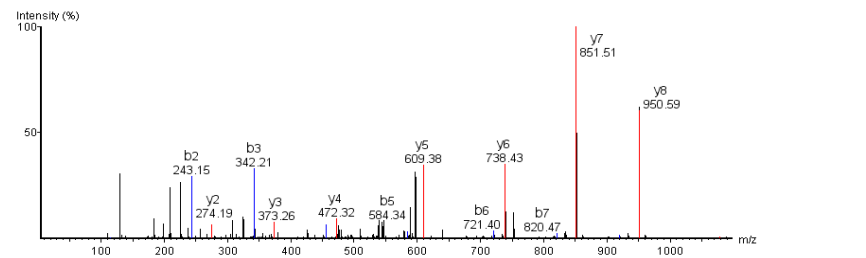

Eluted peptide

Synthetic peptide

YLMKLLTEA

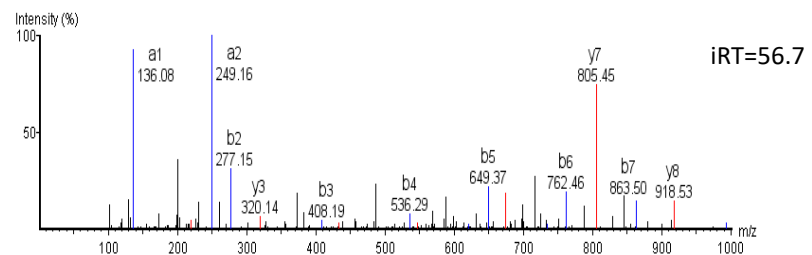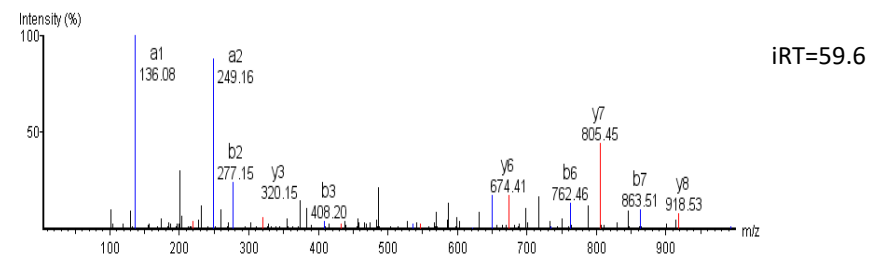

YLMKLLTEV

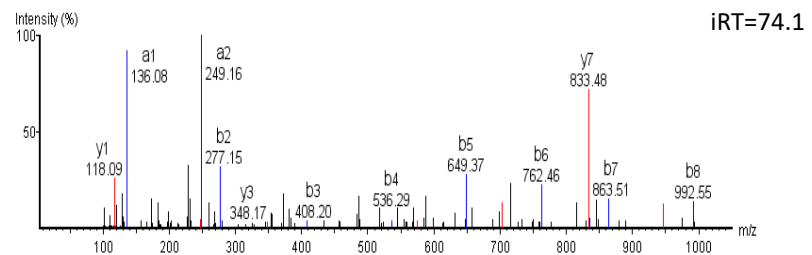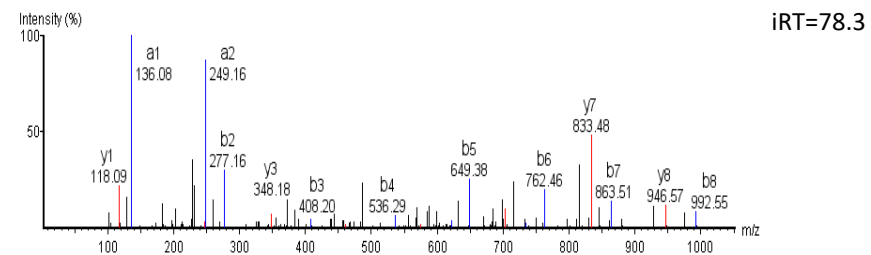

KGVLEHVVRV

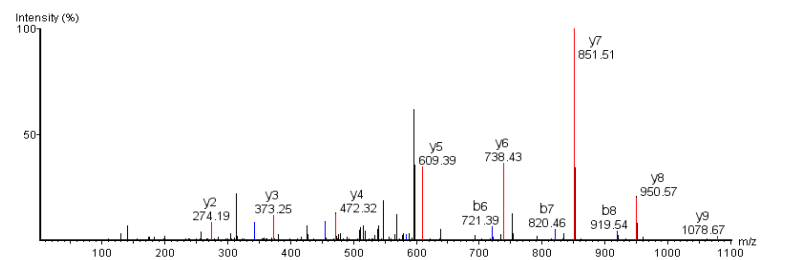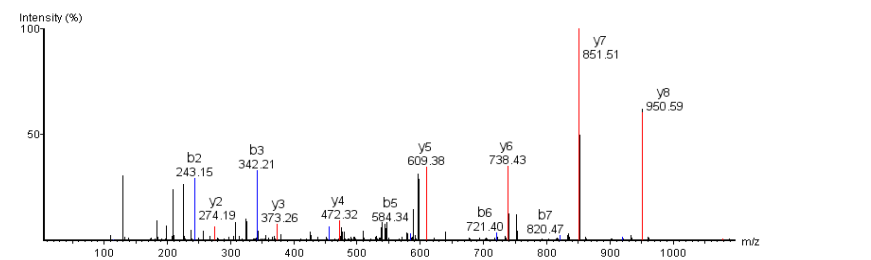

### Eluted peptide

LLALRLLSL

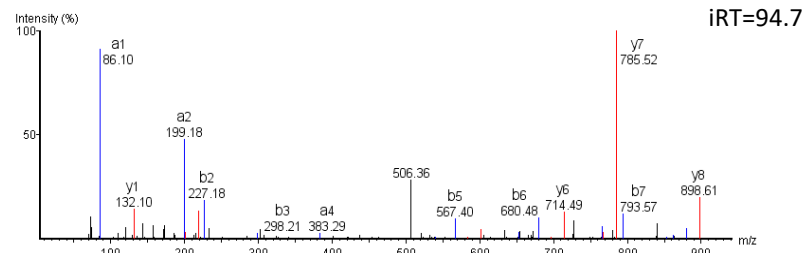

### Synthetic peptide

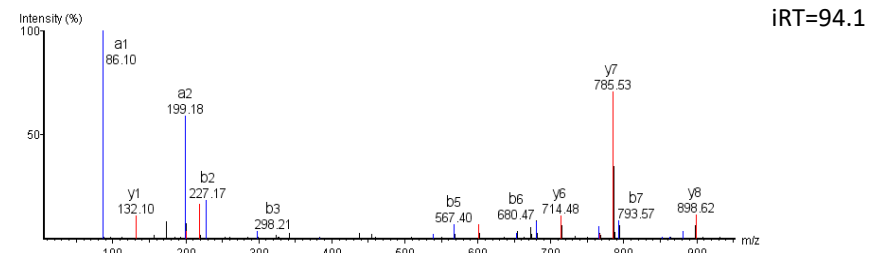

Fig.S9

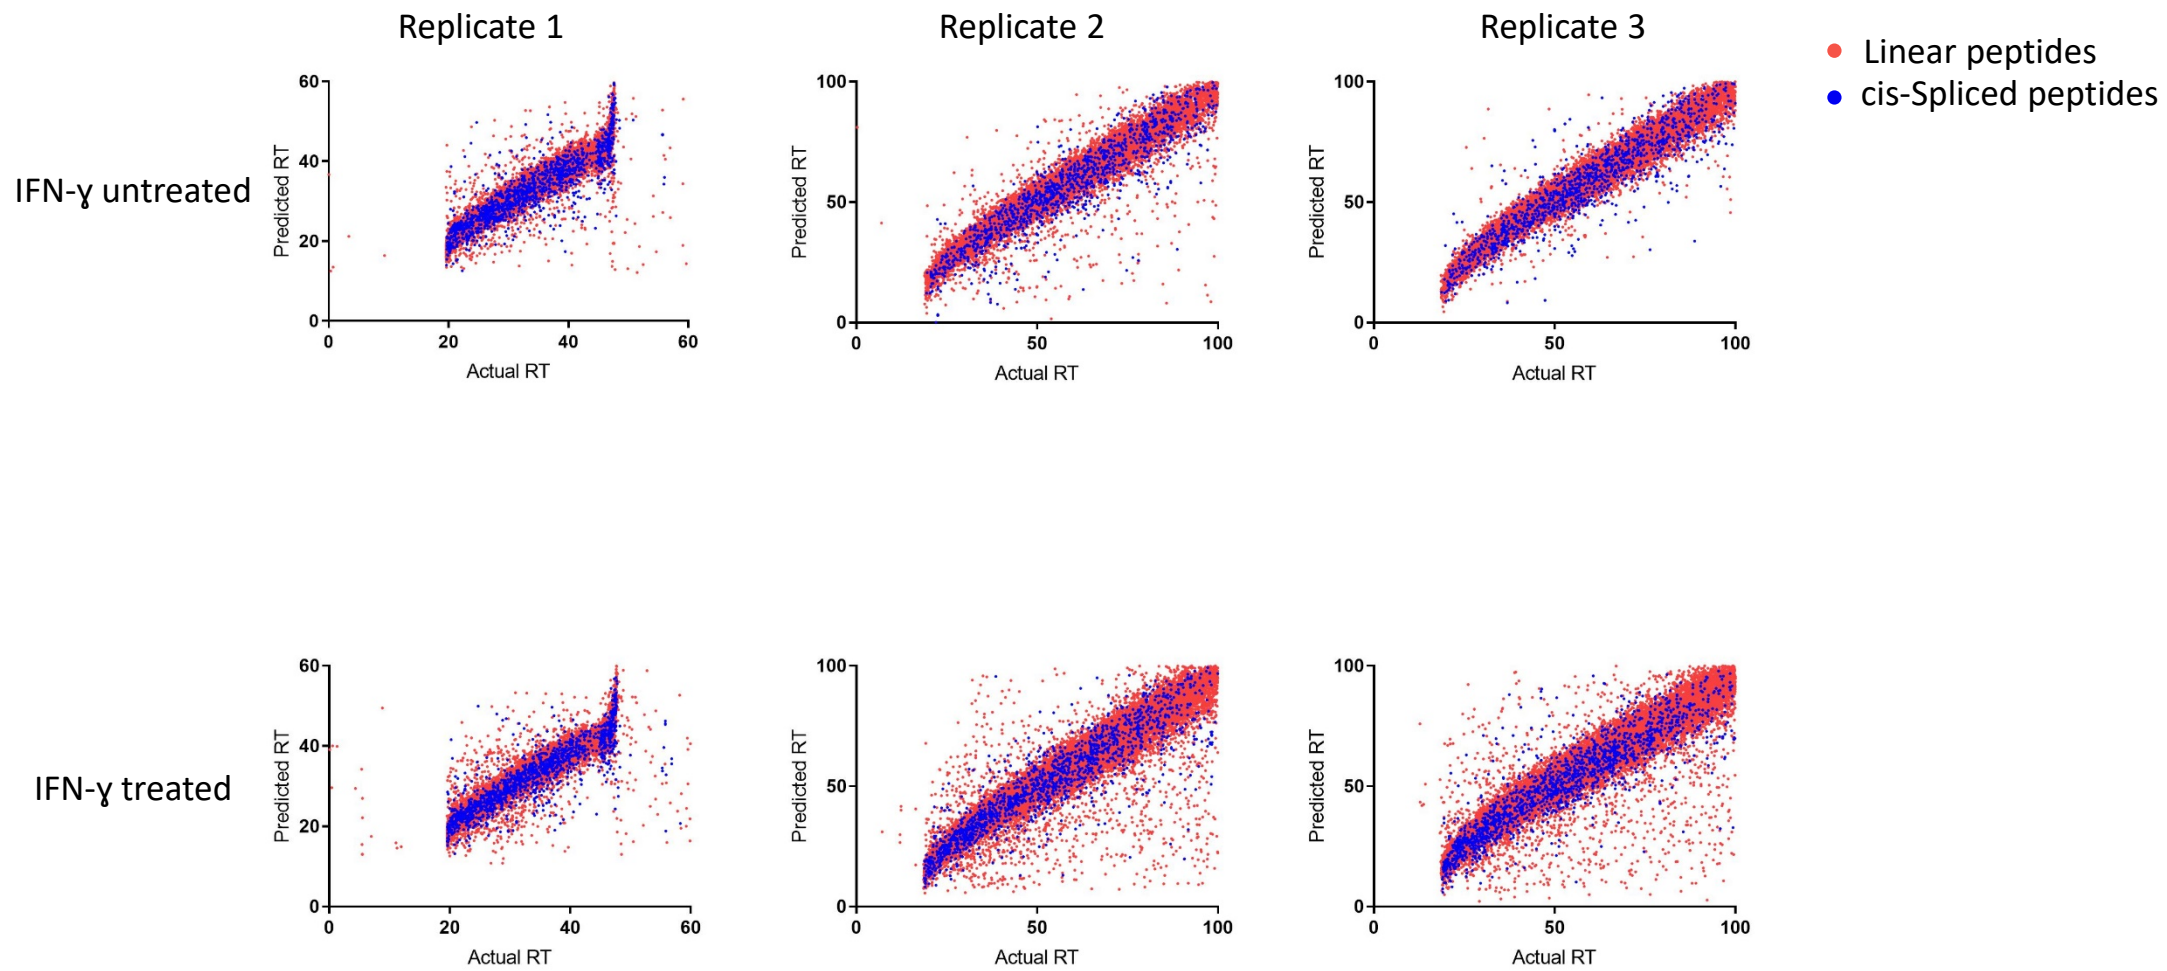

Source: https://www.biorxiv.org/content/10.1101/623223v2.full.pdf
