# Supplementary material for: Spliced peptides and cytokine driven changes in the immunopeptidome of melanoma
Source: bioRxiv preprint, doi:10.1101/623223, version 2 (2020-06-01)
Supplement: Table S4 [file 623223_file05.xlsx]

## Sheet: All peptides
Gene	UniProt ID	Seqeunce	Linear/cis-Spliced	Position	IFN-/+	Novel	Reported as immunugenic (https://caped.icp.ucl.ac.be/)
AARS1	P49588	IAEEKGLVV	Linear	(428=436)	Both conditions	FALSE	FALSE
AARS1	P49588	NTIDPSHPM	Linear	(55=63)	Both conditions	FALSE	FALSE
AARS1	P49588	KADVQKRVL	Linear	(834=842)	Both conditions	FALSE	FALSE
AARS1	P49588	YVFENTVATV	Linear	(497=506)	Both conditions	FALSE	FALSE
AARS1	P49588	TIDPSHPM	Linear	(56=63)	Both conditions	FALSE	FALSE
AARS1	P49588	QIYDEGYLVKV	Linear	(541=551)	Both conditions	TRUE	FALSE
AARS1	P49588	GEADQKGSL	Linear	(620=628)	Both conditions	FALSE	FALSE
AARS1	P49588	QEFGIPIERL	Linear	(124=133)	Both conditions	FALSE	FALSE
AARS1	P49588	REIADLGEAL	Linear	(793=802)	Both conditions	FALSE	FALSE
AARS1	P49588	FANAGMNQFKPI	Linear	(41=52)	IFN-ɣ treated	FALSE	FALSE
AARS1	P49588	FTVDNEAGKIT	Linear	(890=900)	IFN-ɣ treated	TRUE	FALSE
AARS1	P49588	NQFKPIFL	Linear	(47=54)	IFN-ɣ treated	FALSE	FALSE
AARS1	P49588	DIYAIEELRA	Linear	(466=475)	IFN-ɣ treated	TRUE	FALSE
AARS1	P49588	VEFCGGTHL	Linear	(720=728)	IFN-ɣ treated	TRUE	FALSE
AARS1	P49588	AQLRLGDVKN	Linear	(959=968)	IFN-ɣ treated	FALSE	FALSE
AARS1	P49588	SEDKTEFTV	Linear	(555=563)	Both conditions	TRUE	FALSE
AARS1	P49588	REKMFVEEV	Linear	(511=519)	IFN-ɣ treated	FALSE	FALSE
AARS1	P49588	KVMDDLDRA	Linear	(824=832)	IFN-ɣ treated	FALSE	FALSE
AARS1	P49588	LACKMALEL	Linear	(113=121)	IFN-ɣ treated	TRUE	FALSE
AARS1	P49588	YPDPVRVVS	Linear	(690=698)	IFN-ɣ treated	TRUE	FALSE
AARS1	P49588	FLNTIDPSHPM	Linear	(53=63)	IFN-ɣ treated	TRUE	FALSE
AARS1	P49588	SLGDAFPEL	Linear	(356=364)	IFN-ɣ treated	FALSE	FALSE
AARS1	P49588	IADLGEAL	Linear	(795=802)	IFN-ɣ treated	TRUE	FALSE
AARS1	P49588	KAEEIANEM	Linear	(651=659)	IFN-ɣ treated	TRUE	FALSE
AARS1	P49588	EADQKGSLV	Linear	(621=629)	IFN-ɣ treated	TRUE	FALSE
AARS1	P49588	FAQLRLGDV	Linear	(958=966)	IFN-ɣ treated	TRUE	FALSE
AARS1	P49588	QEFGIPIERLY	Linear	(124=134)	IFN-ɣ treated	FALSE	FALSE
AARS1	P49588	ILDRKIQSL	Linear	(392=400)	IFN-ɣ treated	FALSE	FALSE
AARS1	P49588	DIYAIEEL	Linear	(466=473)	IFN-ɣ treated	TRUE	FALSE
AARS1	P49588	LANEALKL	Cis-Spliced	(802=803;872=877)	IFN-ɣ treated	TRUE	FALSE
ACTB	P60709	RVAPEEHPVLL	Linear	(95=105)	Both conditions	FALSE	FALSE
ACTB	P60709	ALAPSTMKI	Linear	(319=327)	Both conditions	FALSE	FALSE
ACTB	P60709	ALPHAILRL	Linear	(170=178)	Both conditions	FALSE	FALSE
ACTB	P60709	RVAPEEHPV	Linear	(95=103)	Both conditions	FALSE	FALSE
ACTB	P60709	YALPHAILRL	Linear	(169=178)	Both conditions	FALSE	FALSE
ACTB	P60709	RVAPEEHPVLLT	Linear	(95=106)	Both conditions	FALSE	FALSE
ACTB	P60709	RMQKEITAL	Linear	(312=320)	Both conditions	FALSE	FALSE
ACTB	P60709	LTDYLMKIL	Linear	(185=193)	IFN-ɣ untreated	FALSE	FALSE
ACTB	P60709	YALPHAILR	Linear	(169=177)	IFN-ɣ untreated	FALSE	FALSE
ACTB	P60709	RVAPEEHPVL	Linear	(95=104)	Both conditions	FALSE	FALSE
ACTB	P60709	YASGRTTGIVMD	Linear	(143=154)	Both conditions	FALSE	FALSE
ACTB	P60709	VAIQAVLSL	Linear	(134=142)	Both conditions	FALSE	FALSE
ACTB	P60709	DLTDYLMK	Linear	(184=191)	Both conditions	FALSE	FALSE
ACTB	P60709	SVWIGGSILA	Linear	(338=347)	Both conditions	FALSE	FALSE
ACTB	P60709	IEHGIVTNW	Linear	(71=79)	Both conditions	FALSE	FALSE
ACTB	P60709	LRVAPEEHPVL	Linear	(94=104)	IFN-ɣ treated	FALSE	FALSE
ACTB	P60709	YASGRTTGIVM	Linear	(143=153)	IFN-ɣ treated	FALSE	FALSE
ACTB	P60709	VAPEEHPVL	Linear	(96=104)	IFN-ɣ treated	FALSE	FALSE
ACTB	P60709	YALPHAIL	Linear	(169=176)	IFN-ɣ treated	FALSE	FALSE
ACTB	P60709	VAPEEHPV	Linear	(96=103)	IFN-ɣ treated	FALSE	FALSE
ACTB	P60709	LVVDNGSGM	Linear	(8=16)	IFN-ɣ treated	FALSE	FALSE
ACTB	P60709	ALVVDNGS	Linear	(7=14)	IFN-ɣ treated	TRUE	FALSE
ACTB	P60709	RMQKEITALAP	Linear	(312=322)	IFN-ɣ treated	TRUE	FALSE
ACTB	P60709	DSYVGDEAQSK	Linear	(51=61)	IFN-ɣ treated	FALSE	FALSE
ACTB	P60709	EITALAPSTMK	Linear	(316=326)	IFN-ɣ treated	FALSE	FALSE
ACTB	P60709	GYSFTTTAER	Linear	(197=206)	IFN-ɣ treated	FALSE	FALSE
ACTB	P60709	AVAPEEHPV	Cis-Spliced	(138=139;97=103)	IFN-ɣ treated	TRUE	FALSE
ACTB	P60709	ERKLWHHTF	Cis-Spliced	(195=196;84=90)	IFN-ɣ treated	TRUE	FALSE
ACTB	P60709	TEAALPHALL	Cis-Spliced	(106=108;170=176)	Both conditions	TRUE	FALSE
ACTB	P60709	TEALPHALL	Cis-Spliced	(194=195;170=176)	Both conditions	TRUE	FALSE
ACTB	P60709	VGDHPVLL	Cis-Spliced	(54=56;101=105)	Both conditions	TRUE	FALSE
ACTB	P60709	YASGRVLSL	Cis-Spliced	(143=147;139=142)	Both conditions	TRUE	FALSE
ACTB	P60709	YLMKLLTEA	Cis-Spliced	(188=191;104=108)	Both conditions	TRUE	FALSE
ADAM17	P78536	NESEYTVKW	Linear	(103=111)	Both conditions	FALSE	FALSE
ADAM17	P78536	GEESTTTNYL	Linear	(242=251)	Both conditions	TRUE	FALSE
ADAM17	P78536	YLIELIDRV	Linear	(250=258)	Both conditions	FALSE	FALSE
ADAM17	P78536	LFHPSNVEM	Linear	(707=715)	Both conditions	FALSE	FALSE
ADAM17	P78536	QSLLFLTSV	Linear	(3=11)	Both conditions	TRUE	FALSE
ADAM17	P78536	SLSNIQQHSV	Linear	(46=55)	Both conditions	FALSE	FALSE
ADAM17	P78536	KEADLVTTHEL	Linear	(397=407)	IFN-ɣ treated	FALSE	FALSE
ADAM17	P78536	AEEASKVCL	Linear	(326=334)	IFN-ɣ treated	TRUE	FALSE
ADAM17	P78536	FHPSNVEM	Linear	(708=715)	IFN-ɣ treated	TRUE	FALSE
ADAM17	P78536	LLSDYDILSL	Linear	(38=47)	IFN-ɣ treated	TRUE	FALSE
ADAM17	P78536	KLDKQYESL	Linear	(697=705)	IFN-ɣ treated	TRUE	FALSE
ADAM17	P78536	APAAPKLDH	Linear	(748=756)	IFN-ɣ treated	TRUE	FALSE
ADAM17	P78536	LLTELVHRV	Cis-Spliced	(69=71;207=212)	IFN-ɣ untreated	TRUE	FALSE
ATIC	P31939	NLYPFVKTV	Linear	(102=110)	Both conditions	FALSE	FALSE
ATIC	P31939	RLDFNLIRV	Linear	(90=98)	Both conditions	FALSE	FALSE
ATIC	P31939	ALFEEVPEL	Linear	(510=518)	Both conditions	FALSE	FALSE
ATIC	P31939	VSDKTGLVEF	Linear	(11=20)	IFN-ɣ treated	FALSE	FALSE
ATIC	P31939	ALFEEVPELL	Linear	(510=519)	IFN-ɣ treated	FALSE	FALSE
ATIC	P31939	LGLGGLAVR	Cis-Spliced	(442=445;45=49)	Both conditions	TRUE	FALSE
ATIC	P31939	LGLNLVPFR	Cis-Spliced	(27=32;543=545)	Both conditions	TRUE	FALSE
ATIC	P31939	LLAPRVTVV	Cis-Spliced	(341=344;141=145)	Both conditions	TRUE	FALSE
BCAP31	P51572	AESASEAAKKY	Linear	(140=150)	Both conditions	FALSE	FALSE
BCAP31	P51572	KLDVGNAEV	Linear	(167=175)	Both conditions	FALSE	FALSE
BCAP31	P51572	LEKAENQVL	Linear	(202=210)	Both conditions	FALSE	FALSE
BCAP31	P51572	TLISQQATL	Linear	(121=129)	Both conditions	TRUE	FALSE
BCAP31	P51572	MEHFHMKLF	Linear	(89=97)	IFN-ɣ treated	FALSE	FALSE
BCAP31	P51572	FLLRRLVTL	Linear	(114=122)	IFN-ɣ treated	FALSE	FALSE
BCAP31	P51572	ESASEAAKKY	Linear	(141=150)	IFN-ɣ treated	FALSE	FALSE
BCAP31	P51572	SASEAAKKY	Linear	(142=150)	IFN-ɣ treated	FALSE	FALSE
BCL2L1	Q07817	NELFRDGVNW	Linear	(128=137)	Both conditions	FALSE	FALSE
BCL2L1	Q07817	REAGDEFEL	Linear	(91=99)	Both conditions	TRUE	FALSE
BCL2L1	Q07817	FSDLTSQL	Linear	(105=112)	Both conditions	FALSE	FALSE
BCL2L1	Q07817	SEMETPSAI	Linear	(43=51)	IFN-ɣ treated	TRUE	FALSE
BST2	Q10589	HLLQQELTEA	Linear	(68=77)	Both conditions	TRUE	FALSE
BST2	Q10589	EELEGEITTL	Linear	(114=123)	Both conditions	TRUE	FALSE
BST2	Q10589	LLQQELTEA	Linear	(69=77)	Both conditions	FALSE	FALSE
BST2	Q10589	KLQDASAEV	Linear	(126=134)	IFN-ɣ treated	FALSE	FALSE
BST2	Q10589	GEITTLNHKL	Linear	(118=127)	IFN-ɣ treated	FALSE	FALSE
BST2	Q10589	VEELEGEITTL	Linear	(113=123)	IFN-ɣ treated	TRUE	FALSE
BTBD2	Q9BX70	GLIRFPLMTI	Linear	(315=324)	Both conditions	FALSE	FALSE
BTBD2	Q9BX70	VMFKEPVEV	Linear	(451=459)	Both conditions	FALSE	FALSE
BTBD2	Q9BX70	RLFDEPQLASL	Linear	(230=240)	Both conditions	FALSE	FALSE
BTBD2	Q9BX70	RLFDEPQLA	Linear	(230=238)	Both conditions	FALSE	FALSE
BTBD2	Q9BX70	RADNAFMLL	Linear	(218=226)	Both conditions	TRUE	FALSE
BTBD2	Q9BX70	FLYSDEVQI	Linear	(177=185)	Both conditions	FALSE	FALSE
BTBD2	Q9BX70	FMLLTQARL	Linear	(223=231)	Both conditions	FALSE	FALSE
BTBD2	Q9BX70	EAECQRQQLQ	Linear	(291=300)	IFN-ɣ treated	TRUE	FALSE
BTBD2	Q9BX70	AEEAAGPGAAAL	Linear	(77=88)	IFN-ɣ treated	TRUE	FALSE
BTBD2	Q9BX70	AAAAPGARL	Cis-Spliced	(51=56;229=231)	IFN-ɣ treated	TRUE	FALSE
BTBD2	Q9BX70	AAAAPQRL	Cis-Spliced	(51=55;130=132)	Both conditions	TRUE	FALSE
C4B	P0C0L5	AEFQDALEKL	Linear	(317=326)	Both conditions	FALSE	FALSE
C4B	P0C0L5	YLDKNLTVSV	Linear	(858=867)	Both conditions	TRUE	FALSE
C4B	P0C0L5	EEQESRVHY	Linear	(1460=1468)	Both conditions	FALSE	FALSE
C4B	P0C0L5	RLFETKITQV	Linear	(1641=1650)	Both conditions	TRUE	FALSE
C4B	P0C0L5	HLAPSFYFV	Linear	(536=544)	Both conditions	TRUE	FALSE
C4B	P0C0L5	TEERGLNVTL	Linear	(1322=1331)	Both conditions	TRUE	FALSE
C4B	P0C0L5	REFHLHLRL	Linear	(831=839)	Both conditions	TRUE	FALSE
C4B	P0C0L5	VAHNNLMAM	Linear	(1212=1220)	Both conditions	TRUE	FALSE
C4B	P0C0L5	KEGAIHREEL	Linear	(935=944)	Both conditions	TRUE	FALSE
C4B	P0C0L5	FSHYYYMIL	Linear	(502=510)	Both conditions	TRUE	FALSE
C4B	P0C0L5	VMVENSHGL	Linear	(176=184)	Both conditions	FALSE	FALSE
C4B	P0C0L5	YEYDELPAKDDP	Linear	(1420=1431)	Both conditions	TRUE	FALSE
C4B	P0C0L5	YIYGKPVQGV	Linear	(270=279)	Both conditions	TRUE	FALSE
C4B	P0C0L5	SQSNAVSPT	Linear	(1236=1244)	IFN-ɣ untreated	TRUE	FALSE
C4B	P0C0L5	FETEGPHVL	Linear	(1515=1523)	Both conditions	TRUE	FALSE
C4B	P0C0L5	ALDTALYAA	Linear	(603=611)	Both conditions	FALSE	FALSE
C4B	P0C0L5	GNDETVALT	Linear	(1134=1142)	IFN-ɣ untreated	TRUE	FALSE
C4B	P0C0L5	FETKITQVL	Linear	(1643=1651)	IFN-ɣ treated	FALSE	FALSE
C4B	P0C0L5	GLLDEDGKKTFF	Linear	(285=296)	IFN-ɣ treated	TRUE	FALSE
C4B	P0C0L5	FETEGPHVLL	Linear	(1515=1524)	Both conditions	FALSE	FALSE
C4B	P0C0L5	TEGPHVLL	Linear	(1517=1524)	IFN-ɣ treated	TRUE	FALSE
C4B	P0C0L5	LLDEDGKKTFF	Linear	(286=296)	IFN-ɣ treated	TRUE	FALSE
C4B	P0C0L5	QEQVGGSPEKL	Linear	(1090=1100)	IFN-ɣ treated	TRUE	FALSE
C4B	P0C0L5	MADQAAAWL	Linear	(1281=1289)	IFN-ɣ treated	TRUE	FALSE
C4B	P0C0L5	REDSRAAFRL	Linear	(1633=1642)	IFN-ɣ treated	TRUE	FALSE
C4B	P0C0L5	VVHLGVPL	Linear	(30=37)	IFN-ɣ treated	TRUE	FALSE
C4B	P0C0L5	NMGKVFEA	Linear	(620=627)	IFN-ɣ treated	TRUE	FALSE
C4B	P0C0L5	FSDGDQWTL	Linear	(654=662)	IFN-ɣ treated	TRUE	FALSE
C4B	P0C0L5	VLYNYLDKNLTV	Linear	(854=865)	IFN-ɣ treated	TRUE	FALSE
C4B	P0C0L5	GLLDEDGKKTF	Linear	(285=295)	IFN-ɣ treated	TRUE	FALSE
C4B	P0C0L5	QETGDNLYW	Linear	(1222=1230)	IFN-ɣ treated	TRUE	FALSE
C4B	P0C0L5	QLQDVPRGQVV	Linear	(42=52)	IFN-ɣ treated	TRUE	FALSE
C4B	P0C0L5	IIESPGGEM	Linear	(344=352)	IFN-ɣ treated	TRUE	FALSE
C4B	P0C0L5	EEAELTSWYF	Linear	(353=362)	IFN-ɣ treated	TRUE	FALSE
C4B	P0C0L5	LLHEGKAEM	Linear	(1273=1281)	IFN-ɣ treated	TRUE	FALSE
C4B	P0C0L5	GLLGAHAAAITA	Linear	(1186=1197)	IFN-ɣ treated	TRUE	FALSE
C4B	P0C0L5	KLQETSNWLL	Linear	(1099=1108)	IFN-ɣ treated	TRUE	FALSE
C4B	P0C0L5	KLQETSNWL	Linear	(1099=1107)	IFN-ɣ treated	TRUE	FALSE
C4B	P0C0L5	LREDSRAAFR	Linear	(1632=1641)	IFN-ɣ treated	TRUE	FALSE
C4B	P0C0L5	ALTAFVTI	Linear	(1140=1147)	IFN-ɣ treated	TRUE	FALSE
C4B	P0C0L5	QLLRGPEVQL	Linear	(101=110)	IFN-ɣ treated	TRUE	FALSE
C4B	P0C0L5	LLDEDGKKTF	Linear	(286=295)	IFN-ɣ treated	TRUE	FALSE
C4B	P0C0L5	LETDSLALVAL	Linear	(591=601)	IFN-ɣ treated	TRUE	FALSE
C4B	P0C0L5	YLDKNLTV	Linear	(858=865)	IFN-ɣ treated	TRUE	FALSE
C4B	P0C0L5	KRTLTSVSV	Linear	(523=531)	IFN-ɣ treated	TRUE	FALSE
C4B	P0C0L5	ATYDLEGHPQYL	Linear	(1691=1702)	IFN-ɣ treated	TRUE	FALSE
C4B	P0C0L5	FQDALEKLNM	Linear	(319=328)	IFN-ɣ treated	TRUE	FALSE
C4B	P0C0L5	FLGEKALSV	Cis-Spliced	(1178=1183;573=575)	Both conditions	TRUE	FALSE
C4B	P0C0L5	KRDEDGKKTFF	Cis-Spliced	(375=376;288=296)	IFN-ɣ treated	TRUE	FALSE
C4B	P0C0L5	LSLELNEKL	Cis-Spliced	(473=476;687=691)	Both conditions	TRUE	FALSE
C4B	P0C0L5	LSLSALLHL	Cis-Spliced	(811=814;1268=1272)	IFN-ɣ treated	TRUE	FALSE
C4B	P0C0L5	QLLRGPVV	Cis-Spliced	(101=106;51=52)	IFN-ɣ treated	TRUE	FALSE
C4B	P0C0L5	VLALSLLRL	Cis-Spliced	(1306=1309;1002=1006)	IFN-ɣ untreated	TRUE	FALSE
C4B	P0C0L5	VLDELRPV	Cis-Spliced	(1386=1388;850=854)	Both conditions	TRUE	FALSE
C4B	P0C0L5	YLDKTLVR	Cis-Spliced	(1027=1031;389=391)	IFN-ɣ treated	TRUE	FALSE
CALCOCO1	Q9P1Z2	SEAEDEKSVL	Linear	(597=606)	Both conditions	FALSE	FALSE
CALCOCO1	Q9P1Z2	QEERTQNQVF	Linear	(441=450)	Both conditions	FALSE	FALSE
CALCOCO1	Q9P1Z2	KLLGQLKEV	Linear	(267=275)	Both conditions	TRUE	FALSE
CALCOCO1	Q9P1Z2	GEITEERDIL	Linear	(210=219)	Both conditions	FALSE	FALSE
CALCOCO1	Q9P1Z2	AELEPLKEQL	Linear	(336=345)	Both conditions	FALSE	FALSE
CALCOCO1	Q9P1Z2	REKDSSLVQL	Linear	(456=465)	IFN-ɣ treated	FALSE	FALSE
CALCOCO1	Q9P1Z2	AEDEKSVLM	Linear	(599=607)	IFN-ɣ treated	TRUE	FALSE
CALCOCO1	Q9P1Z2	GPATPTWKE	Linear	(647=655)	IFN-ɣ treated	TRUE	FALSE
CALCOCO1	Q9P1Z2	TLELLLPEL	Cis-Spliced	(129=131;619=624)	Both conditions	TRUE	FALSE
CCNB1	P14635	TLAKYLMEL	Linear	(321=329)	Both conditions	FALSE	FALSE
CCNB1	P14635	HLAKNVVMV	Linear	(382=390)	Both conditions	FALSE	FALSE
CCNB1	P14635	EEEQAVRPKY	Linear	(182=191)	Both conditions	FALSE	FALSE
CCNB1	P14635	TMLDYDMVHF	Linear	(330=339)	Both conditions	FALSE	FALSE
CCNB1	P14635	GEVDVEQHTL	Linear	(313=322)	Both conditions	FALSE	FALSE
CCNB1	P14635	EEQAVRPKY	Linear	(183=191)	Both conditions	FALSE	FALSE
CCNB1	P14635	AENKAKINM	Linear	(13=21)	Both conditions	FALSE	FALSE
CCNB1	P14635	RLLQETMYMTV	Linear	(217=227)	Both conditions	FALSE	FALSE
CCNB1	P14635	ALVQDLAKA	Linear	(421=429)	Both conditions	FALSE	FALSE
CCNB1	P14635	ILIDWLVQV	Linear	(204=212)	Both conditions	FALSE	FALSE
CCNB1	P14635	AEDGADPNL	Linear	(158=166)	Both conditions	FALSE	FALSE
CCNB1	P14635	YEEMYPPEI	Linear	(258=266)	IFN-ɣ untreated	FALSE	FALSE
CCNB1	P14635	QIAAGAFCL	Linear	(343=351)	IFN-ɣ treated	TRUE	FALSE
CCNB1	P14635	KFRLLQETMYM	Linear	(215=225)	IFN-ɣ treated	TRUE	FALSE
CCNB1	P14635	SKPGLRPR	Linear	(35=42)	IFN-ɣ treated	TRUE	FALSE
CCNB1	P14635	LAAGPRTAL	Cis-Spliced	(344=347;41=45)	IFN-ɣ treated	TRUE	FALSE
CCNB1	P14635	SLLDRFVGV	Cis-Spliced	(228=233;247=249)	Both conditions	TRUE	FALSE
CCT2	P78371	IEHADFAGVERL	Linear	(312=323)	Both conditions	FALSE	FALSE
CCT2	P78371	AESLIAKKI	Linear	(113=121)	Both conditions	FALSE	FALSE
CCT2	P78371	STFDHPELVKL	Linear	(333=343)	Both conditions	FALSE	FALSE
CCT2	P78371	VMIGEDKLIHF	Linear	(352=362)	Both conditions	TRUE	FALSE
CCT2	P78371	FLLDKKIGV	Linear	(218=226)	Both conditions	FALSE	FALSE
CCT2	P78371	ESLIAKKI	Linear	(114=121)	Both conditions	FALSE	FALSE
CCT2	P78371	LAVEAVLRL	Linear	(182=190)	Both conditions	FALSE	FALSE
CCT2	P78371	REGTIGDMAIL	Linear	(481=491)	IFN-ɣ untreated	FALSE	FALSE
CCT2	P78371	FAGVERLAL	Linear	(317=325)	Both conditions	TRUE	FALSE
CCT2	P78371	VALGEACTIV	Linear	(365=374)	Both conditions	TRUE	FALSE
CCT2	P78371	KGSGNLEAIHI	Linear	(191=201)	IFN-ɣ untreated	TRUE	FALSE
CCT2	P78371	AETARLTSF	Linear	(21=29)	IFN-ɣ treated	FALSE	FALSE
CCT2	P78371	MAHAVTQL	Linear	(417=424)	IFN-ɣ treated	FALSE	FALSE
CCT2	P78371	IGDLVKSTL	Linear	(35=43)	IFN-ɣ treated	FALSE	FALSE
CCT2	P78371	KMKEKVERI	Linear	(274=282)	IFN-ɣ treated	FALSE	FALSE
CCT2	P78371	LDMREGTI	Linear	(478=485)	IFN-ɣ treated	TRUE	FALSE
CCT2	P78371	LLDKKIGV	Linear	(219=226)	IFN-ɣ treated	FALSE	FALSE
CCT2	P78371	REATKAAREAL	Linear	(131=141)	IFN-ɣ treated	TRUE	FALSE
CCT2	P78371	AAEAAEVIL	Linear	(507=515)	Both conditions	TRUE	FALSE
CCT2	P78371	NYPEQLFGA	Linear	(298=306)	IFN-ɣ treated	TRUE	FALSE
CCT2	P78371	FDHPELVKL	Linear	(335=343)	IFN-ɣ treated	TRUE	FALSE
CCT2	P78371	MESYAKAL	Linear	(436=443)	IFN-ɣ treated	FALSE	FALSE
CCT2	P78371	LLDKKIGVN	Linear	(219=227)	IFN-ɣ treated	TRUE	FALSE
CCT2	P78371	IENAKILI	Linear	(232=239)	IFN-ɣ treated	TRUE	FALSE
CCT2	P78371	YLDEGFLL	Linear	(213=220)	IFN-ɣ treated	FALSE	FALSE
CCT2	P78371	HADLSSKL	Cis-Spliced	(314=316;167=171)	IFN-ɣ treated	TRUE	FALSE
CCT2	P78371	LLDKKLEKV	Cis-Spliced	(219=224;277=279)	Both conditions	TRUE	FALSE
CD101	Q93033	FLLLTKTHL	Cis-Spliced	(11=16;178=180)	Both conditions	TRUE	FALSE
CD101	Q93033	KLLEQLHLL	Cis-Spliced	(726=729;762=766)	IFN-ɣ untreated	TRUE	FALSE
CDC27	P30260	TLLGHEFVL	Linear	(605=613)	Both conditions	FALSE	FALSE
CDC27	P30260	FLAERLYAEV	Linear	(26=35)	Both conditions	FALSE	FALSE
CDC27	P30260	IVIDPKNPL	Linear	(696=704)	Both conditions	FALSE	FALSE
CDC27	P30260	MQAERIFSEV	Linear	(516=525)	Both conditions	FALSE	FALSE
CDC27	P30260	REHDIAIKFF	Linear	(581=590)	Both conditions	FALSE	FALSE
CDC27	P30260	KISTITPQI	Linear	(441=449)	Both conditions	FALSE	FALSE
CDC27	P30260	MTDADDTQL	Linear	(808=816)	Both conditions	TRUE	FALSE
CDC27	P30260	AEVHSEEALFL	Linear	(33=43)	Both conditions	FALSE	FALSE
CDC27	P30260	YAYRDAVFL	Linear	(19=27)	IFN-ɣ untreated	FALSE	FALSE
CDC27	P30260	REHDIAIKF	Linear	(581=589)	Both conditions	FALSE	FALSE
CDC27	P30260	AEVHSEEAL	Linear	(33=41)	Both conditions	FALSE	FALSE
CDC27	P30260	KAAAEGLMSLL	Linear	(456=466)	IFN-ɣ untreated	TRUE	FALSE
CDC27	P30260	REMGKGYLAL	Linear	(467=476)	IFN-ɣ treated	TRUE	FALSE
CDC27	P30260	KIPNRKTK	Linear	(403=410)	IFN-ɣ treated	TRUE	FALSE
CDC27	P30260	AEMHFQKAL	Linear	(654=662)	IFN-ɣ treated	FALSE	FALSE
CDC27	P30260	LGGPAAHSL	Cis-Spliced	(269=274;191=193)	Both conditions	TRUE	FALSE
CDC27	P30260	SGNDLSKL	Cis-Spliced	(336=338;81=85)	IFN-ɣ untreated	TRUE	FALSE
CDC27	P30260	SLLGHVLLR	Cis-Spliced	(119=124;465=467)	IFN-ɣ untreated	TRUE	FALSE
CDKN1A	P38936	SEQLSRDCDAL	Linear	(27=37)	Both conditions	TRUE	FALSE
CDKN1A	P38936	TAEEDHVDL	Linear	(105=113)	Both conditions	TRUE	FALSE
CDKN1A	P38936	AEEDHVDLSL	Linear	(106=115)	Both conditions	FALSE	FALSE
CDKN1A	P38936	RGLGLPKLYL	Linear	(69=78)	Both conditions	TRUE	FALSE
CDKN1A	P38936	EEDHVDLSL	Linear	(107=115)	Both conditions	FALSE	FALSE
CDKN1A	P38936	FAWERVRGL	Linear	(63=71)	IFN-ɣ untreated	TRUE	FALSE
CDKN1A	P38936	AEEDHVDL	Linear	(106=113)	IFN-ɣ treated	TRUE	FALSE
CDKN1A	P38936	ALMAGCIQEA	Linear	(36=45)	IFN-ɣ treated	FALSE	FALSE
CDKN1A	P38936	LMAGCIQEA	Linear	(37=45)	IFN-ɣ treated	FALSE	FALSE
CDKN1A	P38936	GLGLPKLYL	Linear	(70=78)	IFN-ɣ treated	TRUE	FALSE
CEP55	Q53EZ4	HEMEIQLKDAL	Linear	(168=178)	IFN-ɣ untreated	TRUE	FALSE
CEP55	Q53EZ4	REENDIARGKL	Linear	(308=318)	Both conditions	FALSE	FALSE
CEP55	Q53EZ4	SEEKDVLKQQL	Linear	(122=132)	Both conditions	FALSE	FALSE
CEP55	Q53EZ4	AELESKTNTL	Linear	(140=149)	Both conditions	FALSE	FALSE
CEP55	Q53EZ4	AATSRIAEL	Linear	(134=142)	Both conditions	FALSE	FALSE
CEP55	Q53EZ4	QEEQTRVALL	Linear	(343=352)	Both conditions	TRUE	FALSE
CEP55	Q53EZ4	QEEQTRVAL	Linear	(343=351)	Both conditions	FALSE	FALSE
CEP55	Q53EZ4	RLLEKIRVLEA	Linear	(58=68)	IFN-ɣ untreated	FALSE	FALSE
CEP55	Q53EZ4	ALNESLVEC	Linear	(432=440)	Both conditions	TRUE	FALSE
CEP55	Q53EZ4	LVYDQQREVYV	Linear	(185=195)	IFN-ɣ untreated	FALSE	FALSE
CEP55	Q53EZ4	GLLAKIFEL	Linear	(197=205)	Both conditions	FALSE	FALSE
CEP55	Q53EZ4	REVYVKGLL	Linear	(191=199)	IFN-ɣ treated	TRUE	FALSE
CEP55	Q53EZ4	MEIQLKDAL	Linear	(170=178)	IFN-ɣ treated	TRUE	FALSE
CEP55	Q53EZ4	KEIQRLRDQL	Linear	(82=91)	IFN-ɣ treated	TRUE	FALSE
CEP55	Q53EZ4	TVAPLLVHV	Cis-Spliced	(154=157;455=459)	Both conditions	TRUE	FALSE
CKAP5	Q14008	SEFGSKIILL	Linear	(153=162)	Both conditions	FALSE	FALSE
CKAP5	Q14008	VMQMKLHIV	Linear	(657=665)	Both conditions	TRUE	FALSE
CKAP5	Q14008	FLAEIFKKI	Linear	(1832=1840)	Both conditions	FALSE	FALSE
CKAP5	Q14008	VMDNKNPTI	Linear	(404=412)	IFN-ɣ untreated	TRUE	FALSE
CKAP5	Q14008	WLAEKLPTL	Linear	(1001=1009)	Both conditions	FALSE	FALSE
CKAP5	Q14008	VVSGVVSKV	Linear	(89=97)	Both conditions	FALSE	FALSE
CKAP5	Q14008	KELEEEWVKL	Linear	(212=221)	Both conditions	FALSE	FALSE
CKAP5	Q14008	LATASSPKF	Linear	(1697=1705)	Both conditions	FALSE	FALSE
CKAP5	Q14008	RLLPDTINSINL	Linear	(1718=1729)	Both conditions	FALSE	FALSE
CKAP5	Q14008	FLADVDKLKL	Linear	(478=487)	Both conditions	FALSE	FALSE
CKAP5	Q14008	WLAEKLPTLR	Linear	(1001=1010)	IFN-ɣ untreated	FALSE	FALSE
CKAP5	Q14008	HINDSAPEV	Linear	(447=455)	Both conditions	FALSE	FALSE
CKAP5	Q14008	VLMKALEYL	Linear	(1260=1268)	Both conditions	FALSE	FALSE
CKAP5	Q14008	FEDEKPALL	Linear	(794=802)	Both conditions	FALSE	FALSE
CKAP5	Q14008	YVGPSLRM	Linear	(785=792)	Both conditions	FALSE	FALSE
CKAP5	Q14008	EEFQKAVEL	Linear	(621=629)	Both conditions	FALSE	FALSE
CKAP5	Q14008	FLTTTLQNI	Linear	(389=397)	Both conditions	FALSE	FALSE
CKAP5	Q14008	AALVYVEN	Linear	(71=78)	IFN-ɣ untreated	TRUE	FALSE
CKAP5	Q14008	THMADEKL	Linear	(1598=1605)	IFN-ɣ untreated	TRUE	FALSE
CKAP5	Q14008	KALEYLKL	Linear	(1263=1270)	IFN-ɣ untreated	TRUE	FALSE
CKAP5	Q14008	KHINDSAPEV	Linear	(446=455)	IFN-ɣ untreated	TRUE	FALSE
CKAP5	Q14008	KLDDIFEPVL	Linear	(1509=1518)	Both conditions	FALSE	FALSE
CKAP5	Q14008	QEAIDAIFL	Linear	(382=390)	Both conditions	TRUE	FALSE
CKAP5	Q14008	LLSEEEYHL	Linear	(1274=1282)	Both conditions	FALSE	FALSE
CKAP5	Q14008	GEEVGPSVYL	Linear	(1927=1936)	IFN-ɣ untreated	FALSE	FALSE
CKAP5	Q14008	ALQEAIDAIFL	Linear	(380=390)	Both conditions	FALSE	FALSE
CKAP5	Q14008	KECSEKVEL	Linear	(491=499)	IFN-ɣ treated	TRUE	FALSE
CKAP5	Q14008	EEALKIFQKI	Linear	(29=38)	IFN-ɣ treated	FALSE	FALSE
CKAP5	Q14008	VTDSNAVVQLK	Linear	(57=67)	IFN-ɣ treated	TRUE	FALSE
CKAP5	Q14008	TLCKLKGPK	Linear	(1766=1774)	IFN-ɣ treated	TRUE	FALSE
CKAP5	Q14008	ALSEFGSKIILL	Linear	(151=162)	IFN-ɣ treated	FALSE	FALSE
CKAP5	Q14008	KILDHLTMI	Linear	(1774=1782)	IFN-ɣ treated	FALSE	FALSE
CKAP5	Q14008	ALVYVENAHV	Linear	(72=81)	IFN-ɣ treated	FALSE	FALSE
CKAP5	Q14008	SEFGSKIIL	Linear	(153=161)	IFN-ɣ treated	FALSE	FALSE
CKAP5	Q14008	LAEKLPTL	Linear	(1002=1009)	IFN-ɣ treated	FALSE	FALSE
CKAP5	Q14008	ISLFQIESLA	Linear	(1622=1631)	IFN-ɣ treated	TRUE	FALSE
CKAP5	Q14008	AKFIQPNI	Linear	(891=898)	IFN-ɣ treated	TRUE	FALSE
CKAP5	Q14008	VRNAALNTI	Linear	(1382=1390)	IFN-ɣ treated	TRUE	FALSE
CKAP5	Q14008	NVKAFISNV	Linear	(752=760)	IFN-ɣ treated	TRUE	FALSE
CKAP5	Q14008	IRKDVRAI	Linear	(1305=1312)	IFN-ɣ treated	TRUE	FALSE
CKAP5	Q14008	VASGDINTSI	Linear	(1549=1558)	IFN-ɣ treated	TRUE	FALSE
CKAP5	Q14008	KDVRAILNRMC	Linear	(1307=1317)	IFN-ɣ treated	TRUE	FALSE
CKAP5	Q14008	LIKNPKLE	Linear	(306=313)	IFN-ɣ treated	TRUE	FALSE
CKAP5	Q14008	LCKLKGPK	Linear	(1767=1774)	IFN-ɣ treated	TRUE	FALSE
CKAP5	Q14008	AGIINDAKFIQ	Linear	(885=895)	IFN-ɣ treated	TRUE	FALSE
CKAP5	Q14008	EAKLEQQQ	Linear	(239=246)	IFN-ɣ treated	TRUE	FALSE
CKAP5	Q14008	ALAATNPAV	Linear	(763=771)	Both conditions	FALSE	FALSE
CKAP5	Q14008	TEISDKITSEL	Linear	(855=865)	Both conditions	FALSE	FALSE
CKAP5	Q14008	AAATPGKAL	Cis-Spliced	(959=961;1363=1368)	IFN-ɣ treated	TRUE	FALSE
CKAP5	Q14008	AMLAEKLPTL	Cis-Spliced	(1071=1072;1002=1009)	Both conditions	TRUE	FALSE
CKAP5	Q14008	CVLAEKLPTL	Cis-Spliced	(1019=1020;1002=1009)	Both conditions	TRUE	FALSE
CKAP5	Q14008	FLLSKVELL	Cis-Spliced	(1544=1547;496=500)	IFN-ɣ treated	TRUE	FALSE
CKAP5	Q14008	KEWLELTL	Cis-Spliced	(975=979;776=778)	IFN-ɣ untreated	TRUE	FALSE
CKAP5	Q14008	LSALLAVRD	Cis-Spliced	(1685=1689;179=182)	Both conditions	TRUE	FALSE
CKAP5	Q14008	MALAEKLPTL	Cis-Spliced	(1054=1055;1002=1009)	Both conditions	TRUE	FALSE
CKAP5	Q14008	MSLAEKLPTL	Cis-Spliced	(1200=1201;1002=1009)	Both conditions	TRUE	FALSE
CPSF1	Q10570	YEAFPHDSQL	Linear	(874=883)	Both conditions	FALSE	FALSE
CPSF1	Q10570	QLYIHQMISV	Linear	(1209=1218)	IFN-ɣ untreated	FALSE	FALSE
CPSF1	Q10570	HVESKVYAV	Linear	(1028=1036)	IFN-ɣ untreated	TRUE	FALSE
CPSF1	Q10570	SAEGHVTMF	Linear	(660=668)	Both conditions	FALSE	FALSE
CPSF1	Q10570	EETVSGLKGY	Linear	(1111=1120)	Both conditions	FALSE	FALSE
CPSF1	Q10570	NITQKVHPV	Linear	(246=254)	Both conditions	TRUE	FALSE
CPSF1	Q10570	LLLKYTEKL	Linear	(392=400)	Both conditions	FALSE	FALSE
CPSF1	Q10570	TLITDGMRSV	Linear	(348=357)	Both conditions	FALSE	FALSE
CPSF1	Q10570	ALDEKLLNI	Linear	(195=203)	Both conditions	FALSE	FALSE
CPSF1	Q10570	SLAEEHEGL	Linear	(168=176)	Both conditions	FALSE	FALSE
CPSF1	Q10570	SEAQSGTQL	Linear	(450=458)	Both conditions	FALSE	FALSE
CPSF1	Q10570	VVPEPGQPL	Linear	(1147=1155)	IFN-ɣ untreated	FALSE	FALSE
CPSF1	Q10570	VADPYVVIMS	Linear	(651=660)	IFN-ɣ untreated	TRUE	FALSE
CPSF1	Q10570	FAVNSLLYL	Linear	(281=289)	Both conditions	FALSE	FALSE
CPSF1	Q10570	VADPYVVIM	Linear	(651=659)	Both conditions	FALSE	FALSE
CPSF1	Q10570	RLLEGVNQL	Linear	(627=635)	IFN-ɣ untreated	FALSE	FALSE
CPSF1	Q10570	QEESKTLSL	Linear	(1237=1245)	Both conditions	TRUE	FALSE
CPSF1	Q10570	GGEIYVLTLI	Linear	(341=350)	IFN-ɣ treated	TRUE	FALSE
CPSF1	Q10570	AVGEPAFLS	Linear	(479=487)	IFN-ɣ treated	TRUE	FALSE
CPSF1	Q10570	TLDGGIGLLLP	Linear	(1340=1350)	IFN-ɣ treated	TRUE	FALSE
CPSF1	Q10570	LLVNLTQKV	Cis-Spliced	(786=788;246=251)	Both conditions	TRUE	FALSE
CPSF1	Q10570	TVDDEEEET	Cis-Spliced	(739=744;1111=1113)	Both conditions	TRUE	FALSE
CSPG4	Q6UVK1	LSDGEHTSPGHF	Linear	(1560=1571)	Both conditions	TRUE	FALSE
CSPG4	Q6UVK1	RMVEEQLIRYV	Linear	(1423=1433)	Both conditions	TRUE	FALSE
CSPG4	Q6UVK1	TMLARLASA	Linear	(21=29)	Both conditions	FALSE	FALSE
CSPG4	Q6UVK1	HIIFPHGSL	Linear	(554=562)	Both conditions	TRUE	FALSE
CSPG4	Q6UVK1	QLYSGRLQV	Linear	(77=85)	Both conditions	FALSE	FALSE
CSPG4	Q6UVK1	VADGQPHEV	Linear	(279=287)	Both conditions	FALSE	FALSE
CSPG4	Q6UVK1	VSDGQHQATAL	Linear	(1107=1117)	Both conditions	TRUE	FALSE
CSPG4	Q6UVK1	GEAAEIRRDQL	Linear	(1252=1262)	Both conditions	TRUE	FALSE
CSPG4	Q6UVK1	ALKNGQYWV	Linear	(2314=2322)	Both conditions	FALSE	FALSE
CSPG4	Q6UVK1	MSDGASPPL	Linear	(1921=1929)	IFN-ɣ untreated	TRUE	FALSE
CSPG4	Q6UVK1	KGQGTVLL	Linear	(266=273)	IFN-ɣ untreated	TRUE	FALSE
CSPG4	Q6UVK1	TVVLTVVEGWAT	Linear	(111=122)	IFN-ɣ untreated	TRUE	FALSE
CSPG4	Q6UVK1	YLHSRPEAWS	Linear	(1320=1329)	IFN-ɣ untreated	TRUE	FALSE
CSPG4	Q6UVK1	ALTDIDLQL	Linear	(45=53)	Both conditions	FALSE	FALSE
CSPG4	Q6UVK1	TEPGGSQLVEQ	Linear	(2102=2112)	IFN-ɣ treated	FALSE	FALSE
CSPG4	Q6UVK1	TSDQLVLEVSV	Linear	(514=524)	IFN-ɣ treated	TRUE	FALSE
CSPG4	Q6UVK1	TLDLMEAEL	Linear	(455=463)	IFN-ɣ treated	TRUE	FALSE
CSPG4	Q6UVK1	SLDVASGLGAPL	Linear	(1333=1344)	IFN-ɣ treated	TRUE	FALSE
CSPG4	Q6UVK1	RLAWRGTQD	Linear	(944=952)	IFN-ɣ treated	TRUE	FALSE
CSPG4	Q6UVK1	DPELLALLL	Cis-Spliced	(2301=2303;2235=2240)	Both conditions	TRUE	FALSE
CSPG4	Q6UVK1	HLWSLLRPL	Cis-Spliced	(1706=1708;179=184)	Both conditions	TRUE	FALSE
CSPG4	Q6UVK1	LAAGYNAA	Cis-Spliced	(1779=1782;2165=2168)	IFN-ɣ untreated	TRUE	FALSE
CSPG4	Q6UVK1	LALTLTLHL	Cis-Spliced	(16=21;891=893)	IFN-ɣ untreated	TRUE	FALSE
CSPG4	Q6UVK1	LEATLLVLL	Cis-Spliced	(807=811;2231=2234)	Both conditions	TRUE	FALSE
CSPG4	Q6UVK1	LLDAAFPA	Cis-Spliced	(496=498;213=217)	Both conditions	TRUE	FALSE
CSPG4	Q6UVK1	LTAPYNAA	Cis-Spliced	(2260=2262;2164=2168)	Both conditions	TRUE	FALSE
CSPG4	Q6UVK1	QNTAGRVTY	Cis-Spliced	(795=797;854=859)	IFN-ɣ untreated	TRUE	FALSE
CSPG4	Q6UVK1	TDLDLLSRL	Cis-Spliced	(47=51;1023=1026)	Both conditions	TRUE	FALSE
CSPG4	Q6UVK1	TVLPTSRPL	Cis-Spliced	(1465=1468;162=166)	Both conditions	TRUE	FALSE
CSPG4	Q6UVK1	VLLERPAL	Cis-Spliced	(564=567;660=663)	IFN-ɣ treated	TRUE	FALSE
CT45A1	Q5HYN5	REINADIKRKL	Linear	(120=130)	Both conditions	FALSE	FALSE
CT45A1	Q5HYN5	KIFEMLEGV	Linear	(143=151)	Both conditions	TRUE	FALSE
CT45A1	Q5HYN5	KLVKELRCV	Linear	(129=137)	Both conditions	TRUE	FALSE
CT45A1	Q5HYN5	PSQLDSQI	Linear	(66=73)	IFN-ɣ treated	TRUE	FALSE
CT45A1	Q5HYN5	KLVKELRCMS	Cis-Spliced	(129=136;52=53)	Both conditions	TRUE	FALSE
CTAG1A	P78358	LAMPFATPM	Linear	(92=100)	Both conditions	FALSE	TRUE
CTAG1A	P78358	LAQPPSGQRR	Linear	(171=180)	Both conditions	TRUE	FALSE
CTAG1A	P78358	KEFTVSGNIL	Linear	(124=133)	Both conditions	TRUE	FALSE
CTAG1A	P78358	KEFTVSGNILT	Linear	(124=134)	IFN-ɣ treated	TRUE	TRUE
CTAG1A	P78358	AADHRQLQL	Linear	(139=147)	Both conditions	TRUE	FALSE
CTSL	P07711	VAIDAGHESFL	Linear	(247=257)	Both conditions	FALSE	FALSE
CTSL	P07711	VAIDAGHESF	Linear	(247=256)	Both conditions	TRUE	FALSE
CTSL	P07711	GIASAASYPTV	Linear	(323=333)	Both conditions	TRUE	FALSE
CTSL	P07711	RLISLSEQNLV	Linear	(157=167)	Both conditions	TRUE	FALSE
CTSL	P07711	KYSVANDTGFV	Linear	(216=226)	IFN-ɣ untreated	TRUE	FALSE
CTSL	P07711	AIDAGHESFL	Linear	(248=257)	Both conditions	TRUE	FALSE
CTSL	P07711	NEEGWRRAVW	Linear	(43=52)	IFN-ɣ treated	TRUE	FALSE
CTSL	P07711	GEEWGMGGYVKM	Linear	(303=314)	IFN-ɣ treated	TRUE	FALSE
CTSL	P07711	TESDNNKYWL	Linear	(288=297)	IFN-ɣ treated	FALSE	FALSE
CTSL	P07711	AIDAGHESFLF	Linear	(248=258)	IFN-ɣ treated	TRUE	FALSE
CTSL	P07711	GLMDYAFQYV	Linear	(181=190)	IFN-ɣ treated	TRUE	FALSE
CTSL	P07711	AIDAGHESF	Linear	(248=256)	IFN-ɣ treated	TRUE	FALSE
CTSL	P07711	GMGGYVKMA	Linear	(307=315)	IFN-ɣ treated	TRUE	FALSE
CTSL	P07711	VAIDAGHES	Linear	(247=255)	IFN-ɣ treated	TRUE	FALSE
DCT	P40126	EGLLRPTTL	Cis-Spliced	(304=308;470=473)	Both conditions	TRUE	FALSE
EEF2	P13639	TTFEHAHNMRV	Linear	(486=496)	Both conditions	FALSE	FALSE
EEF2	P13639	RETVSEESNVL	Linear	(580=590)	Both conditions	FALSE	FALSE
EEF2	P13639	YLAEKYEWDV	Linear	(634=643)	Both conditions	FALSE	FALSE
EEF2	P13639	FAEMYVAKF	Linear	(228=236)	Both conditions	FALSE	FALSE
EEF2	P13639	GEHIIAGAGEL	Linear	(542=552)	Both conditions	FALSE	FALSE
EEF2	P13639	ALCEENMRGV	Linear	(691=700)	Both conditions	FALSE	FALSE
EEF2	P13639	YLNEIKDSVV	Linear	(671=680)	Both conditions	FALSE	FALSE
EEF2	P13639	GLHGWAFTL	Linear	(217=225)	Both conditions	FALSE	FALSE
EEF2	P13639	TAISLFYEL	Linear	(73=81)	Both conditions	FALSE	FALSE
EEF2	P13639	YLNEIKDSV	Linear	(671=679)	Both conditions	FALSE	FALSE
EEF2	P13639	ILTDITKGV	Linear	(661=669)	Both conditions	FALSE	FALSE
EEF2	P13639	LIDSPGHVDF	Linear	(102=111)	Both conditions	FALSE	FALSE
EEF2	P13639	RLMEPIYLVEI	Linear	(739=749)	Both conditions	FALSE	FALSE
EEF2	P13639	IEESGEHII	Linear	(538=546)	Both conditions	FALSE	FALSE
EEF2	P13639	EENMRGVRF	Linear	(694=702)	Both conditions	FALSE	FALSE
EEF2	P13639	GLAEDIDKGEV	Linear	(612=622)	Both conditions	FALSE	FALSE
EEF2	P13639	LILDPIFKV	Linear	(292=300)	Both conditions	FALSE	FALSE
EEF2	P13639	IMIDPVLGTV	Linear	(203=212)	Both conditions	FALSE	FALSE
EEF2	P13639	GLKEGIPAL	Linear	(843=851)	Both conditions	FALSE	FALSE
EEF2	P13639	LEPEELYQTF	Linear	(169=178)	Both conditions	FALSE	FALSE
EEF2	P13639	KLIEKLDIKL	Linear	(314=323)	Both conditions	FALSE	FALSE
EEF2	P13639	RLMEPIYLV	Linear	(739=747)	Both conditions	FALSE	FALSE
EEF2	P13639	KMDRALLEL	Linear	(159=167)	Both conditions	FALSE	FALSE
EEF2	P13639	CVFDHWQI	Linear	(812=819)	IFN-ɣ untreated	TRUE	FALSE
EEF2	P13639	FAAKGEGQL	Linear	(236=244)	IFN-ɣ untreated	FALSE	FALSE
EEF2	P13639	KLWGDRYFD	Linear	(259=267)	IFN-ɣ untreated	TRUE	FALSE
EEF2	P13639	ARRCLYAS	Linear	(725=732)	IFN-ɣ untreated	TRUE	FALSE
EEF2	P13639	SDPMVQCII	Linear	(530=538)	IFN-ɣ untreated	TRUE	FALSE
EEF2	P13639	LTDITKGV	Linear	(662=669)	Both conditions	FALSE	FALSE
EEF2	P13639	HVDHGKSTL	Linear	(27=35)	Both conditions	FALSE	FALSE
EEF2	P13639	HVDFSSEV	Linear	(108=115)	IFN-ɣ untreated	TRUE	FALSE
EEF2	P13639	ALDNFLDKL	Linear	(850=858)	Both conditions	FALSE	FALSE
EEF2	P13639	YLNEIKDSVVA	Linear	(671=681)	Both conditions	FALSE	FALSE
EEF2	P13639	LELQLEPEEL	Linear	(165=174)	IFN-ɣ untreated	TRUE	FALSE
EEF2	P13639	FSSEVTAAL	Linear	(111=119)	Both conditions	FALSE	FALSE
EEF2	P13639	QVVGGIYGV	Linear	(754=762)	IFN-ɣ untreated	FALSE	FALSE
EEF2	P13639	GEVSARQEL	Linear	(620=628)	Both conditions	FALSE	FALSE
EEF2	P13639	VEDMMKKLW	Linear	(253=261)	IFN-ɣ treated	FALSE	FALSE
EEF2	P13639	KEETAKLIEKL	Linear	(309=319)	IFN-ɣ treated	TRUE	FALSE
EEF2	P13639	DEQERCITI	Linear	(62=70)	IFN-ɣ treated	FALSE	FALSE
EEF2	P13639	AEARKIWCF	Linear	(644=652)	IFN-ɣ treated	FALSE	FALSE
EEF2	P13639	GELHLEICL	Linear	(550=558)	IFN-ɣ treated	TRUE	FALSE
EEF2	P13639	VAVEAKNPA	Linear	(507=515)	IFN-ɣ treated	FALSE	FALSE
EEF2	P13639	SEESNVLCL	Linear	(584=592)	IFN-ɣ treated	FALSE	FALSE
EEF2	P13639	KLIEKLDIK	Linear	(314=322)	IFN-ɣ treated	FALSE	FALSE
EEF2	P13639	FTVDQIRAIM	Linear	(4=13)	IFN-ɣ treated	FALSE	FALSE
EEF2	P13639	YEWDVAEARKIW	Linear	(639=650)	IFN-ɣ treated	FALSE	FALSE
EEF2	P13639	AIAERIKPV	Linear	(146=154)	IFN-ɣ treated	TRUE	FALSE
EEF2	P13639	VTDGALVVV	Linear	(121=129)	IFN-ɣ treated	FALSE	FALSE
EEF2	P13639	LIEKLDIKL	Linear	(315=323)	IFN-ɣ treated	TRUE	FALSE
EEF2	P13639	VEIQCPEQV	Linear	(747=755)	IFN-ɣ treated	TRUE	FALSE
EEF2	P13639	PMGNIMIDPVL	Linear	(199=209)	IFN-ɣ treated	TRUE	FALSE
EEF2	P13639	GLHGWAFT	Linear	(217=224)	IFN-ɣ treated	TRUE	FALSE
EEF2	P13639	TIHLPSPVTA	Linear	(355=364)	IFN-ɣ treated	TRUE	FALSE
EEF2	P13639	IMIDPVLGTVGF	Linear	(203=214)	IFN-ɣ treated	FALSE	FALSE
EEF2	P13639	VVKAYLPV	Linear	(783=790)	IFN-ɣ treated	TRUE	FALSE
EEF2	P13639	GLVGVDQFLV	Linear	(471=480)	IFN-ɣ treated	FALSE	FALSE
EEF2	P13639	KGLKEGIPAL	Linear	(842=851)	Both conditions	TRUE	FALSE
EEF2	P13639	QAIAERIKPVL	Linear	(145=155)	IFN-ɣ treated	FALSE	FALSE
EEF2	P13639	FQRIVENVNV	Linear	(178=187)	IFN-ɣ treated	TRUE	FALSE
EEF2	P13639	ALLDPLFKV	Cis-Spliced	(303=304;294=300)	Both conditions	TRUE	FALSE
EEF2	P13639	ALLEKLDLKL	Cis-Spliced	(303=304;316=323)	IFN-ɣ treated	TRUE	FALSE
EEF2	P13639	ALTDLTKGV	Cis-Spliced	(691=692;663=669)	IFN-ɣ treated	TRUE	FALSE
EEF2	P13639	AVTDLTKGV	Cis-Spliced	(508=509;663=669)	Both conditions	TRUE	FALSE
EEF2	P13639	FLLDPLFKV	Cis-Spliced	(478=479;294=300)	IFN-ɣ untreated	TRUE	FALSE
EEF2	P13639	GLLEKLDLKL	Cis-Spliced	(384=385;316=323)	Both conditions	TRUE	FALSE
EEF2	P13639	KEEKLDLKL	Cis-Spliced	(309=310;317=323)	Both conditions	TRUE	FALSE
EEF2	P13639	KLLDPLFKV	Cis-Spliced	(284=285;294=300)	Both conditions	TRUE	FALSE
EEF2	P13639	KPLEKLDLKL	Cis-Spliced	(333=334;316=323)	IFN-ɣ treated	TRUE	FALSE
EEF2	P13639	KQEKLDLKL	Cis-Spliced	(226=227;317=323)	IFN-ɣ untreated	TRUE	FALSE
EEF2	P13639	LALEKLDLKL	Cis-Spliced	(147=148;316=323)	IFN-ɣ treated	TRUE	FALSE
EEF2	P13639	LATDLTKGV	Cis-Spliced	(635=636;663=669)	IFN-ɣ treated	TRUE	FALSE
EEF2	P13639	LFLDPLFKV	Cis-Spliced	(77=78;294=300)	IFN-ɣ untreated	TRUE	FALSE
EEF2	P13639	LTTDLTKGV	Cis-Spliced	(734=735;663=669)	IFN-ɣ treated	TRUE	FALSE
EEF2	P13639	LVTDLTKGV	Cis-Spliced	(746=747;663=669)	IFN-ɣ treated	TRUE	FALSE
EEF2	P13639	MVPDLTKGV	Cis-Spliced	(401=403;664=669)	IFN-ɣ treated	TRUE	FALSE
EEF2	P13639	NELKDSVTL	Cis-Spliced	(673=678;707=709)	Both conditions	TRUE	FALSE
EEF2	P13639	SLLDPLFKV	Cis-Spliced	(76=77;294=300)	Both conditions	TRUE	FALSE
EEF2	P13639	TLTDLTKGV	Cis-Spliced	(708=709;663=669)	IFN-ɣ treated	TRUE	FALSE
EEF2	P13639	TVLDPLFKV	Cis-Spliced	(211=212;294=300)	IFN-ɣ untreated	TRUE	FALSE
EEF2	P13639	TVTDLTKGV	Cis-Spliced	(582=583;663=669)	Both conditions	TRUE	FALSE
EEF2	P13639	VEDMMKKLAM	Cis-Spliced	(253=260;382=383)	Both conditions	TRUE	FALSE
EEF2	P13639	YLLDPLFKV	Cis-Spliced	(397=398;294=300)	Both conditions	TRUE	FALSE
EEF2	P13639	YLLEKLDLKL	Cis-Spliced	(397=398;316=323)	IFN-ɣ treated	TRUE	FALSE
EGFR	P00533	KEILDEAYVM	Linear	(757=766)	Both conditions	FALSE	FALSE
EGFR	P00533	YQDPHSTAV	Linear	(1125=1133)	Both conditions	FALSE	FALSE
EGFR	P00533	YYENSYAL	Linear	(112=119)	IFN-ɣ untreated	TRUE	FALSE
EGFR	P00533	AEGGKVPIKW	Linear	(871=880)	Both conditions	FALSE	FALSE
EGFR	P00533	QEILHGAVRF	Linear	(141=150)	Both conditions	FALSE	FALSE
EGFR	P00533	QLGTFEDHFL	Linear	(40=49)	IFN-ɣ treated	FALSE	FALSE
EGFR	P00533	NLQEILHGA	Linear	(139=147)	IFN-ɣ treated	TRUE	FALSE
EGFR	P00533	KEISDGDVII	Linear	(454=463)	IFN-ɣ treated	TRUE	FALSE
EGFR	P00533	GGKVPIKW	Linear	(873=880)	IFN-ɣ treated	FALSE	FALSE
EGFR	P00533	KIKVLGSGA	Linear	(714=722)	IFN-ɣ treated	TRUE	FALSE
EGFR	P00533	CAAGCTGPR	Linear	(236=244)	IFN-ɣ treated	TRUE	FALSE
EGFR	P00533	ALAVLSNYDA	Linear	(118=127)	IFN-ɣ treated	FALSE	FALSE
EGFR	P00533	ISGNKNLCYA	Linear	(463=472)	IFN-ɣ treated	TRUE	FALSE
EGFR	P00533	LSLDKLLGA	Cis-Spliced	(1165=1168;860=864)	IFN-ɣ untreated	TRUE	FALSE
EGFR	P00533	LSLNKLLGA	Cis-Spliced	(349=352;860=864)	IFN-ɣ untreated	TRUE	FALSE
EGFR	P00533	TEDQDPHSTAV	Cis-Spliced	(1078=1080;1126=1133)	Both conditions	TRUE	FALSE
EHD2	Q9NZN4	IEAKLEGHGL	Linear	(513=522)	Both conditions	FALSE	FALSE
EHD2	Q9NZN4	FGAFHSPAL	Linear	(42=50)	Both conditions	FALSE	FALSE
EHD2	Q9NZN4	HEDKIRVVL	Linear	(210=218)	Both conditions	FALSE	FALSE
EHD2	Q9NZN4	KADMVETQQLM	Linear	(220=230)	Both conditions	TRUE	FALSE
EHD2	Q9NZN4	ALMWALGKV	Linear	(235=243)	IFN-ɣ untreated	TRUE	FALSE
EHD2	Q9NZN4	SVLGRIWKL	Linear	(484=492)	Both conditions	FALSE	FALSE
EHD2	Q9NZN4	QELLMAHDF	Linear	(360=368)	Both conditions	FALSE	FALSE
EHD2	Q9NZN4	ALASHLIEA	Linear	(507=515)	Both conditions	FALSE	FALSE
EHD2	Q9NZN4	HAYIISYL	Linear	(307=314)	Both conditions	TRUE	FALSE
EHD2	Q9NZN4	AQLPNQVL	Linear	(139=146)	Both conditions	FALSE	FALSE
EHD2	Q9NZN4	VLGRIWKL	Linear	(485=492)	Both conditions	TRUE	FALSE
EHD2	Q9NZN4	IIDTPGIL	Linear	(151=158)	Both conditions	FALSE	FALSE
EHD2	Q9NZN4	AERVDLIIL	Linear	(179=187)	Both conditions	TRUE	FALSE
EHD2	Q9NZN4	KLNDLVKRA	Linear	(293=301)	IFN-ɣ untreated	TRUE	FALSE
EHD2	Q9NZN4	IGSFWSQP	Linear	(254=261)	IFN-ɣ untreated	TRUE	FALSE
EHD2	Q9NZN4	MLDDEEFALA	Linear	(500=509)	Both conditions	TRUE	FALSE
EHD2	Q9NZN4	MLDDEEFAL	Linear	(500=508)	Both conditions	TRUE	FALSE
EHD2	Q9NZN4	LASHLIEA	Linear	(508=515)	Both conditions	TRUE	FALSE
EHD2	Q9NZN4	ALASHLIE	Linear	(507=514)	IFN-ɣ treated	TRUE	FALSE
EHD2	Q9NZN4	EAKLEGHGL	Linear	(514=522)	IFN-ɣ treated	TRUE	FALSE
EHD2	Q9NZN4	QLILKLPVI	Linear	(330=338)	Both conditions	TRUE	FALSE
EHD2	Q9NZN4	EDKIRVVL	Linear	(211=218)	IFN-ɣ treated	TRUE	FALSE
EHD2	Q9NZN4	ALASKTWMV	Cis-Spliced	(507=510;473=477)	IFN-ɣ untreated	TRUE	FALSE
EHD2	Q9NZN4	LAASHLLEA	Cis-Spliced	(460=461;509=515)	Both conditions	TRUE	FALSE
EIF2S2	P20042	KIFDIDEAEEGV	Linear	(87=98)	Both conditions	FALSE	FALSE
EIF2S2	P20042	FQQKQIENV	Linear	(262=270)	Both conditions	FALSE	FALSE
EIF2S2	P20042	YTYEELLNRV	Linear	(174=183)	Both conditions	FALSE	FALSE
EIF2S2	P20042	FNQKKKKKKTKK	Linear	(76=87)	IFN-ɣ treated	TRUE	FALSE
EIF2S2	P20042	AEEGVKDLKI	Linear	(94=103)	IFN-ɣ treated	TRUE	FALSE
ERBB2	P04626	VLIQRNPQL	Linear	(153=161)	Both conditions	FALSE	FALSE
ERBB2	P04626	ILHNGAYSL	Linear	(435=443)	Both conditions	FALSE	TRUE
ERBB2	P04626	QLFEDNYAL	Linear	(106=114)	Both conditions	FALSE	FALSE
ERBB2	P04626	RLLDIDETEYHA	Linear	(868=879)	Both conditions	FALSE	FALSE
ERBB2	P04626	YLGLDVPV	Linear	(1248=1255)	IFN-ɣ treated	TRUE	FALSE
ERBB2	P04626	LSVFQNLQV	Linear	(422=430)	IFN-ɣ treated	TRUE	FALSE
ERBB2	P04626	ALASLTRTV	Cis-Spliced	(113=115;214=219)	IFN-ɣ treated	TRUE	FALSE
ERBB2	P04626	LVDENVKL	Cis-Spliced	(1017=1019;744=748)	Both conditions	TRUE	FALSE
ESYT2	H7BXI1	ALLEDEERVVRL	Linear	(89=100)	Both conditions	FALSE	FALSE
ESYT2	H7BXI1	EELAKGWTQW	Linear	(843=852)	Both conditions	FALSE	FALSE
ESYT2	H7BXI1	SEDGSDPYVRMY	Linear	(762=773)	Both conditions	FALSE	FALSE
ESYT2	H7BXI1	ISSNPNPV	Linear	(499=506)	IFN-ɣ untreated	TRUE	FALSE
ESYT2	H7BXI1	SLMIDLIEV	Linear	(395=403)	IFN-ɣ untreated	FALSE	FALSE
ESYT2	H7BXI1	SLLASPGHISV	Linear	(684=694)	IFN-ɣ untreated	TRUE	FALSE
ESYT2	H7BXI1	RLLDEWFTL	Linear	(407=415)	Both conditions	TRUE	FALSE
ESYT2	H7BXI1	AQDLQGKDTYL	Linear	(318=328)	IFN-ɣ treated	TRUE	FALSE
ESYT2	H7BXI1	LEDEERVVRL	Linear	(91=100)	Both conditions	TRUE	FALSE
ESYT2	H7BXI1	LALLEDEERVVR	Linear	(88=99)	Both conditions	TRUE	FALSE
ESYT2	H7BXI1	EDEERVVRL	Linear	(92=100)	IFN-ɣ treated	FALSE	FALSE
ESYT2	H7BXI1	LLGKVLVA	Linear	(832=839)	IFN-ɣ treated	TRUE	FALSE
ESYT2	H7BXI1	SLGNLKVPL	Linear	(557=565)	IFN-ɣ treated	TRUE	FALSE
ESYT2	H7BXI1	MKIALRVLHLEK	Linear	(593=604)	IFN-ɣ treated	TRUE	FALSE
ESYT2	H7BXI1	LGNLKVPLS	Linear	(558=566)	IFN-ɣ treated	TRUE	FALSE
ESYT2	H7BXI1	KRPSVALK	Cis-Spliced	(618=622;492=494)	IFN-ɣ untreated	TRUE	FALSE
ESYT2	H7BXI1	LGLSGLLRV	Cis-Spliced	(56=59;340=344)	IFN-ɣ untreated	TRUE	FALSE
ESYT2	H7BXI1	LLAQLRVLL	Cis-Spliced	(36=40;225=228)	IFN-ɣ treated	TRUE	FALSE
ESYT2	H7BXI1	LSLPLRVLL	Cis-Spliced	(705=709;225=228)	Both conditions	TRUE	FALSE
FAM171B	Q6P995	VLLKARLVPA	Linear	(19=28)	Both conditions	FALSE	FALSE
FAM171B	Q6P995	PKILYLEDL	Linear	(733=741)	IFN-ɣ untreated	TRUE	FALSE
FAM171B	Q6P995	LKARLVPA	Linear	(21=28)	IFN-ɣ untreated	FALSE	FALSE
FAM171B	Q6P995	LLKARLVPA	Linear	(20=28)	IFN-ɣ untreated	FALSE	FALSE
FAM171B	Q6P995	ISEQTLLEL	Linear	(653=661)	Both conditions	FALSE	FALSE
FBH1	Q8NFZ0	FTVPHTHVF	Linear	(688=697)	Both conditions	FALSE	FALSE
FBH1	Q8NFZ0	ILGTVHKA	Linear	(868=876)	Both conditions	TRUE	FALSE
FBH1	Q8NFZ0	RIIDIWILL	Linear	(783=792)	IFN-ɣ untreated	FALSE	FALSE
FBH1	Q8NFZ0	YILGTVHKA	Linear	(867=876)	Both conditions	TRUE	FALSE
FBH1	Q8NFZ0	VLDDFVKV	Linear	(885=893)	IFN-ɣ treated	FALSE	FALSE
FBH1	Q8NFZ0	GEFPSRIHL	Linear	(764=773)	IFN-ɣ treated	FALSE	FALSE
FBH1	Q8NFZ0	KSLENILTL	Linear	(933=942)	IFN-ɣ treated	FALSE	FALSE
FBH1	Q8NFZ0	VMVEQSEKL	Linear	(588=597)	IFN-ɣ treated	FALSE	FALSE
FBXO32	Q969P5	KVLEDQQNIRL	Linear	(155=165)	Both conditions	FALSE	FALSE
FBXO32	Q969P5	FLDEKSGSFV	Linear	(25=34)	Both conditions	FALSE	FALSE
FBXO32	Q969P5	FLDEKSGSF	Linear	(25=33)	Both conditions	FALSE	FALSE
FBXO32	Q969P5	LEDQQNIRL	Linear	(157=165)	Both conditions	FALSE	FALSE
FBXO32	Q969P5	RELLQTLYTSL	Linear	(167=177)	Both conditions	FALSE	FALSE
FBXO32	Q969P5	SLCTLVQRV	Linear	(176=184)	Both conditions	TRUE	FALSE
FBXO32	Q969P5	KEVYNKENL	Linear	(43=51)	Both conditions	FALSE	FALSE
FBXO32	Q969P5	ILDSRRFNYV	Linear	(113=122)	Both conditions	TRUE	FALSE
FBXO32	Q969P5	FLDEKSGSFVS	Linear	(25=35)	IFN-ɣ treated	TRUE	FALSE
FBXO32	Q969P5	KERHGYCTL	Linear	(92=100)	IFN-ɣ treated	TRUE	FALSE
FBXO32	Q969P5	TILHWQQQL	Linear	(202=210)	IFN-ɣ treated	TRUE	FALSE
FBXO32	Q969P5	LELIAKSQL	Linear	(126=134)	IFN-ɣ treated	TRUE	FALSE
FBXO32	Q969P5	LLNLLEKV	Cis-Spliced	(165=166;147=152)	IFN-ɣ treated	TRUE	FALSE
HLA-A	P04439	GSHSMRYFFTS	Linear	(25=35)	Both conditions	FALSE	FALSE
HLA-A	P04439	GSHSMRYFFT	Linear	(25=34)	Both conditions	FALSE	FALSE
HLA-A	P04439	SDHEATLRCW	Linear	(219=228)	Both conditions	FALSE	FALSE
HLA-A	P04439	GSHSMRYF	Linear	(25=32)	Both conditions	FALSE	FALSE
HLA-A	P04439	YVDDTQFVRF	Linear	(51=60)	Both conditions	FALSE	FALSE
HLA-A	P04439	GSHSMRYFF	Linear	(25=33)	Both conditions	FALSE	FALSE
HLA-A	P04439	ALGFYPAEITL	Linear	(229=239)	Both conditions	FALSE	FALSE
HLA-A	P04439	VMAPRTLLL	Linear	(3=11)	Both conditions	FALSE	FALSE
HLA-A	P04439	IEQEGPEYW	Linear	(76=84)	Both conditions	FALSE	FALSE
HLA-A	P04439	HSMRYFFT	Linear	(27=34)	IFN-ɣ untreated	TRUE	FALSE
HLA-A	P04439	YLENGKETL	Linear	(195=203)	Both conditions	FALSE	FALSE
HLA-A	P04439	GEDQTQDTEL	Linear	(245=254)	Both conditions	FALSE	FALSE
HLA-A	P04439	ISDHEATL	Linear	(218=225)	Both conditions	FALSE	FALSE
HLA-A	P04439	HEATLRCWAL	Linear	(221=230)	Both conditions	FALSE	FALSE
HLA-A	P04439	WAGSHSMRYFFT	Linear	(23=34)	IFN-ɣ untreated	TRUE	FALSE
HLA-A	P04439	VSLTACKV	Linear	(358=365)	Both conditions	FALSE	FALSE
HLA-A	P04439	YVDDTQFV	Linear	(51=58)	Both conditions	FALSE	FALSE
HLA-A	P04439	VMAPRTLLLL	Linear	(3=12)	Both conditions	TRUE	FALSE
HLA-A	P04439	DGKDYIAL	Linear	(143=150)	Both conditions	FALSE	FALSE
HLA-A	P04439	SEAGSHTI	Linear	(112=119)	Both conditions	FALSE	FALSE
HLA-A	P04439	QSEAGSHTI	Linear	(111=119)	Both conditions	FALSE	FALSE
HLA-A	P04439	TWQRDGEDQTQD	Linear	(240=251)	Both conditions	FALSE	FALSE
HLA-A	P04439	TSVSRPGR	Linear	(34=41)	Both conditions	FALSE	FALSE
HLA-A	P04439	SAQGSDVSLTA	Linear	(352=362)	Both conditions	FALSE	FALSE
HLA-A	P04439	RYFFTSVSRPGR	Linear	(30=41)	Both conditions	FALSE	FALSE
HLA-A	P04439	FVRFDSDAASQR	Linear	(57=68)	IFN-ɣ treated	FALSE	FALSE
HLA-A	P04439	YVDDTQFVR	Linear	(51=59)	IFN-ɣ treated	FALSE	FALSE
HLA-A	P04439	WAGSHSMRYF	Linear	(23=32)	IFN-ɣ treated	FALSE	FALSE
HLA-A	P04439	SDHEATLR	Linear	(219=226)	IFN-ɣ treated	FALSE	FALSE
HLA-A	P04439	VMAPRTLL	Linear	(3=10)	IFN-ɣ treated	FALSE	FALSE
HLA-A	P04439	MAVMAPRTL	Linear	(1=9)	IFN-ɣ treated	TRUE	FALSE
HLA-A	P04439	TRPAGDGTFQ	Linear	(257=266)	IFN-ɣ treated	FALSE	FALSE
HLA-A	P04439	GEPRFIAVGYVD	Linear	(42=53)	IFN-ɣ treated	TRUE	FALSE
HLA-A	P04439	FTSVSRPGR	Linear	(33=41)	IFN-ɣ treated	FALSE	FALSE
HLA-A	P04439	SAQGSDVSL	Linear	(352=360)	IFN-ɣ treated	FALSE	FALSE
HLA-A	P04439	AYDGKDYIAL	Linear	(141=150)	IFN-ɣ treated	FALSE	FALSE
HLA-A	P04439	VMAPRTLLLLL	Linear	(3=13)	IFN-ɣ treated	TRUE	FALSE
HLA-A	P04439	MAPRTLLL	Linear	(4=11)	IFN-ɣ treated	FALSE	FALSE
HLA-A	P04439	DDTQFVRF	Linear	(53=60)	IFN-ɣ treated	FALSE	FALSE
HLA-A	P04439	TELVETRPAGD	Linear	(252=262)	IFN-ɣ treated	FALSE	FALSE
HLA-A	P04439	YDGKDYIAL	Linear	(142=150)	IFN-ɣ treated	FALSE	FALSE
HLA-A	P04439	AGDGTFQKW	Linear	(260=268)	IFN-ɣ treated	FALSE	FALSE
HLA-A	P04439	FFTSVSRPGR	Linear	(32=41)	IFN-ɣ treated	FALSE	FALSE
HLA-A	P04439	YFFTSVSRPGR	Linear	(31=41)	IFN-ɣ treated	FALSE	FALSE
HLA-A	P04439	GEPRFIAVG	Linear	(42=50)	IFN-ɣ treated	TRUE	FALSE
HLA-A	P04439	AAYDGKDYLAL	Cis-Spliced	(159=160;142=150)	Both conditions	TRUE	FALSE
HLA-A	P04439	ALNEDLRAYL	Cis-Spliced	(149=153;180=184)	Both conditions	TRUE	FALSE
HLA-A	P04439	TELVETQKW	Cis-Spliced	(252=257;266=268)	Both conditions	TRUE	FALSE
HMMR	O75330	KLQEELNKV	Linear	(671=679)	Both conditions	FALSE	FALSE
HMMR	O75330	AEDVQHQIL	Linear	(491=499)	Both conditions	FALSE	FALSE
HMMR	O75330	AELTEEINKW	Linear	(570=579)	IFN-ɣ untreated	FALSE	FALSE
HMMR	O75330	EELKLLEEKL	Linear	(411=420)	Both conditions	TRUE	FALSE
HMMR	O75330	KLLEYIEEI	Linear	(232=240)	Both conditions	FALSE	FALSE
HMMR	O75330	KILEKEIRV	Linear	(85=93)	Both conditions	FALSE	FALSE
HMMR	O75330	KQEGMEMKL	Linear	(187=195)	Both conditions	TRUE	FALSE
HMMR	O75330	AEMQNLKQKF	Linear	(316=325)	IFN-ɣ treated	FALSE	FALSE
HMMR	O75330	TEIKEITVSFL	Linear	(524=534)	IFN-ɣ treated	TRUE	FALSE
HMMR	O75330	SETKLQEEL	Linear	(668=676)	IFN-ɣ treated	FALSE	FALSE
HMMR	O75330	LEESQGKIAQL	Linear	(202=212)	IFN-ɣ treated	FALSE	FALSE
HMMR	O75330	KLDEKSFL	Cis-Spliced	(223=227;532=534)	IFN-ɣ treated	TRUE	FALSE
HNRNPL	P14866	YAVDRAITHL	Linear	(430=439)	Both conditions	FALSE	FALSE
HNRNPL	P14866	FMFGQKLNV	Linear	(443=451)	Both conditions	FALSE	FALSE
HNRNPL	P14866	HPPPPPPPP	Linear	(365=373)	Both conditions	FALSE	FALSE
HNRNPL	P14866	YAVDRAITH	Linear	(430=438)	Both conditions	FALSE	FALSE
HNRNPL	P14866	HADSPVLMV	Linear	(378=386)	IFN-ɣ untreated	TRUE	FALSE
HNRNPL	P14866	YAADNQIYI	Linear	(156=164)	Both conditions	FALSE	FALSE
HNRNPL	P14866	AVDRAITHL	Linear	(431=439)	Both conditions	FALSE	FALSE
HNRNPL	P14866	ITTDVLYTI	Linear	(206=214)	Both conditions	FALSE	FALSE
HNRNPL	P14866	AADNQIYI	Linear	(157=164)	Both conditions	TRUE	FALSE
HNRNPL	P14866	GLIDGVVEA	Linear	(108=116)	Both conditions	FALSE	FALSE
HNRNPL	P14866	CLYGNVEKV	Linear	(404=412)	IFN-ɣ treated	FALSE	FALSE
HNRNPL	P14866	FMFGQKLNVC	Linear	(443=452)	IFN-ɣ treated	TRUE	FALSE
HNRNPL	P14866	KFMKSKPGAAM	Linear	(413=423)	IFN-ɣ treated	TRUE	FALSE
HNRNPL	P14866	AMVEMADGYAV	Linear	(422=432)	IFN-ɣ treated	FALSE	FALSE
HNRNPL	P14866	IEYAKPTRL	Linear	(265=273)	Both conditions	FALSE	FALSE
HNRNPL	P14866	LEWESKSDAL	Linear	(547=556)	IFN-ɣ treated	FALSE	FALSE
HNRNPL	P14866	VDRAITHL	Linear	(432=439)	IFN-ɣ treated	TRUE	FALSE
HNRNPL	P14866	LYGNVEKV	Linear	(405=412)	IFN-ɣ treated	TRUE	FALSE
HNRNPL	P14866	EYAKPTRL	Linear	(266=273)	IFN-ɣ treated	FALSE	FALSE
HNRNPL	P14866	GLIDGVVEADL	Linear	(108=118)	IFN-ɣ treated	FALSE	FALSE
HNRNPL	P14866	VEADLVEAL	Linear	(114=122)	Both conditions	FALSE	FALSE
HNRNPL	P14866	NPNGPYPY	Linear	(569=576)	IFN-ɣ treated	TRUE	FALSE
HNRNPL	P14866	WESKSDALETL	Linear	(549=559)	IFN-ɣ treated	TRUE	FALSE
HNRNPL	P14866	MCLYGNVEKV	Cis-Spliced	(1;404=412)	IFN-ɣ treated	TRUE	FALSE
HNRNPL	P14866	MPYGNVEKV	Cis-Spliced	(460=461;406=412)	Both conditions	TRUE	FALSE
HNRNPL	P14866	QPALYGNVEKV	Cis-Spliced	(456=458;405=412)	IFN-ɣ treated	TRUE	FALSE
HNRNPL	P14866	RQLYGNVEKV	Cis-Spliced	(305=306;405=412)	IFN-ɣ treated	TRUE	FALSE
HNRNPL	P14866	TPFCLYGNVEKV	Cis-Spliced	(487=488;403=412)	Both conditions	TRUE	FALSE
HUWE1	Q7Z6Z7	HLYSSIEHLTT	Linear	(111=121)	Both conditions	FALSE	FALSE
HUWE1	Q7Z6Z7	YLLTHPPPIM	Linear	(1351=1360)	Both conditions	FALSE	FALSE
HUWE1	Q7Z6Z7	FAETHRTVL	Linear	(3958=3966)	Both conditions	TRUE	FALSE
HUWE1	Q7Z6Z7	AALGRALAM	Linear	(2158=2166)	IFN-ɣ untreated	FALSE	FALSE
HUWE1	Q7Z6Z7	YADPGAEVKI	Linear	(203=212)	IFN-ɣ untreated	FALSE	FALSE
HUWE1	Q7Z6Z7	ALFSFLYHL	Linear	(385=393)	Both conditions	FALSE	FALSE
HUWE1	Q7Z6Z7	NLWNRKPLKV	Linear	(1255=1264)	Both conditions	FALSE	FALSE
HUWE1	Q7Z6Z7	AEDKDTPAL	Linear	(2123=2131)	Both conditions	FALSE	FALSE
HUWE1	Q7Z6Z7	HADHSSLTL	Linear	(2522=2530)	Both conditions	FALSE	FALSE
HUWE1	Q7Z6Z7	GLSIFIYRL	Linear	(452=460)	Both conditions	FALSE	FALSE
HUWE1	Q7Z6Z7	SAILRSPAF	Linear	(3122=3130)	Both conditions	FALSE	FALSE
HUWE1	Q7Z6Z7	GLVNDLARV	Linear	(2220=2228)	Both conditions	FALSE	FALSE
HUWE1	Q7Z6Z7	LLIKDVPAT	Linear	(589=597)	Both conditions	FALSE	FALSE
HUWE1	Q7Z6Z7	ELMRHQPTL	Linear	(665=673)	IFN-ɣ untreated	TRUE	FALSE
HUWE1	Q7Z6Z7	KAALGRAL	Linear	(2157=2164)	IFN-ɣ untreated	FALSE	FALSE
HUWE1	Q7Z6Z7	REDDLIIEF	Linear	(2487=2495)	Both conditions	TRUE	FALSE
HUWE1	Q7Z6Z7	HIHPQAAPV	Linear	(3323=3331)	IFN-ɣ untreated	FALSE	FALSE
HUWE1	Q7Z6Z7	RLHAISILV	Linear	(280=288)	IFN-ɣ untreated	TRUE	FALSE
HUWE1	Q7Z6Z7	YAMMFAELKST	Linear	(1791=1801)	IFN-ɣ untreated	TRUE	FALSE
HUWE1	Q7Z6Z7	TLIANYSYT	Linear	(2087=2095)	IFN-ɣ untreated	TRUE	FALSE
HUWE1	Q7Z6Z7	LLATEVVTV	Linear	(556=564)	Both conditions	FALSE	FALSE
HUWE1	Q7Z6Z7	RSLLSILQ	Linear	(3224=3231)	Both conditions	TRUE	FALSE
HUWE1	Q7Z6Z7	KENKGNDTPL	Linear	(1715=1724)	IFN-ɣ untreated	TRUE	FALSE
HUWE1	Q7Z6Z7	ATTLHFEF	Linear	(195=202)	Both conditions	TRUE	FALSE
HUWE1	Q7Z6Z7	EIMESLTK	Linear	(238=245)	IFN-ɣ untreated	TRUE	FALSE
HUWE1	Q7Z6Z7	IEHLTTLL	Linear	(116=123)	Both conditions	FALSE	FALSE
HUWE1	Q7Z6Z7	TLIANYSYTV	Linear	(2087=2096)	IFN-ɣ untreated	TRUE	FALSE
HUWE1	Q7Z6Z7	YLLENDVSTL	Linear	(4159=4168)	IFN-ɣ untreated	TRUE	FALSE
HUWE1	Q7Z6Z7	GMMEALLKV	Linear	(407=415)	Both conditions	FALSE	FALSE
HUWE1	Q7Z6Z7	LLAELREYNL	Linear	(3641=3650)	Both conditions	FALSE	FALSE
HUWE1	Q7Z6Z7	TMEQATEYL	Linear	(1344=1352)	IFN-ɣ untreated	TRUE	FALSE
HUWE1	Q7Z6Z7	FGHSSTSAL	Linear	(3113=3121)	Both conditions	FALSE	FALSE
HUWE1	Q7Z6Z7	SEIRSISVNQW	Linear	(915=925)	Both conditions	FALSE	FALSE
HUWE1	Q7Z6Z7	LVWESTVLL	Linear	(944=952)	Both conditions	TRUE	FALSE
HUWE1	Q7Z6Z7	TTDDHCQEF	Linear	(785=793)	IFN-ɣ treated	FALSE	FALSE
HUWE1	Q7Z6Z7	EEVQAMQSF	Linear	(733=741)	IFN-ɣ treated	FALSE	FALSE
HUWE1	Q7Z6Z7	YIMMFVHTC	Linear	(902=910)	IFN-ɣ treated	TRUE	FALSE
HUWE1	Q7Z6Z7	ELFGLLVKL	Linear	(1065=1073)	IFN-ɣ treated	TRUE	FALSE
HUWE1	Q7Z6Z7	SMHDCVSVV	Linear	(2662=2670)	IFN-ɣ treated	TRUE	FALSE
HUWE1	Q7Z6Z7	GEPVIRERL	Linear	(1283=1291)	IFN-ɣ treated	FALSE	FALSE
HUWE1	Q7Z6Z7	AELKSTRMI	Linear	(1796=1804)	IFN-ɣ treated	TRUE	FALSE
HUWE1	Q7Z6Z7	MESEDYHFY	Linear	(4146=4154)	IFN-ɣ treated	FALSE	FALSE
HUWE1	Q7Z6Z7	TEDMVTVLI	Linear	(1751=1759)	IFN-ɣ treated	TRUE	FALSE
HUWE1	Q7Z6Z7	KQMLLFTH	Linear	(253=260)	IFN-ɣ treated	TRUE	FALSE
HUWE1	Q7Z6Z7	TLCKQIGTL	Linear	(3633=3641)	IFN-ɣ treated	TRUE	FALSE
HUWE1	Q7Z6Z7	REHAMEALL	Linear	(1332=1340)	IFN-ɣ treated	TRUE	FALSE
HUWE1	Q7Z6Z7	AEADAIIQM	Linear	(3770=3778)	IFN-ɣ treated	FALSE	FALSE
HUWE1	Q7Z6Z7	TEQELELLI	Linear	(4243=4251)	IFN-ɣ treated	FALSE	FALSE
HUWE1	Q7Z6Z7	ACVSMLGVP	Linear	(1761=1769)	IFN-ɣ treated	TRUE	FALSE
HUWE1	Q7Z6Z7	LFLASLAAAGSG	Linear	(2134=2145)	IFN-ɣ treated	TRUE	FALSE
HUWE1	Q7Z6Z7	IDPSMDPYPHQ	Linear	(371=381)	IFN-ɣ treated	TRUE	FALSE
HUWE1	Q7Z6Z7	GEAETTQMEL	Linear	(2816=2825)	IFN-ɣ treated	TRUE	FALSE
HUWE1	Q7Z6Z7	TDATTAIIKLL	Linear	(675=685)	IFN-ɣ treated	TRUE	FALSE
HUWE1	Q7Z6Z7	NQQVVGTEERI	Linear	(752=762)	IFN-ɣ treated	TRUE	FALSE
HUWE1	Q7Z6Z7	LLISGLPTI	Linear	(4249=4257)	IFN-ɣ treated	FALSE	FALSE
HUWE1	Q7Z6Z7	LITNLDMAAF	Linear	(438=447)	IFN-ɣ treated	TRUE	FALSE
HUWE1	Q7Z6Z7	NTSRLHRV	Linear	(3201=3208)	IFN-ɣ treated	TRUE	FALSE
HUWE1	Q7Z6Z7	SVVKVSIV	Linear	(2668=2675)	IFN-ɣ treated	TRUE	FALSE
HUWE1	Q7Z6Z7	IKAALPLT	Linear	(1496=1503)	IFN-ɣ treated	TRUE	FALSE
HUWE1	Q7Z6Z7	IPIPLMDYI	Linear	(762=770)	IFN-ɣ treated	TRUE	FALSE
HUWE1	Q7Z6Z7	AARSTASALTK	Linear	(1097=1107)	IFN-ɣ treated	TRUE	FALSE
HUWE1	Q7Z6Z7	ILYNGLIEEL	Linear	(300=309)	IFN-ɣ treated	TRUE	FALSE
HUWE1	Q7Z6Z7	QELELLISGL	Linear	(4245=4254)	IFN-ɣ treated	TRUE	FALSE
HUWE1	Q7Z6Z7	QFTTMVQV	Linear	(1661=1668)	IFN-ɣ treated	TRUE	FALSE
HUWE1	Q7Z6Z7	HVLDTLIQL	Linear	(3335=3343)	IFN-ɣ treated	FALSE	FALSE
HUWE1	Q7Z6Z7	EERIPIPLMD	Linear	(759=768)	IFN-ɣ treated	TRUE	FALSE
HUWE1	Q7Z6Z7	LAIQECSEGFG	Linear	(4362=4372)	IFN-ɣ treated	TRUE	FALSE
HUWE1	Q7Z6Z7	ATLRLCLR	Linear	(1777=1784)	IFN-ɣ treated	TRUE	FALSE
HUWE1	Q7Z6Z7	SLPNVFSALC	Linear	(603=612)	IFN-ɣ treated	TRUE	FALSE
HUWE1	Q7Z6Z7	AEYYGPSLFLL	Linear	(547=557)	IFN-ɣ treated	TRUE	FALSE
HUWE1	Q7Z6Z7	AISTIVVAA	Linear	(3522=3530)	IFN-ɣ treated	TRUE	FALSE
HUWE1	Q7Z6Z7	AELFGLLVKL	Linear	(1064=1073)	IFN-ɣ treated	TRUE	FALSE
HUWE1	Q7Z6Z7	SEEEDPLAGISL	Linear	(2953=2964)	IFN-ɣ treated	TRUE	FALSE
HUWE1	Q7Z6Z7	AADGALLKL	Cis-Spliced	(2015=2018;680=684)	Both conditions	TRUE	FALSE
HUWE1	Q7Z6Z7	ALLDKLCL	Cis-Spliced	(21=25;611=613)	Both conditions	TRUE	FALSE
HUWE1	Q7Z6Z7	ASDGTLVR	Cis-Spliced	(3826=3830;2479=2481)	IFN-ɣ untreated	TRUE	FALSE
HUWE1	Q7Z6Z7	ASDGTVLR	Cis-Spliced	(3826=3830;3442=3444)	Both conditions	TRUE	FALSE
HUWE1	Q7Z6Z7	AVALELRSL	Cis-Spliced	(2932=2935;916=920)	Both conditions	TRUE	FALSE
HUWE1	Q7Z6Z7	GLLQALLKL	Cis-Spliced	(844=847;680=684)	IFN-ɣ treated	TRUE	FALSE
HUWE1	Q7Z6Z7	KLLRVTLLL	Cis-Spliced	(3452=3455;1820=1824)	IFN-ɣ untreated	TRUE	FALSE
HUWE1	Q7Z6Z7	LALPALVHL	Cis-Spliced	(1895=1899;334=337)	IFN-ɣ treated	TRUE	FALSE
HUWE1	Q7Z6Z7	LALPAPALV	Cis-Spliced	(3462=3465;3514=3518)	IFN-ɣ untreated	TRUE	FALSE
HUWE1	Q7Z6Z7	LASSLLHAL	Cis-Spliced	(123=126;892=896)	Both conditions	TRUE	FALSE
HUWE1	Q7Z6Z7	LGPAALPTA	Cis-Spliced	(1874=1878;2644=2647)	IFN-ɣ untreated	TRUE	FALSE
HUWE1	Q7Z6Z7	LLAELLRSL	Cis-Spliced	(3641=3645;3223=3226)	Both conditions	TRUE	FALSE
HUWE1	Q7Z6Z7	LLAELLRVL	Cis-Spliced	(2074=2077;1870=1874)	Both conditions	TRUE	FALSE
HUWE1	Q7Z6Z7	LLALRLLSL	Cis-Spliced	(3641=3643;3454=3459)	Both conditions	FALSE	FALSE
HUWE1	Q7Z6Z7	LLDKLLRLL	Cis-Spliced	(3180=3182;3452=3457)	IFN-ɣ treated	TRUE	FALSE
HUWE1	Q7Z6Z7	LLLQRLLLL	Cis-Spliced	(1745=1748;1529=1533)	IFN-ɣ untreated	TRUE	FALSE
HUWE1	Q7Z6Z7	LLVSRLSQA	Cis-Spliced	(2367=2371;2390=2393)	IFN-ɣ treated	TRUE	FALSE
HUWE1	Q7Z6Z7	LSNTLLRL	Cis-Spliced	(781=783;2070=2074)	IFN-ɣ treated	TRUE	FALSE
HUWE1	Q7Z6Z7	QLLSELRSL	Cis-Spliced	(33=35;915=920)	IFN-ɣ treated	TRUE	FALSE
HUWE1	Q7Z6Z7	SSNQSVVK	Cis-Spliced	(2287=2290;2668=2671)	IFN-ɣ untreated	TRUE	FALSE
HUWE1	Q7Z6Z7	TLDSLLTRL	Cis-Spliced	(1637=1640;159=163)	Both conditions	TRUE	FALSE
HUWE1	Q7Z6Z7	TSQAARLF	Cis-Spliced	(2635=2638;2132=2135)	IFN-ɣ treated	TRUE	FALSE
HUWE1	Q7Z6Z7	TVLLSLLLK	Cis-Spliced	(949=953;589=592)	IFN-ɣ untreated	TRUE	FALSE
HUWE1	Q7Z6Z7	VALSGLLRV	Cis-Spliced	(2933=2937;1870=1873)	Both conditions	TRUE	FALSE
HUWE1	Q7Z6Z7	VLSSQVLLK	Cis-Spliced	(2336=2340;1556=1559)	Both conditions	TRUE	FALSE
HUWE1	Q7Z6Z7	VTVLLRPVV	Cis-Spliced	(1755=1760;3330=3332)	IFN-ɣ treated	TRUE	FALSE
HUWE1	Q7Z6Z7	YLLENLRSL	Cis-Spliced	(4159=4163;3223=3226)	Both conditions	TRUE	FALSE
IFIT2	P09913	AIHHFIEGV	Linear	(391=399)	Both conditions	FALSE	FALSE
IFIT2	P09913	KADEANDNLF	Linear	(325=334)	Both conditions	FALSE	FALSE
IFIT2	P09913	FLQELNEKM	Linear	(438=446)	Both conditions	FALSE	FALSE
IFIT2	P09913	KADEANDNL	Linear	(325=333)	Both conditions	FALSE	FALSE
IFIT2	P09913	GEEEGEGEKL	Linear	(226=235)	Both conditions	TRUE	FALSE
IFIT2	P09913	AEIRSLVTW	Linear	(89=97)	Both conditions	FALSE	FALSE
IFIT2	P09913	KLLELIGHAV	Linear	(311=320)	Both conditions	TRUE	FALSE
IFIT2	P09913	NLLAYLKHL	Linear	(55=63)	Both conditions	TRUE	FALSE
IFIT2	P09913	RLSDVQIYV	Linear	(109=117)	Both conditions	FALSE	FALSE
IFIT2	P09913	SILASLHAL	Linear	(338=346)	Both conditions	FALSE	FALSE
IFIT2	P09913	KELTPVAKQLL	Linear	(363=373)	IFN-ɣ treated	FALSE	FALSE
IFIT2	P09913	CEDKAIHHF	Linear	(387=395)	IFN-ɣ treated	TRUE	FALSE
IFIT2	P09913	LEKAPGVTDVL	Linear	(240=250)	IFN-ɣ treated	FALSE	FALSE
IFIT2	P09913	FQKEFSKEL	Linear	(357=365)	IFN-ɣ treated	TRUE	FALSE
IFIT2	P09913	GADSEALHVL	Linear	(427=436)	IFN-ɣ treated	FALSE	FALSE
IFIT2	P09913	AEYYFQKEF	Linear	(353=361)	IFN-ɣ treated	FALSE	FALSE
IFIT2	P09913	QADEDSERGL	Linear	(448=457)	IFN-ɣ treated	TRUE	FALSE
IFIT2	P09913	GADSEALHV	Linear	(427=435)	IFN-ɣ treated	FALSE	FALSE
IFIT2	P09913	SEALHVLAF	Linear	(430=438)	IFN-ɣ treated	FALSE	FALSE
IFIT2	P09913	QEHADQAEI	Linear	(83=91)	IFN-ɣ treated	FALSE	FALSE
IFIT2	P09913	AEIRSLVT	Linear	(89=96)	IFN-ɣ treated	TRUE	FALSE
IFIT2	P09913	GEKLVEEAL	Linear	(232=240)	IFN-ɣ treated	TRUE	FALSE
IFIT2	P09913	RLNPDNQYL	Linear	(203=211)	IFN-ɣ treated	TRUE	FALSE
IFIT2	P09913	FLQELNEKMQ	Linear	(438=447)	IFN-ɣ treated	TRUE	FALSE
IFIT2	P09913	PVAKQLLH	Linear	(367=374)	IFN-ɣ treated	TRUE	FALSE
IFIT2	P09913	TPVAKQLL	Linear	(366=373)	IFN-ɣ treated	TRUE	FALSE
IFIT2	P09913	RLSDVQIYVDK	Linear	(109=119)	IFN-ɣ treated	FALSE	FALSE
IFIT2	P09913	NLMEGENSL	Linear	(23=31)	IFN-ɣ treated	TRUE	FALSE
IFIT2	P09913	EEAEYYFQKEF	Cis-Spliced	(237=238;353=361)	Both conditions	TRUE	FALSE
IGSF1	Q8N6C5	ELLAETPA	Cis-Spliced	(1057=1059;138=142)	Both conditions	TRUE	FALSE
IGSF1	Q8N6C5	LLMQVLKL	Cis-Spliced	(525=528;311=314)	IFN-ɣ treated	TRUE	FALSE
IGSF1	Q8N6C5	LLSVGLRSV	Cis-Spliced	(836=841;918=920)	Both conditions	TRUE	FALSE
IGSF1	Q8N6C5	SLDNLLLK	Cis-Spliced	(185=188;69=72)	Both conditions	TRUE	FALSE
IGSF10	Q6WRI0	ELLQPVWQL	Cis-Spliced	(537=538;371=377)	Both conditions	FALSE	FALSE
IGSF10	Q6WRI0	ELTLDPNL	Cis-Spliced	(723=726;1357=1360)	Both conditions	TRUE	FALSE
IGSF10	Q6WRI0	LELQPVWQL	Cis-Spliced	(388=389;371=377)	Both conditions	FALSE	FALSE
IGSF10	Q6WRI0	LQLQPVWQL	Cis-Spliced	(334=335;371=377)	IFN-ɣ treated	TRUE	FALSE
IGSF10	Q6WRI0	NLPLFRPVL	Cis-Spliced	(1003=1008;1029=1031)	Both conditions	TRUE	FALSE
IGSF10	Q6WRI0	PLANKLLL	Cis-Spliced	(686=688;941=945)	IFN-ɣ treated	TRUE	FALSE
IGSF10	Q6WRI0	YSNSTALK	Cis-Spliced	(1543=1545;862=866)	IFN-ɣ untreated	TRUE	FALSE
IGSF11	Q5DX21	LAGALGTPC	Cis-Spliced	(243=249;43=44)	Both conditions	TRUE	FALSE
IGSF11	Q5DX21	LLAGTCLL	Cis-Spliced	(242=245;225=228)	IFN-ɣ treated	TRUE	FALSE
IGSF21	Q96ID5	LSDNSLSL	Cis-Spliced	(108=111;228=231)	IFN-ɣ untreated	TRUE	FALSE
IGSF22	Q8N9C0	VSNLGKEL	Cis-Spliced	(422=425;364=367)	IFN-ɣ treated	TRUE	FALSE
IGSF3	O75054	AMPQTLHRV	Linear	(150=158)	IFN-ɣ untreated	TRUE	FALSE
IGSF3	O75054	KVGEKPVEV	Linear	(187=195)	Both conditions	FALSE	FALSE
IGSF3	O75054	EARGQLKV	Linear	(344=351)	IFN-ɣ treated	TRUE	FALSE
IGSF3	O75054	LLLNLLELR	Cis-Spliced	(729=731;667=672)	IFN-ɣ untreated	TRUE	FALSE
IGSF3	O75054	VLPPVLSCL	Cis-Spliced	(141=143;6=11)	Both conditions	TRUE	FALSE
IGSF8	Q969P0	HAAQVQRL	Cis-Spliced	(338=340;101=105)	IFN-ɣ untreated	TRUE	FALSE
IRF1	P10914	GEKEPDPKTW	Linear	(68=77)	Both conditions	FALSE	FALSE
IRF1	P10914	NVDGKGYLL	Linear	(250=258)	Both conditions	TRUE	FALSE
IRF1	P10914	YMQDLEVEQAL	Linear	(169=179)	IFN-ɣ treated	TRUE	FALSE
IRF1	P10914	LEVEQALTPAL	Linear	(173=183)	IFN-ɣ treated	TRUE	FALSE
IRF1	P10914	YMQDLEVEQA	Linear	(169=178)	IFN-ɣ treated	TRUE	FALSE
IRF1	P10914	VEQALTPAL	Linear	(175=183)	IFN-ɣ treated	FALSE	FALSE
IRF1	P10914	NFRCAMNSL	Linear	(80=88)	IFN-ɣ treated	TRUE	FALSE
IRF1	P10914	EEMIFQIPW	Linear	(30=38)	IFN-ɣ treated	FALSE	FALSE
IRF1	P10914	KEPDPKTW	Linear	(70=77)	IFN-ɣ treated	TRUE	FALSE
IRF1	P10914	WLDSLLTPV	Linear	(305=313)	IFN-ɣ treated	TRUE	FALSE
IRF1	P10914	EKEPDPKTW	Linear	(69=77)	IFN-ɣ treated	TRUE	FALSE
IRF1	P10914	LLTPVRLPSI	Linear	(309=318)	IFN-ɣ treated	TRUE	FALSE
IRF1	P10914	DLEVEQAL	Linear	(172=179)	IFN-ɣ treated	TRUE	FALSE
ITGA1	P56199	YENEEGKWVL	Linear	(54=63)	IFN-ɣ treated	TRUE	FALSE
ITGA1	P56199	TADQTEKHF	Cis-Spliced	(365=368;335=339)	IFN-ɣ untreated	TRUE	FALSE
ITGA1	P56199	VGLQFPVGR	Cis-Spliced	(948=952;83=86)	Both conditions	TRUE	FALSE
ITGA10	O75578	ALDNTNLHL	Cis-Spliced	(760=764;849=852)	IFN-ɣ untreated	TRUE	FALSE
ITGA10	O75578	LFLPTSLSL	Cis-Spliced	(9=12;840=844)	IFN-ɣ treated	TRUE	FALSE
ITGA11	Q9UKX5	FVYNGTLKDS	Linear	(525=534)	Both conditions	FALSE	FALSE
ITGA11	Q9UKX5	GEDVVHEFHL	Linear	(207=216)	Both conditions	TRUE	FALSE
ITGA11	Q9UKX5	GESHDSPDL	Linear	(272=280)	Both conditions	TRUE	FALSE
ITGA11	Q9UKX5	ALGDRIFSL	Linear	(344=352)	Both conditions	FALSE	FALSE
ITGA11	Q9UKX5	EEDPSRQIVF	Linear	(1121=1130)	Both conditions	TRUE	FALSE
ITGA11	Q9UKX5	FLHHLEIEL	Linear	(919=927)	Both conditions	FALSE	FALSE
ITGA11	Q9UKX5	GENAYSTVL	Linear	(848=856)	IFN-ɣ untreated	TRUE	FALSE
ITGA11	Q9UKX5	HVVEDGVLLGA	Linear	(374=384)	IFN-ɣ untreated	TRUE	FALSE
ITGA11	Q9UKX5	TADYVKPVTF	Linear	(739=748)	IFN-ɣ treated	TRUE	FALSE
ITGA11	Q9UKX5	FEFSKSIFL	Linear	(912=920)	IFN-ɣ treated	TRUE	FALSE
ITGA11	Q9UKX5	KETSAGKVIPL	Linear	(396=406)	IFN-ɣ treated	TRUE	FALSE
ITGA11	Q9UKX5	YLGYTVTSV	Linear	(424=432)	IFN-ɣ treated	TRUE	FALSE
ITGA11	Q9UKX5	LLNLLKSTV	Cis-Spliced	(185=190;853=855)	Both conditions	TRUE	FALSE
ITGA11	Q9UKX5	LTLPLLHQA	Cis-Spliced	(1007=1011;467=470)	Both conditions	TRUE	FALSE
ITGA11	Q9UKX5	TDEAPVVQL	Cis-Spliced	(333=336;637=641)	Both conditions	TRUE	FALSE
ITGA2	P17301	FINPKGNWLL	Linear	(55=64)	Both conditions	FALSE	FALSE
ITGA2	P17301	LLYDAEIHL	Linear	(932=940)	Both conditions	FALSE	FALSE
ITGA2	P17301	ALSQGILNCC	Linear	(18=27)	IFN-ɣ untreated	TRUE	FALSE
ITGA2	P17301	LDVRQIPA	Linear	(801=808)	IFN-ɣ treated	TRUE	FALSE
ITGA2	P17301	TLVNKNAQII	Linear	(667=676)	IFN-ɣ treated	TRUE	FALSE
ITGA2	P17301	AVLGYLHFV	Cis-Spliced	(310=315;451=453)	IFN-ɣ treated	TRUE	FALSE
ITGA2	P17301	LLQDRLWKL	Cis-Spliced	(427=431;1153=1156)	IFN-ɣ untreated	TRUE	FALSE
ITGA2B	P08514	AVAALAVHL	Cis-Spliced	(406=409;680=684)	IFN-ɣ treated	TRUE	FALSE
ITGA2B	P08514	VADLQTRL	Cis-Spliced	(231=234;626=629)	Both conditions	TRUE	FALSE
ITGA4	P13612	LLYQGPHNTL	Linear	(42=51)	Both conditions	FALSE	FALSE
ITGA4	P13612	AESPPRFYF	Linear	(527=535)	IFN-ɣ untreated	FALSE	FALSE
ITGA4	P13612	VEKMNLTFHV	Linear	(802=811)	IFN-ɣ treated	TRUE	FALSE
ITGA4	P13612	SLSHYEVKL	Cis-Spliced	(472=475;772=776)	Both conditions	TRUE	FALSE
ITGA5	P08648	HTPDFFGSAL	Linear	(451=460)	Both conditions	FALSE	FALSE
ITGA5	P08648	IEDKAQILL	Linear	(635=643)	Both conditions	FALSE	FALSE
ITGA5	P08648	LLPPPPRVGG	Linear	(32=41)	Both conditions	FALSE	FALSE
ITGA5	P08648	QEVGRVYVY	Linear	(360=368)	IFN-ɣ treated	TRUE	FALSE
ITGA5	P08648	SLYNFSGEQMAS	Linear	(313=324)	IFN-ɣ treated	TRUE	FALSE
ITGA5	P08648	YLINLVQGQLQT	Linear	(249=260)	IFN-ɣ treated	TRUE	FALSE
ITGA5	P08648	YLGYSVAV	Linear	(271=278)	IFN-ɣ treated	TRUE	FALSE
ITGA5	P08648	IEFDSKGSRL	Linear	(111=120)	IFN-ɣ treated	TRUE	FALSE
ITGA5	P08648	YLINLVQGQL	Linear	(249=258)	IFN-ɣ treated	TRUE	FALSE
ITGA5	P08648	NLDAEAPAV	Linear	(43=51)	IFN-ɣ treated	FALSE	FALSE
ITGA5	P08648	LLPPPPPAL	Cis-Spliced	(32=37;625=627)	Both conditions	TRUE	FALSE
ITGA5	P08648	QLLSKLNGV	Cis-Spliced	(766=770;794=797)	IFN-ɣ treated	TRUE	FALSE
ITGA6	P23229	TEKQIDDNRKF	Linear	(944=954)	Both conditions	FALSE	FALSE
ITGA6	P23229	REDNVIRKY	Linear	(29=37)	Both conditions	FALSE	FALSE
ITGA6	P23229	KFGSCQQGV	Linear	(184=192)	IFN-ɣ untreated	TRUE	FALSE
ITGA6	P23229	RNSNVTFYLV	Linear	(784=793)	IFN-ɣ treated	TRUE	FALSE
ITGA6	P23229	LEKKQWIT	Linear	(1114=1121)	IFN-ɣ treated	TRUE	FALSE
ITGA6	P23229	SLPEVLPIL	Linear	(638=646)	IFN-ɣ treated	FALSE	FALSE
ITGA6	P23229	LLWKELLL	Cis-Spliced	(1074=1077;833=836)	IFN-ɣ treated	TRUE	FALSE
ITGA7	Q13683	HEIANGKWLL	Linear	(911=920)	IFN-ɣ untreated	TRUE	FALSE
ITGA7	Q13683	SLADTAVLFRA	Linear	(505=515)	IFN-ɣ untreated	FALSE	FALSE
ITGA7	Q13683	LLYPMQVEL	Linear	(919=927)	IFN-ɣ untreated	FALSE	FALSE
ITGA7	Q13683	HLDDGPYEA	Linear	(240=248)	IFN-ɣ untreated	TRUE	FALSE
ITGA7	Q13683	HEAQLLVML	Linear	(753=761)	IFN-ɣ untreated	TRUE	FALSE
ITGA7	Q13683	KEEKTGTIL	Linear	(1136=1144)	Both conditions	FALSE	FALSE
ITGA7	Q13683	SFVAGAPRAN	Linear	(324=333)	IFN-ɣ untreated	TRUE	FALSE
ITGA7	Q13683	QVTFYLIL	Linear	(803=810)	IFN-ɣ untreated	TRUE	FALSE
ITGA7	Q13683	AADGHPEL	Linear	(1163=1170)	IFN-ɣ treated	TRUE	FALSE
ITGA7	Q13683	LADTAVLF	Linear	(506=513)	IFN-ɣ treated	TRUE	FALSE
ITGAD	Q13349	LALDLLRSL	Cis-Spliced	(676=679;611=615)	Both conditions	TRUE	FALSE
ITGAD	Q13349	LFLGAHRV	Cis-Spliced	(364=368;111=113)	IFN-ɣ treated	TRUE	FALSE
ITGAD	Q13349	LLSVLAQY	Cis-Spliced	(8=13;191=192)	Both conditions	TRUE	FALSE
ITGAD	Q13349	LLSVLAYQ	Cis-Spliced	(8=13;426=427)	Both conditions	TRUE	FALSE
ITGAE	P38570	LFHTLTHTL	Cis-Spliced	(3=7;956=959)	IFN-ɣ untreated	TRUE	FALSE
ITGAE	P38570	LLGAVAVK	Cis-Spliced	(417=420;1019=1022)	IFN-ɣ treated	TRUE	FALSE
ITGAL	P20701	LDAAPLNL	Cis-Spliced	(273=276;922=925)	IFN-ɣ treated	TRUE	FALSE
ITGAL	P20701	LLTNVLLLL	Cis-Spliced	(229=232;258=262)	IFN-ɣ untreated	TRUE	FALSE
ITGAL	P20701	TLLPLLHQV	Cis-Spliced	(915=919;946=949)	Both conditions	TRUE	FALSE
ITGAM	P11215	FLFGSLRQ	Cis-Spliced	(124=128;130=132)	Both conditions	TRUE	FALSE
ITGAM	P11215	LLAGHVLLL	Cis-Spliced	(102=104;607=612)	IFN-ɣ treated	TRUE	FALSE
ITGAM	P11215	SLLPLRVLL	Cis-Spliced	(160=163;3=7)	IFN-ɣ treated	TRUE	FALSE
ITGAV	P06756	KLQEVGQVSV	Linear	(338=347)	Both conditions	FALSE	FALSE
ITGAV	P06756	SGDFQTTKL	Linear	(353=361)	IFN-ɣ untreated	TRUE	FALSE
ITGAV	P06756	KENQNHSYSL	Linear	(941=950)	Both conditions	TRUE	FALSE
ITGAV	P06756	SEMDTSVKF	Linear	(735=743)	Both conditions	FALSE	FALSE
ITGAV	P06756	YAKDDPLEF	Linear	(110=118)	Both conditions	FALSE	FALSE
ITGAV	P06756	FLQDGTKTV	Linear	(159=167)	Both conditions	FALSE	FALSE
ITGAV	P06756	KIYIGDDNPL	Linear	(646=655)	IFN-ɣ untreated	TRUE	FALSE
ITGAV	P06756	FLQDGTKTVE	Linear	(159=168)	IFN-ɣ treated	TRUE	FALSE
ITGAV	P06756	EEDVGPVVQH	Linear	(799=808)	IFN-ɣ treated	TRUE	FALSE
ITGAV	P06756	SLYNFTGEQMAA	Linear	(293=304)	IFN-ɣ treated	TRUE	FALSE
ITGAV	P06756	FLLDKKGL	Cis-Spliced	(65=67;398=402)	IFN-ɣ treated	TRUE	FALSE
ITGAV	P06756	KLLATLLYL	Cis-Spliced	(134=137;837=841)	Both conditions	TRUE	FALSE
ITGAV	P06756	LLGGVGPVV	Cis-Spliced	(200=203;802=806)	Both conditions	TRUE	FALSE
ITGAV	P06756	LLNDRVLL	Cis-Spliced	(483=485;197=201)	Both conditions	TRUE	FALSE
ITGAX	P20702	ALWKGVQSL	Linear	(412=420)	IFN-ɣ untreated	FALSE	FALSE
ITGAX	P20702	TMMNFVRAV	Linear	(169=177)	IFN-ɣ treated	FALSE	FALSE
ITGAX	P20702	SLLASVHQL	Linear	(214=222)	Both conditions	FALSE	FALSE
ITGAX	P20702	HIQKNPVL	Linear	(1013=1020)	IFN-ɣ treated	TRUE	FALSE
ITGAX	P20702	LLTAVLVLL	Cis-Spliced	(1122=1126;475=478)	IFN-ɣ treated	TRUE	FALSE
ITGAX	P20702	VTLDLLKDL	Cis-Spliced	(675=679;322=325)	IFN-ɣ treated	TRUE	FALSE
ITGB1	P05556	SENNIQTIF	Linear	(327=335)	Both conditions	FALSE	FALSE
ITGB1	P05556	FLQEGMPTSA	Linear	(53=62)	Both conditions	TRUE	FALSE
ITGB1	P05556	SMKDDLENV	Linear	(154=162)	Both conditions	FALSE	FALSE
ITGB1	P05556	SEVILENGKL	Linear	(380=389)	Both conditions	FALSE	FALSE
ITGB1	P05556	YLMDLSYSM	Linear	(147=155)	Both conditions	FALSE	FALSE
ITGB1	P05556	AEDYPIDLYYL	Linear	(138=148)	Both conditions	TRUE	FALSE
ITGB1	P05556	LIIDAYNSL	Linear	(370=378)	IFN-ɣ treated	TRUE	FALSE
ITGB1	P05556	KLSENNIQT	Linear	(325=333)	IFN-ɣ treated	TRUE	FALSE
ITGB3	P05106	VEDYPVDIYYL	Linear	(133=143)	Both conditions	TRUE	FALSE
ITGB3	P05106	LEVRDLPEEL	Linear	(383=392)	IFN-ɣ treated	TRUE	FALSE
ITGB3	P05106	YEDSSGKSIL	Linear	(696=705)	IFN-ɣ treated	TRUE	FALSE
ITGB3	P05106	EEERARAKW	Linear	(757=765)	IFN-ɣ treated	FALSE	FALSE
ITGB3	P05106	TMDYPSLGL	Linear	(312=320)	IFN-ɣ treated	FALSE	FALSE
ITGB3	P05106	LSYSMKDDLWSI	Linear	(146=157)	IFN-ɣ treated	TRUE	FALSE
ITGB3	P05106	TANNPLYKEAT	Linear	(767=777)	IFN-ɣ treated	TRUE	FALSE
ITGB3	P05106	KGPDILVVLLS	Linear	(715=725)	IFN-ɣ treated	TRUE	FALSE
ITGB3	P05106	FEEERARAKW	Linear	(756=765)	IFN-ɣ treated	TRUE	FALSE
ITGB3	P05106	SELIPGTTVGVL	Linear	(348=359)	IFN-ɣ treated	TRUE	FALSE
ITGB3	P05106	LGLRLALRL	Cis-Spliced	(318=320;113=118)	Both conditions	TRUE	FALSE
ITGB3	P05106	LTDQVLKL	Cis-Spliced	(222=226;415=417)	Both conditions	TRUE	FALSE
ITGB4	P16144	TEETQIDTTL	Linear	(87=96)	IFN-ɣ untreated	TRUE	FALSE
ITGB4	P16144	HLLDSKVPSV	Linear	(1172=1181)	Both conditions	FALSE	FALSE
ITGB4	P16144	RTCEECNFKV	Linear	(646=655)	IFN-ɣ untreated	TRUE	FALSE
ITGB4	P16144	FAFPGSTNSL	Linear	(1449=1458)	Both conditions	FALSE	FALSE
ITGB4	P16144	EELDLRRVTW	Linear	(1381=1390)	Both conditions	TRUE	FALSE
ITGB4	P16144	HTYFPVSSL	Linear	(337=345)	IFN-ɣ untreated	TRUE	FALSE
ITGB4	P16144	TSDYTIGFGKF	Linear	(164=174)	IFN-ɣ untreated	TRUE	FALSE
ITGB4	P16144	LLDSKVPSV	Linear	(1173=1181)	Both conditions	FALSE	FALSE
ITGB4	P16144	SESEAHLL	Linear	(1167=1174)	Both conditions	FALSE	FALSE
ITGB4	P16144	VLDGGKSQV	Linear	(1016=1024)	IFN-ɣ untreated	TRUE	FALSE
ITGB4	P16144	TADQDARGM	Linear	(924=932)	Both conditions	FALSE	FALSE
ITGB4	P16144	GGFDAILQT	Linear	(234=242)	IFN-ɣ untreated	TRUE	FALSE
ITGB4	P16144	KELQVKLLEL	Linear	(1055=1064)	IFN-ɣ treated	TRUE	FALSE
ITGB4	P16144	ESPVDLYIL	Linear	(127=135)	Both conditions	FALSE	FALSE
ITGB4	P16144	LLRLLPLLL	Cis-Spliced	(1070=1072;714=719)	IFN-ɣ treated	TRUE	FALSE
ITGB4	P16144	RPEPGSTNSL	Cis-Spliced	(951=953;1452=1458)	Both conditions	TRUE	FALSE
ITGB5	P18084	EEMRKLTSNF	Linear	(166=175)	Both conditions	TRUE	FALSE
ITGB5	P18084	RVDSFNEEV	Linear	(226=234)	IFN-ɣ untreated	TRUE	FALSE
ITGB5	P18084	SVWDQPEDLNL	Linear	(385=395)	Both conditions	TRUE	FALSE
ITGB5	P18084	AENNINLIF	Linear	(327=335)	Both conditions	FALSE	FALSE
ITGB5	P18084	FVDKDISPF	Linear	(182=190)	Both conditions	FALSE	FALSE
ITGB5	P18084	GENQSVYQNL	Linear	(503=512)	IFN-ɣ treated	TRUE	FALSE
ITGB5	P18084	SVWDQPEDLNLF	Linear	(385=396)	IFN-ɣ treated	TRUE	FALSE
ITGB5	P18084	YLMDLSLSM	Linear	(142=150)	IFN-ɣ treated	TRUE	FALSE
ITGB5	P18084	CHLNEANEYT	Linear	(300=309)	IFN-ɣ treated	TRUE	FALSE
ITGB5	P18084	FESEFGKIY	Linear	(536=544)	IFN-ɣ treated	FALSE	FALSE
ITGB5	P18084	ALLGELPRL	Cis-Spliced	(320=324;19=22)	Both conditions	TRUE	FALSE
ITGB5	P18084	ALLPRLAGA	Cis-Spliced	(17=23;619=620)	Both conditions	TRUE	FALSE
ITGB5	P18084	LLLNAKLLV	Cis-Spliced	(370=374;743=746)	IFN-ɣ treated	TRUE	FALSE
ITGB7	P26010	VEDDARGTVVL	Linear	(702=712)	Both conditions	FALSE	FALSE
KIF20B	Q96Q89	QENNEGLRAF	Linear	(881=890)	IFN-ɣ untreated	FALSE	FALSE
KIF20B	Q96Q89	READFKETLL	Linear	(616=625)	Both conditions	FALSE	FALSE
KIF20B	Q96Q89	ISDDRNSSV	Linear	(1684=1692)	Both conditions	FALSE	FALSE
KIF20B	Q96Q89	KEHENNTDVL	Linear	(1429=1438)	Both conditions	TRUE	FALSE
KIF20B	Q96Q89	ALLRQIKEV	Linear	(218=226)	Both conditions	FALSE	FALSE
KIF20B	Q96Q89	TENDQSTRF	Linear	(1610=1618)	Both conditions	FALSE	FALSE
KIF20B	Q96Q89	AEIEDIRVL	Linear	(872=880)	Both conditions	FALSE	FALSE
KIF20B	Q96Q89	READFKETL	Linear	(616=624)	Both conditions	FALSE	FALSE
KIF20B	Q96Q89	EADFKETLL	Linear	(617=625)	Both conditions	TRUE	FALSE
KIF20B	Q96Q89	QEGVPRPSY	Linear	(7=15)	Both conditions	FALSE	FALSE
KIF20B	Q96Q89	ALSELTQGV	Linear	(1148=1156)	Both conditions	FALSE	FALSE
KIF20B	Q96Q89	KLKEEITQL	Linear	(1224=1232)	IFN-ɣ untreated	FALSE	FALSE
KIF20B	Q96Q89	LNVLKFSAI	Linear	(467=475)	IFN-ɣ untreated	TRUE	FALSE
KIF20B	Q96Q89	TEKDSDLQKW	Linear	(1509=1518)	Both conditions	FALSE	FALSE
KIF20B	Q96Q89	EELQEKNVTL	Linear	(1126=1135)	Both conditions	FALSE	FALSE
KIF20B	Q96Q89	RETGNINTSLL	Linear	(398=408)	IFN-ɣ treated	TRUE	FALSE
KIF20B	Q96Q89	KEELQEKNVTL	Linear	(1125=1135)	IFN-ɣ treated	FALSE	FALSE
KIF20B	Q96Q89	GELIKTKEEL	Linear	(729=738)	IFN-ɣ treated	TRUE	FALSE
KIF20B	Q96Q89	EEVTQEFTQYW	Linear	(603=613)	IFN-ɣ treated	FALSE	FALSE
KIF20B	Q96Q89	FLLTIENEL	Linear	(890=898)	Both conditions	FALSE	FALSE
KIF20B	Q96Q89	KEEIASKSALL	Linear	(210=220)	IFN-ɣ treated	TRUE	FALSE
KIF20B	Q96Q89	ILDSQTVVL	Linear	(83=91)	IFN-ɣ treated	FALSE	FALSE
KIF20B	Q96Q89	GPATTQKEF	Linear	(120=128)	IFN-ɣ treated	TRUE	FALSE
KIF20B	Q96Q89	REILEENAERRL	Linear	(628=639)	IFN-ɣ treated	TRUE	FALSE
KIF20B	Q96Q89	KNLTLSKEVQ	Linear	(925=934)	IFN-ɣ treated	TRUE	FALSE
KIF20B	Q96Q89	SEFEESIKDY	Linear	(247=256)	IFN-ɣ treated	FALSE	FALSE
KIF20B	Q96Q89	TREEAAKDI	Linear	(651=659)	IFN-ɣ treated	TRUE	FALSE
KIF20B	Q96Q89	KELETLKAL	Cis-Spliced	(1164=1168;1533=1536)	IFN-ɣ treated	TRUE	FALSE
KIF20B	Q96Q89	KLLDLLSPSL	Cis-Spliced	(575=580;1740=1743)	IFN-ɣ treated	TRUE	FALSE
KIF20B	Q96Q89	LEALVKDLL	Cis-Spliced	(1057=1060;137=141)	IFN-ɣ treated	TRUE	FALSE
KIF20B	Q96Q89	LGLLPRLKL	Cis-Spliced	(169=173;1317=1320)	IFN-ɣ untreated	TRUE	FALSE
KIF20B	Q96Q89	LLEDLGPV	Cis-Spliced	(579=583;494=496)	Both conditions	TRUE	FALSE
KIF20B	Q96Q89	LLNEVHLL	Cis-Spliced	(587=590;81=84)	IFN-ɣ treated	TRUE	FALSE
KIF20B	Q96Q89	LLQEREYLR	Cis-Spliced	(624=627;199=203)	Both conditions	TRUE	FALSE
KIF20B	Q96Q89	LTNNVVKL	Cis-Spliced	(975=979;357=359)	IFN-ɣ treated	TRUE	FALSE
KIF20B	Q96Q89	TLLQELKAL	Cis-Spliced	(623=627;1533=1536)	IFN-ɣ treated	TRUE	FALSE
KIF20B	Q96Q89	VADLQRTL	Cis-Spliced	(686=689;1338=1341)	IFN-ɣ untreated	TRUE	FALSE
KRT18	P05783	VIDDTNITRL	Linear	(188=197)	Both conditions	FALSE	FALSE
KRT18	P05783	RLLEDGEDFNL	Linear	(382=392)	Both conditions	FALSE	FALSE
KRT18	P05783	LESKIREHL	Linear	(108=116)	Both conditions	FALSE	FALSE
KRT18	P05783	SETNDTKVL	Linear	(420=428)	Both conditions	FALSE	FALSE
KRT18	P05783	TVDNARIVL	Linear	(144=152)	Both conditions	FALSE	FALSE
KRT18	P05783	AADDFRVKY	Linear	(160=168)	Both conditions	TRUE	FALSE
KRT18	P05783	TEIEALKEELL	Linear	(201=211)	Both conditions	FALSE	FALSE
KRT18	P05783	REVEARYAL	Linear	(325=333)	Both conditions	FALSE	FALSE
KRT18	P05783	ALLNIKVKL	Linear	(365=373)	Both conditions	FALSE	FALSE
KRT18	P05783	YGARPVSSA	Linear	(24=32)	Both conditions	TRUE	FALSE
KRT18	P05783	SYGARPVS	Linear	(23=30)	Both conditions	TRUE	FALSE
KRT18	P05783	TEIEALKEEL	Linear	(201=210)	Both conditions	FALSE	FALSE
KRT18	P05783	YEALLNIKV	Linear	(363=371)	Both conditions	FALSE	FALSE
KRT18	P05783	RLASYLDRV	Linear	(90=98)	Both conditions	FALSE	FALSE
KRT18	P05783	VEVDAPKSQDL	Linear	(235=245)	Both conditions	FALSE	FALSE
KRT18	P05783	ILLHLESEL	Linear	(341=349)	Both conditions	FALSE	FALSE
KRT18	P05783	ALLNIKVK	Linear	(365=372)	Both conditions	TRUE	FALSE
KRT18	P05783	QIDNARLAADDF	Linear	(153=164)	Both conditions	FALSE	FALSE
KRT18	P05783	RLAADDFRV	Linear	(158=166)	Both conditions	FALSE	FALSE
KRT18	P05783	NARLAADDF	Linear	(156=164)	Both conditions	FALSE	FALSE
KRT18	P05783	QLNGILLHL	Linear	(337=345)	Both conditions	FALSE	FALSE
KRT18	P05783	AEVGAAETTL	Linear	(287=296)	Both conditions	FALSE	FALSE
KRT18	P05783	AEGQRQAQEY	Linear	(354=363)	Both conditions	TRUE	FALSE
KRT18	P05783	LLNIKVKL	Linear	(366=373)	Both conditions	TRUE	FALSE
KRT18	P05783	GEDFNLGDAL	Linear	(387=396)	Both conditions	FALSE	FALSE
KRT18	P05783	MEQLNGILL	Linear	(335=343)	Both conditions	FALSE	FALSE
KRT18	P05783	YEALLNIKVKL	Linear	(363=373)	IFN-ɣ treated	TRUE	FALSE
KRT18	P05783	ISVSRSTSF	Linear	(46=54)	IFN-ɣ treated	FALSE	FALSE
KRT18	P05783	YRSLGSVQAP	Linear	(13=22)	IFN-ɣ treated	TRUE	FALSE
KRT18	P05783	TVEVDAPKSQDL	Linear	(234=245)	IFN-ɣ treated	TRUE	FALSE
KRT18	P05783	LQIDNARLAADD	Linear	(152=163)	IFN-ɣ treated	FALSE	FALSE
KRT18	P05783	AEIATYRRL	Linear	(375=383)	IFN-ɣ treated	TRUE	FALSE
KRT18	P05783	LQIDNARL	Linear	(152=159)	IFN-ɣ treated	FALSE	FALSE
KRT18	P05783	VKGLQAQIA	Linear	(221=229)	IFN-ɣ treated	TRUE	FALSE
KRT18	P05783	LEAEIATYR	Linear	(373=381)	IFN-ɣ treated	FALSE	FALSE
KRT18	P05783	AAETTLTEL	Linear	(291=299)	IFN-ɣ treated	FALSE	FALSE
KRT18	P05783	IEALKEELL	Linear	(203=211)	Both conditions	FALSE	FALSE
KRT18	P05783	ESKIREHL	Linear	(109=116)	IFN-ɣ treated	FALSE	FALSE
KRT18	P05783	KKNALLNLKVKL	Cis-Spliced	(214=216;365=373)	IFN-ɣ untreated	TRUE	FALSE
KRT18	P05783	KLLEDLANTV	Cis-Spliced	(131=136;142=145)	Both conditions	TRUE	FALSE
MAGEA1	P43355	KEADPTGHSY	Linear	(160=169)	Both conditions	FALSE	TRUE
MAGEA1	P43355	KVLEYVIKV	Linear	(278=286)	Both conditions	FALSE	TRUE
MAGEA1	P43355	SAYGEPRKL	Linear	(230=238)	Both conditions	FALSE	TRUE
MAGEA1	P43355	ALREEEEGV	Linear	(301=309)	Both conditions	FALSE	FALSE
MAGEA1	P43355	ADPTGHSYVL	Linear	(162=171)	IFN-ɣ untreated	TRUE	FALSE
MAGEA1	P43355	REEEGPSTSCIL	Linear	(83=94)	IFN-ɣ treated	TRUE	FALSE
MAGEA1	P43355	REEEGPSTSCI	Linear	(83=93)	IFN-ɣ treated	TRUE	FALSE
MAGEA1	P43355	KEADPTGHSYVL	Linear	(160=171)	IFN-ɣ treated	FALSE	FALSE
MAGEA1	P43355	AETSYVKVLEY	Linear	(272=282)	IFN-ɣ treated	FALSE	FALSE
MAGEA10	P43363	KEVDPTGHSFVL	Linear	(192=203)	Both conditions	TRUE	FALSE
MAGEA10	P43363	KEVDPTGHSF	Linear	(192=201)	Both conditions	FALSE	FALSE
MAGEA10	P43363	SLLKFLAKV	Linear	(310=318)	Both conditions	FALSE	FALSE
MAGEA10	P43363	GLYDGMEHL	Linear	(254=262)	Both conditions	FALSE	TRUE
MAGEA10	P43363	SEIDEKVTDL	Linear	(132=141)	Both conditions	TRUE	FALSE
MAGEA10	P43363	GLYDGMEHLI	Linear	(254=263)	Both conditions	FALSE	FALSE
MAGEA10	P43363	FLWGPRAHAEI	Linear	(296=306)	Both conditions	TRUE	FALSE
MAGEA10	P43363	GLYDGMEHLIY	Linear	(254=264)	IFN-ɣ untreated	TRUE	FALSE
MAGEA10	P43363	KEPITKAEIL	Linear	(152=161)	Both conditions	TRUE	FALSE
MAGEA10	P43363	LWGPRAHA	Linear	(297=304)	IFN-ɣ untreated	TRUE	FALSE
MAGEA10	P43363	VTDLVQFL	Linear	(138=145)	Both conditions	TRUE	FALSE
MAGEA10	P43363	YQMKEPITKA	Linear	(149=158)	Both conditions	TRUE	FALSE
MAGEA10	P43363	SLLKFLAK	Linear	(310=317)	IFN-ɣ untreated	FALSE	FALSE
MAGEA10	P43363	LLKFLAKV	Linear	(311=318)	Both conditions	FALSE	FALSE
MAGEA10	P43363	MLLVFGIDV	Linear	(183=191)	IFN-ɣ untreated	TRUE	FALSE
MAGEA10	P43363	KEESPSTLQVL	Linear	(113=123)	IFN-ɣ treated	TRUE	FALSE
MAGEA10	P43363	SLLKFLAKVN	Linear	(310=319)	Both conditions	TRUE	FALSE
MAGEA10	P43363	AEIRKMSLL	Linear	(304=312)	IFN-ɣ treated	TRUE	FALSE
MAGEA11	P43364	KEVDPTSHSYVL	Linear	(280=291)	Both conditions	FALSE	FALSE
MAGEA11	P43364	AETSKMKVL	Linear	(392=400)	IFN-ɣ untreated	TRUE	FALSE
MAGEA11	P43364	ALREEGEGV	Linear	(421=429)	Both conditions	FALSE	FALSE
MAGEA11	P43364	ILHDKIIDLV	Linear	(221=230)	Both conditions	TRUE	FALSE
MAGEA11	P43364	FLFGEPKRLLT	Linear	(350=360)	Both conditions	TRUE	FALSE
MAGEA11	P43364	KIIDLVHLL	Linear	(225=233)	IFN-ɣ untreated	TRUE	FALSE
MAGEA11	P43364	REDSGDFGL	Linear	(23=31)	Both conditions	TRUE	FALSE
MAGEA11	P43364	FLFGEPKRL	Linear	(350=358)	Both conditions	FALSE	FALSE
MAGEA11	P43364	LEDRSPRRT	Linear	(72=80)	IFN-ɣ untreated	TRUE	FALSE
MAGEA11	P43364	EDLGLVGAQA	Linear	(131=140)	IFN-ɣ untreated	TRUE	FALSE
MAGEA11	P43364	EDLGLVGAQAL	Linear	(131=141)	Both conditions	TRUE	FALSE
MAGEA11	P43364	KEVDPTSHSY	Linear	(280=289)	IFN-ɣ treated	FALSE	FALSE
MAGEA11	P43364	TDPACYEF	Linear	(377=384)	IFN-ɣ treated	TRUE	FALSE
MAGEA11	P43364	LFGEPKRL	Linear	(351=358)	IFN-ɣ treated	TRUE	FALSE
MAGEA11	P43364	ILHDKIIDL	Linear	(221=229)	Both conditions	TRUE	FALSE
MAGEA11	P43364	KAEMLGSVIK	Linear	(245=254)	IFN-ɣ treated	TRUE	FALSE
MAGEA12	P43365	KMAELVHFL	Linear	(112=120)	Both conditions	FALSE	FALSE
MAGEA12	P43365	REPFTKAEML	Linear	(127=136)	Both conditions	FALSE	FALSE
MAGEA12	P43365	TLVEVTLREV	Linear	(44=53)	Both conditions	FALSE	FALSE
MAGEA12	P43365	FQDFFPVIF	Linear	(143=151)	Both conditions	TRUE	FALSE
MAGEA12	P43365	KMAELVHFLL	Linear	(112=121)	Both conditions	TRUE	FALSE
MAGEA12	P43365	TQDLVQENYL	Linear	(247=256)	IFN-ɣ untreated	TRUE	FALSE
MAGEA12	P43365	ALAELVHFL	Cis-Spliced	(108=109;114=120)	Both conditions	TRUE	FALSE
MAGEA2	P43356	REPVTKAEML	Linear	(127=136)	Both conditions	FALSE	TRUE
MAGEA2	P43356	KMVELVHFL	Linear	(112=120)	Both conditions	FALSE	FALSE
MAGEA2	P43356	LEARGEAL	Linear	(16=23)	Both conditions	TRUE	FALSE
MAGEA2	P43356	IETSYVKVL	Linear	(279=287)	Both conditions	FALSE	FALSE
MAGEA2	P43356	YEFLWGPRAL	Linear	(269=278)	Both conditions	FALSE	FALSE
MAGEA2	P43356	FAHPRKLLM	Linear	(239=247)	IFN-ɣ treated	TRUE	FALSE
MAGEA2	P43356	LMQDLVQENYL	Linear	(246=256)	IFN-ɣ treated	TRUE	FALSE
MAGEA2	P43356	VEVVPISHL	Linear	(167=175)	Both conditions	FALSE	FALSE
MAGEA2	P43356	SVFAHPRKL	Linear	(237=245)	IFN-ɣ treated	FALSE	FALSE
MAGEA2	P43356	DLVQENYL	Linear	(249=256)	IFN-ɣ treated	TRUE	FALSE
MAGEA3	P43357	MEVDPIGHLY	Linear	(167=176)	Both conditions	FALSE	TRUE
MAGEA3	P43357	KVAELVHFLL	Linear	(112=121)	Both conditions	FALSE	FALSE
MAGEA3	P43357	VETSYVKVL	Linear	(279=287)	Both conditions	FALSE	FALSE
MAGEA3	P43357	MEVDPIGHL	Linear	(167=175)	Both conditions	FALSE	FALSE
MAGEA3	P43357	AELVHFLL	Linear	(114=121)	Both conditions	TRUE	FALSE
MAGEA3	P43357	AELVHFLLL	Linear	(114=122)	Both conditions	FALSE	TRUE
MAGEA3	P43357	KVAELVHFL	Linear	(112=120)	Both conditions	FALSE	TRUE
MAGEA3	P43357	KIWEELSVLEV	Linear	(220=230)	Both conditions	FALSE	FALSE
MAGEA3	P43357	QEAASSSSTL	Linear	(36=45)	IFN-ɣ treated	TRUE	FALSE
MAGEA3	P43357	FVQENYLEYR	Linear	(250=259)	IFN-ɣ treated	TRUE	FALSE
MAGEA3	P43357	AEMLGSVVGNW	Linear	(133=143)	IFN-ɣ treated	TRUE	FALSE
MAGEA3	P43357	LEVFEGREDSIL	Linear	(228=239)	IFN-ɣ treated	TRUE	FALSE
MAGEA4	P43358	AEMLERVIKNY	Linear	(134=144)	Both conditions	FALSE	FALSE
MAGEA4	P43358	KEVDPASNTYTL	Linear	(168=179)	Both conditions	TRUE	FALSE
MAGEA4	P43358	AETSYVKVL	Linear	(280=288)	Both conditions	FALSE	FALSE
MAGEA4	P43358	GVYDGREHTV	Linear	(230=239)	Both conditions	FALSE	TRUE
MAGEA4	P43358	IAYPSLREAAL	Linear	(300=310)	Both conditions	TRUE	FALSE
MAGEA4	P43358	REALSNKVDEL	Linear	(107=117)	Both conditions	TRUE	FALSE
MAGEA4	P43358	YDGREHTV	Linear	(232=239)	Both conditions	FALSE	FALSE
MAGEA4	P43358	KELVTKAEML	Linear	(128=137)	Both conditions	TRUE	FALSE
MAGEA4	P43358	KVDELAHFL	Linear	(113=121)	Both conditions	FALSE	FALSE
MAGEA4	P43358	AESLFREAL	Linear	(102=110)	Both conditions	FALSE	FALSE
MAGEA4	P43358	KVLEHVVRV	Linear	(286=294)	Both conditions	FALSE	FALSE
MAGEA4	P43358	TVYGEPRKL	Linear	(238=246)	IFN-ɣ untreated	FALSE	FALSE
MAGEA4	P43358	LERVIKNY	Linear	(137=144)	Both conditions	FALSE	FALSE
MAGEA4	P43358	ALAETSYVKV	Linear	(278=287)	Both conditions	FALSE	FALSE
MAGEA4	P43358	AESLFREA	Linear	(102=109)	IFN-ɣ untreated	TRUE	FALSE
MAGEA4	P43358	LREAALLEE	Linear	(305=313)	IFN-ɣ untreated	TRUE	FALSE
MAGEA4	P43358	ALLEEEEGV	Linear	(309=317)	Both conditions	TRUE	FALSE
MAGEA4	P43358	KVDELAHFLL	Linear	(113=122)	Both conditions	TRUE	FALSE
MAGEA4	P43358	VYDGREHTV	Linear	(231=239)	Both conditions	FALSE	FALSE
MAGEA4	P43358	GTLEEVPAA	Linear	(49=57)	Both conditions	TRUE	FALSE
MAGEA4	P43358	SEEEIWEEL	Linear	(218=226)	Both conditions	TRUE	FALSE
MAGEA4	P43358	EMLERVIKNY	Linear	(135=144)	IFN-ɣ treated	TRUE	FALSE
MAGEA4	P43358	MLERVIKNY	Linear	(136=144)	IFN-ɣ treated	TRUE	FALSE
MAGEA4	P43358	GVYDGREHT	Linear	(230=238)	IFN-ɣ treated	TRUE	FALSE
MAGEA4	P43358	VLEHVVRV	Linear	(287=294)	IFN-ɣ treated	FALSE	FALSE
MAGEA4	P43358	DELAHFLLRKY	Linear	(115=125)	IFN-ɣ treated	TRUE	FALSE
MAGEA4	P43358	FLWGPRALAET	Linear	(272=282)	IFN-ɣ treated	TRUE	FALSE
MAGEA4	P43358	EEVPAAESRKY	Cis-Spliced	(52=59;123=125)	Both conditions	TRUE	FALSE
MAGEA4	P43358	GKVLEHVVRV	Cis-Spliced	(153=154;287=294)	IFN-ɣ untreated	TRUE	FALSE
MAGEA4	P43358	NKVLEHVVRV	Cis-Spliced	(112=113;287=294)	Both conditions	TRUE	FALSE
MAGEA6	P43360	KVAKLVHFL	Linear	(112=120)	Both conditions	TRUE	FALSE
MAGEA6	P43360	MEVDPIGHVY	Linear	(167=176)	Both conditions	FALSE	FALSE
MAGEA8	P43361	AEMLESVIKNY	Linear	(136=146)	Both conditions	FALSE	FALSE
MAGEA8	P43361	KEVDPAGHSY	Linear	(170=179)	Both conditions	FALSE	FALSE
MAGEA8	P43361	GLYDGREHSV	Linear	(232=241)	Both conditions	FALSE	FALSE
MAGEA8	P43361	ALDEKVAEL	Linear	(111=119)	Both conditions	TRUE	FALSE
MAGEA8	P43361	YDGREHSV	Linear	(234=241)	Both conditions	TRUE	FALSE
MAGEA8	P43361	KEVDPAGHSYIL	Linear	(170=181)	IFN-ɣ treated	TRUE	FALSE
MAGEA8	P43361	KYQIKEPVT	Linear	(126=134)	IFN-ɣ treated	TRUE	FALSE
MAGEA8	P43361	REALDEKVAEL	Linear	(109=119)	IFN-ɣ treated	TRUE	FALSE
MAGEA8	P43361	KGVLEHVVRV	Cis-Spliced	(316=317;289=296)	Both conditions	TRUE	FALSE
MAGEA8	P43361	VALEHVVRV	Cis-Spliced	(116=117;290=296)	IFN-ɣ untreated	TRUE	FALSE
MAGEA9	P43362	FMFQEALKL	Linear	(102=110)	Both conditions	FALSE	FALSE
MAGEA9	P43362	AETSYEKVINY	Linear	(278=288)	IFN-ɣ untreated	TRUE	FALSE
MAGEA9	P43362	KASEFMQVIFGT	Linear	(152=163)	IFN-ɣ untreated	TRUE	FALSE
MAGEA9	P43362	VLGEEQEGV	Linear	(307=315)	Both conditions	TRUE	FALSE
MAGEA9	P43362	GSDPAHYEF	Linear	(262=270)	IFN-ɣ treated	TRUE	FALSE
MAGEA9	P43362	AETSYEKVI	Linear	(278=286)	IFN-ɣ treated	TRUE	FALSE
MAGEA9	P43362	EALLESVLKNY	Cis-Spliced	(106=108;135=142)	Both conditions	TRUE	FALSE
MAGEB18	Q96M61	FLLQKYAPV	Cis-Spliced	(117=122;75=77)	IFN-ɣ treated	TRUE	FALSE
MAGEB2	O15479	KLLTMLKLV	Cis-Spliced	(246=249;137=141)	IFN-ɣ treated	TRUE	FALSE
MAGEB3	O15480	GEPRKLITQDL	Linear	(242=252)	IFN-ɣ untreated	TRUE	FALSE
MAGEB4	O15481	VAARRGTTAM	Linear	(321=330)	IFN-ɣ treated	TRUE	FALSE
MAGEB4	O15481	LLSKPLLSV	Cis-Spliced	(138=141;203=207)	Both conditions	TRUE	FALSE
MAGEB6	Q8N7X4	GIYDGILHSI	Linear	(315=324)	IFN-ɣ untreated	FALSE	FALSE
MAGEC2	Q9UBF1	TIDTADDATVM	Linear	(347=357)	Both conditions	FALSE	FALSE
MAGEC2	Q9UBF1	ALIEVGPDHFC	Linear	(196=206)	IFN-ɣ untreated	FALSE	FALSE
MAGEC2	Q9UBF1	FVYGEPREL	Linear	(265=273)	Both conditions	FALSE	FALSE
MAGEC2	Q9UBF1	GVYAGREHFV	Linear	(257=266)	Both conditions	FALSE	FALSE
MAGEC2	Q9UBF1	TLDEKVAEL	Linear	(140=148)	Both conditions	FALSE	FALSE
MAGEC2	Q9UBF1	TADDATVM	Linear	(350=357)	Both conditions	TRUE	FALSE
MAGEC2	Q9UBF1	ALKDVEERV	Linear	(336=344)	IFN-ɣ treated	FALSE	TRUE
MAGEC2	Q9UBF1	SEEVIWEVL	Linear	(245=253)	Both conditions	TRUE	FALSE
MAGEC2	Q9UBF1	FSTSSSLIL	Linear	(55=63)	Both conditions	TRUE	FALSE
MAGEC2	Q9UBF1	LLLGLLTKV	Cis-Spliced	(61=64;273=277)	Both conditions	TRUE	FALSE
MAGED1	Q9Y5V3	KEIDKEEHLYI	Linear	(529=539)	IFN-ɣ untreated	TRUE	FALSE
MAGED1	Q9Y5V3	KEIDKEEHLYIL	Linear	(529=540)	Both conditions	TRUE	FALSE
MAGED1	Q9Y5V3	KEIDKEEHLY	Linear	(529=538)	Both conditions	FALSE	FALSE
MAGED1	Q9Y5V3	QLKEIDKEEHL	Linear	(527=537)	Both conditions	TRUE	FALSE
MAGED1	Q9Y5V3	VEDSALLMQTL	Linear	(20=30)	Both conditions	TRUE	FALSE
MAGED1	Q9Y5V3	SEMLRDIIREY	Linear	(495=505)	IFN-ɣ untreated	FALSE	FALSE
MAGED1	Q9Y5V3	KEIDKEEHL	Linear	(529=537)	Both conditions	FALSE	FALSE
MAGED1	Q9Y5V3	KVLRFIAEV	Linear	(646=654)	Both conditions	FALSE	FALSE
MAGED1	Q9Y5V3	SADGSQAQNL	Linear	(229=238)	Both conditions	TRUE	FALSE
MAGED1	Q9Y5V3	KEEHLYILI	Linear	(533=541)	Both conditions	FALSE	FALSE
MAGED1	Q9Y5V3	LVKYLMLK	Linear	(478=485)	Both conditions	TRUE	FALSE
MAGED1	Q9Y5V3	LLMQTLMEA	Linear	(25=33)	Both conditions	TRUE	FALSE
MAGED1	Q9Y5V3	SEAVLWEAL	Linear	(578=586)	Both conditions	FALSE	FALSE
MAGED1	Q9Y5V3	AEARTRMGI	Linear	(688=696)	IFN-ɣ treated	FALSE	FALSE
MAGED2	Q9UNF1	NADPQAVTMP	Linear	(110=119)	IFN-ɣ untreated	TRUE	FALSE
MAGED2	Q9UNF1	NADPQAVTM	Linear	(110=118)	Both conditions	FALSE	FALSE
MAGED2	Q9UNF1	KEIDKNDHLY	Linear	(337=346)	Both conditions	FALSE	FALSE
MAGED2	Q9UNF1	SLFGDVKKL	Linear	(407=415)	Both conditions	FALSE	FALSE
MAGED2	Q9UNF1	KEIDKNDHLYIL	Linear	(337=348)	Both conditions	FALSE	FALSE
MAGED2	Q9UNF1	AEAKARAEI	Linear	(491=499)	Both conditions	FALSE	FALSE
MAGED2	Q9UNF1	SMMQTLLTV	Linear	(25=33)	Both conditions	FALSE	FALSE
MAGED2	Q9UNF1	YSLEKVFGI	Linear	(326=334)	Both conditions	FALSE	FALSE
MAGED2	Q9UNF1	LAAWARRAL	Linear	(234=242)	Both conditions	TRUE	FALSE
MAGED2	Q9UNF1	GLFAGLGGAGA	Linear	(582=592)	Both conditions	FALSE	FALSE
MAGED2	Q9UNF1	SEAVIWEVL	Linear	(387=395)	Both conditions	FALSE	FALSE
MAGED2	Q9UNF1	KEIDKNDHL	Linear	(337=345)	Both conditions	FALSE	FALSE
MAGED2	Q9UNF1	YETSKMKVL	Linear	(449=457)	IFN-ɣ treated	FALSE	FALSE
MAGED2	Q9UNF1	KEIDKNDHLYI	Linear	(337=347)	IFN-ɣ treated	FALSE	FALSE
MAGED2	Q9UNF1	SMMQTLLSL	Cis-Spliced	(25=29;242=245)	Both conditions	TRUE	FALSE
MAGED2	Q9UNF1	TTDPQAVTM	Cis-Spliced	(86=87;112=118)	Both conditions	TRUE	FALSE
MAGED4	Q96JG8	QAAWARLP	Cis-Spliced	(213=214;668=673)	Both conditions	TRUE	FALSE
MAGEE1	Q9HCI5	LLLNKLLSV	Cis-Spliced	(559=563;627=630)	IFN-ɣ treated	TRUE	FALSE
MAGEE1	Q9HCI5	LLMDLLNKL	Cis-Spliced	(757=760;560=564)	IFN-ɣ treated	TRUE	FALSE
MAGEF1	Q9HAY2	FGYPKRLIM	Linear	(207=215)	IFN-ɣ untreated	FALSE	FALSE
MAGEF1	Q9HAY2	ILFPDIIARA	Linear	(112=121)	Both conditions	FALSE	FALSE
MAGEF1	Q9HAY2	FLFGYPKRL	Linear	(205=213)	Both conditions	FALSE	FALSE
MAGEF1	Q9HAY2	REAQVWEML	Linear	(185=193)	IFN-ɣ untreated	FALSE	FALSE
MAGEF1	Q9HAY2	REEGAAEPAL	Linear	(45=54)	Both conditions	TRUE	FALSE
MAGEF1	Q9HAY2	LEISKMEVL	Linear	(247=255)	IFN-ɣ treated	FALSE	FALSE
MAGEL2	Q9UJ55	LGYHTGNLV	Linear	(1093=1101)	IFN-ɣ untreated	TRUE	FALSE
MAT2A	P31153	YLDEDTIYHL	Linear	(235=244)	Both conditions	FALSE	FALSE
MAT2A	P31153	RELLEIVKKNF	Linear	(343=353)	Both conditions	FALSE	FALSE
MAT2A	P31153	ALKEKVIKA	Linear	(221=229)	Both conditions	FALSE	FALSE
MAT2A	P31153	GQLNGFHEA	Linear	(3=11)	Both conditions	FALSE	FALSE
MAT2A	P31153	KLNAKLAEL	Linear	(159=167)	IFN-ɣ untreated	FALSE	FALSE
MAT2A	P31153	HEAFIEEGTFL	Linear	(9=19)	IFN-ɣ treated	TRUE	FALSE
MAT2A	P31153	VIKAVVPAK	Linear	(226=234)	IFN-ɣ treated	TRUE	FALSE
MDM2	Q00987	GEISEKAKL	Linear	(339=347)	Both conditions	FALSE	FALSE
MDM2	Q00987	KEESVESSL	Linear	(422=430)	Both conditions	FALSE	FALSE
MDM2	Q00987	FEEDPEISL	Linear	(291=299)	Both conditions	FALSE	FALSE
MDM2	Q00987	VSDQFSVEF	Linear	(241=249)	IFN-ɣ treated	TRUE	FALSE
MDM2	Q00987	QEEKPSSSHL	Linear	(143=152)	IFN-ɣ treated	FALSE	FALSE
MDM2	Q00987	LLGDLFGV	Linear	(81=88)	IFN-ɣ treated	FALSE	FALSE
MDM2	Q00987	AVTDKLTQA	Cis-Spliced	(13=15;380=385)	Both conditions	TRUE	FALSE
MDM2	Q00987	QGLSEKAKL	Cis-Spliced	(442=443;341=347)	IFN-ɣ untreated	TRUE	FALSE
MELTF	P08582	FGDDHNKNGF	Linear	(649=658)	Both conditions	FALSE	FALSE
MELTF	P08582	SEAYGQKDLL	Linear	(315=324)	Both conditions	FALSE	FALSE
MELTF	P08582	REAGIQPSLL	Linear	(44=53)	Both conditions	FALSE	FALSE
MELTF	P08582	FSHEGSSF	Linear	(303=310)	Both conditions	FALSE	FALSE
MELTF	P08582	AEQVDAVTL	Linear	(412=420)	Both conditions	FALSE	FALSE
MELTF	P08582	RADTDGGLIF	Linear	(284=293)	IFN-ɣ untreated	TRUE	FALSE
MELTF	P08582	RDSSHAFTL	Linear	(459=467)	Both conditions	TRUE	FALSE
MELTF	P08582	SELVPIATQTY	Linear	(330=340)	Both conditions	FALSE	FALSE
MELTF	P08582	YEAWLGHEYL	Linear	(340=349)	IFN-ɣ treated	FALSE	FALSE
MELTF	P08582	REAGIQPSL	Linear	(44=52)	Both conditions	FALSE	FALSE
MELTF	P08582	LLSLLLPAL	Cis-Spliced	(248=250;724=729)	IFN-ɣ treated	TRUE	FALSE
MELTF	P08582	SADAARLL	Cis-Spliced	(59=61;730=734)	IFN-ɣ treated	TRUE	FALSE
MELTF	P08582	VTLLLLPAL	Cis-Spliced	(418=420;724=729)	IFN-ɣ treated	TRUE	FALSE
MET	P08581	FIGEHYVHV	Linear	(1344=1352)	Both conditions	FALSE	FALSE
MET	P08581	SEMNVNMKY	Linear	(33=41)	Both conditions	FALSE	FALSE
MET	P08581	ILHEHHIFL	Linear	(56=64)	Both conditions	FALSE	FALSE
MET	P08581	YVLNEEDLQKV	Linear	(71=81)	Both conditions	FALSE	FALSE
MET	P08581	ITDIGEVSQFL	Linear	(1115=1125)	Both conditions	TRUE	FALSE
MET	P08581	ITDIGEVSQF	Linear	(1115=1124)	Both conditions	TRUE	FALSE
MET	P08581	FSHPNVLSL	Linear	(1134=1142)	Both conditions	TRUE	FALSE
MET	P08581	TEGIIMKDF	Linear	(1126=1134)	Both conditions	FALSE	FALSE
MET	P08581	REDPIVYEI	Linear	(739=747)	Both conditions	FALSE	FALSE
MET	P08581	SEGSPLVVL	Linear	(1149=1157)	Both conditions	FALSE	FALSE
MET	P08581	LNPELVQAVQH	Linear	(1058=1068)	IFN-ɣ untreated	TRUE	FALSE
MET	P08581	GLIAGVVSI	Linear	(933=941)	Both conditions	FALSE	FALSE
MET	P08581	FMGQFSEVLL	Linear	(430=439)	Both conditions	TRUE	FALSE
MET	P08581	TLLDNDGKKIHC	Linear	(1096=1107)	IFN-ɣ treated	TRUE	FALSE
MET	P08581	YVDPVITSI	Linear	(654=662)	Both conditions	FALSE	FALSE
MET	P08581	AETPIQNVIL	Linear	(48=57)	Both conditions	TRUE	FALSE
MET	P08581	ALNPELVQA	Linear	(1057=1065)	IFN-ɣ treated	FALSE	FALSE
MET	P08581	IKDLGSEL	Linear	(961=968)	IFN-ɣ treated	TRUE	FALSE
MET	P08581	KPFEKPVM	Linear	(842=849)	IFN-ɣ treated	TRUE	FALSE
MET	P08581	AEYKTGPVL	Linear	(82=90)	IFN-ɣ treated	TRUE	FALSE
MET	P08581	HVNATYVNV	Linear	(1351=1359)	Both conditions	TRUE	FALSE
MET	P08581	LESLQTQKF	Linear	(1252=1260)	IFN-ɣ treated	FALSE	FALSE
MET	P08581	IGEHYVHV	Linear	(1345=1352)	IFN-ɣ treated	TRUE	FALSE
MET	P08581	SLIVHFNEV	Linear	(1075=1083)	IFN-ɣ treated	TRUE	FALSE
MET	P08581	TLLTLTGNYL	Linear	(673=682)	IFN-ɣ treated	FALSE	FALSE
MET	P08581	TVGPAMNK	Linear	(625=632)	IFN-ɣ treated	TRUE	FALSE
MET	P08581	HISIGGKTCTL	Linear	(689=699)	IFN-ɣ treated	TRUE	FALSE
MET	P08581	HEAGRNFTVA	Linear	(780=789)	IFN-ɣ treated	TRUE	FALSE
MET	P08581	KAFFMLDGILS	Linear	(818=828)	IFN-ɣ treated	TRUE	FALSE
MET	P08581	TEGIIMKD	Linear	(1126=1133)	IFN-ɣ treated	TRUE	FALSE
MET	P08581	KAFFMLDGIL	Linear	(818=827)	IFN-ɣ treated	TRUE	FALSE
MET	P08581	STITGVGK	Linear	(758=765)	IFN-ɣ treated	FALSE	FALSE
MET	P08581	TITGVGKNLN	Linear	(759=768)	IFN-ɣ treated	TRUE	FALSE
MET	P08581	LSLGLAPGL	Cis-Spliced	(690=693;7=11)	Both conditions	TRUE	FALSE
MET	P08581	MSLDEKFTV	Cis-Spliced	(1031=1032;1212=1218)	IFN-ɣ treated	TRUE	FALSE
MET	P08581	VLLGKVFP	Cis-Spliced	(603=606;567=570)	Both conditions	TRUE	FALSE
MMADHC	F8WEC0	EEVEIEREVL	Linear	(191=200)	Both conditions	FALSE	FALSE
MMADHC	F8WEC0	VANGKLMIL	Linear	(168=176)	Both conditions	FALSE	FALSE
MMADHC	F8WEC0	SEEVEIEREVL	Linear	(190=200)	Both conditions	TRUE	FALSE
MMADHC	F8WEC0	SLWGTHVVV	Linear	(302=310)	IFN-ɣ treated	FALSE	FALSE
MMADHC	F8WEC0	AEPLSSERHEF	Linear	(104=114)	IFN-ɣ treated	TRUE	FALSE
MT-CO2	P00403	RLLDVDNRVVL	Linear	(134=144)	Both conditions	FALSE	FALSE
MT-CO2	P00403	KIFEMGPVFTL	Linear	(217=227)	Both conditions	FALSE	FALSE
MT-CO2	P00403	FLEPGDLRLL	Linear	(127=136)	Both conditions	FALSE	FALSE
MT-CO2	P00403	FEMGPVFTL	Linear	(219=227)	Both conditions	FALSE	FALSE
MT-CO2	P00403	IALPSLRIL	Linear	(76=84)	Both conditions	FALSE	FALSE
MT-CO2	P00403	SEICGANHSF	Linear	(197=206)	Both conditions	FALSE	FALSE
MT-CO2	P00403	RLNQTTFTA	Linear	(178=186)	Both conditions	FALSE	FALSE
MT-CO2	P00403	METVWTILPA	Linear	(61=70)	IFN-ɣ untreated	TRUE	FALSE
MT-CO2	P00403	TILPAIILV	Linear	(66=74)	IFN-ɣ untreated	TRUE	FALSE
MT-CO2	P00403	EMGPVFTL	Linear	(220=227)	IFN-ɣ treated	FALSE	FALSE
MT-CO2	P00403	YEYTDYGGL	Linear	(108=116)	IFN-ɣ treated	TRUE	FALSE
MT-CO2	P00403	PAIILVLIA	Linear	(69=77)	IFN-ɣ treated	TRUE	FALSE
MT-CO2	P00403	RLLDVDNRV	Linear	(134=142)	IFN-ɣ treated	FALSE	FALSE
MT-CO2	P00403	LTNLPLKL	Cis-Spliced	(50=52;214=218)	Both conditions	TRUE	FALSE
MTF1	Q14872	EEMGLTSSF	Linear	(743=751)	IFN-ɣ treated	FALSE	FALSE
MTF1	Q14872	LSEPPQPL	Linear	(427=434)	IFN-ɣ treated	TRUE	FALSE
MTF1	Q14872	LLQPKVEKV	Cis-Spliced	(464=467;594=598)	Both conditions	TRUE	FALSE
MTF1	Q14872	VGSKVEKV	Cis-Spliced	(75=76;593=598)	Both conditions	TRUE	FALSE
MTF2	Q9Y483	RVPPVPPNV	Linear	(349=357)	IFN-ɣ treated	FALSE	FALSE
MTF2	Q9Y483	HLFGLRIRV	Linear	(342=350)	IFN-ɣ treated	TRUE	FALSE
MTF2	Q9Y483	AEKEPEGTSHEF	Linear	(361=372)	IFN-ɣ treated	FALSE	FALSE
MYL6	J3KND3	TVMGAEIRHVLV	Linear	(104=115)	IFN-ɣ untreated	FALSE	FALSE
MYL6	J3KND3	KVLDFEHFL	Linear	(64=72)	Both conditions	FALSE	FALSE
MYL6	J3KND3	AEFKEAFQLF	Linear	(11=20)	Both conditions	FALSE	FALSE
MYL6	J3KND3	YEAFVRHIL	Linear	(142=150)	Both conditions	FALSE	FALSE
MYL6	J3KND3	AEFKEAFQL	Linear	(11=19)	Both conditions	FALSE	FALSE
MYL6	J3KND3	KSDEMNVKV	Linear	(57=65)	IFN-ɣ untreated	FALSE	FALSE
MYL6	J3KND3	AEFKEAFQ	Linear	(11=18)	IFN-ɣ untreated	FALSE	FALSE
MYL6	J3KND3	FTEDQTAEF	Linear	(5=13)	Both conditions	FALSE	FALSE
MYL6	J3KND3	AEIRHVLVTL	Linear	(108=117)	Both conditions	FALSE	FALSE
MYL6	J3KND3	VTLGEKMTEEE	Linear	(115=125)	IFN-ɣ treated	FALSE	FALSE
MYL6	J3KND3	FVRHILSG	Linear	(145=152)	IFN-ɣ treated	FALSE	FALSE
MYL6	J3KND3	RTGDGKIL	Linear	(22=29)	IFN-ɣ treated	TRUE	FALSE
MYL6	J3KND3	QTVAKNKDQ	Linear	(76=84)	IFN-ɣ treated	TRUE	FALSE
MYL6	J3KND3	GEKMTEEEVEML	Linear	(118=129)	IFN-ɣ treated	FALSE	FALSE
MYL6	J3KND3	AEFKEAFRAL	Cis-Spliced	(11=17;38=40)	IFN-ɣ untreated	TRUE	FALSE
MYL6	J3KND3	RELRHVLVTL	Cis-Spliced	(95;109=117)	Both conditions	TRUE	FALSE
MYO1C	F5H6E2	ILQSKEPAYV	Linear	(590=599)	Both conditions	FALSE	FALSE
MYO1C	F5H6E2	GSDGVRVTM	Linear	(4=12)	Both conditions	FALSE	FALSE
MYO1C	F5H6E2	LLSIVASVLHL	Linear	(280=290)	IFN-ɣ untreated	TRUE	FALSE
MYO1C	F5H6E2	VEEKFKGIISI	Linear	(459=469)	IFN-ɣ untreated	TRUE	FALSE
MYO1C	F5H6E2	FLDKNNDLL	Linear	(534=542)	Both conditions	FALSE	FALSE
MYO1C	F5H6E2	VADTVYRAL	Linear	(95=103)	Both conditions	FALSE	FALSE
MYO1C	F5H6E2	AVADTVYRA	Linear	(94=102)	Both conditions	FALSE	FALSE
MYO1C	F5H6E2	ALREASELL	Linear	(815=823)	Both conditions	FALSE	FALSE
MYO1C	F5H6E2	YLLEKSRVV	Linear	(196=204)	Both conditions	FALSE	FALSE
MYO1C	F5H6E2	IETLTKTAL	Linear	(976=984)	Both conditions	TRUE	FALSE
MYO1C	F5H6E2	HLAVVAPRL	Linear	(1028=1036)	Both conditions	FALSE	FALSE
MYO1C	F5H6E2	RLLQSNPVL	Linear	(149=157)	Both conditions	FALSE	FALSE
MYO1C	F5H6E2	FAVADTVYRAL	Linear	(93=103)	IFN-ɣ untreated	FALSE	FALSE
MYO1C	F5H6E2	REASELLREL	Linear	(817=826)	Both conditions	TRUE	FALSE
MYO1C	F5H6E2	FLDHVRTSF	Linear	(784=792)	Both conditions	FALSE	FALSE
MYO1C	F5H6E2	YIGPVLVSV	Linear	(55=63)	Both conditions	FALSE	FALSE
MYO1C	F5H6E2	CAKVSSINDKS	Linear	(248=258)	IFN-ɣ untreated	TRUE	FALSE
MYO1C	F5H6E2	FLDKNNDLLF	Linear	(534=543)	Both conditions	FALSE	FALSE
MYO1C	F5H6E2	KLQQLFIEL	Linear	(420=428)	Both conditions	FALSE	FALSE
MYO1C	F5H6E2	SLATKIQAA	Linear	(712=720)	Both conditions	FALSE	FALSE
MYO1C	F5H6E2	TIDFTPGSEL	Linear	(1010=1019)	Both conditions	FALSE	FALSE
MYO1C	F5H6E2	SEAAFIENL	Linear	(35=43)	Both conditions	FALSE	FALSE
MYO1C	F5H6E2	YTYIGPVL	Linear	(53=60)	Both conditions	TRUE	FALSE
MYO1C	F5H6E2	SLSDSLFVL	Linear	(947=955)	Both conditions	FALSE	FALSE
MYO1C	F5H6E2	ICDLVEEKF	Linear	(455=463)	IFN-ɣ treated	TRUE	FALSE
MYO1C	F5H6E2	RELCIKNMVW	Linear	(824=833)	IFN-ɣ treated	TRUE	FALSE
MYO1C	F5H6E2	RENLIYTYI	Linear	(48=56)	IFN-ɣ treated	TRUE	FALSE
MYO1C	F5H6E2	GEATDLTFL	Linear	(478=486)	IFN-ɣ treated	TRUE	FALSE
MYO1C	F5H6E2	GLLDIYGFEV	Linear	(394=403)	IFN-ɣ treated	FALSE	FALSE
MYO1C	F5H6E2	RNDNSSRF	Linear	(167=174)	IFN-ɣ treated	TRUE	FALSE
MYO1C	F5H6E2	YLGLLENLRV	Linear	(624=633)	Both conditions	FALSE	FALSE
MYO1C	F5H6E2	CNELLEKSRVV	Cis-Spliced	(417=419;197=204)	Both conditions	TRUE	FALSE
MYO1C	F5H6E2	YLLEKVRVT	Cis-Spliced	(196=200;8=11)	Both conditions	TRUE	FALSE
NCOA1	Q15788	RMDGAVTSV	Linear	(835=843)	IFN-ɣ untreated	FALSE	FALSE
NCOA1	Q15788	AELDRALGIDKL	Linear	(949=960)	IFN-ɣ treated	TRUE	FALSE
NCOA1	Q15788	LEALLLEQL	Cis-Spliced	(873=876;932=936)	Both conditions	TRUE	FALSE
NCOA1	Q15788	LLLEALEQL	Cis-Spliced	(115=119;933=936)	IFN-ɣ treated	TRUE	FALSE
NDC80	O14777	HLEEQIAKV	Linear	(599=607)	Both conditions	FALSE	FALSE
NDC80	O14777	REKEPNRLESL	Linear	(286=296)	Both conditions	FALSE	FALSE
NDC80	O14777	ALNEQIARL	Linear	(274=282)	Both conditions	FALSE	FALSE
NDC80	O14777	GLNEEIARV	Linear	(330=338)	Both conditions	FALSE	FALSE
NDC80	O14777	NELDAVQREY	Linear	(555=564)	Both conditions	FALSE	FALSE
NDC80	O14777	TEEEINKAL	Linear	(468=476)	IFN-ɣ untreated	FALSE	FALSE
NDC80	O14777	DEMNAELQSKL	Linear	(244=254)	IFN-ɣ untreated	TRUE	FALSE
NDC80	O14777	KHKHLLEST	Linear	(537=545)	IFN-ɣ treated	TRUE	FALSE
NDC80	O14777	AELQSKLKNLL	Cis-Spliced	(248=255;354=356)	Both conditions	TRUE	FALSE
NISCH	Q9Y2I1	FLLEHIRILKV	Linear	(700=710)	Both conditions	TRUE	FALSE
NISCH	Q9Y2I1	FLLEHIRIL	Linear	(700=708)	Both conditions	FALSE	FALSE
NISCH	Q9Y2I1	GLFDQHFRL	Linear	(1238=1246)	Both conditions	FALSE	FALSE
NISCH	Q9Y2I1	FADGHVLEL	Linear	(966=974)	Both conditions	FALSE	FALSE
NISCH	Q9Y2I1	FLHFHFYEI	Linear	(114=122)	Both conditions	TRUE	FALSE
NISCH	Q9Y2I1	FLQHLMVVL	Linear	(1268=1276)	Both conditions	FALSE	FALSE
NISCH	Q9Y2I1	FADGHVLELL	Linear	(966=975)	Both conditions	FALSE	FALSE
NISCH	Q9Y2I1	SIFKSLHQV	Linear	(214=222)	IFN-ɣ untreated	FALSE	FALSE
NISCH	Q9Y2I1	ISDAANLHEF	Linear	(794=803)	IFN-ɣ untreated	FALSE	FALSE
NISCH	Q9Y2I1	EIDESVKL	Linear	(301=308)	Both conditions	TRUE	FALSE
NISCH	Q9Y2I1	AEPEKAPAL	Linear	(1337=1345)	Both conditions	FALSE	FALSE
NISCH	Q9Y2I1	VLWCFLIHV	Linear	(710=718)	IFN-ɣ untreated	TRUE	FALSE
NISCH	Q9Y2I1	AESREKLISL	Linear	(1476=1485)	Both conditions	TRUE	FALSE
NISCH	Q9Y2I1	REKDLEVYL	Linear	(88=96)	Both conditions	FALSE	FALSE
NISCH	Q9Y2I1	EEERLALEW	Linear	(684=692)	Both conditions	TRUE	FALSE
NISCH	Q9Y2I1	KLLAAFPG	Linear	(98=105)	IFN-ɣ untreated	TRUE	FALSE
NISCH	Q9Y2I1	SEIDESVKL	Linear	(300=308)	IFN-ɣ untreated	FALSE	FALSE
NISCH	Q9Y2I1	KLSDLQSVNV	Linear	(1228=1237)	Both conditions	FALSE	FALSE
NISCH	Q9Y2I1	ILSNQGIMFV	Linear	(505=514)	IFN-ɣ untreated	TRUE	FALSE
NISCH	Q9Y2I1	HILDFTCRL	Linear	(179=187)	IFN-ɣ treated	TRUE	FALSE
NISCH	Q9Y2I1	LARQWEAL	Linear	(1486=1493)	IFN-ɣ treated	TRUE	FALSE
NISCH	Q9Y2I1	KELDTVEVL	Linear	(445=453)	Both conditions	TRUE	FALSE
NISCH	Q9Y2I1	LLYVQAFQV	Linear	(1348=1356)	IFN-ɣ treated	TRUE	FALSE
NISCH	Q9Y2I1	LSRVPLSTV	Linear	(943=951)	IFN-ɣ treated	TRUE	FALSE
NISCH	Q9Y2I1	LLTSSEIFL	Linear	(1374=1382)	IFN-ɣ treated	TRUE	FALSE
NISCH	Q9Y2I1	ALAPAPTPV	Cis-Spliced	(1050=1055;1090=1092)	IFN-ɣ untreated	TRUE	FALSE
NISCH	Q9Y2I1	ALAPAPVEV	Cis-Spliced	(1050=1055;450=452)	Both conditions	FALSE	FALSE
NISCH	Q9Y2I1	ALAPAPVQV	Cis-Spliced	(1050=1055;576=578)	IFN-ɣ treated	TRUE	FALSE
NISCH	Q9Y2I1	ALASHLLQA	Cis-Spliced	(518=521;1110=1114)	IFN-ɣ treated	TRUE	FALSE
NISCH	Q9Y2I1	ALFVRLAL	Cis-Spliced	(983=986;687=690)	IFN-ɣ treated	TRUE	FALSE
NISCH	Q9Y2I1	FSAYQTPGL	Cis-Spliced	(249=251;1169=1174)	Both conditions	TRUE	FALSE
NISCH	Q9Y2I1	LARVGSEL	Cis-Spliced	(1486=1488;22=26)	Both conditions	TRUE	FALSE
NISCH	Q9Y2I1	LSNEEERL	Cis-Spliced	(506=508;684=688)	Both conditions	TRUE	FALSE
NISCH	Q9Y2I1	LTAALAVHL	Cis-Spliced	(125=130;335=337)	Both conditions	TRUE	FALSE
PAGE2	Q7Z2X7	IMPTFDLTKV	Linear	(94=103)	Both conditions	TRUE	FALSE
PAGE2	Q7Z2X7	TKVLEAGDAQP	Linear	(101=111)	IFN-ɣ treated	FALSE	FALSE
PAGE2	Q7Z2X7	MEAFQQELALL	Linear	(68=78)	Both conditions	TRUE	FALSE
PAGE2	Q7Z2X7	MEAFQQELAL	Linear	(68=77)	IFN-ɣ treated	TRUE	FALSE
PAGE5	Q96GU1	TLPTFDPTKV	Linear	(113=122)	Both conditions	TRUE	FALSE
PGK1	P00558	ALMDEVVKA	Linear	(354=362)	Both conditions	FALSE	FALSE
PGK1	P00558	VADKIQLI	Linear	(217=224)	Both conditions	FALSE	FALSE
PGK1	P00558	LLGKDVLFL	Linear	(88=96)	Both conditions	FALSE	FALSE
PGK1	P00558	AEAVTRAKQIVW	Linear	(325=336)	IFN-ɣ treated	FALSE	FALSE
PGK1	P00558	KVLPGVDALSNI	Linear	(406=417)	IFN-ɣ treated	FALSE	FALSE
PGK1	P00558	RGCITIIGGGD	Linear	(365=375)	IFN-ɣ treated	TRUE	FALSE
PGK1	P00558	LEGKVLPGVDAL	Linear	(403=414)	IFN-ɣ treated	FALSE	FALSE
PGK1	P00558	SLLGKDVLFL	Linear	(87=96)	IFN-ɣ treated	FALSE	FALSE
PGK1	P00558	IVWNGPVGV	Linear	(334=342)	IFN-ɣ treated	FALSE	FALSE
PGK1	P00558	SLLGKDVLF	Linear	(87=95)	IFN-ɣ treated	FALSE	FALSE
PGK1	P00558	LMDEVVKA	Linear	(355=362)	IFN-ɣ treated	TRUE	FALSE
PGK1	P00558	KALMDEVVKA	Linear	(353=362)	IFN-ɣ treated	TRUE	FALSE
PGK1	P00558	ELLEGKVLPGV	Linear	(401=411)	IFN-ɣ treated	FALSE	FALSE
PGK1	P00558	FDEEGAKIVK	Linear	(258=267)	IFN-ɣ treated	FALSE	FALSE
PGK1	P00558	PERPFLAILGGA	Linear	(204=215)	IFN-ɣ treated	TRUE	FALSE
PGK1	P00558	ILLENLRF	Linear	(117=124)	IFN-ɣ treated	TRUE	FALSE
PGK1	P00558	ILLENLRFHV	Linear	(117=126)	IFN-ɣ treated	FALSE	FALSE
PGK1	P00558	FLMKKELNYFA	Linear	(188=198)	IFN-ɣ treated	FALSE	FALSE
PGK1	P00558	YSLEPVAVELK	Linear	(76=86)	IFN-ɣ treated	FALSE	FALSE
PGK1	P00558	ALMDEVSKA	Cis-Spliced	(354=359;271=273)	IFN-ɣ treated	TRUE	FALSE
PLIN2	Q99541	AEHIESRTL	Linear	(303=311)	Both conditions	FALSE	FALSE
PLIN2	Q99541	TLLSNIQGV	Linear	(327=335)	Both conditions	FALSE	FALSE
PLIN2	Q99541	SVASTITGV	Linear	(129=137)	Both conditions	FALSE	TRUE
PLIN2	Q99541	VMAGDIYSV	Linear	(348=356)	Both conditions	FALSE	FALSE
PLIN2	Q99541	AVDPQPSVV	Linear	(5=13)	Both conditions	FALSE	FALSE
PLIN2	Q99541	GVMAGDIYSV	Linear	(347=356)	Both conditions	FALSE	FALSE
PLIN2	Q99541	IQDAQDKLYL	Linear	(274=283)	IFN-ɣ treated	FALSE	FALSE
PLIN2	Q99541	KRSIGYDDTDE	Linear	(289=299)	IFN-ɣ treated	TRUE	FALSE
PMEL	P40967	LSSEKVPV	Cis-Spliced	(528=530;377=381)	Both conditions	TRUE	FALSE
POTEE	Q6S8J3	MEKIWHHTF	Linear	(782=790)	Both conditions	FALSE	FALSE
POTEE	Q6S8J3	WISKQEYDESGP	Linear	(1056=1067)	IFN-ɣ untreated	TRUE	FALSE
POTEE	Q6S8J3	AGDDAPRAVF	Linear	(722=731)	Both conditions	FALSE	FALSE
POTEE	Q6S8J3	SLSTFQQMW	Linear	(1048=1056)	Both conditions	FALSE	FALSE
POTEE	Q6S8J3	REIVRDIKEKL	Linear	(906=916)	Both conditions	FALSE	FALSE
POTEE	Q6S8J3	SSLEKSYEL	Linear	(934=942)	Both conditions	FALSE	FALSE
POTEE	Q6S8J3	QEYDESGPSI	Linear	(1060=1069)	Both conditions	TRUE	FALSE
POTEE	Q6S8J3	SGDGVTHTV	Linear	(855=863)	Both conditions	FALSE	FALSE
POTEE	Q6S8J3	AQSKRGILTL	Linear	(758=767)	Both conditions	FALSE	FALSE
POTEE	Q6S8J3	SIVHRKCF	Linear	(1068=1075)	IFN-ɣ untreated	TRUE	FALSE
POTEE	Q6S8J3	AGDDAPRAV	Linear	(722=730)	Both conditions	FALSE	FALSE
POTEE	Q6S8J3	QEMATAASSSSL	Linear	(925=936)	Both conditions	TRUE	FALSE
POTEE	Q6S8J3	ISKQEYDESGP	Linear	(1057=1067)	IFN-ɣ untreated	TRUE	FALSE
POTEE	Q6S8J3	GIHETTFNSIM	Linear	(973=983)	Both conditions	FALSE	FALSE
POTEE	Q6S8J3	REKMTQIMFETF	Linear	(816=827)	Both conditions	FALSE	FALSE
POTEE	Q6S8J3	KEKLCYVAL	Linear	(913=921)	Both conditions	FALSE	FALSE
POTEE	Q6S8J3	YELPDGQVI	Linear	(940=948)	Both conditions	FALSE	FALSE
POTEE	Q6S8J3	MEKIWHHTFY	Linear	(782=791)	Both conditions	TRUE	FALSE
POTEE	Q6S8J3	HETTFNSIM	Linear	(975=983)	Both conditions	FALSE	FALSE
POTEE	Q6S8J3	FAGDDAPRA	Linear	(721=729)	Both conditions	FALSE	FALSE
POTEE	Q6S8J3	VALDFEQEM	Linear	(919=927)	Both conditions	FALSE	FALSE
POTEE	Q6S8J3	RVAPEEHP	Linear	(795=802)	Both conditions	FALSE	FALSE
POTEE	Q6S8J3	ATAASSSSLEKS	Linear	(928=939)	Both conditions	FALSE	FALSE
POTEE	Q6S8J3	ALDFEQEM	Linear	(920=927)	Both conditions	FALSE	FALSE
POTEE	Q6S8J3	ILASLSTFQQ	Linear	(1045=1054)	IFN-ɣ untreated	TRUE	FALSE
POTEE	Q6S8J3	AGFAGDDAPR	Linear	(719=728)	Both conditions	FALSE	FALSE
POTEE	Q6S8J3	KKANLNALD	Linear	(294=302)	IFN-ɣ untreated	TRUE	FALSE
POTEE	Q6S8J3	DSGDGVTHTV	Linear	(854=863)	IFN-ɣ untreated	FALSE	FALSE
POTEE	Q6S8J3	AMYVAIQAV	Linear	(831=839)	IFN-ɣ untreated	FALSE	FALSE
POTEE	Q6S8J3	IWHHTFYNELR	Linear	(785=795)	IFN-ɣ untreated	FALSE	FALSE
POTEE	Q6S8J3	AVFPSIVGR	Linear	(729=737)	Both conditions	FALSE	FALSE
POTEE	Q6S8J3	GDDAPRAV	Linear	(723=730)	IFN-ɣ untreated	FALSE	FALSE
POTEE	Q6S8J3	ILASLSTFQQM	Linear	(1045=1055)	Both conditions	TRUE	FALSE
POTEE	Q6S8J3	EKIWHHTFYNEL	Linear	(783=794)	IFN-ɣ treated	FALSE	FALSE
POTEE	Q6S8J3	ESGPSIVHRKCF	Linear	(1064=1075)	IFN-ɣ treated	FALSE	FALSE
POTEE	Q6S8J3	ESCGIHETTF	Linear	(970=979)	IFN-ɣ treated	FALSE	FALSE
POTEE	Q6S8J3	LGMESCGIHETT	Linear	(967=978)	IFN-ɣ treated	TRUE	FALSE
POTEE	Q6S8J3	GIHETTFNSIMK	Linear	(973=984)	IFN-ɣ treated	FALSE	FALSE
POTEE	Q6S8J3	MESCGIHETTF	Linear	(969=979)	IFN-ɣ treated	TRUE	FALSE
POTEE	Q6S8J3	REKMTQIMF	Linear	(816=824)	IFN-ɣ treated	FALSE	FALSE
POTEE	Q6S8J3	ISKQEYDESGPS	Linear	(1057=1068)	IFN-ɣ treated	FALSE	FALSE
POTEE	Q6S8J3	MESCGIHETT	Linear	(969=978)	IFN-ɣ treated	TRUE	FALSE
POTEE	Q6S8J3	RTPESQQFPDT	Linear	(576=586)	IFN-ɣ treated	TRUE	FALSE
POTEE	Q6S8J3	KDLIVMLR	Linear	(155=162)	IFN-ɣ treated	TRUE	FALSE
POTEE	Q6S8J3	QEYDESGPSIVH	Linear	(1060=1071)	IFN-ɣ treated	FALSE	FALSE
POTEE	Q6S8J3	VMDSGDGVTHTV	Linear	(852=863)	Both conditions	FALSE	FALSE
POTEE	Q6S8J3	SSSSLEKSY	Linear	(932=940)	IFN-ɣ treated	FALSE	FALSE
POTEE	Q6S8J3	IMFETFNTPAM	Linear	(822=832)	IFN-ɣ treated	FALSE	FALSE
POTEE	Q6S8J3	IMFETFNTPA	Linear	(822=831)	IFN-ɣ treated	TRUE	FALSE
POTEE	Q6S8J3	ALDFEQEMA	Linear	(920=928)	IFN-ɣ treated	FALSE	FALSE
POTEE	Q6S8J3	ALDFEQEMATA	Linear	(920=930)	IFN-ɣ treated	TRUE	FALSE
POTEE	Q6S8J3	KKANLNAL	Linear	(294=301)	IFN-ɣ treated	TRUE	FALSE
POTEE	Q6S8J3	KSYELPDGQVI	Linear	(938=948)	IFN-ɣ treated	FALSE	FALSE
POTEE	Q6S8J3	DESGPSIVHRK	Linear	(1063=1073)	IFN-ɣ treated	FALSE	FALSE
POTEE	Q6S8J3	DSGDGVTHTVP	Linear	(854=864)	IFN-ɣ treated	FALSE	FALSE
POTEE	Q6S8J3	GIHETTFNSI	Linear	(973=982)	IFN-ɣ treated	FALSE	FALSE
POTEE	Q6S8J3	VIDNGSGM	Linear	(709=716)	IFN-ɣ treated	FALSE	FALSE
POTEE	Q6S8J3	ILLTEAPLN	Linear	(803=811)	IFN-ɣ treated	TRUE	FALSE
POTEE	Q6S8J3	AALAALHL	Cis-Spliced	(1018=1021;176=179)	Both conditions	TRUE	FALSE
POTEE	Q6S8J3	AGNGDVKL	Cis-Spliced	(439=443;189=191)	IFN-ɣ treated	TRUE	FALSE
POTEE	Q6S8J3	FLLHPLLL	Cis-Spliced	(290=292;801=805)	Both conditions	TRUE	FALSE
POTEE	Q6S8J3	KLWHHTFRV	Cis-Spliced	(784=790;795=796)	Both conditions	TRUE	FALSE
POTEE	Q6S8J3	KLWHHTFVR	Cis-Spliced	(784=790;909=910)	IFN-ɣ treated	TRUE	FALSE
POTEE	Q6S8J3	LAALAALHL	Cis-Spliced	(1017=1021;176=179)	IFN-ɣ untreated	TRUE	FALSE
POTEE	Q6S8J3	WCSLVHRKC	Cis-Spliced	(101=102;1068=1074)	IFN-ɣ treated	TRUE	FALSE
POTEE	Q6S8J3	YLMKLLTEV	Cis-Spliced	(888=894;625=626)	Both conditions	TRUE	FALSE
POTEE	Q6S8J3	YLMKLLTQV	Cis-Spliced	(888=894;946=947)	IFN-ɣ untreated	TRUE	FALSE
PSMB9	A2ACR1	GEAVVNRVFDKL	Linear	(20=31)	Both conditions	TRUE	FALSE
PSMB9	A2ACR1	GEAVVNRVF	Linear	(20=28)	Both conditions	FALSE	FALSE
PSMB9	A2ACR1	REDLSAHL	Linear	(88=95)	Both conditions	TRUE	FALSE
PSMB9	A2ACR1	GVDHRVIL	Linear	(179=186)	Both conditions	TRUE	FALSE
PSMB9	A2ACR1	VADMAAYQL	Linear	(52=60)	Both conditions	FALSE	FALSE
PSMB9	A2ACR1	IELEEPPLVL	Linear	(65=74)	Both conditions	FALSE	FALSE
PSMB9	A2ACR1	FAIGGSGSTF	Linear	(121=130)	Both conditions	FALSE	FALSE
PSMB9	A2ACR1	YQLELHGIEL	Linear	(58=67)	IFN-ɣ treated	TRUE	FALSE
PSMB9	A2ACR1	AGVDHRVIL	Linear	(178=186)	IFN-ɣ treated	TRUE	FALSE
PSMB9	A2ACR1	REDLSAHLM	Linear	(88=96)	IFN-ɣ treated	TRUE	FALSE
PSMB9	A2ACR1	VEFDGGVVM	Linear	(3=11)	IFN-ɣ treated	FALSE	FALSE
PSMB9	A2ACR1	FTTDAIAL	Linear	(151=158)	IFN-ɣ treated	TRUE	FALSE
PSMB9	A2ACR1	AVVNRVFDKL	Linear	(22=31)	IFN-ɣ treated	TRUE	FALSE
PSMB9	A2ACR1	FALGGSAHL	Cis-Spliced	(121=125;92=95)	IFN-ɣ treated	TRUE	FALSE
RABAC1	M0R3D4	HQIEAVDGEEL	Linear	(136=146)	Both conditions	FALSE	FALSE
RABAC1	M0R3D4	AEAEGLSGTTL	Linear	(11=21)	Both conditions	FALSE	FALSE
RABAC1	M0R3D4	IEAVDGEEL	Linear	(138=146)	Both conditions	TRUE	FALSE
RABAC1	M0R3D4	AEAEGLSGTTLL	Linear	(11=22)	Both conditions	FALSE	FALSE
RNF213	Q63HN8	SEPEEESERHIL	Linear	(1258=1269)	Both conditions	FALSE	FALSE
RNF213	Q63HN8	SLMEARWNHEL	Linear	(3841=3851)	Both conditions	TRUE	FALSE
RNF213	Q63HN8	KVSEEAKSILL	Linear	(3249=3259)	Both conditions	FALSE	FALSE
RNF213	Q63HN8	RVMEELPLMLL	Linear	(1759=1769)	Both conditions	FALSE	FALSE
RNF213	Q63HN8	DINGKMWL	Linear	(2081=2088)	Both conditions	FALSE	FALSE
RNF213	Q63HN8	LLGDMEWRL	Linear	(957=965)	Both conditions	FALSE	FALSE
RNF213	Q63HN8	RLLQEQHQL	Linear	(4648=4656)	Both conditions	FALSE	FALSE
RNF213	Q63HN8	ALVSYLIRL	Linear	(4882=4890)	Both conditions	FALSE	FALSE
RNF213	Q63HN8	REKEVKRYLW	Linear	(582=591)	Both conditions	FALSE	FALSE
RNF213	Q63HN8	SEEAKSILL	Linear	(3251=3259)	Both conditions	FALSE	FALSE
RNF213	Q63HN8	GLAEDSPKM	Linear	(2847=2855)	Both conditions	FALSE	FALSE
RNF213	Q63HN8	QEAGTFRHTLW	Linear	(3615=3625)	Both conditions	FALSE	FALSE
RNF213	Q63HN8	HEESREYSL	Linear	(1574=1582)	Both conditions	FALSE	FALSE
RNF213	Q63HN8	VADSVLTKV	Linear	(1084=1092)	Both conditions	FALSE	FALSE
RNF213	Q63HN8	HEHSAMLLAQL	Linear	(2652=2662)	Both conditions	TRUE	FALSE
RNF213	Q63HN8	LLTHLALLL	Linear	(4584=4592)	Both conditions	TRUE	FALSE
RNF213	Q63HN8	ELKEEGGPCL	Linear	(54=63)	IFN-ɣ untreated	TRUE	FALSE
RNF213	Q63HN8	EVFTKNML	Linear	(916=923)	IFN-ɣ untreated	FALSE	FALSE
RNF213	Q63HN8	QLSDVAEKL	Linear	(2584=2592)	Both conditions	FALSE	FALSE
RNF213	Q63HN8	SEFSLVDKL	Linear	(1770=1778)	Both conditions	FALSE	FALSE
RNF213	Q63HN8	YTAEQLVYL	Linear	(1704=1712)	Both conditions	FALSE	FALSE
RNF213	Q63HN8	TMLLNIPLV	Linear	(3672=3680)	Both conditions	FALSE	FALSE
RNF213	Q63HN8	NCTLRDVLRAS	Linear	(1735=1745)	Both conditions	TRUE	FALSE
RNF213	Q63HN8	VEIQFPAEHGW	Linear	(943=953)	Both conditions	FALSE	FALSE
RNF213	Q63HN8	RLLNFDTEL	Linear	(4660=4668)	Both conditions	FALSE	FALSE
RNF213	Q63HN8	AESRYLLVL	Linear	(3037=3045)	Both conditions	FALSE	FALSE
RNF213	Q63HN8	SCWDTKGLEDSV	Linear	(980=991)	IFN-ɣ treated	TRUE	FALSE
RNF213	Q63HN8	YLMDINGKMWL	Linear	(2078=2088)	IFN-ɣ treated	FALSE	FALSE
RNF213	Q63HN8	MELAPRHKDAW	Linear	(702=712)	IFN-ɣ treated	FALSE	FALSE
RNF213	Q63HN8	TEAISCIKEVL	Linear	(2492=2502)	IFN-ɣ treated	FALSE	FALSE
RNF213	Q63HN8	IADSENNNSTM	Linear	(31=41)	IFN-ɣ treated	TRUE	FALSE
RNF213	Q63HN8	WESEPHPYVFF	Linear	(2298=2308)	IFN-ɣ treated	FALSE	FALSE
RNF213	Q63HN8	AEDSGLHII	Linear	(2513=2521)	IFN-ɣ treated	FALSE	FALSE
RNF213	Q63HN8	QEDAESRYLL	Linear	(3034=3043)	IFN-ɣ treated	TRUE	FALSE
RNF213	Q63HN8	WESEPHPYVF	Linear	(2298=2307)	IFN-ɣ treated	FALSE	FALSE
RNF213	Q63HN8	TEERFRPQW	Linear	(5148=5156)	IFN-ɣ treated	FALSE	FALSE
RNF213	Q63HN8	VLKWNREMR	Linear	(5199=5207)	IFN-ɣ treated	TRUE	FALSE
RNF213	Q63HN8	TEDAAQELL	Linear	(234=242)	IFN-ɣ treated	TRUE	FALSE
RNF213	Q63HN8	MAIHAAAVL	Linear	(4446=4454)	IFN-ɣ treated	FALSE	FALSE
RNF213	Q63HN8	FSLLPLSHL	Linear	(762=770)	IFN-ɣ treated	FALSE	FALSE
RNF213	Q63HN8	LELHEMIIL	Linear	(5131=5139)	IFN-ɣ treated	TRUE	FALSE
RNF213	Q63HN8	SEAQSSPQF	Linear	(188=196)	IFN-ɣ treated	FALSE	FALSE
RNF213	Q63HN8	REEDLAPFSL	Linear	(2285=2294)	IFN-ɣ treated	FALSE	FALSE
RNF213	Q63HN8	VERDLTPLI	Linear	(4925=4933)	IFN-ɣ treated	FALSE	FALSE
RNF213	Q63HN8	MEARWNHEL	Linear	(3843=3851)	IFN-ɣ treated	TRUE	FALSE
RNF213	Q63HN8	RLVEIQFPA	Linear	(941=949)	IFN-ɣ treated	FALSE	FALSE
RNF213	Q63HN8	EEGRFLKAY	Linear	(4200=4208)	IFN-ɣ treated	FALSE	FALSE
RNF213	Q63HN8	AVLKWNREMR	Linear	(5198=5207)	IFN-ɣ treated	FALSE	FALSE
RNF213	Q63HN8	METGKMVLL	Linear	(3094=3102)	IFN-ɣ treated	TRUE	FALSE
RNF213	Q63HN8	SLLPLSHLV	Linear	(763=771)	IFN-ɣ treated	FALSE	FALSE
RNF213	Q63HN8	QEVKASTL	Linear	(366=373)	IFN-ɣ treated	FALSE	FALSE
RNF213	Q63HN8	KEGGDVTEL	Linear	(1664=1672)	IFN-ɣ treated	TRUE	FALSE
RNF213	Q63HN8	SQDKRISSNPV	Linear	(4704=4714)	IFN-ɣ treated	TRUE	FALSE
RNF213	Q63HN8	ITKSWPRT	Linear	(1033=1040)	IFN-ɣ treated	TRUE	FALSE
RNF213	Q63HN8	EQIKEYHHL	Linear	(1341=1349)	IFN-ɣ treated	FALSE	FALSE
RNF213	Q63HN8	SVLTKVVG	Linear	(1087=1094)	IFN-ɣ treated	TRUE	FALSE
RNF213	Q63HN8	KTQRMKQPPAT	Linear	(292=302)	IFN-ɣ treated	TRUE	FALSE
RNF213	Q63HN8	CRMIRLLSL	Linear	(876=884)	IFN-ɣ treated	TRUE	FALSE
RNF213	Q63HN8	FHAIISLH	Linear	(383=390)	IFN-ɣ treated	TRUE	FALSE
RNF213	Q63HN8	LKQVHLVSF	Linear	(2799=2807)	IFN-ɣ treated	TRUE	FALSE
RNF213	Q63HN8	FLQAHLHTA	Linear	(3299=3307)	IFN-ɣ treated	FALSE	FALSE
RNF213	Q63HN8	PEEESERHIL	Linear	(1260=1269)	IFN-ɣ treated	TRUE	FALSE
RNF213	Q63HN8	EESQFHPLEW	Linear	(3594=3603)	IFN-ɣ treated	FALSE	FALSE
RNF213	Q63HN8	AEIDVIFKDF	Linear	(1301=1310)	Both conditions	FALSE	FALSE
RNF213	Q63HN8	LLLDEITRA	Linear	(2720=2728)	IFN-ɣ treated	FALSE	FALSE
RNF213	Q63HN8	SLLGDMEWRL	Linear	(956=965)	IFN-ɣ treated	FALSE	FALSE
RNF213	Q63HN8	AEDSPKMPL	Linear	(2849=2857)	IFN-ɣ treated	FALSE	FALSE
RNF213	Q63HN8	YLLVLTKNYV	Linear	(3041=3050)	IFN-ɣ treated	TRUE	FALSE
RNF213	Q63HN8	REVFTKNML	Linear	(915=923)	IFN-ɣ treated	FALSE	FALSE
RNF213	Q63HN8	YIQEYLTLL	Linear	(4149=4157)	Both conditions	FALSE	FALSE
RNF213	Q63HN8	QEMAGKIDL	Linear	(1218=1226)	IFN-ɣ treated	TRUE	FALSE
RNF213	Q63HN8	LLAQLNAFL	Linear	(2658=2666)	IFN-ɣ treated	TRUE	FALSE
RNF213	Q63HN8	NLDGTVTEM	Linear	(4438=4446)	IFN-ɣ treated	FALSE	FALSE
RNF213	Q63HN8	KLLQDISEA	Linear	(1405=1413)	IFN-ɣ treated	FALSE	FALSE
RNF213	Q63HN8	RENEDRIFVY	Linear	(3406=3415)	IFN-ɣ treated	FALSE	FALSE
RNF213	Q63HN8	AGENDIDVDRV	Linear	(1452=1462)	IFN-ɣ treated	TRUE	FALSE
RNF213	Q63HN8	FGLDLVTEL	Linear	(1655=1663)	IFN-ɣ treated	FALSE	FALSE
RNF213	Q63HN8	VLSVVEVTL	Linear	(5024=5032)	IFN-ɣ treated	FALSE	FALSE
RNF213	Q63HN8	GSGSLAQAVI	Linear	(3904=3913)	IFN-ɣ treated	TRUE	FALSE
RNF213	Q63HN8	DLYQGLLLQ	Linear	(2349=2357)	IFN-ɣ treated	TRUE	FALSE
RNF213	Q63HN8	VMEELPLMLL	Linear	(1760=1769)	IFN-ɣ treated	TRUE	FALSE
RNF213	Q63HN8	EELPLMLL	Linear	(1762=1769)	IFN-ɣ treated	FALSE	FALSE
RNF213	Q63HN8	MCNSFFVD	Linear	(4064=4071)	IFN-ɣ treated	TRUE	FALSE
RNF213	Q63HN8	SWTVQESKKK	Linear	(82=91)	IFN-ɣ treated	TRUE	FALSE
RNF213	Q63HN8	LFINCLED	Linear	(4173=4180)	IFN-ɣ treated	TRUE	FALSE
RNF213	Q63HN8	EEEGRFLKAY	Linear	(4199=4208)	IFN-ɣ treated	FALSE	FALSE
RNF213	Q63HN8	LKEEGGPCL	Linear	(55=63)	IFN-ɣ treated	TRUE	FALSE
RNF213	Q63HN8	ALTEELHQK	Linear	(3241=3249)	IFN-ɣ treated	TRUE	FALSE
RNF213	Q63HN8	KQCYLQQVK	Linear	(4256=4264)	IFN-ɣ treated	TRUE	FALSE
RNF213	Q63HN8	VAFANKDQHQ	Linear	(2470=2479)	IFN-ɣ treated	TRUE	FALSE
RNF213	Q63HN8	ISSNPVAKII	Linear	(4709=4718)	IFN-ɣ treated	TRUE	FALSE
RNF213	Q63HN8	ALSPSYLTV	Linear	(839=847)	IFN-ɣ treated	FALSE	FALSE
RNF213	Q63HN8	GLDAFLLEL	Linear	(5125=5133)	IFN-ɣ treated	TRUE	FALSE
RNF213	Q63HN8	ALLNLLRSL	Cis-Spliced	(4600=4605;4841=4843)	IFN-ɣ treated	TRUE	FALSE
RNF213	Q63HN8	ALLPFLLKL	Cis-Spliced	(2038=2042;4134=4137)	IFN-ɣ untreated	TRUE	FALSE
RNF213	Q63HN8	ALSHLPPT	Cis-Spliced	(2332=2336;223=225)	Both conditions	TRUE	FALSE
RNF213	Q63HN8	ALSLRLAAL	Cis-Spliced	(1420=1424;1673=1676)	IFN-ɣ untreated	TRUE	FALSE
RNF213	Q63HN8	AVLQEVARL	Cis-Spliced	(4340=4341;4226=4232)	IFN-ɣ treated	TRUE	FALSE
RNF213	Q63HN8	AVLSFLKEV	Cis-Spliced	(2982=2984;3357=3362)	Both conditions	TRUE	FALSE
RNF213	Q63HN8	FLLLPLSHL	Cis-Spliced	(777=778;764=770)	Both conditions	TRUE	FALSE
RNF213	Q63HN8	KKLEAEKL	Cis-Spliced	(2372=2375;2589=2592)	IFN-ɣ treated	TRUE	FALSE
RNF213	Q63HN8	KLLLLELHV	Cis-Spliced	(2072=2076;4917=4920)	IFN-ɣ untreated	TRUE	FALSE
RNF213	Q63HN8	LALGKNLAL	Cis-Spliced	(2687=2690;2744=2748)	Both conditions	TRUE	FALSE
RNF213	Q63HN8	LALQRQAPL	Cis-Spliced	(4788=4792;1953=1956)	Both conditions	TRUE	FALSE
RNF213	Q63HN8	LAMAVLHSL	Cis-Spliced	(1638=1641;3838=3842)	IFN-ɣ untreated	TRUE	FALSE
RNF213	Q63HN8	LASAKKGN	Cis-Spliced	(3391=3394;97=100)	IFN-ɣ untreated	TRUE	FALSE
RNF213	Q63HN8	LATRVPLL	Cis-Spliced	(1536=1538;4764=4768)	IFN-ɣ treated	TRUE	FALSE
RNF213	Q63HN8	LFLDGLLSL	Cis-Spliced	(2731=2735;4092=4095)	Both conditions	TRUE	FALSE
RNF213	Q63HN8	LGLQEVARL	Cis-Spliced	(4351=4352;4226=4232)	Both conditions	TRUE	FALSE
RNF213	Q63HN8	LKPPVTPSL	Cis-Spliced	(4605=4609;2264=2267)	Both conditions	TRUE	FALSE
RNF213	Q63HN8	LLAALLPEL	Cis-Spliced	(1672=1676;3472=3475)	IFN-ɣ treated	TRUE	FALSE
RNF213	Q63HN8	LLLNKLLLL	Cis-Spliced	(3101=3104;2072=2076)	IFN-ɣ treated	TRUE	FALSE
RNF213	Q63HN8	LLNKEVSL	Cis-Spliced	(1588=1591;3808=3811)	Both conditions	TRUE	FALSE
RNF213	Q63HN8	LLPEMVNL	Cis-Spliced	(5173=5177;677=679)	IFN-ɣ untreated	TRUE	FALSE
RNF213	Q63HN8	LLQEKLLLL	Cis-Spliced	(4649=4652;2072=2076)	IFN-ɣ treated	TRUE	FALSE
RNF213	Q63HN8	LLRDLLLLK	Cis-Spliced	(1226=1229;1147=1151)	Both conditions	TRUE	FALSE
RNF213	Q63HN8	LLTHLLPAL	Cis-Spliced	(4584=4588;867=870)	IFN-ɣ untreated	TRUE	FALSE
RNF213	Q63HN8	LNLPLLKTV	Cis-Spliced	(3675=3679;1519=1522)	IFN-ɣ treated	TRUE	FALSE
RNF213	Q63HN8	MLTEKQHLL	Cis-Spliced	(922=924;746=751)	Both conditions	TRUE	FALSE
RNF213	Q63HN8	NSDELLLK	Cis-Spliced	(3962=3964;1107=1111)	Both conditions	TRUE	FALSE
RNF213	Q63HN8	QDSTPLLL	Cis-Spliced	(5000=5002;4930=4934)	Both conditions	TRUE	FALSE
RNF213	Q63HN8	QVLESVQRL	Cis-Spliced	(3232=3235;1615=1619)	IFN-ɣ untreated	TRUE	FALSE
RNF213	Q63HN8	TEFELLNKL	Cis-Spliced	(4864=4866;1587=1592)	IFN-ɣ treated	TRUE	FALSE
RNF213	Q63HN8	TFEELLNKL	Cis-Spliced	(1870=1872;1587=1592)	IFN-ɣ treated	TRUE	FALSE
RNF213	Q63HN8	TLLKKLSHL	Cis-Spliced	(4155=4159;2333=2336)	IFN-ɣ untreated	TRUE	FALSE
RNF213	Q63HN8	TVLEELNKL	Cis-Spliced	(3178=3181;3401=3405)	IFN-ɣ untreated	TRUE	FALSE
RNF213	Q63HN8	VAELLKPPV	Cis-Spliced	(3502=3504;4604=4609)	IFN-ɣ treated	TRUE	FALSE
RNF213	Q63HN8	VALQEVARL	Cis-Spliced	(4341=4342;4226=4232)	IFN-ɣ treated	TRUE	FALSE
RNF213	Q63HN8	VALSFLKEV	Cis-Spliced	(3050=3052;3357=3362)	IFN-ɣ untreated	TRUE	FALSE
RNF213	Q63HN8	VTLSVLHLL	Cis-Spliced	(3461=3464;1562=1566)	Both conditions	TRUE	FALSE
RNF213	Q63HN8	YAVVRSKL	Cis-Spliced	(4896=4898;616=620)	IFN-ɣ treated	TRUE	FALSE
RNPEP	H7C2T3	LADVIIHEI	Linear	(65=73)	Both conditions	FALSE	FALSE
RNPEP	H7C2T3	SLADVIIHEI	Linear	(64=73)	Both conditions	FALSE	FALSE
RNPEP	H7C2T3	HEFKFRSIL	Linear	(151=159)	IFN-ɣ treated	TRUE	FALSE
RNPEP	H7C2T3	YAQRRISTIL	Linear	(99=108)	IFN-ɣ treated	TRUE	FALSE
RNPEP	H7C2T3	TPYEKGFCFV	Linear	(120=129)	IFN-ɣ treated	TRUE	FALSE
RPL32	F8W727	YCAEIAHNV	Linear	(113=121)	Both conditions	FALSE	FALSE
RPL32	F8W727	FLVHNVKEL	Linear	(95=103)	IFN-ɣ treated	FALSE	FALSE
RPL32	F8W727	QSDRYVKI	Linear	(24=31)	IFN-ɣ treated	TRUE	FALSE
RPL32	F8W727	QLAELAHNV	Cis-Spliced	(135=136;115=121)	IFN-ɣ treated	TRUE	FALSE
RUNX2	I3L354	TVFTNPPQV	Linear	(188=196)	Both conditions	FALSE	FALSE
RUNX2	I3L354	IIADHPAEL	Linear	(91=99)	Both conditions	TRUE	FALSE
RUNX2	I3L354	IADHPAEL	Linear	(92=99)	Both conditions	FALSE	FALSE
RUNX2	I3L354	IADHPAELV	Linear	(92=100)	Both conditions	TRUE	FALSE
RUNX2	I3L354	AELRNASAVM	Linear	(152=161)	IFN-ɣ untreated	FALSE	FALSE
RUNX2	I3L354	KMSDVSPVV	Linear	(24=32)	Both conditions	TRUE	FALSE
RUNX2	I3L354	ITDVPRRI	Linear	(260=267)	Both conditions	FALSE	FALSE
RUNX2	I3L354	KTLPVAFKV	Linear	(120=128)	IFN-ɣ untreated	FALSE	FALSE
RUNX2	I3L354	GEVPDGTVV	Linear	(132=140)	Both conditions	TRUE	FALSE
RUNX2	I3L354	GEVPDGTVVTVM	Linear	(132=143)	IFN-ɣ treated	TRUE	FALSE
RUNX2	I3L354	KMSDVSPVVA	Linear	(24=33)	IFN-ɣ treated	TRUE	FALSE
RUNX2	I3L354	STRGTGLPAI	Linear	(251=260)	IFN-ɣ treated	TRUE	FALSE
RUNX2	I3L354	YLSQMTSPSI	Linear	(234=243)	IFN-ɣ treated	TRUE	FALSE
RXRG	P48443	KLIGDTPIDTFL	Linear	(441=452)	Both conditions	FALSE	FALSE
RXRG	P48443	KLLLRLPAL	Linear	(418=426)	Both conditions	FALSE	FALSE
RXRG	P48443	ILLATGLHV	Linear	(325=333)	IFN-ɣ untreated	FALSE	FALSE
RXRG	P48443	VLTELVLTL	Cis-Spliced	(350=355;293=295)	IFN-ɣ treated	TRUE	FALSE
S100A11	P31949	YTLSKTEFL	Linear	(32=40)	Both conditions	TRUE	FALSE
S100A11	P31949	FLSFMNTEL	Linear	(39=47)	Both conditions	FALSE	FALSE
S100A11	P31949	SEFLNLIGGL	Linear	(78=87)	Both conditions	FALSE	FALSE
S100A11	P31949	IGGLAMACHDSF	Linear	(84=95)	IFN-ɣ treated	FALSE	FALSE
S100A11	P31949	FLKAVPSQKRT	Linear	(95=105)	IFN-ɣ treated	FALSE	FALSE
S100A11	P31949	LKAVPSQKRT	Linear	(96=105)	IFN-ɣ treated	FALSE	FALSE
S100A11	P31949	FLNLIGGLAM	Linear	(80=89)	IFN-ɣ treated	FALSE	FALSE
S100A11	P31949	NLIGGLAMA	Linear	(82=90)	IFN-ɣ treated	TRUE	FALSE
S100A11	P31949	TEFLSFMNTEL	Linear	(37=47)	IFN-ɣ treated	FALSE	FALSE
S100A11	P31949	GQLDFSEFL	Linear	(73=81)	IFN-ɣ treated	FALSE	FALSE
S100A11	P31949	SEFLNLIGGLAM	Linear	(78=89)	IFN-ɣ treated	TRUE	FALSE
S100A13	Q99584	SELKFNEYW	Linear	(69=77)	Both conditions	FALSE	FALSE
S100A13	Q99584	SLDEKMKSL	Linear	(55=63)	IFN-ɣ treated	FALSE	FALSE
S100A16	Q96FQ6	TELEKAVIVL	Linear	(6=15)	Both conditions	FALSE	FALSE
S100A16	Q96FQ6	ITGPIAKL	Linear	(86=93)	IFN-ɣ untreated	TRUE	FALSE
S100A16	Q96FQ6	AADKLIQNL	Linear	(58=66)	Both conditions	FALSE	FALSE
S100A16	Q96FQ6	REMLQKELNHML	Linear	(39=50)	IFN-ɣ treated	TRUE	FALSE
S100A2	P29034	GEMKELLHKEL	Linear	(33=43)	IFN-ɣ untreated	FALSE	FALSE
S100A2	P29034	SLDENSDQQV	Linear	(62=71)	Both conditions	TRUE	FALSE
S100A6	P06703	KELTIGSKL	Linear	(40=48)	Both conditions	FALSE	FALSE
S100A6	P06703	AEIARLMEDL	Linear	(51=60)	Both conditions	FALSE	FALSE
S100A6	P06703	KLQDAEIARL	Linear	(47=56)	Both conditions	FALSE	FALSE
S100A6	P06703	LQDAEIARL	Linear	(48=56)	Both conditions	FALSE	FALSE
S100A6	P06703	ALALIYNEAL	Linear	(79=88)	Both conditions	FALSE	FALSE
S100A6	P06703	IYNEALKG	Linear	(83=90)	Both conditions	FALSE	FALSE
S100A6	P06703	DRNKDQEVNF	Linear	(61=70)	IFN-ɣ untreated	FALSE	FALSE
S100A6	P06703	ALALIYNEA	Linear	(79=87)	Both conditions	FALSE	FALSE
S100A6	P06703	DRNKDQEVNFQE	Linear	(61=72)	IFN-ɣ treated	FALSE	FALSE
S100A6	P06703	ALIYNEALKG	Linear	(81=90)	IFN-ɣ treated	FALSE	FALSE
S100A6	P06703	QEVNFQEYVTF	Linear	(66=76)	IFN-ɣ treated	FALSE	FALSE
S100A7	P31151	QNTQAERSLLG	Cis-Spliced	(5;3=12)	Both conditions	TRUE	FALSE
S100A8	P05109	HAVYRDDLKKL	Linear	(27=37)	IFN-ɣ untreated	FALSE	FALSE
S100A8	P05109	DINTDGAVNF	Linear	(59=68)	Both conditions	FALSE	FALSE
S100A9	P06702	DTNADKQLSF	Linear	(67=76)	IFN-ɣ treated	FALSE	FALSE
S100A9	P06702	LDTNADKQLS	Linear	(66=75)	IFN-ɣ treated	FALSE	FALSE
S100A9	P06702	VRKDLQNF	Linear	(41=48)	IFN-ɣ treated	FALSE	FALSE
SART1	O43290	EEFGQRRQDLY	Linear	(239=249)	Both conditions	TRUE	FALSE
SART1	O43290	EEYRGFTQDF	Linear	(689=698)	Both conditions	FALSE	FALSE
SART1	O43290	KLGLKPLEV	Linear	(129=137)	Both conditions	FALSE	FALSE
SART1	O43290	AELELQKQL	Linear	(495=503)	Both conditions	FALSE	FALSE
SART1	O43290	YVDETGRKL	Linear	(712=720)	Both conditions	FALSE	FALSE
SART1	O43290	KLDEEALL	Linear	(749=756)	Both conditions	FALSE	FALSE
SART1	O43290	REGETMILTL	Linear	(267=276)	Both conditions	FALSE	FALSE
SART1	O43290	RELEEIRAKL	Linear	(363=372)	Both conditions	FALSE	FALSE
SART1	O43290	GLLETTVQKV	Linear	(649=658)	Both conditions	FALSE	FALSE
SART1	O43290	GEIPTYGL	Linear	(564=571)	Both conditions	FALSE	FALSE
SART1	O43290	EELEGERPHSF	Linear	(339=349)	IFN-ɣ treated	FALSE	FALSE
SART1	O43290	LLETTVQKV	Linear	(650=658)	Both conditions	TRUE	FALSE
SART1	O43290	KERAEKNVEL	Linear	(297=306)	IFN-ɣ treated	FALSE	FALSE
SART1	O43290	LRERELEEI	Linear	(360=368)	Both conditions	FALSE	FALSE
SART1	O43290	QVLEEDEAELEL	Linear	(488=499)	IFN-ɣ treated	TRUE	FALSE
SIN3A	Q96ST3	AAALIIHHV	Linear	(790=798)	Both conditions	FALSE	FALSE
SIN3A	Q96ST3	TTAEKVDSV	Linear	(392=400)	Both conditions	FALSE	FALSE
SIN3A	Q96ST3	IMHHFIPDL	Linear	(815=823)	IFN-ɣ untreated	TRUE	FALSE
SIN3A	Q96ST3	REREWEREVL	Linear	(922=931)	Both conditions	FALSE	FALSE
SIN3A	Q96ST3	YADKAADII	Linear	(673=681)	IFN-ɣ untreated	TRUE	FALSE
SIN3A	Q96ST3	NSDTTSPEL	Linear	(1107=1115)	Both conditions	FALSE	FALSE
SIN3A	Q96ST3	FLPPGYKIEV	Linear	(185=194)	IFN-ɣ untreated	FALSE	FALSE
SIN3A	Q96ST3	REMFTIHAY	Linear	(984=992)	Both conditions	FALSE	FALSE
SIN3A	Q96ST3	RLDDQESPVYAA	Linear	(4=15)	Both conditions	TRUE	FALSE
SIN3A	Q96ST3	AALIIHHV	Linear	(791=798)	IFN-ɣ untreated	TRUE	FALSE
SIN3A	Q96ST3	KSDSPAIQL	Linear	(937=945)	Both conditions	FALSE	FALSE
SIN3A	Q96ST3	AEEQAKFRL	Linear	(645=653)	Both conditions	TRUE	FALSE
SIN3A	Q96ST3	REQNEKYYL	Linear	(718=726)	IFN-ɣ treated	FALSE	FALSE
SIN3A	Q96ST3	QEVYAQVARLF	Linear	(356=366)	IFN-ɣ treated	FALSE	FALSE
SIN3A	Q96ST3	RLDDQESPVYA	Linear	(4=14)	IFN-ɣ treated	TRUE	FALSE
SIN3A	Q96ST3	KEAGGNYTPAL	Linear	(343=353)	IFN-ɣ treated	TRUE	FALSE
SIN3A	Q96ST3	FLPDANSSV	Linear	(379=387)	IFN-ɣ treated	FALSE	FALSE
SIN3A	Q96ST3	SLLNEIESI	Linear	(748=756)	IFN-ɣ treated	FALSE	FALSE
SIN3A	Q96ST3	ESALQKKL	Cis-Spliced	(526=527;635=640)	IFN-ɣ treated	TRUE	FALSE
SIN3A	Q96ST3	FLGKLNEL	Cis-Spliced	(507=510;750=753)	IFN-ɣ treated	TRUE	FALSE
SIN3A	Q96ST3	KAADLAQKL	Cis-Spliced	(676=680;873=876)	IFN-ɣ untreated	TRUE	FALSE
SIN3A	Q96ST3	KLLNLKDSL	Cis-Spliced	(443=448;981=983)	Both conditions	TRUE	FALSE
SIN3A	Q96ST3	LEALVRSLL	Cis-Spliced	(633=636;966=970)	Both conditions	TRUE	FALSE
SIN3A	Q96ST3	LLMGFKPV	Cis-Spliced	(178=182;1122=1124)	Both conditions	TRUE	FALSE
SIN3A	Q96ST3	VLLLLHHV	Cis-Spliced	(743=744;793=798)	IFN-ɣ untreated	TRUE	FALSE
SIN3A	Q96ST3	YAAKPKLL	Cis-Spliced	(13=15;441=445)	Both conditions	TRUE	FALSE
SMC3	Q9UQE7	KEELAQYQKW	Linear	(207=216)	Both conditions	FALSE	FALSE
SMC3	Q9UQE7	NELRETEGGTVL	Linear	(848=859)	Both conditions	FALSE	FALSE
SMC3	Q9UQE7	YEVKNKKDEL	Linear	(456=465)	Both conditions	FALSE	FALSE
SMC3	Q9UQE7	HIDVITAEM	Linear	(1197=1205)	Both conditions	FALSE	FALSE
SMC3	Q9UQE7	LSDEFSHL	Linear	(49=56)	Both conditions	FALSE	FALSE
SMC3	Q9UQE7	DELQSERNY	Linear	(463=471)	Both conditions	FALSE	FALSE
SMC3	Q9UQE7	REENAEQQAL	Linear	(474=483)	Both conditions	FALSE	FALSE
SMC3	Q9UQE7	KLDQDLNEV	Linear	(436=444)	Both conditions	FALSE	FALSE
SMC3	Q9UQE7	EENAEQQAL	Linear	(475=483)	Both conditions	FALSE	FALSE
SMC3	Q9UQE7	IVDPFSSKHNV	Linear	(19=29)	Both conditions	FALSE	FALSE
SMC3	Q9UQE7	HAMESTRESL	Linear	(768=777)	Both conditions	FALSE	FALSE
SMC3	Q9UQE7	VEVTAGNRL	Linear	(550=558)	Both conditions	FALSE	FALSE
SMC3	Q9UQE7	QLLNERIKL	Linear	(813=821)	Both conditions	TRUE	FALSE
SMC3	Q9UQE7	KREKINELL	Linear	(185=193)	Both conditions	TRUE	FALSE
SMC3	Q9UQE7	TNDAIPMIS	Linear	(603=611)	IFN-ɣ untreated	TRUE	FALSE
SMC3	Q9UQE7	YLFDEIDQAL	Linear	(1140=1149)	Both conditions	FALSE	FALSE
SMC3	Q9UQE7	EELAQYQKW	Linear	(208=216)	Both conditions	FALSE	FALSE
SMC3	Q9UQE7	RETEGGTVL	Linear	(851=859)	Both conditions	FALSE	FALSE
SMC3	Q9UQE7	QLFRKLEQC	Linear	(964=972)	IFN-ɣ treated	TRUE	FALSE
SMC3	Q9UQE7	GELEAKLNENL	Linear	(690=700)	IFN-ɣ treated	TRUE	FALSE
SMC3	Q9UQE7	ALIFAIQKC	Linear	(1126=1134)	IFN-ɣ treated	TRUE	FALSE
SMC3	Q9UQE7	REDLEKKQQLL	Linear	(487=497)	IFN-ɣ treated	TRUE	FALSE
SMC3	Q9UQE7	GEMREMQQL	Linear	(1107=1115)	IFN-ɣ treated	FALSE	FALSE
SMC3	Q9UQE7	QELNETRAKL	Linear	(230=239)	IFN-ɣ treated	FALSE	FALSE
SMC3	Q9UQE7	VSDMIMELAVHA	Linear	(1157=1168)	IFN-ɣ treated	TRUE	FALSE
SMC3	Q9UQE7	AELGTDLLSQL	Linear	(779=789)	IFN-ɣ treated	TRUE	FALSE
SMC3	Q9UQE7	LSLEYLKQV	Cis-Spliced	(789=792;2=6)	IFN-ɣ treated	TRUE	FALSE
SMC3	Q9UQE7	TEANKELQL	Cis-Spliced	(423=428;1029=1031)	IFN-ɣ treated	TRUE	FALSE
SSR2	E9PQJ7	YAVEGRDLTL	Linear	(33=42)	Both conditions	FALSE	FALSE
SSR2	E9PQJ7	YAVEGRDL	Linear	(33=40)	Both conditions	FALSE	FALSE
SSR2	E9PQJ7	RLLSFVVLA	Linear	(2=10)	Both conditions	FALSE	FALSE
SSR2	E9PQJ7	EEGARLLA	Linear	(18=25)	IFN-ɣ untreated	TRUE	FALSE
SSR2	E9PQJ7	YAVEGRDLTLQ	Linear	(33=43)	IFN-ɣ treated	TRUE	FALSE
STAT1	P42224	QQLDSKFLEQV	Linear	(8=18)	Both conditions	FALSE	FALSE
STAT1	P42224	EELEQKYTY	Linear	(281=289)	Both conditions	FALSE	FALSE
STAT1	P42224	VLWDRTFSL	Linear	(300=308)	Both conditions	FALSE	FALSE
STAT1	P42224	KLQELNYNL	Linear	(350=358)	Both conditions	FALSE	FALSE
STAT1	P42224	HEIKSLEDL	Linear	(158=166)	Both conditions	FALSE	FALSE
STAT1	P42224	VLWDRTFSLF	Linear	(300=309)	Both conditions	FALSE	FALSE
STAT1	P42224	VMLDKQKEL	Linear	(134=142)	Both conditions	FALSE	FALSE
STAT1	P42224	QLDSKFLEQV	Linear	(9=18)	Both conditions	TRUE	FALSE
STAT1	P42224	VLWDRTFS	Linear	(300=307)	Both conditions	FALSE	FALSE
STAT1	P42224	QLLLKKMYL	Linear	(196=204)	Both conditions	FALSE	FALSE
STAT1	P42224	MEESTNGSL	Linear	(392=400)	Both conditions	TRUE	FALSE
STAT1	P42224	IVAESLQQV	Linear	(265=273)	Both conditions	FALSE	FALSE
STAT1	P42224	KVMCIEHEI	Linear	(152=160)	IFN-ɣ untreated	TRUE	FALSE
STAT1	P42224	KLEELEQKY	Linear	(279=287)	Both conditions	FALSE	FALSE
STAT1	P42224	QLIQSSFVV	Linear	(311=319)	Both conditions	TRUE	FALSE
STAT1	P42224	QEQLLLKKMY	Linear	(194=203)	IFN-ɣ treated	FALSE	FALSE
STAT1	P42224	FVVERQPCM	Linear	(317=325)	IFN-ɣ treated	FALSE	FALSE
STAT1	P42224	FATIRFHDL	Linear	(52=60)	IFN-ɣ treated	FALSE	FALSE
STAT1	P42224	YEHDPITKN	Linear	(289=297)	IFN-ɣ treated	TRUE	FALSE
STAT1	P42224	VSEVHPSRL	Linear	(709=717)	IFN-ɣ treated	FALSE	FALSE
STAT1	P42224	LQDEYDFKC	Linear	(166=174)	IFN-ɣ treated	TRUE	FALSE
STAT1	P42224	REGAITFTW	Linear	(608=616)	Both conditions	FALSE	FALSE
STAT1	P42224	WEHAANDVSF	Linear	(43=52)	IFN-ɣ treated	FALSE	FALSE
STAT1	P42224	IELLNVTEL	Linear	(218=226)	IFN-ɣ treated	FALSE	FALSE
STAT1	P42224	TIRFHDLL	Linear	(54=61)	IFN-ɣ treated	FALSE	FALSE
STAT1	P42224	AENIPENPLKY	Linear	(656=666)	IFN-ɣ treated	FALSE	FALSE
STAT1	P42224	RLLVKLQEL	Linear	(346=354)	IFN-ɣ treated	FALSE	FALSE
STAT1	P42224	EEFDEVSRI	Linear	(729=737)	IFN-ɣ treated	FALSE	FALSE
STAT1	P42224	NILGTHTKV	Linear	(381=389)	IFN-ɣ treated	TRUE	FALSE
STAT1	P42224	FSLENNFLL	Linear	(71=79)	Both conditions	FALSE	FALSE
STAT1	P42224	ALLKDQQPGTFL	Linear	(589=600)	IFN-ɣ treated	TRUE	FALSE
STAT1	P42224	AEPRNLSFFL	Linear	(479=488)	IFN-ɣ treated	FALSE	FALSE
STAT1	P42224	SEVHPSRL	Linear	(710=717)	IFN-ɣ treated	FALSE	FALSE
STAT1	P42224	VLWDRTFSLFQQ	Linear	(300=311)	IFN-ɣ treated	FALSE	FALSE
STAT1	P42224	EHAANDVSFATI	Linear	(44=55)	IFN-ɣ treated	TRUE	FALSE
STAT1	P42224	FTIVAESLQQV	Linear	(263=273)	IFN-ɣ treated	TRUE	FALSE
STAT1	P42224	KEAPEPMEL	Linear	(685=693)	IFN-ɣ treated	FALSE	FALSE
STAT1	P42224	SESSREGAITF	Linear	(604=614)	IFN-ɣ treated	TRUE	FALSE
STAT1	P42224	VLWDRTFSLFQ	Linear	(300=310)	IFN-ɣ treated	TRUE	FALSE
STAT1	P42224	QEQLLLKKM	Linear	(194=202)	IFN-ɣ treated	FALSE	FALSE
STAT1	P42224	VLWDRTFKL	Cis-Spliced	(300=306;279=280)	Both conditions	TRUE	FALSE
STAT1	P42224	VLWDRTFLV	Cis-Spliced	(300=306;333=334)	Both conditions	TRUE	FALSE
STAT1	P42224	VLWDRTFNL	Cis-Spliced	(300=305;380=382)	Both conditions	TRUE	FALSE
STAT1	P42224	VLWDRTFVV	Cis-Spliced	(300=305;317=319)	IFN-ɣ treated	TRUE	FALSE
STEAP3	Q658P3	ALAEKTSHV	Linear	(480=488)	Both conditions	FALSE	FALSE
STEAP3	Q658P3	PTLLALPVS	Cis-Spliced	(215=219;250=253)	Both conditions	TRUE	FALSE
STEAP3	Q658P3	SLGFVAVR	Cis-Spliced	(397=402;232=233)	Both conditions	TRUE	FALSE
TAGLN2	P37802	GMTGYGMPRQIL	Linear	(188=199)	Both conditions	FALSE	FALSE
TAGLN2	P37802	FSDNQLQEGKN	Linear	(162=172)	Both conditions	FALSE	FALSE
TAGLN2	P37802	KQMEQISQFL	Linear	(88=97)	Both conditions	FALSE	FALSE
TAGLN2	P37802	QLQEGKNVIGL	Linear	(166=176)	Both conditions	FALSE	FALSE
TAGLN2	P37802	VIGLQMGTNRGA	Linear	(173=184)	Both conditions	TRUE	FALSE
TAGLN2	P37802	TGYGMPRQIL	Linear	(190=199)	Both conditions	FALSE	FALSE
TAGLN2	P37802	TLMNLGGLAV	Linear	(128=137)	Both conditions	FALSE	FALSE
TAGLN2	P37802	RGASQAGMTGY	Linear	(182=192)	IFN-ɣ untreated	FALSE	FALSE
TAGLN2	P37802	QEGKNVIGL	Linear	(168=176)	Both conditions	FALSE	FALSE
TAGLN2	P37802	TLMNLGGLAVA	Linear	(128=138)	Both conditions	FALSE	FALSE
TAGLN2	P37802	GYGMPRQIL	Linear	(191=199)	IFN-ɣ treated	FALSE	FALSE
TAGLN2	P37802	SQAGMTGYGMP	Linear	(185=195)	IFN-ɣ treated	TRUE	FALSE
TAGLN2	P37802	QILIQWITTQ	Linear	(28=37)	IFN-ɣ treated	TRUE	FALSE
TAGLN2	P37802	KIEKQYDADL	Linear	(17=26)	IFN-ɣ treated	TRUE	FALSE
TAGLN2	P37802	TMAFKQME	Linear	(84=91)	IFN-ɣ treated	TRUE	FALSE
TAGLN2	P37802	MEQISQFL	Linear	(90=97)	IFN-ɣ treated	TRUE	FALSE
TAGLN2	P37802	KQYDADLEQILI	Linear	(20=31)	IFN-ɣ treated	TRUE	FALSE
TAP2	Q03519	YTDVGEKGSQL	Linear	(597=607)	Both conditions	FALSE	FALSE
TAP2	Q03519	SLLHMPFTI	Linear	(296=304)	Both conditions	FALSE	FALSE
TAP2	Q03519	YMDRQPNL	Linear	(446=453)	Both conditions	TRUE	FALSE
TAP2	Q03519	HADDFIQEM	Linear	(584=592)	Both conditions	FALSE	FALSE
TAP2	Q03519	FMLSISPRL	Linear	(284=292)	Both conditions	TRUE	FALSE
TAP2	Q03519	VLLRSLVKV	Linear	(270=278)	Both conditions	FALSE	FALSE
TAP2	Q03519	YLHSQVVSV	Linear	(541=549)	Both conditions	FALSE	FALSE
TAP2	Q03519	LSISPRLTL	Linear	(286=294)	Both conditions	TRUE	FALSE
TAP2	Q03519	AAEKVFSYM	Linear	(439=447)	IFN-ɣ treated	TRUE	FALSE
TAP2	Q03519	LEQCRQLYW	Linear	(359=367)	IFN-ɣ treated	TRUE	FALSE
TAP2	Q03519	VLQEGKLQKL	Linear	(674=683)	IFN-ɣ treated	TRUE	FALSE
TAP2	Q03519	VLMWRLLKL	Linear	(136=144)	IFN-ɣ treated	TRUE	FALSE
TAP2	Q03519	REQLFSSLL	Linear	(226=234)	IFN-ɣ treated	TRUE	FALSE
TAP2	Q03519	YQESVGSYV	Linear	(415=423)	IFN-ɣ treated	TRUE	FALSE
TAP2	Q03519	LHMPFTIA	Linear	(298=305)	IFN-ɣ treated	TRUE	FALSE
TAP2	Q03519	VLREIQDAV	Linear	(317=325)	IFN-ɣ treated	FALSE	FALSE
TAP2	Q03519	IAAEKVYNT	Linear	(304=312)	IFN-ɣ treated	TRUE	FALSE
TAP2	Q03519	VCRYKEAL	Linear	(352=359)	IFN-ɣ treated	TRUE	FALSE
TAP2	Q03519	VLLRSLVK	Linear	(270=277)	IFN-ɣ treated	TRUE	FALSE
TAP2	Q03519	SISPRLTLL	Linear	(287=295)	IFN-ɣ treated	TRUE	FALSE
TAP2	Q03519	TLVYIYGDML	Linear	(425=434)	IFN-ɣ treated	TRUE	FALSE
TAP2	Q03519	NLYQPTGGQVLL	Linear	(518=529)	IFN-ɣ treated	TRUE	FALSE
TAP2	Q03519	SLWAVLSPPGA	Linear	(114=124)	IFN-ɣ treated	TRUE	FALSE
TAP2	Q03519	GELTQGSLL	Linear	(402=410)	IFN-ɣ treated	FALSE	FALSE
TAP2	Q03519	FIQEMEHGI	Linear	(588=596)	IFN-ɣ treated	TRUE	FALSE
TAP2	Q03519	ILDEATSALDV	Linear	(629=639)	IFN-ɣ treated	TRUE	FALSE
TAP2	Q03519	GFVGTLLL	Linear	(60=67)	IFN-ɣ treated	TRUE	FALSE
TAP2	Q03519	FMLSISPRLT	Linear	(284=293)	IFN-ɣ treated	TRUE	FALSE
TAP2	Q03519	VLQEGKLQKLA	Linear	(674=684)	IFN-ɣ treated	TRUE	FALSE
TAP2	Q03519	ILDEATSAL	Linear	(629=637)	IFN-ɣ treated	FALSE	FALSE
TAP2	Q03519	TLLPQGLPGL	Linear	(29=38)	IFN-ɣ treated	FALSE	FALSE
TAP2	Q03519	LLRSLVKV	Linear	(271=278)	IFN-ɣ treated	TRUE	FALSE
TAP2	Q03519	YIYGDMLSNV	Linear	(428=437)	IFN-ɣ treated	TRUE	FALSE
TAP2	Q03519	IYGDMLSNVG	Linear	(429=438)	IFN-ɣ treated	TRUE	FALSE
TAP2	Q03519	LALARALAA	Cis-Spliced	(615=620;607=609)	IFN-ɣ treated	TRUE	FALSE
TAP2	Q03519	LNLRLRVLL	Cis-Spliced	(221=225;626=629)	Both conditions	TRUE	FALSE
TAP2	Q03519	MLYQLRGLL	Cis-Spliced	(413=416;55=59)	IFN-ɣ untreated	TRUE	FALSE
TCF3	X6REB3	HLDEAIHVL	Linear	(425=433)	Both conditions	FALSE	FALSE
TCF3	X6REB3	SLDTQPKKV	Linear	(194=202)	Both conditions	FALSE	FALSE
TCF3	X6REB3	GLSEAHNPAGHM	Linear	(668=679)	IFN-ɣ treated	TRUE	FALSE
TCF3	X6REB3	LDTQPKKV	Linear	(195=202)	Both conditions	FALSE	FALSE
TCF3	X6REB3	PQMVLSAPHPGL	Linear	(658=669)	IFN-ɣ treated	TRUE	FALSE
TCP11L2	Q8N4U5	KLFEEIREILL	Linear	(131=141)	Both conditions	FALSE	FALSE
TCP11L2	Q8N4U5	TLMERGLPTL	Linear	(403=412)	Both conditions	FALSE	FALSE
TCP11L2	Q8N4U5	KETFNLKEVL	Linear	(380=389)	Both conditions	FALSE	FALSE
TCP11L2	Q8N4U5	KLFEEIREI	Linear	(131=139)	Both conditions	FALSE	FALSE
TCP11L2	Q8N4U5	QEALPEKSL	Linear	(91=99)	Both conditions	FALSE	FALSE
TCP11L2	Q8N4U5	SLIDKRIKL	Linear	(436=444)	Both conditions	TRUE	FALSE
TCP11L2	Q8N4U5	EEIREILL	Linear	(134=141)	Both conditions	FALSE	FALSE
TCP11L2	Q8N4U5	KTLMERGL	Linear	(402=409)	IFN-ɣ untreated	TRUE	FALSE
TCP11L2	Q8N4U5	FEEIREILL	Linear	(133=141)	Both conditions	FALSE	FALSE
TCP11L2	Q8N4U5	VNENFQLKQ	Linear	(83=91)	IFN-ɣ untreated	TRUE	FALSE
TCP11L2	Q8N4U5	HEIAVNENFQL	Linear	(79=89)	IFN-ɣ treated	FALSE	FALSE
TCP11L2	Q8N4U5	AENTSKPSL	Linear	(287=295)	IFN-ɣ treated	FALSE	FALSE
TCP11L2	Q8N4U5	AEHSAVDIQGL	Linear	(168=178)	IFN-ɣ treated	FALSE	FALSE
TCP11L2	Q8N4U5	EEIREILLSF	Linear	(134=143)	IFN-ɣ treated	TRUE	FALSE
TCP11L2	Q8N4U5	ALGSQYANIVNL	Linear	(475=486)	IFN-ɣ treated	TRUE	FALSE
TCP11L2	Q8N4U5	AVDLQSTM	Cis-Spliced	(172=176;184=186)	IFN-ɣ untreated	TRUE	FALSE
THADA	Q6YHU6	ALITRIFGV	Linear	(1259=1267)	Both conditions	FALSE	FALSE
THADA	Q6YHU6	FADVEGKNL	Linear	(27=35)	Both conditions	FALSE	FALSE
THADA	Q6YHU6	GLLSIFTKV	Linear	(229=237)	Both conditions	FALSE	FALSE
THADA	Q6YHU6	NLNSQSPGV	Linear	(670=678)	Both conditions	TRUE	FALSE
THADA	Q6YHU6	VENRELIAAEL	Linear	(1669=1679)	Both conditions	FALSE	FALSE
THADA	Q6YHU6	RLGENIIPYV	Linear	(1222=1231)	Both conditions	FALSE	FALSE
THADA	Q6YHU6	TESLLRLEW	Linear	(441=449)	Both conditions	FALSE	FALSE
THADA	Q6YHU6	SALITRIFGV	Linear	(1258=1267)	IFN-ɣ untreated	TRUE	FALSE
THADA	Q6YHU6	QLMNDLLVGI	Linear	(189=198)	IFN-ɣ untreated	TRUE	FALSE
THADA	Q6YHU6	SLLLHCVQL	Linear	(37=45)	IFN-ɣ treated	TRUE	FALSE
THADA	Q6YHU6	SQSPGVRQQI	Linear	(673=682)	IFN-ɣ treated	TRUE	FALSE
THADA	Q6YHU6	EEMQWIQFF	Linear	(658=666)	IFN-ɣ treated	FALSE	FALSE
THADA	Q6YHU6	TESRLAVVEVL	Linear	(1696=1706)	IFN-ɣ treated	TRUE	FALSE
THADA	Q6YHU6	FLLKQLETV	Linear	(1295=1303)	IFN-ɣ treated	FALSE	FALSE
THADA	Q6YHU6	KLPEQWLW	Linear	(1133=1140)	IFN-ɣ treated	TRUE	FALSE
THADA	Q6YHU6	TLLQVFHLL	Linear	(1406=1414)	Both conditions	TRUE	FALSE
THADA	Q6YHU6	HETWVSPLLF	Linear	(523=532)	Both conditions	TRUE	FALSE
THADA	Q6YHU6	TILGSIAEV	Linear	(757=765)	IFN-ɣ treated	TRUE	FALSE
THADA	Q6YHU6	FQHELTDITV	Linear	(1428=1437)	Both conditions	TRUE	FALSE
THADA	Q6YHU6	DDLLQKAKL	Cis-Spliced	(241=245;1440=1443)	IFN-ɣ untreated	TRUE	FALSE
THADA	Q6YHU6	HLLQEKLLL	Cis-Spliced	(1099=1102;950=954)	Both conditions	TRUE	FALSE
THADA	Q6YHU6	LALALAEMQ	Cis-Spliced	(1776=1781;659=661)	IFN-ɣ untreated	TRUE	FALSE
THADA	Q6YHU6	LLSGLAPGL	Cis-Spliced	(1493=1496;1795=1799)	Both conditions	TRUE	FALSE
THADA	Q6YHU6	LRLESLLRL	Cis-Spliced	(601=603;442=447)	Both conditions	TRUE	FALSE
THADA	Q6YHU6	SEQKLLKLL	Cis-Spliced	(1876=1878;1606=1611)	IFN-ɣ treated	TRUE	FALSE
THADA	Q6YHU6	TESLLRLEAM	Cis-Spliced	(441=447;113=115)	IFN-ɣ treated	TRUE	FALSE
THADA	Q6YHU6	TESLLRLEMA	Cis-Spliced	(441=447;1364=1366)	IFN-ɣ untreated	TRUE	FALSE
THADA	Q6YHU6	TLEALLLEL	Cis-Spliced	(1560=1564;1720=1723)	IFN-ɣ untreated	TRUE	FALSE
THADA	Q6YHU6	TLEALLLQL	Cis-Spliced	(1560=1565;939=941)	IFN-ɣ treated	TRUE	FALSE
THADA	Q6YHU6	VALSLFTKV	Cis-Spliced	(11=12;231=237)	Both conditions	TRUE	FALSE
THADA	Q6YHU6	VLNVGRLL	Cis-Spliced	(1122=1124;389=393)	Both conditions	TRUE	FALSE
THADA	Q6YHU6	VTASYLQKV	Cis-Spliced	(846=851;206=208)	IFN-ɣ treated	TRUE	FALSE
THADA	Q6YHU6	WAAALPLL	Cis-Spliced	(1528=1531;1799=1802)	Both conditions	TRUE	FALSE
THADA	Q6YHU6	WAAAPLLL	Cis-Spliced	(1528=1531;1800=1803)	Both conditions	TRUE	FALSE
TOP2A	P11388	AEAERVGLHKVF	Linear	(978=989)	Both conditions	FALSE	FALSE
TOP2A	P11388	YEDEDSLKTL	Linear	(522=531)	Both conditions	FALSE	FALSE
TOP2A	P11388	KLDETGNSLKV	Linear	(278=288)	Both conditions	FALSE	FALSE
TOP2A	P11388	AERVGLHKVF	Linear	(980=989)	IFN-ɣ untreated	FALSE	FALSE
TOP2A	P11388	YLKDKLDET	Linear	(274=282)	Both conditions	FALSE	FALSE
TOP2A	P11388	VADQIVTKL	Linear	(329=337)	Both conditions	FALSE	FALSE
TOP2A	P11388	HTDTTVKF	Linear	(961=968)	Both conditions	FALSE	FALSE
TOP2A	P11388	KIFDEILVNA	Linear	(83=92)	Both conditions	FALSE	FALSE
TOP2A	P11388	KLDETGNSL	Linear	(278=286)	Both conditions	FALSE	FALSE
TOP2A	P11388	FLYDDNQRV	Linear	(828=836)	Both conditions	FALSE	FALSE
TOP2A	P11388	IEISELPVRTW	Linear	(921=931)	Both conditions	FALSE	FALSE
TOP2A	P11388	AEINNIIKI	Linear	(505=513)	Both conditions	FALSE	FALSE
TOP2A	P11388	SLMMTIINL	Linear	(763=771)	Both conditions	FALSE	FALSE
TOP2A	P11388	YLYGQTTTYL	Linear	(684=693)	Both conditions	FALSE	FALSE
TOP2A	P11388	SLDKDIVAL	Linear	(230=238)	Both conditions	FALSE	FALSE
TOP2A	P11388	GVFPLRGKILNV	Linear	(482=493)	Both conditions	FALSE	FALSE
TOP2A	P11388	YLLDMPLWYL	Linear	(1127=1136)	Both conditions	FALSE	FALSE
TOP2A	P11388	GLHKVFKL	Linear	(984=991)	IFN-ɣ untreated	TRUE	FALSE
TOP2A	P11388	KEKKDELCRL	Linear	(1138=1147)	IFN-ɣ untreated	TRUE	FALSE
TOP2A	P11388	YHHGEMSLM	Linear	(757=765)	IFN-ɣ untreated	FALSE	FALSE
TOP2A	P11388	DTLKRKSPSDLW	Linear	(1156=1167)	IFN-ɣ untreated	TRUE	FALSE
TOP2A	P11388	KVSKNKQEMAFY	Linear	(579=590)	IFN-ɣ untreated	TRUE	FALSE
TOP2A	P11388	FILEKIDGKI	Linear	(1054=1063)	IFN-ɣ untreated	TRUE	FALSE
TOP2A	P11388	YHHGEMSL	Linear	(757=764)	IFN-ɣ untreated	FALSE	FALSE
TOP2A	P11388	FLEEFITPI	Linear	(569=577)	IFN-ɣ untreated	FALSE	FALSE
TOP2A	P11388	ILNSTTIEI	Linear	(915=923)	Both conditions	FALSE	FALSE
TOP2A	P11388	GLRKEWLLGM	Linear	(1031=1040)	IFN-ɣ treated	TRUE	FALSE
TOP2A	P11388	LLDMPLWYL	Linear	(1128=1136)	Both conditions	FALSE	FALSE
TOP2A	P11388	IVESILNW	Linear	(407=414)	IFN-ɣ treated	TRUE	FALSE
TOP2A	P11388	TGGRNGYGAKL	Linear	(159=169)	IFN-ɣ treated	TRUE	FALSE
TOP2A	P11388	YHTDTTVKFVV	Linear	(960=970)	IFN-ɣ treated	TRUE	FALSE
TOP2A	P11388	VTDSGPTF	Linear	(1118=1125)	Both conditions	FALSE	FALSE
TOP2A	P11388	GGKAKGKKT	Linear	(1197=1205)	IFN-ɣ treated	TRUE	FALSE
TOP2A	P11388	KQEMAFYSL	Linear	(584=592)	IFN-ɣ treated	TRUE	FALSE
TOP2A	P11388	AVLNNLLKL	Cis-Spliced	(469=470;507=513)	IFN-ɣ untreated	TRUE	FALSE
TOP2A	P11388	FLYDDNQRDLL	Cis-Spliced	(828=835;1017=1019)	Both conditions	TRUE	FALSE
TOP2A	P11388	TTLELVERL	Cis-Spliced	(919=923;30=33)	IFN-ɣ treated	TRUE	FALSE
TOP2A	P11388	YLYGQTTKL	Cis-Spliced	(684=689;335=337)	IFN-ɣ untreated	TRUE	FALSE
TRMT112	F5GX77	LLSSHVRGV	Linear	(8=16)	Both conditions	FALSE	FALSE
TRMT112	F5GX77	FVARMIPKV	Linear	(41=49)	Both conditions	FALSE	FALSE
TRMT112	F5GX77	LSSHVRGV	Linear	(9=16)	Both conditions	FALSE	FALSE
[truncated: 214 more rows]
